# Supplementary material for: Optinalytic (Statistical) Mirroring: A New Novel Approach of Measure of Dispersion
Source: Preprints.org preprint supplement (doi:10.20944/preprints201911.0268.v1), 2019-11-24
Supplement: Supplementary file 1 [file supplementary]

## Sheet: 01
	OPTINALYSIS: SEQUENCE ANALYSIS THROUGH A LOOKING-GLASS
	CN = Central node; Kc = Kabirian coefficient of similarity; %Sim. = Percentage similarity; %Dsim. = Percentage dissimilarity																NUM. = Numeration; DEN. = Denumeration
				For Kc >1		For Kc <1
	RESULTS	CN	Kc	%Sim.	%Dsim.	%Sim.	%Dsim.										NUM	DEN		NUM	DEN
	Seq. 1A	13	0.934132	132.836	-32.8358	75.2809	24.7191										106.587	0.802395		-80.2395	-1.06587
	Seq. 1B	13	1	100	0	100	0										100	1		-100	-1
	Seq. 1C	13	0.95559	120.495	-20.4947	82.9912	17.0088										104.441	0.866769		-86.6769	-1.04441
	Seq. 1D	13	0.975	110.811	-10.8108	90.2439	9.7561										102.5	0.925		-92.5	-1.025
	Seq. 1E	13	0.980447	108.309	-8.30861	92.3288	7.67123										101.955	0.941341		-94.1341	-1.01955
	Seq. 1F	13	0.938754	130.013	-30.0128	76.9155	23.0845										106.125	0.816262		-81.6262	-1.06125
	Seq. 1G	13	0.949772	123.656	-23.6555	80.8698	19.1302										105.023	0.849317		-84.9317	-1.05023
	Seq. 1H	13	0.931596	134.426	-34.4262	74.3902	25.6098										106.84	0.794788		-79.4788	-1.0684
	Seq. 1I	13	0.939759	129.412	-29.4118	77.2727	22.7273										106.024	0.819277		-81.9277	-1.06024
	Seq. 1J	11	1	100	0	100	0										100	1		-100	-1
	Seq. 1K	11	0.963504	116.393	-16.3934	85.9155	14.0845										103.65	0.890511		-89.0511	-1.0365
	Seq. 1L	11	0.93617	131.579	-31.5789	76	24										106.383	0.808511		-80.8511	-1.06383
	Seq. 1M	11	0.90887	150.167	-50.1672	66.5924	33.4076										109.113	0.72661		-72.661	-1.09113
	Seq. 1N	11	0.902683	154.978	-54.9777	64.5254	35.4746										109.732	0.708048		-70.8048	-1.09732
	Seq. 1O	11	0.900787	156.502	-56.5022	63.8968	36.1032										109.921	0.702362		-70.2362	-1.09921
	Seq. 1P	11	1.00001	99.9943	0.00568237	100.006	-0.00568269										99.9986	1.00004		-100.004	-0.999986
	Seq. 1Q	11	0.999986	100.006	-0.00568127	99.9943	0.00568095										100.001	0.999957		-99.9957	-1.00001
	Seq. 1R	11	0	-100	200	-100	200										200	-2		200	-2
	Seq. 1S	11	1.51724	18.9189	81.0811	528.571	-428.571										48.2759	2.55172		-255.172	-0.482759
	Seq. 1T	11	1.23364	45.0549	54.9451	221.951	-121.951										76.6355	1.70093		-170.093	-0.766355
	SEQUENCES	INPUT SEQUENCE																												SEQUENCES	COMPUTATION AND CALCULATIONS
	QUANTITATIVE SCALE	Seq. 1A	Seq. 1B	Seq. 1C	Seq. 1D	Seq. 1E	Seq. 1F	Seq. 1G	Seq. 1H	Seq. 1I	Seq. 1J	Seq. 1K	Seq. 1L	Seq. 1M	Seq. 1N	Seq. 1O	Seq. 1P	Seq. 1Q	Seq. 1R	Seq. 1S	Seq. 1T									QUANTITATIVE SCALE	Seq. 1A	Seq. 1B	Seq. 1C	Seq. 1D	Seq. 1E	Seq. 1F	Seq. 1G	Seq. 1H	Seq. 1I	Seq. 1J	Seq. 1K	Seq. 1L	Seq. 1M	Seq. 1N	Seq. 1O	Seq. 1P	Seq. 1Q	Seq. 1R	Seq. 1S
	1	1	3	1	3	8	2	7	2	2	4	4	4	4	4	4	4	4	-4	-8	-16									1	1	3	1	3	8	2	7	2	2	4	4	4	4	4	4	4	4	-4	-8
	2	2	3	2	4	8	7	7	2	2	4	4	4	4	4	4	4	4	-4	-8	-16									2	4	6	4	8	16	14	14	4	4	8	8	8	8	8	8	8	8	-8	-16
	3	3	3	3	5	8	7	7	2	2	4	4	4	4	4	4	4	4	-4	-8	-16									3	9	9	9	15	24	21	21	6	6	12	12	12	12	12	12	12	12	-12	-24
	4	4	3	4	8	8	7	7	2	2	4	4	4	4	4	4	4	4	-4	-8	-16									4	16	12	16	32	32	28	28	8	8	16	16	16	16	16	16	16	16	-16	-32
	5	5	3	4	8	8	7	7	2	2	4	4	4	4	4	4	4	4	-4	-8	-16									5	25	15	20	40	40	35	35	10	10	20	20	20	20	20	20	20	20	-20	-40
	6	6	3	4	8	8	7	7	2	2	4	8	16	64	152	256	3.999	4.001	4	4	4									6	36	18	24	48	48	42	42	12	12	24	48	96	384	912	1536	23.994	24.006	24	24
	7	7	3	4	8	8	7	7	9	7	4	8	16	64	152	256	3.999	4.001	4	4	4									7	49	21	28	56	56	49	49	63	49	28	56	112	448	1064	1792	27.993	28.007	28	28
	8	8	3	4	8	8	7	7	9	7	4	8	16	64	152	256	3.999	4.001	4	4	4									8	64	24	32	64	64	56	56	72	56	32	64	128	512	1216	2048	31.992	32.008	32	32
	9	9	3	4	8	8	7	7	9	7	4	8	16	64	152	256	3.999	4.001	4	4	4									9	81	27	36	72	72	63	63	81	63	36	72	144	576	1368	2304	35.991	36.009	36	36
	10	10	3	5	8	11	7	7	9	7	4	8	16	64	152	256	3.999	4.001	4	4	4									10	100	30	50	80	110	70	70	90	70	40	80	160	640	1520	2560	39.99	40.01	40	40
	11	11	3	6	8	12	7	7	9	7	0	0	0	0	0	0	0	0	0	0	0									11	121	33	66	88	132	77	77	99	77	0	0	0	0	0	0	0	0	0	0
	12	12	3	7	8	13	35	35	9	7	4	6	10	34	78	130	3.9995	4.0005	0	-2	-6									12	144	36	84	96	156	420	420	108	84	48	72	120	408	936	1560	47.994	48.006	0	-24
	13	0	0	0	0	0	0	0	0	0	4	6	10	34	78	130	3.9995	4.0005	0	-2	-6									13	0	0	0	0	0	0	0	0	0	52	78	130	442	1014	1690	51.9935	52.0065	0	-26
	14	6.5	3	4	7	9	8.9167	9.3333	5.5	4.5	4	6	10	34	78	130	3.9995	4.0005	0	-2	-6									14	91	42	56	98	126	124.834	130.666	77	63	56	84	140	476	1092	1820	55.993	56.007	0	-28
	15	6.5	3	4	7	9	8.9167	9.3333	5.5	4.5	4	6	10	34	78	130	3.9995	4.0005	0	-2	-6									15	97.5	45	60	105	135	133.751	139.999	82.5	67.5	60	90	150	510	1170	1950	59.9925	60.0075	0	-30
	16	6.5	3	4	7	9	8.9167	9.3333	5.5	4.5	4	6	10	34	78	130	3.9995	4.0005	0	-2	-6									16	104	48	64	112	144	142.667	149.333	88	72	64	96	160	544	1248	2080	63.992	64.008	0	-32
	17	6.5	3	4	7	9	8.9167	9.3333	5.5	4.5	4	6	10	34	78	130	3.9995	4.0005	0	-2	-6									17	110.5	51	68	119	153	151.584	158.666	93.5	76.5	68	102	170	578	1326	2210	67.9915	68.0085	0	-34
	18	6.5	3	4	7	9	8.9167	9.3333	5.5	4.5	4	6	10	34	78	130	3.9995	4.0005	0	-2	-6									18	117	54	72	126	162	160.501	167.999	99	81	72	108	180	612	1404	2340	71.991	72.009	0	-36
	19	6.5	3	4	7	9	8.9167	9.3333	5.5	4.5	4	6	10	34	78	130	3.9995	4.0005	0	-2	-6									19	123.5	57	76	133	171	169.417	177.333	104.5	85.5	76	114	190	646	1482	2470	75.9905	76.0095	0	-38
	20	6.5	3	4	7	9	8.9167	9.3333	5.5	4.5	4	6	10	34	78	130	3.9995	4.0005	0	-2	-6									20	130	60	80	140	180	178.334	186.666	110	90	80	120	200	680	1560	2600	79.99	80.01	0	-40
	21	6.5	3	4	7	9	8.9167	9.3333	5.5	4.5	4	6	10	34	78	130	3.9995	4.0005	0	-2	-6									21	136.5	63	84	147	189	187.251	195.999	115.5	94.5	84	126	210	714	1638	2730	83.9895	84.0105	0	-42
	22	6.5	3	4	7	9	8.9167	9.3333	5.5	4.5	0	0	0	0	0	0	0	0	0	0	0									22	143	66	88	154	198	196.167	205.333	121	99	0	0	0	0	0	0	0	0	0	0
	23	6.5	3	4	7	9	8.9167	9.3333	5.5	4.5	0	0	0	0	0	0	0	0	0	0	0									23	149.5	69	92	161	207	205.084	214.666	126.5	103.5	0	0	0	0	0	0	0	0	0	0
	24	6.5	3	4	7	9	8.9167	9.3333	5.5	4.5	0	0	0	0	0	0	0	0	0	0	0									24	156	72	96	168	216	214.001	223.999	132	108	0	0	0	0	0	0	0	0	0	0
	25	6.5	3	4	7	9	8.9167	9.3333	5.5	4.5	0	0	0	0	0	0	0	0	0	0	0									25	162.5	75	100	175	225	222.918	233.332	137.5	112.5	0	0	0	0	0	0	0	0	0	0
	26	0	0	0	0	0	0	0	0	0	0	0	0	0	0	0	0	0	0	0	0									26	0	0	0	0	0	0	0	0	0	0	0	0	0	0	0	0	0	0	0
	27	0	0	0	0	0	0	0	0	0	0	0	0	0	0	0	0	0	0	0	0									27	0	0	0	0	0	0	0	0	0	0	0	0	0	0	0	0	0	0	0
	28	0	0	0	0	0	0	0	0	0	0	0	0	0	0	0	0	0	0	0	0									28	0	0	0	0	0	0	0	0	0	0	0	0	0	0	0	0	0	0	0
	29	0	0	0	0	0	0	0	0	0	0	0	0	0	0	0	0	0	0	0	0									29	0	0	0	0	0	0	0	0	0	0	0	0	0	0	0	0	0	0	0
	30	0	0	0	0	0	0	0	0	0	0	0	0	0	0	0	0	0	0	0	0									30	0	0	0	0	0	0	0	0	0	0	0	0	0	0	0	0	0	0	0
	31	0	0	0	0	0	0	0	0	0	0	0	0	0	0	0	0	0	0	0	0									31	0	0	0	0	0	0	0	0	0	0	0	0	0	0	0	0	0	0	0
	32	0	0	0	0	0	0	0	0	0	0	0	0	0	0	0	0	0	0	0	0									32	0	0	0	0	0	0	0	0	0	0	0	0	0	0	0	0	0	0	0
	33	0	0	0	0	0	0	0	0	0	0	0	0	0	0	0	0	0	0	0	0									33	0	0	0	0	0	0	0	0	0	0	0	0	0	0	0	0	0	0	0
	34	0	0	0	0	0	0	0	0	0	0	0	0	0	0	0	0	0	0	0	0									34	0	0	0	0	0	0	0	0	0	0	0	0	0	0	0	0	0	0	0
	35	0	0	0	0	0	0	0	0	0	0	0	0	0	0	0	0	0	0	0	0									35	0	0	0	0	0	0	0	0	0	0	0	0	0	0	0	0	0	0	0
	36	0	0	0	0	0	0	0	0	0	0	0	0	0	0	0	0	0	0	0	0									36	0	0	0	0	0	0	0	0	0	0	0	0	0	0	0	0	0	0	0
	37	0	0	0	0	0	0	0	0	0	0	0	0	0	0	0	0	0	0	0	0									37	0	0	0	0	0	0	0	0	0	0	0	0	0	0	0	0	0	0	0
	38	0	0	0	0	0	0	0	0	0	0	0	0	0	0	0	0	0	0	0	0									38	0	0	0	0	0	0	0	0	0	0	0	0	0	0	0	0	0	0	0
	39	0	0	0	0	0	0	0	0	0	0	0	0	0	0	0	0	0	0	0	0									39	0	0	0	0	0	0	0	0	0	0	0	0	0	0	0	0	0	0	0
	40	0	0	0	0	0	0	0	0	0	0	0	0	0	0	0	0	0	0	0	0									40	0	0	0	0	0	0	0	0	0	0	0	0	0	0	0	0	0	0	0
	41	0	0	0	0	0	0	0	0	0	0	0	0	0	0	0	0	0	0	0	0									41	0	0	0	0	0	0	0	0	0	0	0	0	0	0	0	0	0	0	0
	42	0	0	0	0	0	0	0	0	0	0	0	0	0	0	0	0	0	0	0	0									42	0	0	0	0	0	0	0	0	0	0	0	0	0	0	0	0	0	0	0
	43	0	0	0	0	0	0	0	0	0	0	0	0	0	0	0	0	0	0	0	0									43	0	0	0	0	0	0	0	0	0	0	0	0	0	0	0	0	0	0	0
	44	0	0	0	0	0	0	0	0	0	0	0	0	0	0	0	0	0	0	0	0									44	0	0	0	0	0	0	0	0	0	0	0	0	0	0	0	0	0	0	0
	45	0	0	0	0	0	0	0	0	0	0	0	0	0	0	0	0	0	0	0	0									45	0	0	0	0	0	0	0	0	0	0	0	0	0	0	0	0	0	0	0
	46	0	0	0	0	0	0	0	0	0	0	0	0	0	0	0	0	0	0	0	0									46	0	0	0	0	0	0	0	0	0	0	0	0	0	0	0	0	0	0	0
	47	0	0	0	0	0	0	0	0	0	0	0	0	0	0	0	0	0	0	0	0									47	0	0	0	0	0	0	0	0	0	0	0	0	0	0	0	0	0	0	0
	48	0	0	0	0	0	0	0	0	0	0	0	0	0	0	0	0	0	0	0	0									48	0	0	0	0	0	0	0	0	0	0	0	0	0	0	0	0	0	0	0
	49	0	0	0	0	0	0	0	0	0	0	0	0	0	0	0	0	0	0	0	0									49	0	0	0	0	0	0	0	0	0	0	0	0	0	0	0	0	0	0	0
	50	0	0	0	0	0	0	0	0	0	0	0	0	0	0	0	0	0	0	0	0									50	0	0	0	0	0	0	0	0	0	0	0	0	0	0	0	0	0	0	0
	51	0	0	0	0	0	0	0	0	0	0	0	0	0	0	0	0	0	0	0	0									51	0	0	0	0	0	0	0	0	0	0	0	0	0	0	0	0	0	0	0
	52	0	0	0	0	0	0	0	0	0	0	0	0	0	0	0	0	0	0	0	0									52	0	0	0	0	0	0	0	0	0	0	0	0	0	0	0	0	0	0	0
	53	0	0	0	0	0	0	0	0	0	0	0	0	0	0	0	0	0	0	0	0									53	0	0	0	0	0	0	0	0	0	0	0	0	0	0	0	0	0	0	0
	54	0	0	0	0	0	0	0	0	0	0	0	0	0	0	0	0	0	0	0	0									54	0	0	0	0	0	0	0	0	0	0	0	0	0	0	0	0	0	0	0
	55	0	0	0	0	0	0	0	0	0	0	0	0	0	0	0	0	0	0	0	0									55	0	0	0	0	0	0	0	0	0	0	0	0	0	0	0	0	0	0	0
	56	0	0	0	0	0	0	0	0	0	0	0	0	0	0	0	0	0	0	0	0									56	0	0	0	0	0	0	0	0	0	0	0	0	0	0	0	0	0	0	0
	57	0	0	0	0	0	0	0	0	0	0	0	0	0	0	0	0	0	0	0	0									57	0	0	0	0	0	0	0	0	0	0	0	0	0	0	0	0	0	0	0
	58	0	0	0	0	0	0	0	0	0	0	0	0	0	0	0	0	0	0	0	0									58	0	0	0	0	0	0	0	0	0	0	0	0	0	0	0	0	0	0	0
	59	0	0	0	0	0	0	0	0	0	0	0	0	0	0	0	0	0	0	0	0									59	0	0	0	0	0	0	0	0	0	0	0	0	0	0	0	0	0	0	0
	60	0	0	0	0	0	0	0	0	0	0	0	0	0	0	0	0	0	0	0	0									60	0	0	0	0	0	0	0	0	0	0	0	0	0	0	0	0	0	0	0
	61	0	0	0	0	0	0	0	0	0	0	0	0	0	0	0	0	0	0	0	0									61	0	0	0	0	0	0	0	0	0	0	0	0	0	0	0	0	0	0	0
	62	0	0	0	0	0	0	0	0	0	0	0	0	0	0	0	0	0	0	0	0									62	0	0	0	0	0	0	0	0	0	0	0	0	0	0	0	0	0	0	0
	63	0	0	0	0	0	0	0	0	0	0	0	0	0	0	0	0	0	0	0	0									63	0	0	0	0	0	0	0	0	0	0	0	0	0	0	0	0	0	0	0
	64	0	0	0	0	0	0	0	0	0	0	0	0	0	0	0	0	0	0	0	0									64	0	0	0	0	0	0	0	0	0	0	0	0	0	0	0	0	0	0	0
	65	0	0	0	0	0	0	0	0	0	0	0	0	0	0	0	0	0	0	0	0									65	0	0	0	0	0	0	0	0	0	0	0	0	0	0	0	0	0	0	0
	66	0	0	0	0	0	0	0	0	0	0	0	0	0	0	0	0	0	0	0	0									66	0	0	0	0	0	0	0	0	0	0	0	0	0	0	0	0	0	0	0
	67	0	0	0	0	0	0	0	0	0	0	0	0	0	0	0	0	0	0	0	0									67	0	0	0	0	0	0	0	0	0	0	0	0	0	0	0	0	0	0	0
	68	0	0	0	0	0	0	0	0	0	0	0	0	0	0	0	0	0	0	0	0									68	0	0	0	0	0	0	0	0	0	0	0	0	0	0	0	0	0	0	0
	69	0	0	0	0	0	0	0	0	0	0	0	0	0	0	0	0	0	0	0	0									69	0	0	0	0	0	0	0	0	0	0	0	0	0	0	0	0	0	0	0
	70	0	0	0	0	0	0	0	0	0	0	0	0	0	0	0	0	0	0	0	0									70	0	0	0	0	0	0	0	0	0	0	0	0	0	0	0	0	0	0	0
	71	0	0	0	0	0	0	0	0	0	0	0	0	0	0	0	0	0	0	0	0									71	0	0	0	0	0	0	0	0	0	0	0	0	0	0	0	0	0	0	0
	72	0	0	0	0	0	0	0	0	0	0	0	0	0	0	0	0	0	0	0	0									72	0	0	0	0	0	0	0	0	0	0	0	0	0	0	0	0	0	0	0
	73	0	0	0	0	0	0	0	0	0	0	0	0	0	0	0	0	0	0	0	0									73	0	0	0	0	0	0	0	0	0	0	0	0	0	0	0	0	0	0	0
	74	0	0	0	0	0	0	0	0	0	0	0	0	0	0	0	0	0	0	0	0									74	0	0	0	0	0	0	0	0	0	0	0	0	0	0	0	0	0	0	0
	75	0	0	0	0	0	0	0	0	0	0	0	0	0	0	0	0	0	0	0	0									75	0	0	0	0	0	0	0	0	0	0	0	0	0	0	0	0	0	0	0
	76	0	0	0	0	0	0	0	0	0	0	0	0	0	0	0	0	0	0	0	0									76	0	0	0	0	0	0	0	0	0	0	0	0	0	0	0	0	0	0	0
	77	0	0	0	0	0	0	0	0	0	0	0	0	0	0	0	0	0	0	0	0									77	0	0	0	0	0	0	0	0	0	0	0	0	0	0	0	0	0	0	0
	78	0	0	0	0	0	0	0	0	0	0	0	0	0	0	0	0	0	0	0	0									78	0	0	0	0	0	0	0	0	0	0	0	0	0	0	0	0	0	0	0
	79	0	0	0	0	0	0	0	0	0	0	0	0	0	0	0	0	0	0	0	0									79	0	0	0	0	0	0	0	0	0	0	0	0	0	0	0	0	0	0	0
	80	0	0	0	0	0	0	0	0	0	0	0	0	0	0	0	0	0	0	0	0									80	0	0	0	0	0	0	0	0	0	0	0	0	0	0	0	0	0	0	0
	81	0	0	0	0	0	0	0	0	0	0	0	0	0	0	0	0	0	0	0	0									81	0	0	0	0	0	0	0	0	0	0	0	0	0	0	0	0	0	0	0
	82	0	0	0	0	0	0	0	0	0	0	0	0	0	0	0	0	0	0	0	0									82	0	0	0	0	0	0	0	0	0	0	0	0	0	0	0	0	0	0	0
	83	0	0	0	0	0	0	0	0	0	0	0	0	0	0	0	0	0	0	0	0									83	0	0	0	0	0	0	0	0	0	0	0	0	0	0	0	0	0	0	0
	84	0	0	0	0	0	0	0	0	0	0	0	0	0	0	0	0	0	0	0	0									84	0	0	0	0	0	0	0	0	0	0	0	0	0	0	0	0	0	0	0
	85	0	0	0	0	0	0	0	0	0	0	0	0	0	0	0	0	0	0	0	0									85	0	0	0	0	0	0	0	0	0	0	0	0	0	0	0	0	0	0	0
	86	0	0	0	0	0	0	0	0	0	0	0	0	0	0	0	0	0	0	0	0									86	0	0	0	0	0	0	0	0	0	0	0	0	0	0	0	0	0	0	0
	87	0	0	0	0	0	0	0	0	0	0	0	0	0	0	0	0	0	0	0	0									87	0	0	0	0	0	0	0	0	0	0	0	0	0	0	0	0	0	0	0
	88	0	0	0	0	0	0	0	0	0	0	0	0	0	0	0	0	0	0	0	0									88	0	0	0	0	0	0	0	0	0	0	0	0	0	0	0	0	0	0	0
	89	0	0	0	0	0	0	0	0	0	0	0	0	0	0	0	0	0	0	0	0									89	0	0	0	0	0	0	0	0	0	0	0	0	0	0	0	0	0	0	0
	90	0	0	0	0	0	0	0	0	0	0	0	0	0	0	0	0	0	0	0	0									90	0	0	0	0	0	0	0	0	0	0	0	0	0	0	0	0	0	0	0
	91	0	0	0	0	0	0	0	0	0	0	0	0	0	0	0	0	0	0	0	0									91	0	0	0	0	0	0	0	0	0	0	0	0	0	0	0	0	0	0	0
	92	0	0	0	0	0	0	0	0	0	0	0	0	0	0	0	0	0	0	0	0									92	0	0	0	0	0	0	0	0	0	0	0	0	0	0	0	0	0	0	0
	93	0	0	0	0	0	0	0	0	0	0	0	0	0	0	0	0	0	0	0	0									93	0	0	0	0	0	0	0	0	0	0	0	0	0	0	0	0	0	0	0
	94	0	0	0	0	0	0	0	0	0	0	0	0	0	0	0	0	0	0	0	0									94	0	0	0	0	0	0	0	0	0	0	0	0	0	0	0	0	0	0	0
	95	0	0	0	0	0	0	0	0	0	0	0	0	0	0	0	0	0	0	0	0									95	0	0	0	0	0	0	0	0	0	0	0	0	0	0	0	0	0	0	0
	96	0	0	0	0	0	0	0	0	0	0	0	0	0	0	0	0	0	0	0	0									96	0	0	0	0	0	0	0	0	0	0	0	0	0	0	0	0	0	0	0
	97	0	0	0	0	0	0	0	0	0	0	0	0	0	0	0	0	0	0	0	0									97	0	0	0	0	0	0	0	0	0	0	0	0	0	0	0	0	0	0	0
	98	0	0	0	0	0	0	0	0	0	0	0	0	0	0	0	0	0	0	0	0									98	0	0	0	0	0	0	0	0	0	0	0	0	0	0	0	0	0	0	0
	99	0	0	0	0	0	0	0	0	0	0	0	0	0	0	0	0	0	0	0	0									99	0	0	0	0	0	0	0	0	0	0	0	0	0	0	0	0	0	0	0
	100	0	0	0	0	0	0	0	0	0	0	0	0	0	0	0	0	0	0	0	0									100	0	0	0	0	0	0	0	0	0	0	0	0	0	0	0	0	0	0	0
	101	0	0	0	0	0	0	0	0	0	0	0	0	0	0	0	0	0	0	0	0									101	0	0	0	0	0	0	0	0	0	0	0	0	0	0	0	0	0	0	0
	102	0	0	0	0	0	0	0	0	0	0	0	0	0	0	0	0	0	0	0	0									102	0	0	0	0	0	0	0	0	0	0	0	0	0	0	0	0	0	0	0
	103	0	0	0	0	0	0	0	0	0	0	0	0	0	0	0	0	0	0	0	0									103	0	0	0	0	0	0	0	0	0	0	0	0	0	0	0	0	0	0	0
	104	0	0	0	0	0	0	0	0	0	0	0	0	0	0	0	0	0	0	0	0									104	0	0	0	0	0	0	0	0	0	0	0	0	0	0	0	0	0	0	0
	105	0	0	0	0	0	0	0	0	0	0	0	0	0	0	0	0	0	0	0	0									105	0	0	0	0	0	0	0	0	0	0	0	0	0	0	0	0	0	0	0
	106	0	0	0	0	0	0	0	0	0	0	0	0	0	0	0	0	0	0	0	0									106	0	0	0	0	0	0	0	0	0	0	0	0	0	0	0	0	0	0	0
	107	0	0	0	0	0	0	0	0	0	0	0	0	0	0	0	0	0	0	0	0									107	0	0	0	0	0	0	0	0	0	0	0	0	0	0	0	0	0	0	0
	108	0	0	0	0	0	0	0	0	0	0	0	0	0	0	0	0	0	0	0	0									108	0	0	0	0	0	0	0	0	0	0	0	0	0	0	0	0	0	0	0
	109	0	0	0	0	0	0	0	0	0	0	0	0	0	0	0	0	0	0	0	0									109	0	0	0	0	0	0	0	0	0	0	0	0	0	0	0	0	0	0	0
	110	0	0	0	0	0	0	0	0	0	0	0	0	0	0	0	0	0	0	0	0									110	0	0	0	0	0	0	0	0	0	0	0	0	0	0	0	0	0	0	0
	111	0	0	0	0	0	0	0	0	0	0	0	0	0	0	0	0	0	0	0	0									111	0	0	0	0	0	0	0	0	0	0	0	0	0	0	0	0	0	0	0
	112	0	0	0	0	0	0	0	0	0	0	0	0	0	0	0	0	0	0	0	0									112	0	0	0	0	0	0	0	0	0	0	0	0	0	0	0	0	0	0	0
	113	0	0	0	0	0	0	0	0	0	0	0	0	0	0	0	0	0	0	0	0									113	0	0	0	0	0	0	0	0	0	0	0	0	0	0	0	0	0	0	0
	114	0	0	0	0	0	0	0	0	0	0	0	0	0	0	0	0	0	0	0	0									114	0	0	0	0	0	0	0	0	0	0	0	0	0	0	0	0	0	0	0
	115	0	0	0	0	0	0	0	0	0	0	0	0	0	0	0	0	0	0	0	0									115	0	0	0	0	0	0	0	0	0	0	0	0	0	0	0	0	0	0	0
	116	0	0	0	0	0	0	0	0	0	0	0	0	0	0	0	0	0	0	0	0									116	0	0	0	0	0	0	0	0	0	0	0	0	0	0	0	0	0	0	0
	117	0	0	0	0	0	0	0	0	0	0	0	0	0	0	0	0	0	0	0	0									117	0	0	0	0	0	0	0	0	0	0	0	0	0	0	0	0	0	0	0
	118	0	0	0	0	0	0	0	0	0	0	0	0	0	0	0	0	0	0	0	0									118	0	0	0	0	0	0	0	0	0	0	0	0	0	0	0	0	0	0	0
	119	0	0	0	0	0	0	0	0	0	0	0	0	0	0	0	0	0	0	0	0									119	0	0	0	0	0	0	0	0	0	0	0	0	0	0	0	0	0	0	0
	120	0	0	0	0	0	0	0	0	0	0	0	0	0	0	0	0	0	0	0	0									120	0	0	0	0	0	0	0	0	0	0	0	0	0	0	0	0	0	0	0
	121	0	0	0	0	0	0	0	0	0	0	0	0	0	0	0	0	0	0	0	0									121	0	0	0	0	0	0	0	0	0	0	0	0	0	0	0	0	0	0	0
	122	0	0	0	0	0	0	0	0	0	0	0	0	0	0	0	0	0	0	0	0									122	0	0	0	0	0	0	0	0	0	0	0	0	0	0	0	0	0	0	0
	123	0	0	0	0	0	0	0	0	0	0	0	0	0	0	0	0	0	0	0	0									123	0	0	0	0	0	0	0	0	0	0	0	0	0	0	0	0	0	0	0
	124	0	0	0	0	0	0	0	0	0	0	0	0	0	0	0	0	0	0	0	0									124	0	0	0	0	0	0	0	0	0	0	0	0	0	0	0	0	0	0	0
	125	0	0	0	0	0	0	0	0	0	0	0	0	0	0	0	0	0	0	0	0									125	0	0	0	0	0	0	0	0	0	0	0	0	0	0	0	0	0	0	0
	126	0	0	0	0	0	0	0	0	0	0	0	0	0	0	0	0	0	0	0	0									126	0	0	0	0	0	0	0	0	0	0	0	0	0	0	0	0	0	0	0
	127	0	0	0	0	0	0	0	0	0	0	0	0	0	0	0	0	0	0	0	0									127	0	0	0	0	0	0	0	0	0	0	0	0	0	0	0	0	0	0	0
	128	0	0	0	0	0	0	0	0	0	0	0	0	0	0	0	0	0	0	0	0									128	0	0	0	0	0	0	0	0	0	0	0	0	0	0	0	0	0	0	0
	129	0	0	0	0	0	0	0	0	0	0	0	0	0	0	0	0	0	0	0	0									129	0	0	0	0	0	0	0	0	0	0	0	0	0	0	0	0	0	0	0
	130	0	0	0	0	0	0	0	0	0	0	0	0	0	0	0	0	0	0	0	0									130	0	0	0	0	0	0	0	0	0	0	0	0	0	0	0	0	0	0	0
	131	0	0	0	0	0	0	0	0	0	0	0	0	0	0	0	0	0	0	0	0									131	0	0	0	0	0	0	0	0	0	0	0	0	0	0	0	0	0	0	0
	132	0	0	0	0	0	0	0	0	0	0	0	0	0	0	0	0	0	0	0	0									132	0	0	0	0	0	0	0	0	0	0	0	0	0	0	0	0	0	0	0
	133	0	0	0	0	0	0	0	0	0	0	0	0	0	0	0	0	0	0	0	0									133	0	0	0	0	0	0	0	0	0	0	0	0	0	0	0	0	0	0	0
	134	0	0	0	0	0	0	0	0	0	0	0	0	0	0	0	0	0	0	0	0									134	0	0	0	0	0	0	0	0	0	0	0	0	0	0	0	0	0	0	0
	135	0	0	0	0	0	0	0	0	0	0	0	0	0	0	0	0	0	0	0	0									135	0	0	0	0	0	0	0	0	0	0	0	0	0	0	0	0	0	0	0
	136	0	0	0	0	0	0	0	0	0	0	0	0	0	0	0	0	0	0	0	0									136	0	0	0	0	0	0	0	0	0	0	0	0	0	0	0	0	0	0	0
	137	0	0	0	0	0	0	0	0	0	0	0	0	0	0	0	0	0	0	0	0									137	0	0	0	0	0	0	0	0	0	0	0	0	0	0	0	0	0	0	0
	138	0	0	0	0	0	0	0	0	0	0	0	0	0	0	0	0	0	0	0	0									138	0	0	0	0	0	0	0	0	0	0	0	0	0	0	0	0	0	0	0
	139	0	0	0	0	0	0	0	0	0	0	0	0	0	0	0	0	0	0	0	0									139	0	0	0	0	0	0	0	0	0	0	0	0	0	0	0	0	0	0	0
	140	0	0	0	0	0	0	0	0	0	0	0	0	0	0	0	0	0	0	0	0									140	0	0	0	0	0	0	0	0	0	0	0	0	0	0	0	0	0	0	0
	141	0	0	0	0	0	0	0	0	0	0	0	0	0	0	0	0	0	0	0	0									141	0	0	0	0	0	0	0	0	0	0	0	0	0	0	0	0	0	0	0
	142	0	0	0	0	0	0	0	0	0	0	0	0	0	0	0	0	0	0	0	0									142	0	0	0	0	0	0	0	0	0	0	0	0	0	0	0	0	0	0	0
	143	0	0	0	0	0	0	0	0	0	0	0	0	0	0	0	0	0	0	0	0									143	0	0	0	0	0	0	0	0	0	0	0	0	0	0	0	0	0	0	0
	144	0	0	0	0	0	0	0	0	0	0	0	0	0	0	0	0	0	0	0	0									144	0	0	0	0	0	0	0	0	0	0	0	0	0	0	0	0	0	0	0
	145	0	0	0	0	0	0	0	0	0	0	0	0	0	0	0	0	0	0	0	0									145	0	0	0	0	0	0	0	0	0	0	0	0	0	0	0	0	0	0	0
	146	0	0	0	0	0	0	0	0	0	0	0	0	0	0	0	0	0	0	0	0									146	0	0	0	0	0	0	0	0	0	0	0	0	0	0	0	0	0	0	0
	147	0	0	0	0	0	0	0	0	0	0	0	0	0	0	0	0	0	0	0	0									147	0	0	0	0	0	0	0	0	0	0	0	0	0	0	0	0	0	0	0
	148	0	0	0	0	0	0	0	0	0	0	0	0	0	0	0	0	0	0	0	0									148	0	0	0	0	0	0	0	0	0	0	0	0	0	0	0	0	0	0	0
	149	0	0	0	0	0	0	0	0	0	0	0	0	0	0	0	0	0	0	0	0									149	0	0	0	0	0	0	0	0	0	0	0	0	0	0	0	0	0	0	0
	150	0	0	0	0	0	0	0	0	0	0	0	0	0	0	0	0	0	0	0	0									150	0	0	0	0	0	0	0	0	0	0	0	0	0	0	0	0	0	0	0
	151	0	0	0	0	0	0	0	0	0	0	0	0	0	0	0	0	0	0	0	0									151	0	0	0	0	0	0	0	0	0	0	0	0	0	0	0	0	0	0	0
	152	0	0	0	0	0	0	0	0	0	0	0	0	0	0	0	0	0	0	0	0									152	0	0	0	0	0	0	0	0	0	0	0	0	0	0	0	0	0	0	0
	153	0	0	0	0	0	0	0	0	0	0	0	0	0	0	0	0	0	0	0	0									153	0	0	0	0	0	0	0	0	0	0	0	0	0	0	0	0	0	0	0
	154	0	0	0	0	0	0	0	0	0	0	0	0	0	0	0	0	0	0	0	0									154	0	0	0	0	0	0	0	0	0	0	0	0	0	0	0	0	0	0	0
	155	0	0	0	0	0	0	0	0	0	0	0	0	0	0	0	0	0	0	0	0									155	0	0	0	0	0	0	0	0	0	0	0	0	0	0	0	0	0	0	0
	156	0	0	0	0	0	0	0	0	0	0	0	0	0	0	0	0	0	0	0	0									156	0	0	0	0	0	0	0	0	0	0	0	0	0	0	0	0	0	0	0
	157	0	0	0	0	0	0	0	0	0	0	0	0	0	0	0	0	0	0	0	0									157	0	0	0	0	0	0	0	0	0	0	0	0	0	0	0	0	0	0	0
	158	0	0	0	0	0	0	0	0	0	0	0	0	0	0	0	0	0	0	0	0									158	0	0	0	0	0	0	0	0	0	0	0	0	0	0	0	0	0	0	0
	159	0	0	0	0	0	0	0	0	0	0	0	0	0	0	0	0	0	0	0	0									159	0	0	0	0	0	0	0	0	0	0	0	0	0	0	0	0	0	0	0
	160	0	0	0	0	0	0	0	0	0	0	0	0	0	0	0	0	0	0	0	0									160	0	0	0	0	0	0	0	0	0	0	0	0	0	0	0	0	0	0	0
	161	0	0	0	0	0	0	0	0	0	0	0	0	0	0	0	0	0	0	0	0									161	0	0	0	0	0	0	0	0	0	0	0	0	0	0	0	0	0	0	0
	162	0	0	0	0	0	0	0	0	0	0	0	0	0	0	0	0	0	0	0	0									162	0	0	0	0	0	0	0	0	0	0	0	0	0	0	0	0	0	0	0
	163	0	0	0	0	0	0	0	0	0	0	0	0	0	0	0	0	0	0	0	0									163	0	0	0	0	0	0	0	0	0	0	0	0	0	0	0	0	0	0	0
	164	0	0	0	0	0	0	0	0	0	0	0	0	0	0	0	0	0	0	0	0									164	0	0	0	0	0	0	0	0	0	0	0	0	0	0	0	0	0	0	0
	165	0	0	0	0	0	0	0	0	0	0	0	0	0	0	0	0	0	0	0	0									165	0	0	0	0	0	0	0	0	0	0	0	0	0	0	0	0	0	0	0
	166	0	0	0	0	0	0	0	0	0	0	0	0	0	0	0	0	0	0	0	0									166	0	0	0	0	0	0	0	0	0	0	0	0	0	0	0	0	0	0	0
	167	0	0	0	0	0	0	0	0	0	0	0	0	0	0	0	0	0	0	0	0									167	0	0	0	0	0	0	0	0	0	0	0	0	0	0	0	0	0	0	0
	168	0	0	0	0	0	0	0	0	0	0	0	0	0	0	0	0	0	0	0	0									168	0	0	0	0	0	0	0	0	0	0	0	0	0	0	0	0	0	0	0
	169	0	0	0	0	0	0	0	0	0	0	0	0	0	0	0	0	0	0	0	0									169	0	0	0	0	0	0	0	0	0	0	0	0	0	0	0	0	0	0	0
	170	0	0	0	0	0	0	0	0	0	0	0	0	0	0	0	0	0	0	0	0									170	0	0	0	0	0	0	0	0	0	0	0	0	0	0	0	0	0	0	0
	171	0	0	0	0	0	0	0	0	0	0	0	0	0	0	0	0	0	0	0	0									171	0	0	0	0	0	0	0	0	0	0	0	0	0	0	0	0	0	0	0
	172	0	0	0	0	0	0	0	0	0	0	0	0	0	0	0	0	0	0	0	0									172	0	0	0	0	0	0	0	0	0	0	0	0	0	0	0	0	0	0	0
	173	0	0	0	0	0	0	0	0	0	0	0	0	0	0	0	0	0	0	0	0									173	0	0	0	0	0	0	0	0	0	0	0	0	0	0	0	0	0	0	0
	174	0	0	0	0	0	0	0	0	0	0	0	0	0	0	0	0	0	0	0	0									174	0	0	0	0	0	0	0	0	0	0	0	0	0	0	0	0	0	0	0
	175	0	0	0	0	0	0	0	0	0	0	0	0	0	0	0	0	0	0	0	0									175	0	0	0	0	0	0	0	0	0	0	0	0	0	0	0	0	0	0	0
	176	0	0	0	0	0	0	0	0	0	0	0	0	0	0	0	0	0	0	0	0									176	0	0	0	0	0	0	0	0	0	0	0	0	0	0	0	0	0	0	0
	177	0	0	0	0	0	0	0	0	0	0	0	0	0	0	0	0	0	0	0	0									177	0	0	0	0	0	0	0	0	0	0	0	0	0	0	0	0	0	0	0
	178	0	0	0	0	0	0	0	0	0	0	0	0	0	0	0	0	0	0	0	0									178	0	0	0	0	0	0	0	0	0	0	0	0	0	0	0	0	0	0	0
	179	0	0	0	0	0	0	0	0	0	0	0	0	0	0	0	0	0	0	0	0									179	0	0	0	0	0	0	0	0	0	0	0	0	0	0	0	0	0	0	0
	180	0	0	0	0	0	0	0	0	0	0	0	0	0	0	0	0	0	0	0	0									180	0	0	0	0	0	0	0	0	0	0	0	0	0	0	0	0	0	0	0
	181	0	0	0	0	0	0	0	0	0	0	0	0	0	0	0	0	0	0	0	0									181	0	0	0	0	0	0	0	0	0	0	0	0	0	0	0	0	0	0	0
	182	0	0	0	0	0	0	0	0	0	0	0	0	0	0	0	0	0	0	0	0									182	0	0	0	0	0	0	0	0	0	0	0	0	0	0	0	0	0	0	0
	183	0	0	0	0	0	0	0	0	0	0	0	0	0	0	0	0	0	0	0	0									183	0	0	0	0	0	0	0	0	0	0	0	0	0	0	0	0	0	0	0
	184	0	0	0	0	0	0	0	0	0	0	0	0	0	0	0	0	0	0	0	0									184	0	0	0	0	0	0	0	0	0	0	0	0	0	0	0	0	0	0	0
	185	0	0	0	0	0	0	0	0	0	0	0	0	0	0	0	0	0	0	0	0									185	0	0	0	0	0	0	0	0	0	0	0	0	0	0	0	0	0	0	0
	186	0	0	0	0	0	0	0	0	0	0	0	0	0	0	0	0	0	0	0	0									186	0	0	0	0	0	0	0	0	0	0	0	0	0	0	0	0	0	0	0
	187	0	0	0	0	0	0	0	0	0	0	0	0	0	0	0	0	0	0	0	0									187	0	0	0	0	0	0	0	0	0	0	0	0	0	0	0	0	0	0	0
	188	0	0	0	0	0	0	0	0	0	0	0	0	0	0	0	0	0	0	0	0									188	0	0	0	0	0	0	0	0	0	0	0	0	0	0	0	0	0	0	0
	189	0	0	0	0	0	0	0	0	0	0	0	0	0	0	0	0	0	0	0	0									189	0	0	0	0	0	0	0	0	0	0	0	0	0	0	0	0	0	0	0
	190	0	0	0	0	0	0	0	0	0	0	0	0	0	0	0	0	0	0	0	0									190	0	0	0	0	0	0	0	0	0	0	0	0	0	0	0	0	0	0	0
	191	0	0	0	0	0	0	0	0	0	0	0	0	0	0	0	0	0	0	0	0									191	0	0	0	0	0	0	0	0	0	0	0	0	0	0	0	0	0	0	0
	192	0	0	0	0	0	0	0	0	0	0	0	0	0	0	0	0	0	0	0	0									192	0	0	0	0	0	0	0	0	0	0	0	0	0	0	0	0	0	0	0
	193	0	0	0	0	0	0	0	0	0	0	0	0	0	0	0	0	0	0	0	0									193	0	0	0	0	0	0	0	0	0	0	0	0	0	0	0	0	0	0	0
	194	0	0	0	0	0	0	0	0	0	0	0	0	0	0	0	0	0	0	0	0									194	0	0	0	0	0	0	0	0	0	0	0	0	0	0	0	0	0	0	0
	195	0	0	0	0	0	0	0	0	0	0	0	0	0	0	0	0	0	0	0	0									195	0	0	0	0	0	0	0	0	0	0	0	0	0	0	0	0	0	0	0
	196	0	0	0	0	0	0	0	0	0	0	0	0	0	0	0	0	0	0	0	0									196	0	0	0	0	0	0	0	0	0	0	0	0	0	0	0	0	0	0	0
	197	0	0	0	0	0	0	0	0	0	0	0	0	0	0	0	0	0	0	0	0									197	0	0	0	0	0	0	0	0	0	0	0	0	0	0	0	0	0	0	0
	198	0	0	0	0	0	0	0	0	0	0	0	0	0	0	0	0	0	0	0	0									198	0	0	0	0	0	0	0	0	0	0	0	0	0	0	0	0	0	0	0
	199	0	0	0	0	0	0	0	0	0	0	0	0	0	0	0	0	0	0	0	0									199	0	0	0	0	0	0	0	0	0	0	0	0	0	0	0	0	0	0	0
	200	0	0	0	0	0	0	0	0	0	0	0	0	0	0	0	0	0	0	0	0									200	0	0	0	0	0	0	0	0	0	0	0	0	0	0	0	0	0	0	0
	201	0	0	0	0	0	0	0	0	0	0	0	0	0	0	0	0	0	0	0	0									201	0	0	0	0	0	0	0	0	0	0	0	0	0	0	0	0	0	0	0
	202	0	0	0	0	0	0	0	0	0	0	0	0	0	0	0	0	0	0	0	0									202	0	0	0	0	0	0	0	0	0	0	0	0	0	0	0	0	0	0	0
	203	0	0	0	0	0	0	0	0	0	0	0	0	0	0	0	0	0	0	0	0									203	0	0	0	0	0	0	0	0	0	0	0	0	0	0	0	0	0	0	0
	204	0	0	0	0	0	0	0	0	0	0	0	0	0	0	0	0	0	0	0	0									204	0	0	0	0	0	0	0	0	0	0	0	0	0	0	0	0	0	0	0
	205	0	0	0	0	0	0	0	0	0	0	0	0	0	0	0	0	0	0	0	0									205	0	0	0	0	0	0	0	0	0	0	0	0	0	0	0	0	0	0	0
	206	0	0	0	0	0	0	0	0	0	0	0	0	0	0	0	0	0	0	0	0									206	0	0	0	0	0	0	0	0	0	0	0	0	0	0	0	0	0	0	0
	207	0	0	0	0	0	0	0	0	0	0	0	0	0	0	0	0	0	0	0	0									207	0	0	0	0	0	0	0	0	0	0	0	0	0	0	0	0	0	0	0
	208	0	0	0	0	0	0	0	0	0	0	0	0	0	0	0	0	0	0	0	0									208	0	0	0	0	0	0	0	0	0	0	0	0	0	0	0	0	0	0	0
	209	0	0	0	0	0	0	0	0	0	0	0	0	0	0	0	0	0	0	0	0									209	0	0	0	0	0	0	0	0	0	0	0	0	0	0	0	0	0	0	0
	210	0	0	0	0	0	0	0	0	0	0	0	0	0	0	0	0	0	0	0	0									210	0	0	0	0	0	0	0	0	0	0	0	0	0	0	0	0	0	0	0
	211	0	0	0	0	0	0	0	0	0	0	0	0	0	0	0	0	0	0	0	0									211	0	0	0	0	0	0	0	0	0	0	0	0	0	0	0	0	0	0	0
	212	0	0	0	0	0	0	0	0	0	0	0	0	0	0	0	0	0	0	0	0									212	0	0	0	0	0	0	0	0	0	0	0	0	0	0	0	0	0	0	0
	213	0	0	0	0	0	0	0	0	0	0	0	0	0	0	0	0	0	0	0	0									213	0	0	0	0	0	0	0	0	0	0	0	0	0	0	0	0	0	0	0
	214	0	0	0	0	0	0	0	0	0	0	0	0	0	0	0	0	0	0	0	0									214	0	0	0	0	0	0	0	0	0	0	0	0	0	0	0	0	0	0	0
	215	0	0	0	0	0	0	0	0	0	0	0	0	0	0	0	0	0	0	0	0									215	0	0	0	0	0	0	0	0	0	0	0	0	0	0	0	0	0	0	0
	216	0	0	0	0	0	0	0	0	0	0	0	0	0	0	0	0	0	0	0	0									216	0	0	0	0	0	0	0	0	0	0	0	0	0	0	0	0	0	0	0
	217	0	0	0	0	0	0	0	0	0	0	0	0	0	0	0	0	0	0	0	0									217	0	0	0	0	0	0	0	0	0	0	0	0	0	0	0	0	0	0	0
	218	0	0	0	0	0	0	0	0	0	0	0	0	0	0	0	0	0	0	0	0									218	0	0	0	0	0	0	0	0	0	0	0	0	0	0	0	0	0	0	0
	219	0	0	0	0	0	0	0	0	0	0	0	0	0	0	0	0	0	0	0	0									219	0	0	0	0	0	0	0	0	0	0	0	0	0	0	0	0	0	0	0
	220	0	0	0	0	0	0	0	0	0	0	0	0	0	0	0	0	0	0	0	0									220	0	0	0	0	0	0	0	0	0	0	0	0	0	0	0	0	0	0	0
	221	0	0	0	0	0	0	0	0	0	0	0	0	0	0	0	0	0	0	0	0									221	0	0	0	0	0	0	0	0	0	0	0	0	0	0	0	0	0	0	0
	222	0	0	0	0	0	0	0	0	0	0	0	0	0	0	0	0	0	0	0	0									222	0	0	0	0	0	0	0	0	0	0	0	0	0	0	0	0	0	0	0
	223	0	0	0	0	0	0	0	0	0	0	0	0	0	0	0	0	0	0	0	0									223	0	0	0	0	0	0	0	0	0	0	0	0	0	0	0	0	0	0	0
	224	0	0	0	0	0	0	0	0	0	0	0	0	0	0	0	0	0	0	0	0									224	0	0	0	0	0	0	0	0	0	0	0	0	0	0	0	0	0	0	0
	225	0	0	0	0	0	0	0	0	0	0	0	0	0	0	0	0	0	0	0	0									225	0	0	0	0	0	0	0	0	0	0	0	0	0	0	0	0	0	0	0
	226	0	0	0	0	0	0	0	0	0	0	0	0	0	0	0	0	0	0	0	0									226	0	0	0	0	0	0	0	0	0	0	0	0	0	0	0	0	0	0	0
	227	0	0	0	0	0	0	0	0	0	0	0	0	0	0	0	0	0	0	0	0									227	0	0	0	0	0	0	0	0	0	0	0	0	0	0	0	0	0	0	0
	228	0	0	0	0	0	0	0	0	0	0	0	0	0	0	0	0	0	0	0	0									228	0	0	0	0	0	0	0	0	0	0	0	0	0	0	0	0	0	0	0
	229	0	0	0	0	0	0	0	0	0	0	0	0	0	0	0	0	0	0	0	0									229	0	0	0	0	0	0	0	0	0	0	0	0	0	0	0	0	0	0	0
	230	0	0	0	0	0	0	0	0	0	0	0	0	0	0	0	0	0	0	0	0									230	0	0	0	0	0	0	0	0	0	0	0	0	0	0	0	0	0	0	0
	231	0	0	0	0	0	0	0	0	0	0	0	0	0	0	0	0	0	0	0	0									231	0	0	0	0	0	0	0	0	0	0	0	0	0	0	0	0	0	0	0
	232	0	0	0	0	0	0	0	0	0	0	0	0	0	0	0	0	0	0	0	0									232	0	0	0	0	0	0	0	0	0	0	0	0	0	0	0	0	0	0	0
	233	0	0	0	0	0	0	0	0	0	0	0	0	0	0	0	0	0	0	0	0									233	0	0	0	0	0	0	0	0	0	0	0	0	0	0	0	0	0	0	0
	234	0	0	0	0	0	0	0	0	0	0	0	0	0	0	0	0	0	0	0	0									234	0	0	0	0	0	0	0	0	0	0	0	0	0	0	0	0	0	0	0
	235	0	0	0	0	0	0	0	0	0	0	0	0	0	0	0	0	0	0	0	0									235	0	0	0	0	0	0	0	0	0	0	0	0	0	0	0	0	0	0	0
	236	0	0	0	0	0	0	0	0	0	0	0	0	0	0	0	0	0	0	0	0									236	0	0	0	0	0	0	0	0	0	0	0	0	0	0	0	0	0	0	0
	237	0	0	0	0	0	0	0	0	0	0	0	0	0	0	0	0	0	0	0	0									237	0	0	0	0	0	0	0	0	0	0	0	0	0	0	0	0	0	0	0
	238	0	0	0	0	0	0	0	0	0	0	0	0	0	0	0	0	0	0	0	0									238	0	0	0	0	0	0	0	0	0	0	0	0	0	0	0	0	0	0	0
	239	0	0	0	0	0	0	0	0	0	0	0	0	0	0	0	0	0	0	0	0									239	0	0	0	0	0	0	0	0	0	0	0	0	0	0	0	0	0	0	0
	240	0	0	0	0	0	0	0	0	0	0	0	0	0	0	0	0	0	0	0	0									240	0	0	0	0	0	0	0	0	0	0	0	0	0	0	0	0	0	0	0
	241	0	0	0	0	0	0	0	0	0	0	0	0	0	0	0	0	0	0	0	0									241	0	0	0	0	0	0	0	0	0	0	0	0	0	0	0	0	0	0	0
	242	0	0	0	0	0	0	0	0	0	0	0	0	0	0	0	0	0	0	0	0									242	0	0	0	0	0	0	0	0	0	0	0	0	0	0	0	0	0	0	0
	243	0	0	0	0	0	0	0	0	0	0	0	0	0	0	0	0	0	0	0	0									243	0	0	0	0	0	0	0	0	0	0	0	0	0	0	0	0	0	0	0
	244	0	0	0	0	0	0	0	0	0	0	0	0	0	0	0	0	0	0	0	0									244	0	0	0	0	0	0	0	0	0	0	0	0	0	0	0	0	0	0	0
	245	0	0	0	0	0	0	0	0	0	0	0	0	0	0	0	0	0	0	0	0									245	0	0	0	0	0	0	0	0	0	0	0	0	0	0	0	0	0	0	0
	246	0	0	0	0	0	0	0	0	0	0	0	0	0	0	0	0	0	0	0	0									246	0	0	0	0	0	0	0	0	0	0	0	0	0	0	0	0	0	0	0
	247	0	0	0	0	0	0	0	0	0	0	0	0	0	0	0	0	0	0	0	0									247	0	0	0	0	0	0	0	0	0	0	0	0	0	0	0	0	0	0	0
	248	0	0	0	0	0	0	0	0	0	0	0	0	0	0	0	0	0	0	0	0									248	0	0	0	0	0	0	0	0	0	0	0	0	0	0	0	0	0	0	0
	249	0	0	0	0	0	0	0	0	0	0	0	0	0	0	0	0	0	0	0	0									249	0	0	0	0	0	0	0	0	0	0	0	0	0	0	0	0	0	0	0
	250	0	0	0	0	0	0	0	0	0	0	0	0	0	0	0	0	0	0	0	0									250	0	0	0	0	0	0	0	0	0	0	0	0	0	0	0	0	0	0	0
	251	0	0	0	0	0	0	0	0	0	0	0	0	0	0	0	0	0	0	0	0									251	0	0	0	0	0	0	0	0	0	0	0	0	0	0	0	0	0	0	0
	252	0	0	0	0	0	0	0	0	0	0	0	0	0	0	0	0	0	0	0	0									252	0	0	0	0	0	0	0	0	0	0	0	0	0	0	0	0	0	0	0
	253	0	0	0	0	0	0	0	0	0	0	0	0	0	0	0	0	0	0	0	0									253	0	0	0	0	0	0	0	0	0	0	0	0	0	0	0	0	0	0	0
	254	0	0	0	0	0	0	0	0	0	0	0	0	0	0	0	0	0	0	0	0									254	0	0	0	0	0	0	0	0	0	0	0	0	0	0	0	0	0	0	0
	255	0	0	0	0	0	0	0	0	0	0	0	0	0	0	0	0	0	0	0	0									255	0	0	0	0	0	0	0	0	0	0	0	0	0	0	0	0	0	0	0
	256	0	0	0	0	0	0	0	0	0	0	0	0	0	0	0	0	0	0	0	0									256	0	0	0	0	0	0	0	0	0	0	0	0	0	0	0	0	0	0	0
	257	0	0	0	0	0	0	0	0	0	0	0	0	0	0	0	0	0	0	0	0									257	0	0	0	0	0	0	0	0	0	0	0	0	0	0	0	0	0	0	0
	258	0	0	0	0	0	0	0	0	0	0	0	0	0	0	0	0	0	0	0	0									258	0	0	0	0	0	0	0	0	0	0	0	0	0	0	0	0	0	0	0
	259	0	0	0	0	0	0	0	0	0	0	0	0	0	0	0	0	0	0	0	0									259	0	0	0	0	0	0	0	0	0	0	0	0	0	0	0	0	0	0	0
	260	0	0	0	0	0	0	0	0	0	0	0	0	0	0	0	0	0	0	0	0									260	0	0	0	0	0	0	0	0	0	0	0	0	0	0	0	0	0	0	0
	261	0	0	0	0	0	0	0	0	0	0	0	0	0	0	0	0	0	0	0	0									261	0	0	0	0	0	0	0	0	0	0	0	0	0	0	0	0	0	0	0
	262	0	0	0	0	0	0	0	0	0	0	0	0	0	0	0	0	0	0	0	0									262	0	0	0	0	0	0	0	0	0	0	0	0	0	0	0	0	0	0	0
	263	0	0	0	0	0	0	0	0	0	0	0	0	0	0	0	0	0	0	0	0									263	0	0	0	0	0	0	0	0	0	0	0	0	0	0	0	0	0	0	0
	264	0	0	0	0	0	0	0	0	0	0	0	0	0	0	0	0	0	0	0	0									264	0	0	0	0	0	0	0	0	0	0	0	0	0	0	0	0	0	0	0
	265	0	0	0	0	0	0	0	0	0	0	0	0	0	0	0	0	0	0	0	0									265	0	0	0	0	0	0	0	0	0	0	0	0	0	0	0	0	0	0	0
	266	0	0	0	0	0	0	0	0	0	0	0	0	0	0	0	0	0	0	0	0									266	0	0	0	0	0	0	0	0	0	0	0	0	0	0	0	0	0	0	0
	267	0	0	0	0	0	0	0	0	0	0	0	0	0	0	0	0	0	0	0	0									267	0	0	0	0	0	0	0	0	0	0	0	0	0	0	0	0	0	0	0
	268	0	0	0	0	0	0	0	0	0	0	0	0	0	0	0	0	0	0	0	0									268	0	0	0	0	0	0	0	0	0	0	0	0	0	0	0	0	0	0	0
	269	0	0	0	0	0	0	0	0	0	0	0	0	0	0	0	0	0	0	0	0									269	0	0	0	0	0	0	0	0	0	0	0	0	0	0	0	0	0	0	0
	270	0	0	0	0	0	0	0	0	0	0	0	0	0	0	0	0	0	0	0	0									270	0	0	0	0	0	0	0	0	0	0	0	0	0	0	0	0	0	0	0
	271	0	0	0	0	0	0	0	0	0	0	0	0	0	0	0	0	0	0	0	0									271	0	0	0	0	0	0	0	0	0	0	0	0	0	0	0	0	0	0	0
	272	0	0	0	0	0	0	0	0	0	0	0	0	0	0	0	0	0	0	0	0									272	0	0	0	0	0	0	0	0	0	0	0	0	0	0	0	0	0	0	0
	273	0	0	0	0	0	0	0	0	0	0	0	0	0	0	0	0	0	0	0	0									273	0	0	0	0	0	0	0	0	0	0	0	0	0	0	0	0	0	0	0
	274	0	0	0	0	0	0	0	0	0	0	0	0	0	0	0	0	0	0	0	0									274	0	0	0	0	0	0	0	0	0	0	0	0	0	0	0	0	0	0	0
	275	0	0	0	0	0	0	0	0	0	0	0	0	0	0	0	0	0	0	0	0									275	0	0	0	0	0	0	0	0	0	0	0	0	0	0	0	0	0	0	0
	276	0	0	0	0	0	0	0	0	0	0	0	0	0	0	0	0	0	0	0	0									276	0	0	0	0	0	0	0	0	0	0	0	0	0	0	0	0	0	0	0
	277	0	0	0	0	0	0	0	0	0	0	0	0	0	0	0	0	0	0	0	0									277	0	0	0	0	0	0	0	0	0	0	0	0	0	0	0	0	0	0	0
	278	0	0	0	0	0	0	0	0	0	0	0	0	0	0	0	0	0	0	0	0									278	0	0	0	0	0	0	0	0	0	0	0	0	0	0	0	0	0	0	0
	279	0	0	0	0	0	0	0	0	0	0	0	0	0	0	0	0	0	0	0	0									279	0	0	0	0	0	0	0	0	0	0	0	0	0	0	0	0	0	0	0
	280	0	0	0	0	0	0	0	0	0	0	0	0	0	0	0	0	0	0	0	0									280	0	0	0	0	0	0	0	0	0	0	0	0	0	0	0	0	0	0	0
	281	0	0	0	0	0	0	0	0	0	0	0	0	0	0	0	0	0	0	0	0									281	0	0	0	0	0	0	0	0	0	0	0	0	0	0	0	0	0	0	0
	282	0	0	0	0	0	0	0	0	0	0	0	0	0	0	0	0	0	0	0	0									282	0	0	0	0	0	0	0	0	0	0	0	0	0	0	0	0	0	0	0
	283	0	0	0	0	0	0	0	0	0	0	0	0	0	0	0	0	0	0	0	0									283	0	0	0	0	0	0	0	0	0	0	0	0	0	0	0	0	0	0	0
	284	0	0	0	0	0	0	0	0	0	0	0	0	0	0	0	0	0	0	0	0									284	0	0	0	0	0	0	0	0	0	0	0	0	0	0	0	0	0	0	0
	285	0	0	0	0	0	0	0	0	0	0	0	0	0	0	0	0	0	0	0	0									285	0	0	0	0	0	0	0	0	0	0	0	0	0	0	0	0	0	0	0
	286	0	0	0	0	0	0	0	0	0	0	0	0	0	0	0	0	0	0	0	0									286	0	0	0	0	0	0	0	0	0	0	0	0	0	0	0	0	0	0	0
	287	0	0	0	0	0	0	0	0	0	0	0	0	0	0	0	0	0	0	0	0									287	0	0	0	0	0	0	0	0	0	0	0	0	0	0	0	0	0	0	0
	288	0	0	0	0	0	0	0	0	0	0	0	0	0	0	0	0	0	0	0	0									288	0	0	0	0	0	0	0	0	0	0	0	0	0	0	0	0	0	0	0
	289	0	0	0	0	0	0	0	0	0	0	0	0	0	0	0	0	0	0	0	0									289	0	0	0	0	0	0	0	0	0	0	0	0	0	0	0	0	0	0	0
	290	0	0	0	0	0	0	0	0	0	0	0	0	0	0	0	0	0	0	0	0									290	0	0	0	0	0	0	0	0	0	0	0	0	0	0	0	0	0	0	0
	291	0	0	0	0	0	0	0	0	0	0	0	0	0	0	0	0	0	0	0	0									291	0	0	0	0	0	0	0	0	0	0	0	0	0	0	0	0	0	0	0
	292	0	0	0	0	0	0	0	0	0	0	0	0	0	0	0	0	0	0	0	0									292	0	0	0	0	0	0	0	0	0	0	0	0	0	0	0	0	0	0	0
	293	0	0	0	0	0	0	0	0	0	0	0	0	0	0	0	0	0	0	0	0									293	0	0	0	0	0	0	0	0	0	0	0	0	0	0	0	0	0	0	0
	294	0	0	0	0	0	0	0	0	0	0	0	0	0	0	0	0	0	0	0	0									294	0	0	0	0	0	0	0	0	0	0	0	0	0	0	0	0	0	0	0
	295	0	0	0	0	0	0	0	0	0	0	0	0	0	0	0	0	0	0	0	0									295	0	0	0	0	0	0	0	0	0	0	0	0	0	0	0	0	0	0	0
	296	0	0	0	0	0	0	0	0	0	0	0	0	0	0	0	0	0	0	0	0									296	0	0	0	0	0	0	0	0	0	0	0	0	0	0	0	0	0	0	0
	297	0	0	0	0	0	0	0	0	0	0	0	0	0	0	0	0	0	0	0	0									297	0	0	0	0	0	0	0	0	0	0	0	0	0	0	0	0	0	0	0
	298	0	0	0	0	0	0	0	0	0	0	0	0	0	0	0	0	0	0	0	0									298	0	0	0	0	0	0	0	0	0	0	0	0	0	0	0	0	0	0	0
	299	0	0	0	0	0	0	0	0	0	0	0	0	0	0	0	0	0	0	0	0									299	0	0	0	0	0	0	0	0	0	0	0	0	0	0	0	0	0	0	0
	300	0	0	0	0	0	0	0	0	0	0	0	0	0	0	0	0	0	0	0	0									300	0	0	0	0	0	0	0	0	0	0	0	0	0	0	0	0	0	0	0
	301	0	0	0	0	0	0	0	0	0	0	0	0	0	0	0	0	0	0	0	0									301	0	0	0	0	0	0	0	0	0	0	0	0	0	0	0	0	0	0	0
	302	0	0	0	0	0	0	0	0	0	0	0	0	0	0	0	0	0	0	0	0									302	0	0	0	0	0	0	0	0	0	0	0	0	0	0	0	0	0	0	0
	303	0	0	0	0	0	0	0	0	0	0	0	0	0	0	0	0	0	0	0	0									303	0	0	0	0	0	0	0	0	0	0	0	0	0	0	0	0	0	0	0
	304	0	0	0	0	0	0	0	0	0	0	0	0	0	0	0	0	0	0	0	0									304	0	0	0	0	0	0	0	0	0	0	0	0	0	0	0	0	0	0	0
	305	0	0	0	0	0	0	0	0	0	0	0	0	0	0	0	0	0	0	0	0									305	0	0	0	0	0	0	0	0	0	0	0	0	0	0	0	0	0	0	0
	306	0	0	0	0	0	0	0	0	0	0	0	0	0	0	0	0	0	0	0	0									306	0	0	0	0	0	0	0	0	0	0	0	0	0	0	0	0	0	0	0
	307	0	0	0	0	0	0	0	0	0	0	0	0	0	0	0	0	0	0	0	0									307	0	0	0	0	0	0	0	0	0	0	0	0	0	0	0	0	0	0	0
	308	0	0	0	0	0	0	0	0	0	0	0	0	0	0	0	0	0	0	0	0									308	0	0	0	0	0	0	0	0	0	0	0	0	0	0	0	0	0	0	0
	309	0	0	0	0	0	0	0	0	0	0	0	0	0	0	0	0	0	0	0	0									309	0	0	0	0	0	0	0	0	0	0	0	0	0	0	0	0	0	0	0
	310	0	0	0	0	0	0	0	0	0	0	0	0	0	0	0	0	0	0	0	0									310	0	0	0	0	0	0	0	0	0	0	0	0	0	0	0	0	0	0	0
	311	0	0	0	0	0	0	0	0	0	0	0	0	0	0	0	0	0	0	0	0									311	0	0	0	0	0	0	0	0	0	0	0	0	0	0	0	0	0	0	0
	312	0	0	0	0	0	0	0	0	0	0	0	0	0	0	0	0	0	0	0	0									312	0	0	0	0	0	0	0	0	0	0	0	0	0	0	0	0	0	0	0
	313	0	0	0	0	0	0	0	0	0	0	0	0	0	0	0	0	0	0	0	0									313	0	0	0	0	0	0	0	0	0	0	0	0	0	0	0	0	0	0	0
	314	0	0	0	0	0	0	0	0	0	0	0	0	0	0	0	0	0	0	0	0									314	0	0	0	0	0	0	0	0	0	0	0	0	0	0	0	0	0	0	0
	315	0	0	0	0	0	0	0	0	0	0	0	0	0	0	0	0	0	0	0	0									315	0	0	0	0	0	0	0	0	0	0	0	0	0	0	0	0	0	0	0
	316	0	0	0	0	0	0	0	0	0	0	0	0	0	0	0	0	0	0	0	0									316	0	0	0	0	0	0	0	0	0	0	0	0	0	0	0	0	0	0	0
	317	0	0	0	0	0	0	0	0	0	0	0	0	0	0	0	0	0	0	0	0									317	0	0	0	0	0	0	0	0	0	0	0	0	0	0	0	0	0	0	0
	318	0	0	0	0	0	0	0	0	0	0	0	0	0	0	0	0	0	0	0	0									318	0	0	0	0	0	0	0	0	0	0	0	0	0	0	0	0	0	0	0
	319	0	0	0	0	0	0	0	0	0	0	0	0	0	0	0	0	0	0	0	0									319	0	0	0	0	0	0	0	0	0	0	0	0	0	0	0	0	0	0	0
	320	0	0	0	0	0	0	0	0	0	0	0	0	0	0	0	0	0	0	0	0									320	0	0	0	0	0	0	0	0	0	0	0	0	0	0	0	0	0	0	0
	321	0	0	0	0	0	0	0	0	0	0	0	0	0	0	0	0	0	0	0	0									321	0	0	0	0	0	0	0	0	0	0	0	0	0	0	0	0	0	0	0
	322	0	0	0	0	0	0	0	0	0	0	0	0	0	0	0	0	0	0	0	0									322	0	0	0	0	0	0	0	0	0	0	0	0	0	0	0	0	0	0	0
	323	0	0	0	0	0	0	0	0	0	0	0	0	0	0	0	0	0	0	0	0									323	0	0	0	0	0	0	0	0	0	0	0	0	0	0	0	0	0	0	0
	324	0	0	0	0	0	0	0	0	0	0	0	0	0	0	0	0	0	0	0	0									324	0	0	0	0	0	0	0	0	0	0	0	0	0	0	0	0	0	0	0
	325	0	0	0	0	0	0	0	0	0	0	0	0	0	0	0	0	0	0	0	0									325	0	0	0	0	0	0	0	0	0	0	0	0	0	0	0	0	0	0	0
	326	0	0	0	0	0	0	0	0	0	0	0	0	0	0	0	0	0	0	0	0									326	0	0	0	0	0	0	0	0	0	0	0	0	0	0	0	0	0	0	0
	327	0	0	0	0	0	0	0	0	0	0	0	0	0	0	0	0	0	0	0	0									327	0	0	0	0	0	0	0	0	0	0	0	0	0	0	0	0	0	0	0
	328	0	0	0	0	0	0	0	0	0	0	0	0	0	0	0	0	0	0	0	0									328	0	0	0	0	0	0	0	0	0	0	0	0	0	0	0	0	0	0	0
	329	0	0	0	0	0	0	0	0	0	0	0	0	0	0	0	0	0	0	0	0									329	0	0	0	0	0	0	0	0	0	0	0	0	0	0	0	0	0	0	0
	330	0	0	0	0	0	0	0	0	0	0	0	0	0	0	0	0	0	0	0	0									330	0	0	0	0	0	0	0	0	0	0	0	0	0	0	0	0	0	0	0
	331	0	0	0	0	0	0	0	0	0	0	0	0	0	0	0	0	0	0	0	0									331	0	0	0	0	0	0	0	0	0	0	0	0	0	0	0	0	0	0	0
	332	0	0	0	0	0	0	0	0	0	0	0	0	0	0	0	0	0	0	0	0									332	0	0	0	0	0	0	0	0	0	0	0	0	0	0	0	0	0	0	0
	333	0	0	0	0	0	0	0	0	0	0	0	0	0	0	0	0	0	0	0	0									333	0	0	0	0	0	0	0	0	0	0	0	0	0	0	0	0	0	0	0
	334	0	0	0	0	0	0	0	0	0	0	0	0	0	0	0	0	0	0	0	0									334	0	0	0	0	0	0	0	0	0	0	0	0	0	0	0	0	0	0	0
	335	0	0	0	0	0	0	0	0	0	0	0	0	0	0	0	0	0	0	0	0									335	0	0	0	0	0	0	0	0	0	0	0	0	0	0	0	0	0	0	0
	336	0	0	0	0	0	0	0	0	0	0	0	0	0	0	0	0	0	0	0	0									336	0	0	0	0	0	0	0	0	0	0	0	0	0	0	0	0	0	0	0
	337	0	0	0	0	0	0	0	0	0	0	0	0	0	0	0	0	0	0	0	0									337	0	0	0	0	0	0	0	0	0	0	0	0	0	0	0	0	0	0	0
	338	0	0	0	0	0	0	0	0	0	0	0	0	0	0	0	0	0	0	0	0									338	0	0	0	0	0	0	0	0	0	0	0	0	0	0	0	0	0	0	0
	339	0	0	0	0	0	0	0	0	0	0	0	0	0	0	0	0	0	0	0	0									339	0	0	0	0	0	0	0	0	0	0	0	0	0	0	0	0	0	0	0
	340	0	0	0	0	0	0	0	0	0	0	0	0	0	0	0	0	0	0	0	0									340	0	0	0	0	0	0	0	0	0	0	0	0	0	0	0	0	0	0	0
	341	0	0	0	0	0	0	0	0	0	0	0	0	0	0	0	0	0	0	0	0									341	0	0	0	0	0	0	0	0	0	0	0	0	0	0	0	0	0	0	0
	342	0	0	0	0	0	0	0	0	0	0	0	0	0	0	0	0	0	0	0	0									342	0	0	0	0	0	0	0	0	0	0	0	0	0	0	0	0	0	0	0
	343	0	0	0	0	0	0	0	0	0	0	0	0	0	0	0	0	0	0	0	0									343	0	0	0	0	0	0	0	0	0	0	0	0	0	0	0	0	0	0	0
	344	0	0	0	0	0	0	0	0	0	0	0	0	0	0	0	0	0	0	0	0									344	0	0	0	0	0	0	0	0	0	0	0	0	0	0	0	0	0	0	0
	345	0	0	0	0	0	0	0	0	0	0	0	0	0	0	0	0	0	0	0	0									345	0	0	0	0	0	0	0	0	0	0	0	0	0	0	0	0	0	0	0
	346	0	0	0	0	0	0	0	0	0	0	0	0	0	0	0	0	0	0	0	0									346	0	0	0	0	0	0	0	0	0	0	0	0	0	0	0	0	0	0	0
	347	0	0	0	0	0	0	0	0	0	0	0	0	0	0	0	0	0	0	0	0									347	0	0	0	0	0	0	0	0	0	0	0	0	0	0	0	0	0	0	0
	348	0	0	0	0	0	0	0	0	0	0	0	0	0	0	0	0	0	0	0	0									348	0	0	0	0	0	0	0	0	0	0	0	0	0	0	0	0	0	0	0
	349	0	0	0	0	0	0	0	0	0	0	0	0	0	0	0	0	0	0	0	0									349	0	0	0	0	0	0	0	0	0	0	0	0	0	0	0	0	0	0	0
	350	0	0	0	0	0	0	0	0	0	0	0	0	0	0	0	0	0	0	0	0									350	0	0	0	0	0	0	0	0	0	0	0	0	0	0	0	0	0	0	0
	351	0	0	0	0	0	0	0	0	0	0	0	0	0	0	0	0	0	0	0	0									351	0	0	0	0	0	0	0	0	0	0	0	0	0	0	0	0	0	0	0
	352	0	0	0	0	0	0	0	0	0	0	0	0	0	0	0	0	0	0	0	0									352	0	0	0	0	0	0	0	0	0	0	0	0	0	0	0	0	0	0	0
	353	0	0	0	0	0	0	0	0	0	0	0	0	0	0	0	0	0	0	0	0									353	0	0	0	0	0	0	0	0	0	0	0	0	0	0	0	0	0	0	0
	354	0	0	0	0	0	0	0	0	0	0	0	0	0	0	0	0	0	0	0	0									354	0	0	0	0	0	0	0	0	0	0	0	0	0	0	0	0	0	0	0
	355	0	0	0	0	0	0	0	0	0	0	0	0	0	0	0	0	0	0	0	0									355	0	0	0	0	0	0	0	0	0	0	0	0	0	0	0	0	0	0	0
	356	0	0	0	0	0	0	0	0	0	0	0	0	0	0	0	0	0	0	0	0									356	0	0	0	0	0	0	0	0	0	0	0	0	0	0	0	0	0	0	0
	357	0	0	0	0	0	0	0	0	0	0	0	0	0	0	0	0	0	0	0	0									357	0	0	0	0	0	0	0	0	0	0	0	0	0	0	0	0	0	0	0
	358	0	0	0	0	0	0	0	0	0	0	0	0	0	0	0	0	0	0	0	0									358	0	0	0	0	0	0	0	0	0	0	0	0	0	0	0	0	0	0	0
	359	0	0	0	0	0	0	0	0	0	0	0	0	0	0	0	0	0	0	0	0									359	0	0	0	0	0	0	0	0	0	0	0	0	0	0	0	0	0	0	0
	360	0	0	0	0	0	0	0	0	0	0	0	0	0	0	0	0	0	0	0	0									360	0	0	0	0	0	0	0	0	0	0	0	0	0	0	0	0	0	0	0
	361	0	0	0	0	0	0	0	0	0	0	0	0	0	0	0	0	0	0	0	0									361	0	0	0	0	0	0	0	0	0	0	0	0	0	0	0	0	0	0	0
	362	0	0	0	0	0	0	0	0	0	0	0	0	0	0	0	0	0	0	0	0									362	0	0	0	0	0	0	0	0	0	0	0	0	0	0	0	0	0	0	0
	363	0	0	0	0	0	0	0	0	0	0	0	0	0	0	0	0	0	0	0	0									363	0	0	0	0	0	0	0	0	0	0	0	0	0	0	0	0	0	0	0
	364	0	0	0	0	0	0	0	0	0	0	0	0	0	0	0	0	0	0	0	0									364	0	0	0	0	0	0	0	0	0	0	0	0	0	0	0	0	0	0	0
	365	0	0	0	0	0	0	0	0	0	0	0	0	0	0	0	0	0	0	0	0									365	0	0	0	0	0	0	0	0	0	0	0	0	0	0	0	0	0	0	0
	366	0	0	0	0	0	0	0	0	0	0	0	0	0	0	0	0	0	0	0	0									366	0	0	0	0	0	0	0	0	0	0	0	0	0	0	0	0	0	0	0
	367	0	0	0	0	0	0	0	0	0	0	0	0	0	0	0	0	0	0	0	0									367	0	0	0	0	0	0	0	0	0	0	0	0	0	0	0	0	0	0	0
	368	0	0	0	0	0	0	0	0	0	0	0	0	0	0	0	0	0	0	0	0									368	0	0	0	0	0	0	0	0	0	0	0	0	0	0	0	0	0	0	0
	369	0	0	0	0	0	0	0	0	0	0	0	0	0	0	0	0	0	0	0	0									369	0	0	0	0	0	0	0	0	0	0	0	0	0	0	0	0	0	0	0
	370	0	0	0	0	0	0	0	0	0	0	0	0	0	0	0	0	0	0	0	0									370	0	0	0	0	0	0	0	0	0	0	0	0	0	0	0	0	0	0	0
	371	0	0	0	0	0	0	0	0	0	0	0	0	0	0	0	0	0	0	0	0									371	0	0	0	0	0	0	0	0	0	0	0	0	0	0	0	0	0	0	0
	372	0	0	0	0	0	0	0	0	0	0	0	0	0	0	0	0	0	0	0	0									372	0	0	0	0	0	0	0	0	0	0	0	0	0	0	0	0	0	0	0
	373	0	0	0	0	0	0	0	0	0	0	0	0	0	0	0	0	0	0	0	0									373	0	0	0	0	0	0	0	0	0	0	0	0	0	0	0	0	0	0	0
	374	0	0	0	0	0	0	0	0	0	0	0	0	0	0	0	0	0	0	0	0									374	0	0	0	0	0	0	0	0	0	0	0	0	0	0	0	0	0	0	0
	375	0	0	0	0	0	0	0	0	0	0	0	0	0	0	0	0	0	0	0	0									375	0	0	0	0	0	0	0	0	0	0	0	0	0	0	0	0	0	0	0
	376	0	0	0	0	0	0	0	0	0	0	0	0	0	0	0	0	0	0	0	0									376	0	0	0	0	0	0	0	0	0	0	0	0	0	0	0	0	0	0	0
	377	0	0	0	0	0	0	0	0	0	0	0	0	0	0	0	0	0	0	0	0									377	0	0	0	0	0	0	0	0	0	0	0	0	0	0	0	0	0	0	0
	378	0	0	0	0	0	0	0	0	0	0	0	0	0	0	0	0	0	0	0	0									378	0	0	0	0	0	0	0	0	0	0	0	0	0	0	0	0	0	0	0
	379	0	0	0	0	0	0	0	0	0	0	0	0	0	0	0	0	0	0	0	0									379	0	0	0	0	0	0	0	0	0	0	0	0	0	0	0	0	0	0	0
	380	0	0	0	0	0	0	0	0	0	0	0	0	0	0	0	0	0	0	0	0									380	0	0	0	0	0	0	0	0	0	0	0	0	0	0	0	0	0	0	0
	381	0	0	0	0	0	0	0	0	0	0	0	0	0	0	0	0	0	0	0	0									381	0	0	0	0	0	0	0	0	0	0	0	0	0	0	0	0	0	0	0
	382	0	0	0	0	0	0	0	0	0	0	0	0	0	0	0	0	0	0	0	0									382	0	0	0	0	0	0	0	0	0	0	0	0	0	0	0	0	0	0	0
	383	0	0	0	0	0	0	0	0	0	0	0	0	0	0	0	0	0	0	0	0									383	0	0	0	0	0	0	0	0	0	0	0	0	0	0	0	0	0	0	0
	384	0	0	0	0	0	0	0	0	0	0	0	0	0	0	0	0	0	0	0	0									384	0	0	0	0	0	0	0	0	0	0	0	0	0	0	0	0	0	0	0
	385	0	0	0	0	0	0	0	0	0	0	0	0	0	0	0	0	0	0	0	0									385	0	0	0	0	0	0	0	0	0	0	0	0	0	0	0	0	0	0	0
	386	0	0	0	0	0	0	0	0	0	0	0	0	0	0	0	0	0	0	0	0									386	0	0	0	0	0	0	0	0	0	0	0	0	0	0	0	0	0	0	0
	387	0	0	0	0	0	0	0	0	0	0	0	0	0	0	0	0	0	0	0	0									387	0	0	0	0	0	0	0	0	0	0	0	0	0	0	0	0	0	0	0
	388	0	0	0	0	0	0	0	0	0	0	0	0	0	0	0	0	0	0	0	0									388	0	0	0	0	0	0	0	0	0	0	0	0	0	0	0	0	0	0	0
	389	0	0	0	0	0	0	0	0	0	0	0	0	0	0	0	0	0	0	0	0									389	0	0	0	0	0	0	0	0	0	0	0	0	0	0	0	0	0	0	0
	390	0	0	0	0	0	0	0	0	0	0	0	0	0	0	0	0	0	0	0	0									390	0	0	0	0	0	0	0	0	0	0	0	0	0	0	0	0	0	0	0
	391	0	0	0	0	0	0	0	0	0	0	0	0	0	0	0	0	0	0	0	0									391	0	0	0	0	0	0	0	0	0	0	0	0	0	0	0	0	0	0	0
	392	0	0	0	0	0	0	0	0	0	0	0	0	0	0	0	0	0	0	0	0									392	0	0	0	0	0	0	0	0	0	0	0	0	0	0	0	0	0	0	0
	393	0	0	0	0	0	0	0	0	0	0	0	0	0	0	0	0	0	0	0	0									393	0	0	0	0	0	0	0	0	0	0	0	0	0	0	0	0	0	0	0
	394	0	0	0	0	0	0	0	0	0	0	0	0	0	0	0	0	0	0	0	0									394	0	0	0	0	0	0	0	0	0	0	0	0	0	0	0	0	0	0	0
	395	0	0	0	0	0	0	0	0	0	0	0	0	0	0	0	0	0	0	0	0									395	0	0	0	0	0	0	0	0	0	0	0	0	0	0	0	0	0	0	0
	396	0	0	0	0	0	0	0	0	0	0	0	0	0	0	0	0	0	0	0	0									396	0	0	0	0	0	0	0	0	0	0	0	0	0	0	0	0	0	0	0
	397	0	0	0	0	0	0	0	0	0	0	0	0	0	0	0	0	0	0	0	0									397	0	0	0	0	0	0	0	0	0	0	0	0	0	0	0	0	0	0	0
	398	0	0	0	0	0	0	0	0	0	0	0	0	0	0	0	0	0	0	0	0									398	0	0	0	0	0	0	0	0	0	0	0	0	0	0	0	0	0	0	0
	399	0	0	0	0	0	0	0	0	0	0	0	0	0	0	0	0	0	0	0	0									399	0	0	0	0	0	0	0	0	0	0	0	0	0	0	0	0	0	0	0
	400	0	0	0	0	0	0	0	0	0	0	0	0	0	0	0	0	0	0	0	0									400	0	0	0	0	0	0	0	0	0	0	0	0	0	0	0	0	0	0	0
	401	0	0	0	0	0	0	0	0	0	0	0	0	0	0	0	0	0	0	0	0									401	0	0	0	0	0	0	0	0	0	0	0	0	0	0	0	0	0	0	0
	402	0	0	0	0	0	0	0	0	0	0	0	0	0	0	0	0	0	0	0	0									402	0	0	0	0	0	0	0	0	0	0	0	0	0	0	0	0	0	0	0
	403	0	0	0	0	0	0	0	0	0	0	0	0	0	0	0	0	0	0	0	0									403	0	0	0	0	0	0	0	0	0	0	0	0	0	0	0	0	0	0	0
	404	0	0	0	0	0	0	0	0	0	0	0	0	0	0	0	0	0	0	0	0									404	0	0	0	0	0	0	0	0	0	0	0	0	0	0	0	0	0	0	0
	405	0	0	0	0	0	0	0	0	0	0	0	0	0	0	0	0	0	0	0	0									405	0	0	0	0	0	0	0	0	0	0	0	0	0	0	0	0	0	0	0
	406	0	0	0	0	0	0	0	0	0	0	0	0	0	0	0	0	0	0	0	0									406	0	0	0	0	0	0	0	0	0	0	0	0	0	0	0	0	0	0	0
	407	0	0	0	0	0	0	0	0	0	0	0	0	0	0	0	0	0	0	0	0									407	0	0	0	0	0	0	0	0	0	0	0	0	0	0	0	0	0	0	0
	408	0	0	0	0	0	0	0	0	0	0	0	0	0	0	0	0	0	0	0	0									408	0	0	0	0	0	0	0	0	0	0	0	0	0	0	0	0	0	0	0
	409	0	0	0	0	0	0	0	0	0	0	0	0	0	0	0	0	0	0	0	0									409	0	0	0	0	0	0	0	0	0	0	0	0	0	0	0	0	0	0	0
	410	0	0	0	0	0	0	0	0	0	0	0	0	0	0	0	0	0	0	0	0									410	0	0	0	0	0	0	0	0	0	0	0	0	0	0	0	0	0	0	0
	411	0	0	0	0	0	0	0	0	0	0	0	0	0	0	0	0	0	0	0	0									411	0	0	0	0	0	0	0	0	0	0	0	0	0	0	0	0	0	0	0
	412	0	0	0	0	0	0	0	0	0	0	0	0	0	0	0	0	0	0	0	0									412	0	0	0	0	0	0	0	0	0	0	0	0	0	0	0	0	0	0	0
	413	0	0	0	0	0	0	0	0	0	0	0	0	0	0	0	0	0	0	0	0									413	0	0	0	0	0	0	0	0	0	0	0	0	0	0	0	0	0	0	0
	414	0	0	0	0	0	0	0	0	0	0	0	0	0	0	0	0	0	0	0	0									414	0	0	0	0	0	0	0	0	0	0	0	0	0	0	0	0	0	0	0
	415	0	0	0	0	0	0	0	0	0	0	0	0	0	0	0	0	0	0	0	0									415	0	0	0	0	0	0	0	0	0	0	0	0	0	0	0	0	0	0	0
	416	0	0	0	0	0	0	0	0	0	0	0	0	0	0	0	0	0	0	0	0									416	0	0	0	0	0	0	0	0	0	0	0	0	0	0	0	0	0	0	0
	417	0	0	0	0	0	0	0	0	0	0	0	0	0	0	0	0	0	0	0	0									417	0	0	0	0	0	0	0	0	0	0	0	0	0	0	0	0	0	0	0
	418	0	0	0	0	0	0	0	0	0	0	0	0	0	0	0	0	0	0	0	0									418	0	0	0	0	0	0	0	0	0	0	0	0	0	0	0	0	0	0	0
	419	0	0	0	0	0	0	0	0	0	0	0	0	0	0	0	0	0	0	0	0									419	0	0	0	0	0	0	0	0	0	0	0	0	0	0	0	0	0	0	0
	420	0	0	0	0	0	0	0	0	0	0	0	0	0	0	0	0	0	0	0	0									420	0	0	0	0	0	0	0	0	0	0	0	0	0	0	0	0	0	0	0
	421	0	0	0	0	0	0	0	0	0	0	0	0	0	0	0	0	0	0	0	0									421	0	0	0	0	0	0	0	0	0	0	0	0	0	0	0	0	0	0	0
	422	0	0	0	0	0	0	0	0	0	0	0	0	0	0	0	0	0	0	0	0									422	0	0	0	0	0	0	0	0	0	0	0	0	0	0	0	0	0	0	0
	423	0	0	0	0	0	0	0	0	0	0	0	0	0	0	0	0	0	0	0	0									423	0	0	0	0	0	0	0	0	0	0	0	0	0	0	0	0	0	0	0
	424	0	0	0	0	0	0	0	0	0	0	0	0	0	0	0	0	0	0	0	0									424	0	0	0	0	0	0	0	0	0	0	0	0	0	0	0	0	0	0	0
	425	0	0	0	0	0	0	0	0	0	0	0	0	0	0	0	0	0	0	0	0									425	0	0	0	0	0	0	0	0	0	0	0	0	0	0	0	0	0	0	0
	426	0	0	0	0	0	0	0	0	0	0	0	0	0	0	0	0	0	0	0	0									426	0	0	0	0	0	0	0	0	0	0	0	0	0	0	0	0	0	0	0
	427	0	0	0	0	0	0	0	0	0	0	0	0	0	0	0	0	0	0	0	0									427	0	0	0	0	0	0	0	0	0	0	0	0	0	0	0	0	0	0	0
	428	0	0	0	0	0	0	0	0	0	0	0	0	0	0	0	0	0	0	0	0									428	0	0	0	0	0	0	0	0	0	0	0	0	0	0	0	0	0	0	0
	429	0	0	0	0	0	0	0	0	0	0	0	0	0	0	0	0	0	0	0	0									429	0	0	0	0	0	0	0	0	0	0	0	0	0	0	0	0	0	0	0
	430	0	0	0	0	0	0	0	0	0	0	0	0	0	0	0	0	0	0	0	0									430	0	0	0	0	0	0	0	0	0	0	0	0	0	0	0	0	0	0	0
	431	0	0	0	0	0	0	0	0	0	0	0	0	0	0	0	0	0	0	0	0									431	0	0	0	0	0	0	0	0	0	0	0	0	0	0	0	0	0	0	0
	432	0	0	0	0	0	0	0	0	0	0	0	0	0	0	0	0	0	0	0	0									432	0	0	0	0	0	0	0	0	0	0	0	0	0	0	0	0	0	0	0
	433	0	0	0	0	0	0	0	0	0	0	0	0	0	0	0	0	0	0	0	0									433	0	0	0	0	0	0	0	0	0	0	0	0	0	0	0	0	0	0	0
	434	0	0	0	0	0	0	0	0	0	0	0	0	0	0	0	0	0	0	0	0									434	0	0	0	0	0	0	0	0	0	0	0	0	0	0	0	0	0	0	0
	435	0	0	0	0	0	0	0	0	0	0	0	0	0	0	0	0	0	0	0	0									435	0	0	0	0	0	0	0	0	0	0	0	0	0	0	0	0	0	0	0
	436	0	0	0	0	0	0	0	0	0	0	0	0	0	0	0	0	0	0	0	0									436	0	0	0	0	0	0	0	0	0	0	0	0	0	0	0	0	0	0	0
	437	0	0	0	0	0	0	0	0	0	0	0	0	0	0	0	0	0	0	0	0									437	0	0	0	0	0	0	0	0	0	0	0	0	0	0	0	0	0	0	0
	438	0	0	0	0	0	0	0	0	0	0	0	0	0	0	0	0	0	0	0	0									438	0	0	0	0	0	0	0	0	0	0	0	0	0	0	0	0	0	0	0
	439	0	0	0	0	0	0	0	0	0	0	0	0	0	0	0	0	0	0	0	0									439	0	0	0	0	0	0	0	0	0	0	0	0	0	0	0	0	0	0	0
	440	0	0	0	0	0	0	0	0	0	0	0	0	0	0	0	0	0	0	0	0									440	0	0	0	0	0	0	0	0	0	0	0	0	0	0	0	0	0	0	0
	441	0	0	0	0	0	0	0	0	0	0	0	0	0	0	0	0	0	0	0	0									441	0	0	0	0	0	0	0	0	0	0	0	0	0	0	0	0	0	0	0
	442	0	0	0	0	0	0	0	0	0	0	0	0	0	0	0	0	0	0	0	0									442	0	0	0	0	0	0	0	0	0	0	0	0	0	0	0	0	0	0	0
	443	0	0	0	0	0	0	0	0	0	0	0	0	0	0	0	0	0	0	0	0									443	0	0	0	0	0	0	0	0	0	0	0	0	0	0	0	0	0	0	0
	444	0	0	0	0	0	0	0	0	0	0	0	0	0	0	0	0	0	0	0	0									444	0	0	0	0	0	0	0	0	0	0	0	0	0	0	0	0	0	0	0
	445	0	0	0	0	0	0	0	0	0	0	0	0	0	0	0	0	0	0	0	0									445	0	0	0	0	0	0	0	0	0	0	0	0	0	0	0	0	0	0	0
	446	0	0	0	0	0	0	0	0	0	0	0	0	0	0	0	0	0	0	0	0									446	0	0	0	0	0	0	0	0	0	0	0	0	0	0	0	0	0	0	0
	447	0	0	0	0	0	0	0	0	0	0	0	0	0	0	0	0	0	0	0	0									447	0	0	0	0	0	0	0	0	0	0	0	0	0	0	0	0	0	0	0
	448	0	0	0	0	0	0	0	0	0	0	0	0	0	0	0	0	0	0	0	0									448	0	0	0	0	0	0	0	0	0	0	0	0	0	0	0	0	0	0	0
	449	0	0	0	0	0	0	0	0	0	0	0	0	0	0	0	0	0	0	0	0									449	0	0	0	0	0	0	0	0	0	0	0	0	0	0	0	0	0	0	0
	450	0	0	0	0	0	0	0	0	0	0	0	0	0	0	0	0	0	0	0	0									450	0	0	0	0	0	0	0	0	0	0	0	0	0	0	0	0	0	0	0
	451	0	0	0	0	0	0	0	0	0	0	0	0	0	0	0	0	0	0	0	0									451	0	0	0	0	0	0	0	0	0	0	0	0	0	0	0	0	0	0	0
	452	0	0	0	0	0	0	0	0	0	0	0	0	0	0	0	0	0	0	0	0									452	0	0	0	0	0	0	0	0	0	0	0	0	0	0	0	0	0	0	0
	453	0	0	0	0	0	0	0	0	0	0	0	0	0	0	0	0	0	0	0	0									453	0	0	0	0	0	0	0	0	0	0	0	0	0	0	0	0	0	0	0
	454	0	0	0	0	0	0	0	0	0	0	0	0	0	0	0	0	0	0	0	0									454	0	0	0	0	0	0	0	0	0	0	0	0	0	0	0	0	0	0	0
	455	0	0	0	0	0	0	0	0	0	0	0	0	0	0	0	0	0	0	0	0									455	0	0	0	0	0	0	0	0	0	0	0	0	0	0	0	0	0	0	0
	456	0	0	0	0	0	0	0	0	0	0	0	0	0	0	0	0	0	0	0	0									456	0	0	0	0	0	0	0	0	0	0	0	0	0	0	0	0	0	0	0
	457	0	0	0	0	0	0	0	0	0	0	0	0	0	0	0	0	0	0	0	0									457	0	0	0	0	0	0	0	0	0	0	0	0	0	0	0	0	0	0	0
	458	0	0	0	0	0	0	0	0	0	0	0	0	0	0	0	0	0	0	0	0									458	0	0	0	0	0	0	0	0	0	0	0	0	0	0	0	0	0	0	0
	459	0	0	0	0	0	0	0	0	0	0	0	0	0	0	0	0	0	0	0	0									459	0	0	0	0	0	0	0	0	0	0	0	0	0	0	0	0	0	0	0
	460	0	0	0	0	0	0	0	0	0	0	0	0	0	0	0	0	0	0	0	0									460	0	0	0	0	0	0	0	0	0	0	0	0	0	0	0	0	0	0	0
	461	0	0	0	0	0	0	0	0	0	0	0	0	0	0	0	0	0	0	0	0									461	0	0	0	0	0	0	0	0	0	0	0	0	0	0	0	0	0	0	0
	462	0	0	0	0	0	0	0	0	0	0	0	0	0	0	0	0	0	0	0	0									462	0	0	0	0	0	0	0	0	0	0	0	0	0	0	0	0	0	0	0
	463	0	0	0	0	0	0	0	0	0	0	0	0	0	0	0	0	0	0	0	0									463	0	0	0	0	0	0	0	0	0	0	0	0	0	0	0	0	0	0	0
	464	0	0	0	0	0	0	0	0	0	0	0	0	0	0	0	0	0	0	0	0									464	0	0	0	0	0	0	0	0	0	0	0	0	0	0	0	0	0	0	0
	465	0	0	0	0	0	0	0	0	0	0	0	0	0	0	0	0	0	0	0	0									465	0	0	0	0	0	0	0	0	0	0	0	0	0	0	0	0	0	0	0
	466	0	0	0	0	0	0	0	0	0	0	0	0	0	0	0	0	0	0	0	0									466	0	0	0	0	0	0	0	0	0	0	0	0	0	0	0	0	0	0	0
	467	0	0	0	0	0	0	0	0	0	0	0	0	0	0	0	0	0	0	0	0									467	0	0	0	0	0	0	0	0	0	0	0	0	0	0	0	0	0	0	0
	468	0	0	0	0	0	0	0	0	0	0	0	0	0	0	0	0	0	0	0	0									468	0	0	0	0	0	0	0	0	0	0	0	0	0	0	0	0	0	0	0
	469	0	0	0	0	0	0	0	0	0	0	0	0	0	0	0	0	0	0	0	0									469	0	0	0	0	0	0	0	0	0	0	0	0	0	0	0	0	0	0	0
	470	0	0	0	0	0	0	0	0	0	0	0	0	0	0	0	0	0	0	0	0									470	0	0	0	0	0	0	0	0	0	0	0	0	0	0	0	0	0	0	0
	471	0	0	0	0	0	0	0	0	0	0	0	0	0	0	0	0	0	0	0	0									471	0	0	0	0	0	0	0	0	0	0	0	0	0	0	0	0	0	0	0
	472	0	0	0	0	0	0	0	0	0	0	0	0	0	0	0	0	0	0	0	0									472	0	0	0	0	0	0	0	0	0	0	0	0	0	0	0	0	0	0	0
	473	0	0	0	0	0	0	0	0	0	0	0	0	0	0	0	0	0	0	0	0									473	0	0	0	0	0	0	0	0	0	0	0	0	0	0	0	0	0	0	0
	474	0	0	0	0	0	0	0	0	0	0	0	0	0	0	0	0	0	0	0	0									474	0	0	0	0	0	0	0	0	0	0	0	0	0	0	0	0	0	0	0
	475	0	0	0	0	0	0	0	0	0	0	0	0	0	0	0	0	0	0	0	0									475	0	0	0	0	0	0	0	0	0	0	0	0	0	0	0	0	0	0	0
	476	0	0	0	0	0	0	0	0	0	0	0	0	0	0	0	0	0	0	0	0									476	0	0	0	0	0	0	0	0	0	0	0	0	0	0	0	0	0	0	0
	477	0	0	0	0	0	0	0	0	0	0	0	0	0	0	0	0	0	0	0	0									477	0	0	0	0	0	0	0	0	0	0	0	0	0	0	0	0	0	0	0
	478	0	0	0	0	0	0	0	0	0	0	0	0	0	0	0	0	0	0	0	0									478	0	0	0	0	0	0	0	0	0	0	0	0	0	0	0	0	0	0	0
	479	0	0	0	0	0	0	0	0	0	0	0	0	0	0	0	0	0	0	0	0									479	0	0	0	0	0	0	0	0	0	0	0	0	0	0	0	0	0	0	0
	480	0	0	0	0	0	0	0	0	0	0	0	0	0	0	0	0	0	0	0	0									480	0	0	0	0	0	0	0	0	0	0	0	0	0	0	0	0	0	0	0
	481	0	0	0	0	0	0	0	0	0	0	0	0	0	0	0	0	0	0	0	0									481	0	0	0	0	0	0	0	0	0	0	0	0	0	0	0	0	0	0	0
	482	0	0	0	0	0	0	0	0	0	0	0	0	0	0	0	0	0	0	0	0									482	0	0	0	0	0	0	0	0	0	0	0	0	0	0	0	0	0	0	0
	483	0	0	0	0	0	0	0	0	0	0	0	0	0	0	0	0	0	0	0	0									483	0	0	0	0	0	0	0	0	0	0	0	0	0	0	0	0	0	0	0
	484	0	0	0	0	0	0	0	0	0	0	0	0	0	0	0	0	0	0	0	0									484	0	0	0	0	0	0	0	0	0	0	0	0	0	0	0	0	0	0	0
	485	0	0	0	0	0	0	0	0	0	0	0	0	0	0	0	0	0	0	0	0									485	0	0	0	0	0	0	0	0	0	0	0	0	0	0	0	0	0	0	0
	486	0	0	0	0	0	0	0	0	0	0	0	0	0	0	0	0	0	0	0	0									486	0	0	0	0	0	0	0	0	0	0	0	0	0	0	0	0	0	0	0
	487	0	0	0	0	0	0	0	0	0	0	0	0	0	0	0	0	0	0	0	0									487	0	0	0	0	0	0	0	0	0	0	0	0	0	0	0	0	0	0	0
	488	0	0	0	0	0	0	0	0	0	0	0	0	0	0	0	0	0	0	0	0									488	0	0	0	0	0	0	0	0	0	0	0	0	0	0	0	0	0	0	0
	489	0	0	0	0	0	0	0	0	0	0	0	0	0	0	0	0	0	0	0	0									489	0	0	0	0	0	0	0	0	0	0	0	0	0	0	0	0	0	0	0
	490	0	0	0	0	0	0	0	0	0	0	0	0	0	0	0	0	0	0	0	0									490	0	0	0	0	0	0	0	0	0	0	0	0	0	0	0	0	0	0	0
	491	0	0	0	0	0	0	0	0	0	0	0	0	0	0	0	0	0	0	0	0									491	0	0	0	0	0	0	0	0	0	0	0	0	0	0	0	0	0	0	0
	492	0	0	0	0	0	0	0	0	0	0	0	0	0	0	0	0	0	0	0	0									492	0	0	0	0	0	0	0	0	0	0	0	0	0	0	0	0	0	0	0
	493	0	0	0	0	0	0	0	0	0	0	0	0	0	0	0	0	0	0	0	0									493	0	0	0	0	0	0	0	0	0	0	0	0	0	0	0	0	0	0	0
	494	0	0	0	0	0	0	0	0	0	0	0	0	0	0	0	0	0	0	0	0									494	0	0	0	0	0	0	0	0	0	0	0	0	0	0	0	0	0	0	0
	495	0	0	0	0	0	0	0	0	0	0	0	0	0	0	0	0	0	0	0	0									495	0	0	0	0	0	0	0	0	0	0	0	0	0	0	0	0	0	0	0
	496	0	0	0	0	0	0	0	0	0	0	0	0	0	0	0	0	0	0	0	0									496	0	0	0	0	0	0	0	0	0	0	0	0	0	0	0	0	0	0	0
	497	0	0	0	0	0	0	0	0	0	0	0	0	0	0	0	0	0	0	0	0									497	0	0	0	0	0	0	0	0	0	0	0	0	0	0	0	0	0	0	0
	498	0	0	0	0	0	0	0	0	0	0	0	0	0	0	0	0	0	0	0	0									498	0	0	0	0	0	0	0	0	0	0	0	0	0	0	0	0	0	0	0
	499	0	0	0	0	0	0	0	0	0	0	0	0	0	0	0	0	0	0	0	0									499	0	0	0	0	0	0	0	0	0	0	0	0	0	0	0	0	0	0	0
	500	0	0	0	0	0	0	0	0	0	0	0	0	0	0	0	0	0	0	0	0									500	0	0	0	0	0	0	0	0	0	0	0	0	0	0	0	0	0	0	0
	501	0	0	0	0	0	0	0	0	0	0	0	0	0	0	0	0	0	0	0	0									501	0	0	0	0	0	0	0	0	0	0	0	0	0	0	0	0	0	0	0
	502	0	0	0	0	0	0	0	0	0	0	0	0	0	0	0	0	0	0	0	0									502	0	0	0	0	0	0	0	0	0	0	0	0	0	0	0	0	0	0	0
	503	0	0	0	0	0	0	0	0	0	0	0	0	0	0	0	0	0	0	0	0									503	0	0	0	0	0	0	0	0	0	0	0	0	0	0	0	0	0	0	0
	504	0	0	0	0	0	0	0	0	0	0	0	0	0	0	0	0	0	0	0	0									504	0	0	0	0	0	0	0	0	0	0	0	0	0	0	0	0	0	0	0
	505	0	0	0	0	0	0	0	0	0	0	0	0	0	0	0	0	0	0	0	0									505	0	0	0	0	0	0	0	0	0	0	0	0	0	0	0	0	0	0	0
	506	0	0	0	0	0	0	0	0	0	0	0	0	0	0	0	0	0	0	0	0									506	0	0	0	0	0	0	0	0	0	0	0	0	0	0	0	0	0	0	0
	507	0	0	0	0	0	0	0	0	0	0	0	0	0	0	0	0	0	0	0	0									507	0	0	0	0	0	0	0	0	0	0	0	0	0	0	0	0	0	0	0
	508	0	0	0	0	0	0	0	0	0	0	0	0	0	0	0	0	0	0	0	0									508	0	0	0	0	0	0	0	0	0	0	0	0	0	0	0	0	0	0	0
	509	0	0	0	0	0	0	0	0	0	0	0	0	0	0	0	0	0	0	0	0									509	0	0	0	0	0	0	0	0	0	0	0	0	0	0	0	0	0	0	0
	510	0	0	0	0	0	0	0	0	0	0	0	0	0	0	0	0	0	0	0	0									510	0	0	0	0	0	0	0	0	0	0	0	0	0	0	0	0	0	0	0
	511	0	0	0	0	0	0	0	0	0	0	0	0	0	0	0	0	0	0	0	0									511	0	0	0	0	0	0	0	0	0	0	0	0	0	0	0	0	0	0	0
	512	0	0	0	0	0	0	0	0	0	0	0	0	0	0	0	0	0	0	0	0									512	0	0	0	0	0	0	0	0	0	0	0	0	0	0	0	0	0	0	0
	513	0	0	0	0	0	0	0	0	0	0	0	0	0	0	0	0	0	0	0	0									513	0	0	0	0	0	0	0	0	0	0	0	0	0	0	0	0	0	0	0
	514	0	0	0	0	0	0	0	0	0	0	0	0	0	0	0	0	0	0	0	0									514	0	0	0	0	0	0	0	0	0	0	0	0	0	0	0	0	0	0	0
	515	0	0	0	0	0	0	0	0	0	0	0	0	0	0	0	0	0	0	0	0									515	0	0	0	0	0	0	0	0	0	0	0	0	0	0	0	0	0	0	0
	516	0	0	0	0	0	0	0	0	0	0	0	0	0	0	0	0	0	0	0	0									516	0	0	0	0	0	0	0	0	0	0	0	0	0	0	0	0	0	0	0
	517	0	0	0	0	0	0	0	0	0	0	0	0	0	0	0	0	0	0	0	0									517	0	0	0	0	0	0	0	0	0	0	0	0	0	0	0	0	0	0	0
	518	0	0	0	0	0	0	0	0	0	0	0	0	0	0	0	0	0	0	0	0									518	0	0	0	0	0	0	0	0	0	0	0	0	0	0	0	0	0	0	0
	519	0	0	0	0	0	0	0	0	0	0	0	0	0	0	0	0	0	0	0	0									519	0	0	0	0	0	0	0	0	0	0	0	0	0	0	0	0	0	0	0
	520	0	0	0	0	0	0	0	0	0	0	0	0	0	0	0	0	0	0	0	0									520	0	0	0	0	0	0	0	0	0	0	0	0	0	0	0	0	0	0	0
	521	0	0	0	0	0	0	0	0	0	0	0	0	0	0	0	0	0	0	0	0									521	0	0	0	0	0	0	0	0	0	0	0	0	0	0	0	0	0	0	0
	522	0	0	0	0	0	0	0	0	0	0	0	0	0	0	0	0	0	0	0	0									522	0	0	0	0	0	0	0	0	0	0	0	0	0	0	0	0	0	0	0
	523	0	0	0	0	0	0	0	0	0	0	0	0	0	0	0	0	0	0	0	0									523	0	0	0	0	0	0	0	0	0	0	0	0	0	0	0	0	0	0	0
	524	0	0	0	0	0	0	0	0	0	0	0	0	0	0	0	0	0	0	0	0									524	0	0	0	0	0	0	0	0	0	0	0	0	0	0	0	0	0	0	0
	525	0	0	0	0	0	0	0	0	0	0	0	0	0	0	0	0	0	0	0	0									525	0	0	0	0	0	0	0	0	0	0	0	0	0	0	0	0	0	0	0
	526	0	0	0	0	0	0	0	0	0	0	0	0	0	0	0	0	0	0	0	0									526	0	0	0	0	0	0	0	0	0	0	0	0	0	0	0	0	0	0	0
	527	0	0	0	0	0	0	0	0	0	0	0	0	0	0	0	0	0	0	0	0									527	0	0	0	0	0	0	0	0	0	0	0	0	0	0	0	0	0	0	0
	528	0	0	0	0	0	0	0	0	0	0	0	0	0	0	0	0	0	0	0	0									528	0	0	0	0	0	0	0	0	0	0	0	0	0	0	0	0	0	0	0
	529	0	0	0	0	0	0	0	0	0	0	0	0	0	0	0	0	0	0	0	0									529	0	0	0	0	0	0	0	0	0	0	0	0	0	0	0	0	0	0	0
	530	0	0	0	0	0	0	0	0	0	0	0	0	0	0	0	0	0	0	0	0									530	0	0	0	0	0	0	0	0	0	0	0	0	0	0	0	0	0	0	0
	531	0	0	0	0	0	0	0	0	0	0	0	0	0	0	0	0	0	0	0	0									531	0	0	0	0	0	0	0	0	0	0	0	0	0	0	0	0	0	0	0
	532	0	0	0	0	0	0	0	0	0	0	0	0	0	0	0	0	0	0	0	0									532	0	0	0	0	0	0	0	0	0	0	0	0	0	0	0	0	0	0	0
	533	0	0	0	0	0	0	0	0	0	0	0	0	0	0	0	0	0	0	0	0									533	0	0	0	0	0	0	0	0	0	0	0	0	0	0	0	0	0	0	0
	534	0	0	0	0	0	0	0	0	0	0	0	0	0	0	0	0	0	0	0	0									534	0	0	0	0	0	0	0	0	0	0	0	0	0	0	0	0	0	0	0
	535	0	0	0	0	0	0	0	0	0	0	0	0	0	0	0	0	0	0	0	0									535	0	0	0	0	0	0	0	0	0	0	0	0	0	0	0	0	0	0	0
	536	0	0	0	0	0	0	0	0	0	0	0	0	0	0	0	0	0	0	0	0									536	0	0	0	0	0	0	0	0	0	0	0	0	0	0	0	0	0	0	0
	537	0	0	0	0	0	0	0	0	0	0	0	0	0	0	0	0	0	0	0	0									537	0	0	0	0	0	0	0	0	0	0	0	0	0	0	0	0	0	0	0
	538	0	0	0	0	0	0	0	0	0	0	0	0	0	0	0	0	0	0	0	0									538	0	0	0	0	0	0	0	0	0	0	0	0	0	0	0	0	0	0	0
	539	0	0	0	0	0	0	0	0	0	0	0	0	0	0	0	0	0	0	0	0									539	0	0	0	0	0	0	0	0	0	0	0	0	0	0	0	0	0	0	0
	540	0	0	0	0	0	0	0	0	0	0	0	0	0	0	0	0	0	0	0	0									540	0	0	0	0	0	0	0	0	0	0	0	0	0	0	0	0	0	0	0
	541	0	0	0	0	0	0	0	0	0	0	0	0	0	0	0	0	0	0	0	0									541	0	0	0	0	0	0	0	0	0	0	0	0	0	0	0	0	0	0	0
	542	0	0	0	0	0	0	0	0	0	0	0	0	0	0	0	0	0	0	0	0									542	0	0	0	0	0	0	0	0	0	0	0	0	0	0	0	0	0	0	0
	543	0	0	0	0	0	0	0	0	0	0	0	0	0	0	0	0	0	0	0	0									543	0	0	0	0	0	0	0	0	0	0	0	0	0	0	0	0	0	0	0
	544	0	0	0	0	0	0	0	0	0	0	0	0	0	0	0	0	0	0	0	0									544	0	0	0	0	0	0	0	0	0	0	0	0	0	0	0	0	0	0	0
	545	0	0	0	0	0	0	0	0	0	0	0	0	0	0	0	0	0	0	0	0									545	0	0	0	0	0	0	0	0	0	0	0	0	0	0	0	0	0	0	0
	546	0	0	0	0	0	0	0	0	0	0	0	0	0	0	0	0	0	0	0	0									546	0	0	0	0	0	0	0	0	0	0	0	0	0	0	0	0	0	0	0
	547	0	0	0	0	0	0	0	0	0	0	0	0	0	0	0	0	0	0	0	0									547	0	0	0	0	0	0	0	0	0	0	0	0	0	0	0	0	0	0	0
	548	0	0	0	0	0	0	0	0	0	0	0	0	0	0	0	0	0	0	0	0									548	0	0	0	0	0	0	0	0	0	0	0	0	0	0	0	0	0	0	0
	549	0	0	0	0	0	0	0	0	0	0	0	0	0	0	0	0	0	0	0	0									549	0	0	0	0	0	0	0	0	0	0	0	0	0	0	0	0	0	0	0
	550	0	0	0	0	0	0	0	0	0	0	0	0	0	0	0	0	0	0	0	0									550	0	0	0	0	0	0	0	0	0	0	0	0	0	0	0	0	0	0	0
	551	0	0	0	0	0	0	0	0	0	0	0	0	0	0	0	0	0	0	0	0									551	0	0	0	0	0	0	0	0	0	0	0	0	0	0	0	0	0	0	0
	552	0	0	0	0	0	0	0	0	0	0	0	0	0	0	0	0	0	0	0	0									552	0	0	0	0	0	0	0	0	0	0	0	0	0	0	0	0	0	0	0
	553	0	0	0	0	0	0	0	0	0	0	0	0	0	0	0	0	0	0	0	0									553	0	0	0	0	0	0	0	0	0	0	0	0	0	0	0	0	0	0	0
	554	0	0	0	0	0	0	0	0	0	0	0	0	0	0	0	0	0	0	0	0									554	0	0	0	0	0	0	0	0	0	0	0	0	0	0	0	0	0	0	0
	555	0	0	0	0	0	0	0	0	0	0	0	0	0	0	0	0	0	0	0	0									555	0	0	0	0	0	0	0	0	0	0	0	0	0	0	0	0	0	0	0
	556	0	0	0	0	0	0	0	0	0	0	0	0	0	0	0	0	0	0	0	0									556	0	0	0	0	0	0	0	0	0	0	0	0	0	0	0	0	0	0	0
	557	0	0	0	0	0	0	0	0	0	0	0	0	0	0	0	0	0	0	0	0									557	0	0	0	0	0	0	0	0	0	0	0	0	0	0	0	0	0	0	0
	558	0	0	0	0	0	0	0	0	0	0	0	0	0	0	0	0	0	0	0	0									558	0	0	0	0	0	0	0	0	0	0	0	0	0	0	0	0	0	0	0
	559	0	0	0	0	0	0	0	0	0	0	0	0	0	0	0	0	0	0	0	0									559	0	0	0	0	0	0	0	0	0	0	0	0	0	0	0	0	0	0	0
	560	0	0	0	0	0	0	0	0	0	0	0	0	0	0	0	0	0	0	0	0									560	0	0	0	0	0	0	0	0	0	0	0	0	0	0	0	0	0	0	0
	561	0	0	0	0	0	0	0	0	0	0	0	0	0	0	0	0	0	0	0	0									561	0	0	0	0	0	0	0	0	0	0	0	0	0	0	0	0	0	0	0
	562	0	0	0	0	0	0	0	0	0	0	0	0	0	0	0	0	0	0	0	0									562	0	0	0	0	0	0	0	0	0	0	0	0	0	0	0	0	0	0	0
	563	0	0	0	0	0	0	0	0	0	0	0	0	0	0	0	0	0	0	0	0									563	0	0	0	0	0	0	0	0	0	0	0	0	0	0	0	0	0	0	0
	564	0	0	0	0	0	0	0	0	0	0	0	0	0	0	0	0	0	0	0	0									564	0	0	0	0	0	0	0	0	0	0	0	0	0	0	0	0	0	0	0
	565	0	0	0	0	0	0	0	0	0	0	0	0	0	0	0	0	0	0	0	0									565	0	0	0	0	0	0	0	0	0	0	0	0	0	0	0	0	0	0	0
	566	0	0	0	0	0	0	0	0	0	0	0	0	0	0	0	0	0	0	0	0									566	0	0	0	0	0	0	0	0	0	0	0	0	0	0	0	0	0	0	0
	567	0	0	0	0	0	0	0	0	0	0	0	0	0	0	0	0	0	0	0	0									567	0	0	0	0	0	0	0	0	0	0	0	0	0	0	0	0	0	0	0
	568	0	0	0	0	0	0	0	0	0	0	0	0	0	0	0	0	0	0	0	0									568	0	0	0	0	0	0	0	0	0	0	0	0	0	0	0	0	0	0	0
	569	0	0	0	0	0	0	0	0	0	0	0	0	0	0	0	0	0	0	0	0									569	0	0	0	0	0	0	0	0	0	0	0	0	0	0	0	0	0	0	0
	570	0	0	0	0	0	0	0	0	0	0	0	0	0	0	0	0	0	0	0	0									570	0	0	0	0	0	0	0	0	0	0	0	0	0	0	0	0	0	0	0
	571	0	0	0	0	0	0	0	0	0	0	0	0	0	0	0	0	0	0	0	0									571	0	0	0	0	0	0	0	0	0	0	0	0	0	0	0	0	0	0	0
	572	0	0	0	0	0	0	0	0	0	0	0	0	0	0	0	0	0	0	0	0									572	0	0	0	0	0	0	0	0	0	0	0	0	0	0	0	0	0	0	0
	573	0	0	0	0	0	0	0	0	0	0	0	0	0	0	0	0	0	0	0	0									573	0	0	0	0	0	0	0	0	0	0	0	0	0	0	0	0	0	0	0
	574	0	0	0	0	0	0	0	0	0	0	0	0	0	0	0	0	0	0	0	0									574	0	0	0	0	0	0	0	0	0	0	0	0	0	0	0	0	0	0	0
	575	0	0	0	0	0	0	0	0	0	0	0	0	0	0	0	0	0	0	0	0									575	0	0	0	0	0	0	0	0	0	0	0	0	0	0	0	0	0	0	0
	576	0	0	0	0	0	0	0	0	0	0	0	0	0	0	0	0	0	0	0	0									576	0	0	0	0	0	0	0	0	0	0	0	0	0	0	0	0	0	0	0
	577	0	0	0	0	0	0	0	0	0	0	0	0	0	0	0	0	0	0	0	0									577	0	0	0	0	0	0	0	0	0	0	0	0	0	0	0	0	0	0	0
	578	0	0	0	0	0	0	0	0	0	0	0	0	0	0	0	0	0	0	0	0									578	0	0	0	0	0	0	0	0	0	0	0	0	0	0	0	0	0	0	0
	579	0	0	0	0	0	0	0	0	0	0	0	0	0	0	0	0	0	0	0	0									579	0	0	0	0	0	0	0	0	0	0	0	0	0	0	0	0	0	0	0
	580	0	0	0	0	0	0	0	0	0	0	0	0	0	0	0	0	0	0	0	0									580	0	0	0	0	0	0	0	0	0	0	0	0	0	0	0	0	0	0	0
	581	0	0	0	0	0	0	0	0	0	0	0	0	0	0	0	0	0	0	0	0									581	0	0	0	0	0	0	0	0	0	0	0	0	0	0	0	0	0	0	0
	582	0	0	0	0	0	0	0	0	0	0	0	0	0	0	0	0	0	0	0	0									582	0	0	0	0	0	0	0	0	0	0	0	0	0	0	0	0	0	0	0
	583	0	0	0	0	0	0	0	0	0	0	0	0	0	0	0	0	0	0	0	0									583	0	0	0	0	0	0	0	0	0	0	0	0	0	0	0	0	0	0	0
	584	0	0	0	0	0	0	0	0	0	0	0	0	0	0	0	0	0	0	0	0									584	0	0	0	0	0	0	0	0	0	0	0	0	0	0	0	0	0	0	0
	585	0	0	0	0	0	0	0	0	0	0	0	0	0	0	0	0	0	0	0	0									585	0	0	0	0	0	0	0	0	0	0	0	0	0	0	0	0	0	0	0
	586	0	0	0	0	0	0	0	0	0	0	0	0	0	0	0	0	0	0	0	0									586	0	0	0	0	0	0	0	0	0	0	0	0	0	0	0	0	0	0	0
	587	0	0	0	0	0	0	0	0	0	0	0	0	0	0	0	0	0	0	0	0									587	0	0	0	0	0	0	0	0	0	0	0	0	0	0	0	0	0	0	0
	588	0	0	0	0	0	0	0	0	0	0	0	0	0	0	0	0	0	0	0	0									588	0	0	0	0	0	0	0	0	0	0	0	0	0	0	0	0	0	0	0
	589	0	0	0	0	0	0	0	0	0	0	0	0	0	0	0	0	0	0	0	0									589	0	0	0	0	0	0	0	0	0	0	0	0	0	0	0	0	0	0	0
	590	0	0	0	0	0	0	0	0	0	0	0	0	0	0	0	0	0	0	0	0									590	0	0	0	0	0	0	0	0	0	0	0	0	0	0	0	0	0	0	0
	591	0	0	0	0	0	0	0	0	0	0	0	0	0	0	0	0	0	0	0	0									591	0	0	0	0	0	0	0	0	0	0	0	0	0	0	0	0	0	0	0
	592	0	0	0	0	0	0	0	0	0	0	0	0	0	0	0	0	0	0	0	0									592	0	0	0	0	0	0	0	0	0	0	0	0	0	0	0	0	0	0	0
	593	0	0	0	0	0	0	0	0	0	0	0	0	0	0	0	0	0	0	0	0									593	0	0	0	0	0	0	0	0	0	0	0	0	0	0	0	0	0	0	0
	594	0	0	0	0	0	0	0	0	0	0	0	0	0	0	0	0	0	0	0	0									594	0	0	0	0	0	0	0	0	0	0	0	0	0	0	0	0	0	0	0
	595	0	0	0	0	0	0	0	0	0	0	0	0	0	0	0	0	0	0	0	0									595	0	0	0	0	0	0	0	0	0	0	0	0	0	0	0	0	0	0	0
	596	0	0	0	0	0	0	0	0	0	0	0	0	0	0	0	0	0	0	0	0									596	0	0	0	0	0	0	0	0	0	0	0	0	0	0	0	0	0	0	0
	597	0	0	0	0	0	0	0	0	0	0	0	0	0	0	0	0	0	0	0	0									597	0	0	0	0	0	0	0	0	0	0	0	0	0	0	0	0	0	0	0
	598	0	0	0	0	0	0	0	0	0	0	0	0	0	0	0	0	0	0	0	0									598	0	0	0	0	0	0	0	0	0	0	0	0	0	0	0	0	0	0	0
	599	0	0	0	0	0	0	0	0	0	0	0	0	0	0	0	0	0	0	0	0									599	0	0	0	0	0	0	0	0	0	0	0	0	0	0	0	0	0	0	0
	600	0	0	0	0	0	0	0	0	0	0	0	0	0	0	0	0	0	0	0	0									600	0	0	0	0	0	0	0	0	0	0	0	0	0	0	0	0	0	0	0
	601	0	0	0	0	0	0	0	0	0	0	0	0	0	0	0	0	0	0	0	0									601	0	0	0	0	0	0	0	0	0	0	0	0	0	0	0	0	0	0	0
	602	0	0	0	0	0	0	0	0	0	0	0	0	0	0	0	0	0	0	0	0									602	0	0	0	0	0	0	0	0	0	0	0	0	0	0	0	0	0	0	0
	603	0	0	0	0	0	0	0	0	0	0	0	0	0	0	0	0	0	0	0	0									603	0	0	0	0	0	0	0	0	0	0	0	0	0	0	0	0	0	0	0
	604	0	0	0	0	0	0	0	0	0	0	0	0	0	0	0	0	0	0	0	0									604	0	0	0	0	0	0	0	0	0	0	0	0	0	0	0	0	0	0	0
	605	0	0	0	0	0	0	0	0	0	0	0	0	0	0	0	0	0	0	0	0									605	0	0	0	0	0	0	0	0	0	0	0	0	0	0	0	0	0	0	0
	606	0	0	0	0	0	0	0	0	0	0	0	0	0	0	0	0	0	0	0	0									606	0	0	0	0	0	0	0	0	0	0	0	0	0	0	0	0	0	0	0
	607	0	0	0	0	0	0	0	0	0	0	0	0	0	0	0	0	0	0	0	0									607	0	0	0	0	0	0	0	0	0	0	0	0	0	0	0	0	0	0	0
	608	0	0	0	0	0	0	0	0	0	0	0	0	0	0	0	0	0	0	0	0									608	0	0	0	0	0	0	0	0	0	0	0	0	0	0	0	0	0	0	0
	609	0	0	0	0	0	0	0	0	0	0	0	0	0	0	0	0	0	0	0	0									609	0	0	0	0	0	0	0	0	0	0	0	0	0	0	0	0	0	0	0
	610	0	0	0	0	0	0	0	0	0	0	0	0	0	0	0	0	0	0	0	0									610	0	0	0	0	0	0	0	0	0	0	0	0	0	0	0	0	0	0	0
	611	0	0	0	0	0	0	0	0	0	0	0	0	0	0	0	0	0	0	0	0									611	0	0	0	0	0	0	0	0	0	0	0	0	0	0	0	0	0	0	0
	612	0	0	0	0	0	0	0	0	0	0	0	0	0	0	0	0	0	0	0	0									612	0	0	0	0	0	0	0	0	0	0	0	0	0	0	0	0	0	0	0
	613	0	0	0	0	0	0	0	0	0	0	0	0	0	0	0	0	0	0	0	0									613	0	0	0	0	0	0	0	0	0	0	0	0	0	0	0	0	0	0	0
	614	0	0	0	0	0	0	0	0	0	0	0	0	0	0	0	0	0	0	0	0									614	0	0	0	0	0	0	0	0	0	0	0	0	0	0	0	0	0	0	0
	615	0	0	0	0	0	0	0	0	0	0	0	0	0	0	0	0	0	0	0	0									615	0	0	0	0	0	0	0	0	0	0	0	0	0	0	0	0	0	0	0
	616	0	0	0	0	0	0	0	0	0	0	0	0	0	0	0	0	0	0	0	0									616	0	0	0	0	0	0	0	0	0	0	0	0	0	0	0	0	0	0	0
	617	0	0	0	0	0	0	0	0	0	0	0	0	0	0	0	0	0	0	0	0									617	0	0	0	0	0	0	0	0	0	0	0	0	0	0	0	0	0	0	0
	618	0	0	0	0	0	0	0	0	0	0	0	0	0	0	0	0	0	0	0	0									618	0	0	0	0	0	0	0	0	0	0	0	0	0	0	0	0	0	0	0
	619	0	0	0	0	0	0	0	0	0	0	0	0	0	0	0	0	0	0	0	0									619	0	0	0	0	0	0	0	0	0	0	0	0	0	0	0	0	0	0	0
	620	0	0	0	0	0	0	0	0	0	0	0	0	0	0	0	0	0	0	0	0									620	0	0	0	0	0	0	0	0	0	0	0	0	0	0	0	0	0	0	0
	621	0	0	0	0	0	0	0	0	0	0	0	0	0	0	0	0	0	0	0	0									621	0	0	0	0	0	0	0	0	0	0	0	0	0	0	0	0	0	0	0
	622	0	0	0	0	0	0	0	0	0	0	0	0	0	0	0	0	0	0	0	0									622	0	0	0	0	0	0	0	0	0	0	0	0	0	0	0	0	0	0	0
	623	0	0	0	0	0	0	0	0	0	0	0	0	0	0	0	0	0	0	0	0									623	0	0	0	0	0	0	0	0	0	0	0	0	0	0	0	0	0	0	0
	624	0	0	0	0	0	0	0	0	0	0	0	0	0	0	0	0	0	0	0	0									624	0	0	0	0	0	0	0	0	0	0	0	0	0	0	0	0	0	0	0
	625	0	0	0	0	0	0	0	0	0	0	0	0	0	0	0	0	0	0	0	0									625	0	0	0	0	0	0	0	0	0	0	0	0	0	0	0	0	0	0	0
	626	0	0	0	0	0	0	0	0	0	0	0	0	0	0	0	0	0	0	0	0									626	0	0	0	0	0	0	0	0	0	0	0	0	0	0	0	0	0	0	0
	627	0	0	0	0	0	0	0	0	0	0	0	0	0	0	0	0	0	0	0	0									627	0	0	0	0	0	0	0	0	0	0	0	0	0	0	0	0	0	0	0
	628	0	0	0	0	0	0	0	0	0	0	0	0	0	0	0	0	0	0	0	0									628	0	0	0	0	0	0	0	0	0	0	0	0	0	0	0	0	0	0	0
	629	0	0	0	0	0	0	0	0	0	0	0	0	0	0	0	0	0	0	0	0									629	0	0	0	0	0	0	0	0	0	0	0	0	0	0	0	0	0	0	0
	630	0	0	0	0	0	0	0	0	0	0	0	0	0	0	0	0	0	0	0	0									630	0	0	0	0	0	0	0	0	0	0	0	0	0	0	0	0	0	0	0
	631	0	0	0	0	0	0	0	0	0	0	0	0	0	0	0	0	0	0	0	0									631	0	0	0	0	0	0	0	0	0	0	0	0	0	0	0	0	0	0	0
	632	0	0	0	0	0	0	0	0	0	0	0	0	0	0	0	0	0	0	0	0									632	0	0	0	0	0	0	0	0	0	0	0	0	0	0	0	0	0	0	0
	633	0	0	0	0	0	0	0	0	0	0	0	0	0	0	0	0	0	0	0	0									633	0	0	0	0	0	0	0	0	0	0	0	0	0	0	0	0	0	0	0
	634	0	0	0	0	0	0	0	0	0	0	0	0	0	0	0	0	0	0	0	0									634	0	0	0	0	0	0	0	0	0	0	0	0	0	0	0	0	0	0	0
	635	0	0	0	0	0	0	0	0	0	0	0	0	0	0	0	0	0	0	0	0									635	0	0	0	0	0	0	0	0	0	0	0	0	0	0	0	0	0	0	0
	636	0	0	0	0	0	0	0	0	0	0	0	0	0	0	0	0	0	0	0	0									636	0	0	0	0	0	0	0	0	0	0	0	0	0	0	0	0	0	0	0
	637	0	0	0	0	0	0	0	0	0	0	0	0	0	0	0	0	0	0	0	0									637	0	0	0	0	0	0	0	0	0	0	0	0	0	0	0	0	0	0	0
	638	0	0	0	0	0	0	0	0	0	0	0	0	0	0	0	0	0	0	0	0									638	0	0	0	0	0	0	0	0	0	0	0	0	0	0	0	0	0	0	0
	639	0	0	0	0	0	0	0	0	0	0	0	0	0	0	0	0	0	0	0	0									639	0	0	0	0	0	0	0	0	0	0	0	0	0	0	0	0	0	0	0
	640	0	0	0	0	0	0	0	0	0	0	0	0	0	0	0	0	0	0	0	0									640	0	0	0	0	0	0	0	0	0	0	0	0	0	0	0	0	0	0	0
	641	0	0	0	0	0	0	0	0	0	0	0	0	0	0	0	0	0	0	0	0									641	0	0	0	0	0	0	0	0	0	0	0	0	0	0	0	0	0	0	0
	642	0	0	0	0	0	0	0	0	0	0	0	0	0	0	0	0	0	0	0	0									642	0	0	0	0	0	0	0	0	0	0	0	0	0	0	0	0	0	0	0
	643	0	0	0	0	0	0	0	0	0	0	0	0	0	0	0	0	0	0	0	0									643	0	0	0	0	0	0	0	0	0	0	0	0	0	0	0	0	0	0	0
	644	0	0	0	0	0	0	0	0	0	0	0	0	0	0	0	0	0	0	0	0									644	0	0	0	0	0	0	0	0	0	0	0	0	0	0	0	0	0	0	0
	645	0	0	0	0	0	0	0	0	0	0	0	0	0	0	0	0	0	0	0	0									645	0	0	0	0	0	0	0	0	0	0	0	0	0	0	0	0	0	0	0
	646	0	0	0	0	0	0	0	0	0	0	0	0	0	0	0	0	0	0	0	0									646	0	0	0	0	0	0	0	0	0	0	0	0	0	0	0	0	0	0	0
	647	0	0	0	0	0	0	0	0	0	0	0	0	0	0	0	0	0	0	0	0									647	0	0	0	0	0	0	0	0	0	0	0	0	0	0	0	0	0	0	0
	648	0	0	0	0	0	0	0	0	0	0	0	0	0	0	0	0	0	0	0	0									648	0	0	0	0	0	0	0	0	0	0	0	0	0	0	0	0	0	0	0
	649	0	0	0	0	0	0	0	0	0	0	0	0	0	0	0	0	0	0	0	0									649	0	0	0	0	0	0	0	0	0	0	0	0	0	0	0	0	0	0	0
	650	0	0	0	0	0	0	0	0	0	0	0	0	0	0	0	0	0	0	0	0									650	0	0	0	0	0	0	0	0	0	0	0	0	0	0	0	0	0	0	0
	651	0	0	0	0	0	0	0	0	0	0	0	0	0	0	0	0	0	0	0	0									651	0	0	0	0	0	0	0	0	0	0	0	0	0	0	0	0	0	0	0
	652	0	0	0	0	0	0	0	0	0	0	0	0	0	0	0	0	0	0	0	0									652	0	0	0	0	0	0	0	0	0	0	0	0	0	0	0	0	0	0	0
	653	0	0	0	0	0	0	0	0	0	0	0	0	0	0	0	0	0	0	0	0									653	0	0	0	0	0	0	0	0	0	0	0	0	0	0	0	0	0	0	0
	654	0	0	0	0	0	0	0	0	0	0	0	0	0	0	0	0	0	0	0	0									654	0	0	0	0	0	0	0	0	0	0	0	0	0	0	0	0	0	0	0
	655	0	0	0	0	0	0	0	0	0	0	0	0	0	0	0	0	0	0	0	0									655	0	0	0	0	0	0	0	0	0	0	0	0	0	0	0	0	0	0	0
	656	0	0	0	0	0	0	0	0	0	0	0	0	0	0	0	0	0	0	0	0									656	0	0	0	0	0	0	0	0	0	0	0	0	0	0	0	0	0	0	0
	657	0	0	0	0	0	0	0	0	0	0	0	0	0	0	0	0	0	0	0	0									657	0	0	0	0	0	0	0	0	0	0	0	0	0	0	0	0	0	0	0
	658	0	0	0	0	0	0	0	0	0	0	0	0	0	0	0	0	0	0	0	0									658	0	0	0	0	0	0	0	0	0	0	0	0	0	0	0	0	0	0	0
	659	0	0	0	0	0	0	0	0	0	0	0	0	0	0	0	0	0	0	0	0									659	0	0	0	0	0	0	0	0	0	0	0	0	0	0	0	0	0	0	0
	660	0	0	0	0	0	0	0	0	0	0	0	0	0	0	0	0	0	0	0	0									660	0	0	0	0	0	0	0	0	0	0	0	0	0	0	0	0	0	0	0
	661	0	0	0	0	0	0	0	0	0	0	0	0	0	0	0	0	0	0	0	0									661	0	0	0	0	0	0	0	0	0	0	0	0	0	0	0	0	0	0	0
	662	0	0	0	0	0	0	0	0	0	0	0	0	0	0	0	0	0	0	0	0									662	0	0	0	0	0	0	0	0	0	0	0	0	0	0	0	0	0	0	0
	663	0	0	0	0	0	0	0	0	0	0	0	0	0	0	0	0	0	0	0	0									663	0	0	0	0	0	0	0	0	0	0	0	0	0	0	0	0	0	0	0
	664	0	0	0	0	0	0	0	0	0	0	0	0	0	0	0	0	0	0	0	0									664	0	0	0	0	0	0	0	0	0	0	0	0	0	0	0	0	0	0	0
	665	0	0	0	0	0	0	0	0	0	0	0	0	0	0	0	0	0	0	0	0									665	0	0	0	0	0	0	0	0	0	0	0	0	0	0	0	0	0	0	0
	666	0	0	0	0	0	0	0	0	0	0	0	0	0	0	0	0	0	0	0	0									666	0	0	0	0	0	0	0	0	0	0	0	0	0	0	0	0	0	0	0
	667	0	0	0	0	0	0	0	0	0	0	0	0	0	0	0	0	0	0	0	0									667	0	0	0	0	0	0	0	0	0	0	0	0	0	0	0	0	0	0	0
	668	0	0	0	0	0	0	0	0	0	0	0	0	0	0	0	0	0	0	0	0									668	0	0	0	0	0	0	0	0	0	0	0	0	0	0	0	0	0	0	0
	669	0	0	0	0	0	0	0	0	0	0	0	0	0	0	0	0	0	0	0	0									669	0	0	0	0	0	0	0	0	0	0	0	0	0	0	0	0	0	0	0
	670	0	0	0	0	0	0	0	0	0	0	0	0	0	0	0	0	0	0	0	0									670	0	0	0	0	0	0	0	0	0	0	0	0	0	0	0	0	0	0	0
	671	0	0	0	0	0	0	0	0	0	0	0	0	0	0	0	0	0	0	0	0									671	0	0	0	0	0	0	0	0	0	0	0	0	0	0	0	0	0	0	0
	672	0	0	0	0	0	0	0	0	0	0	0	0	0	0	0	0	0	0	0	0									672	0	0	0	0	0	0	0	0	0	0	0	0	0	0	0	0	0	0	0
	673	0	0	0	0	0	0	0	0	0	0	0	0	0	0	0	0	0	0	0	0									673	0	0	0	0	0	0	0	0	0	0	0	0	0	0	0	0	0	0	0
	674	0	0	0	0	0	0	0	0	0	0	0	0	0	0	0	0	0	0	0	0									674	0	0	0	0	0	0	0	0	0	0	0	0	0	0	0	0	0	0	0
	675	0	0	0	0	0	0	0	0	0	0	0	0	0	0	0	0	0	0	0	0									675	0	0	0	0	0	0	0	0	0	0	0	0	0	0	0	0	0	0	0
	676	0	0	0	0	0	0	0	0	0	0	0	0	0	0	0	0	0	0	0	0									676	0	0	0	0	0	0	0	0	0	0	0	0	0	0	0	0	0	0	0
	677	0	0	0	0	0	0	0	0	0	0	0	0	0	0	0	0	0	0	0	0									677	0	0	0	0	0	0	0	0	0	0	0	0	0	0	0	0	0	0	0
	678	0	0	0	0	0	0	0	0	0	0	0	0	0	0	0	0	0	0	0	0									678	0	0	0	0	0	0	0	0	0	0	0	0	0	0	0	0	0	0	0
	679	0	0	0	0	0	0	0	0	0	0	0	0	0	0	0	0	0	0	0	0									679	0	0	0	0	0	0	0	0	0	0	0	0	0	0	0	0	0	0	0
	680	0	0	0	0	0	0	0	0	0	0	0	0	0	0	0	0	0	0	0	0									680	0	0	0	0	0	0	0	0	0	0	0	0	0	0	0	0	0	0	0
	681	0	0	0	0	0	0	0	0	0	0	0	0	0	0	0	0	0	0	0	0									681	0	0	0	0	0	0	0	0	0	0	0	0	0	0	0	0	0	0	0
	682	0	0	0	0	0	0	0	0	0	0	0	0	0	0	0	0	0	0	0	0									682	0	0	0	0	0	0	0	0	0	0	0	0	0	0	0	0	0	0	0
	683	0	0	0	0	0	0	0	0	0	0	0	0	0	0	0	0	0	0	0	0									683	0	0	0	0	0	0	0	0	0	0	0	0	0	0	0	0	0	0	0
	684	0	0	0	0	0	0	0	0	0	0	0	0	0	0	0	0	0	0	0	0									684	0	0	0	0	0	0	0	0	0	0	0	0	0	0	0	0	0	0	0
	685	0	0	0	0	0	0	0	0	0	0	0	0	0	0	0	0	0	0	0	0									685	0	0	0	0	0	0	0	0	0	0	0	0	0	0	0	0	0	0	0
	686	0	0	0	0	0	0	0	0	0	0	0	0	0	0	0	0	0	0	0	0									686	0	0	0	0	0	0	0	0	0	0	0	0	0	0	0	0	0	0	0
	687	0	0	0	0	0	0	0	0	0	0	0	0	0	0	0	0	0	0	0	0									687	0	0	0	0	0	0	0	0	0	0	0	0	0	0	0	0	0	0	0
	688	0	0	0	0	0	0	0	0	0	0	0	0	0	0	0	0	0	0	0	0									688	0	0	0	0	0	0	0	0	0	0	0	0	0	0	0	0	0	0	0
	689	0	0	0	0	0	0	0	0	0	0	0	0	0	0	0	0	0	0	0	0									689	0	0	0	0	0	0	0	0	0	0	0	0	0	0	0	0	0	0	0
	690	0	0	0	0	0	0	0	0	0	0	0	0	0	0	0	0	0	0	0	0									690	0	0	0	0	0	0	0	0	0	0	0	0	0	0	0	0	0	0	0
	691	0	0	0	0	0	0	0	0	0	0	0	0	0	0	0	0	0	0	0	0									691	0	0	0	0	0	0	0	0	0	0	0	0	0	0	0	0	0	0	0
	692	0	0	0	0	0	0	0	0	0	0	0	0	0	0	0	0	0	0	0	0									692	0	0	0	0	0	0	0	0	0	0	0	0	0	0	0	0	0	0	0
	693	0	0	0	0	0	0	0	0	0	0	0	0	0	0	0	0	0	0	0	0									693	0	0	0	0	0	0	0	0	0	0	0	0	0	0	0	0	0	0	0
	694	0	0	0	0	0	0	0	0	0	0	0	0	0	0	0	0	0	0	0	0									694	0	0	0	0	0	0	0	0	0	0	0	0	0	0	0	0	0	0	0
	695	0	0	0	0	0	0	0	0	0	0	0	0	0	0	0	0	0	0	0	0									695	0	0	0	0	0	0	0	0	0	0	0	0	0	0	0	0	0	0	0
	696	0	0	0	0	0	0	0	0	0	0	0	0	0	0	0	0	0	0	0	0									696	0	0	0	0	0	0	0	0	0	0	0	0	0	0	0	0	0	0	0
	697	0	0	0	0	0	0	0	0	0	0	0	0	0	0	0	0	0	0	0	0									697	0	0	0	0	0	0	0	0	0	0	0	0	0	0	0	0	0	0	0
	698	0	0	0	0	0	0	0	0	0	0	0	0	0	0	0	0	0	0	0	0									698	0	0	0	0	0	0	0	0	0	0	0	0	0	0	0	0	0	0	0
	699	0	0	0	0	0	0	0	0	0	0	0	0	0	0	0	0	0	0	0	0									699	0	0	0	0	0	0	0	0	0	0	0	0	0	0	0	0	0	0	0
	700	0	0	0	0	0	0	0	0	0	0	0	0	0	0	0	0	0	0	0	0									700	0	0	0	0	0	0	0	0	0	0	0	0	0	0	0	0	0	0	0
	701	0	0	0	0	0	0	0	0	0	0	0	0	0	0	0	0	0	0	0	0									701	0	0	0	0	0	0	0	0	0	0	0	0	0	0	0	0	0	0	0
	702	0	0	0	0	0	0	0	0	0	0	0	0	0	0	0	0	0	0	0	0									702	0	0	0	0	0	0	0	0	0	0	0	0	0	0	0	0	0	0	0
	703	0	0	0	0	0	0	0	0	0	0	0	0	0	0	0	0	0	0	0	0									703	0	0	0	0	0	0	0	0	0	0	0	0	0	0	0	0	0	0	0
	704	0	0	0	0	0	0	0	0	0	0	0	0	0	0	0	0	0	0	0	0									704	0	0	0	0	0	0	0	0	0	0	0	0	0	0	0	0	0	0	0
	705	0	0	0	0	0	0	0	0	0	0	0	0	0	0	0	0	0	0	0	0									705	0	0	0	0	0	0	0	0	0	0	0	0	0	0	0	0	0	0	0
	706	0	0	0	0	0	0	0	0	0	0	0	0	0	0	0	0	0	0	0	0									706	0	0	0	0	0	0	0	0	0	0	0	0	0	0	0	0	0	0	0
	707	0	0	0	0	0	0	0	0	0	0	0	0	0	0	0	0	0	0	0	0									707	0	0	0	0	0	0	0	0	0	0	0	0	0	0	0	0	0	0	0
	708	0	0	0	0	0	0	0	0	0	0	0	0	0	0	0	0	0	0	0	0									708	0	0	0	0	0	0	0	0	0	0	0	0	0	0	0	0	0	0	0
	709	0	0	0	0	0	0	0	0	0	0	0	0	0	0	0	0	0	0	0	0									709	0	0	0	0	0	0	0	0	0	0	0	0	0	0	0	0	0	0	0
	710	0	0	0	0	0	0	0	0	0	0	0	0	0	0	0	0	0	0	0	0									710	0	0	0	0	0	0	0	0	0	0	0	0	0	0	0	0	0	0	0
	711	0	0	0	0	0	0	0	0	0	0	0	0	0	0	0	0	0	0	0	0									711	0	0	0	0	0	0	0	0	0	0	0	0	0	0	0	0	0	0	0
	712	0	0	0	0	0	0	0	0	0	0	0	0	0	0	0	0	0	0	0	0									712	0	0	0	0	0	0	0	0	0	0	0	0	0	0	0	0	0	0	0
	713	0	0	0	0	0	0	0	0	0	0	0	0	0	0	0	0	0	0	0	0									713	0	0	0	0	0	0	0	0	0	0	0	0	0	0	0	0	0	0	0
	714	0	0	0	0	0	0	0	0	0	0	0	0	0	0	0	0	0	0	0	0									714	0	0	0	0	0	0	0	0	0	0	0	0	0	0	0	0	0	0	0
	715	0	0	0	0	0	0	0	0	0	0	0	0	0	0	0	0	0	0	0	0									715	0	0	0	0	0	0	0	0	0	0	0	0	0	0	0	0	0	0	0
	716	0	0	0	0	0	0	0	0	0	0	0	0	0	0	0	0	0	0	0	0									716	0	0	0	0	0	0	0	0	0	0	0	0	0	0	0	0	0	0	0
	717	0	0	0	0	0	0	0	0	0	0	0	0	0	0	0	0	0	0	0	0									717	0	0	0	0	0	0	0	0	0	0	0	0	0	0	0	0	0	0	0
	718	0	0	0	0	0	0	0	0	0	0	0	0	0	0	0	0	0	0	0	0									718	0	0	0	0	0	0	0	0	0	0	0	0	0	0	0	0	0	0	0
	719	0	0	0	0	0	0	0	0	0	0	0	0	0	0	0	0	0	0	0	0									719	0	0	0	0	0	0	0	0	0	0	0	0	0	0	0	0	0	0	0
	720	0	0	0	0	0	0	0	0	0	0	0	0	0	0	0	0	0	0	0	0									720	0	0	0	0	0	0	0	0	0	0	0	0	0	0	0	0	0	0	0
	721	0	0	0	0	0	0	0	0	0	0	0	0	0	0	0	0	0	0	0	0									721	0	0	0	0	0	0	0	0	0	0	0	0	0	0	0	0	0	0	0
	722	0	0	0	0	0	0	0	0	0	0	0	0	0	0	0	0	0	0	0	0									722	0	0	0	0	0	0	0	0	0	0	0	0	0	0	0	0	0	0	0
	723	0	0	0	0	0	0	0	0	0	0	0	0	0	0	0	0	0	0	0	0									723	0	0	0	0	0	0	0	0	0	0	0	0	0	0	0	0	0	0	0
	724	0	0	0	0	0	0	0	0	0	0	0	0	0	0	0	0	0	0	0	0									724	0	0	0	0	0	0	0	0	0	0	0	0	0	0	0	0	0	0	0
	725	0	0	0	0	0	0	0	0	0	0	0	0	0	0	0	0	0	0	0	0									725	0	0	0	0	0	0	0	0	0	0	0	0	0	0	0	0	0	0	0
	726	0	0	0	0	0	0	0	0	0	0	0	0	0	0	0	0	0	0	0	0									726	0	0	0	0	0	0	0	0	0	0	0	0	0	0	0	0	0	0	0
	727	0	0	0	0	0	0	0	0	0	0	0	0	0	0	0	0	0	0	0	0									727	0	0	0	0	0	0	0	0	0	0	0	0	0	0	0	0	0	0	0
	728	0	0	0	0	0	0	0	0	0	0	0	0	0	0	0	0	0	0	0	0									728	0	0	0	0	0	0	0	0	0	0	0	0	0	0	0	0	0	0	0
	729	0	0	0	0	0	0	0	0	0	0	0	0	0	0	0	0	0	0	0	0									729	0	0	0	0	0	0	0	0	0	0	0	0	0	0	0	0	0	0	0
	730	0	0	0	0	0	0	0	0	0	0	0	0	0	0	0	0	0	0	0	0									730	0	0	0	0	0	0	0	0	0	0	0	0	0	0	0	0	0	0	0
	731	0	0	0	0	0	0	0	0	0	0	0	0	0	0	0	0	0	0	0	0									731	0	0	0	0	0	0	0	0	0	0	0	0	0	0	0	0	0	0	0
	732	0	0	0	0	0	0	0	0	0	0	0	0	0	0	0	0	0	0	0	0									732	0	0	0	0	0	0	0	0	0	0	0	0	0	0	0	0	0	0	0
	733	0	0	0	0	0	0	0	0	0	0	0	0	0	0	0	0	0	0	0	0									733	0	0	0	0	0	0	0	0	0	0	0	0	0	0	0	0	0	0	0
	734	0	0	0	0	0	0	0	0	0	0	0	0	0	0	0	0	0	0	0	0									734	0	0	0	0	0	0	0	0	0	0	0	0	0	0	0	0	0	0	0
	735	0	0	0	0	0	0	0	0	0	0	0	0	0	0	0	0	0	0	0	0									735	0	0	0	0	0	0	0	0	0	0	0	0	0	0	0	0	0	0	0
	736	0	0	0	0	0	0	0	0	0	0	0	0	0	0	0	0	0	0	0	0									736	0	0	0	0	0	0	0	0	0	0	0	0	0	0	0	0	0	0	0
	737	0	0	0	0	0	0	0	0	0	0	0	0	0	0	0	0	0	0	0	0									737	0	0	0	0	0	0	0	0	0	0	0	0	0	0	0	0	0	0	0
	738	0	0	0	0	0	0	0	0	0	0	0	0	0	0	0	0	0	0	0	0									738	0	0	0	0	0	0	0	0	0	0	0	0	0	0	0	0	0	0	0
	739	0	0	0	0	0	0	0	0	0	0	0	0	0	0	0	0	0	0	0	0									739	0	0	0	0	0	0	0	0	0	0	0	0	0	0	0	0	0	0	0
	740	0	0	0	0	0	0	0	0	0	0	0	0	0	0	0	0	0	0	0	0									740	0	0	0	0	0	0	0	0	0	0	0	0	0	0	0	0	0	0	0
	741	0	0	0	0	0	0	0	0	0	0	0	0	0	0	0	0	0	0	0	0									741	0	0	0	0	0	0	0	0	0	0	0	0	0	0	0	0	0	0	0
	742	0	0	0	0	0	0	0	0	0	0	0	0	0	0	0	0	0	0	0	0									742	0	0	0	0	0	0	0	0	0	0	0	0	0	0	0	0	0	0	0
	743	0	0	0	0	0	0	0	0	0	0	0	0	0	0	0	0	0	0	0	0									743	0	0	0	0	0	0	0	0	0	0	0	0	0	0	0	0	0	0	0
	744	0	0	0	0	0	0	0	0	0	0	0	0	0	0	0	0	0	0	0	0									744	0	0	0	0	0	0	0	0	0	0	0	0	0	0	0	0	0	0	0
	745	0	0	0	0	0	0	0	0	0	0	0	0	0	0	0	0	0	0	0	0									745	0	0	0	0	0	0	0	0	0	0	0	0	0	0	0	0	0	0	0
	746	0	0	0	0	0	0	0	0	0	0	0	0	0	0	0	0	0	0	0	0									746	0	0	0	0	0	0	0	0	0	0	0	0	0	0	0	0	0	0	0
	747	0	0	0	0	0	0	0	0	0	0	0	0	0	0	0	0	0	0	0	0									747	0	0	0	0	0	0	0	0	0	0	0	0	0	0	0	0	0	0	0
	748	0	0	0	0	0	0	0	0	0	0	0	0	0	0	0	0	0	0	0	0									748	0	0	0	0	0	0	0	0	0	0	0	0	0	0	0	0	0	0	0
	749	0	0	0	0	0	0	0	0	0	0	0	0	0	0	0	0	0	0	0	0									749	0	0	0	0	0	0	0	0	0	0	0	0	0	0	0	0	0	0	0
	750	0	0	0	0	0	0	0	0	0	0	0	0	0	0	0	0	0	0	0	0									750	0	0	0	0	0	0	0	0	0	0	0	0	0	0	0	0	0	0	0
	751	0	0	0	0	0	0	0	0	0	0	0	0	0	0	0	0	0	0	0	0									751	0	0	0	0	0	0	0	0	0	0	0	0	0	0	0	0	0	0	0
	752	0	0	0	0	0	0	0	0	0	0	0	0	0	0	0	0	0	0	0	0									752	0	0	0	0	0	0	0	0	0	0	0	0	0	0	0	0	0	0	0
	753	0	0	0	0	0	0	0	0	0	0	0	0	0	0	0	0	0	0	0	0									753	0	0	0	0	0	0	0	0	0	0	0	0	0	0	0	0	0	0	0
	754	0	0	0	0	0	0	0	0	0	0	0	0	0	0	0	0	0	0	0	0									754	0	0	0	0	0	0	0	0	0	0	0	0	0	0	0	0	0	0	0
	755	0	0	0	0	0	0	0	0	0	0	0	0	0	0	0	0	0	0	0	0									755	0	0	0	0	0	0	0	0	0	0	0	0	0	0	0	0	0	0	0
	756	0	0	0	0	0	0	0	0	0	0	0	0	0	0	0	0	0	0	0	0									756	0	0	0	0	0	0	0	0	0	0	0	0	0	0	0	0	0	0	0
	757	0	0	0	0	0	0	0	0	0	0	0	0	0	0	0	0	0	0	0	0									757	0	0	0	0	0	0	0	0	0	0	0	0	0	0	0	0	0	0	0
	758	0	0	0	0	0	0	0	0	0	0	0	0	0	0	0	0	0	0	0	0									758	0	0	0	0	0	0	0	0	0	0	0	0	0	0	0	0	0	0	0
	759	0	0	0	0	0	0	0	0	0	0	0	0	0	0	0	0	0	0	0	0									759	0	0	0	0	0	0	0	0	0	0	0	0	0	0	0	0	0	0	0
	760	0	0	0	0	0	0	0	0	0	0	0	0	0	0	0	0	0	0	0	0									760	0	0	0	0	0	0	0	0	0	0	0	0	0	0	0	0	0	0	0
	761	0	0	0	0	0	0	0	0	0	0	0	0	0	0	0	0	0	0	0	0									761	0	0	0	0	0	0	0	0	0	0	0	0	0	0	0	0	0	0	0
	762	0	0	0	0	0	0	0	0	0	0	0	0	0	0	0	0	0	0	0	0									762	0	0	0	0	0	0	0	0	0	0	0	0	0	0	0	0	0	0	0
	763	0	0	0	0	0	0	0	0	0	0	0	0	0	0	0	0	0	0	0	0									763	0	0	0	0	0	0	0	0	0	0	0	0	0	0	0	0	0	0	0
	764	0	0	0	0	0	0	0	0	0	0	0	0	0	0	0	0	0	0	0	0									764	0	0	0	0	0	0	0	0	0	0	0	0	0	0	0	0	0	0	0
	765	0	0	0	0	0	0	0	0	0	0	0	0	0	0	0	0	0	0	0	0									765	0	0	0	0	0	0	0	0	0	0	0	0	0	0	0	0	0	0	0
	766	0	0	0	0	0	0	0	0	0	0	0	0	0	0	0	0	0	0	0	0									766	0	0	0	0	0	0	0	0	0	0	0	0	0	0	0	0	0	0	0
	767	0	0	0	0	0	0	0	0	0	0	0	0	0	0	0	0	0	0	0	0									767	0	0	0	0	0	0	0	0	0	0	0	0	0	0	0	0	0	0	0
	768	0	0	0	0	0	0	0	0	0	0	0	0	0	0	0	0	0	0	0	0									768	0	0	0	0	0	0	0	0	0	0	0	0	0	0	0	0	0	0	0
	769	0	0	0	0	0	0	0	0	0	0	0	0	0	0	0	0	0	0	0	0									769	0	0	0	0	0	0	0	0	0	0	0	0	0	0	0	0	0	0	0
	770	0	0	0	0	0	0	0	0	0	0	0	0	0	0	0	0	0	0	0	0									770	0	0	0	0	0	0	0	0	0	0	0	0	0	0	0	0	0	0	0
	771	0	0	0	0	0	0	0	0	0	0	0	0	0	0	0	0	0	0	0	0									771	0	0	0	0	0	0	0	0	0	0	0	0	0	0	0	0	0	0	0
	772	0	0	0	0	0	0	0	0	0	0	0	0	0	0	0	0	0	0	0	0									772	0	0	0	0	0	0	0	0	0	0	0	0	0	0	0	0	0	0	0
	773	0	0	0	0	0	0	0	0	0	0	0	0	0	0	0	0	0	0	0	0									773	0	0	0	0	0	0	0	0	0	0	0	0	0	0	0	0	0	0	0
	774	0	0	0	0	0	0	0	0	0	0	0	0	0	0	0	0	0	0	0	0									774	0	0	0	0	0	0	0	0	0	0	0	0	0	0	0	0	0	0	0
	775	0	0	0	0	0	0	0	0	0	0	0	0	0	0	0	0	0	0	0	0									775	0	0	0	0	0	0	0	0	0	0	0	0	0	0	0	0	0	0	0
	776	0	0	0	0	0	0	0	0	0	0	0	0	0	0	0	0	0	0	0	0									776	0	0	0	0	0	0	0	0	0	0	0	0	0	0	0	0	0	0	0
	777	0	0	0	0	0	0	0	0	0	0	0	0	0	0	0	0	0	0	0	0									777	0	0	0	0	0	0	0	0	0	0	0	0	0	0	0	0	0	0	0
	778	0	0	0	0	0	0	0	0	0	0	0	0	0	0	0	0	0	0	0	0									778	0	0	0	0	0	0	0	0	0	0	0	0	0	0	0	0	0	0	0
	779	0	0	0	0	0	0	0	0	0	0	0	0	0	0	0	0	0	0	0	0									779	0	0	0	0	0	0	0	0	0	0	0	0	0	0	0	0	0	0	0
	780	0	0	0	0	0	0	0	0	0	0	0	0	0	0	0	0	0	0	0	0									780	0	0	0	0	0	0	0	0	0	0	0	0	0	0	0	0	0	0	0
	781	0	0	0	0	0	0	0	0	0	0	0	0	0	0	0	0	0	0	0	0									781	0	0	0	0	0	0	0	0	0	0	0	0	0	0	0	0	0	0	0
	782	0	0	0	0	0	0	0	0	0	0	0	0	0	0	0	0	0	0	0	0									782	0	0	0	0	0	0	0	0	0	0	0	0	0	0	0	0	0	0	0
	783	0	0	0	0	0	0	0	0	0	0	0	0	0	0	0	0	0	0	0	0									783	0	0	0	0	0	0	0	0	0	0	0	0	0	0	0	0	0	0	0
	784	0	0	0	0	0	0	0	0	0	0	0	0	0	0	0	0	0	0	0	0									784	0	0	0	0	0	0	0	0	0	0	0	0	0	0	0	0	0	0	0
	785	0	0	0	0	0	0	0	0	0	0	0	0	0	0	0	0	0	0	0	0									785	0	0	0	0	0	0	0	0	0	0	0	0	0	0	0	0	0	0	0
	786	0	0	0	0	0	0	0	0	0	0	0	0	0	0	0	0	0	0	0	0									786	0	0	0	0	0	0	0	0	0	0	0	0	0	0	0	0	0	0	0
	787	0	0	0	0	0	0	0	0	0	0	0	0	0	0	0	0	0	0	0	0									787	0	0	0	0	0	0	0	0	0	0	0	0	0	0	0	0	0	0	0
	788	0	0	0	0	0	0	0	0	0	0	0	0	0	0	0	0	0	0	0	0									788	0	0	0	0	0	0	0	0	0	0	0	0	0	0	0	0	0	0	0
	789	0	0	0	0	0	0	0	0	0	0	0	0	0	0	0	0	0	0	0	0									789	0	0	0	0	0	0	0	0	0	0	0	0	0	0	0	0	0	0	0
	790	0	0	0	0	0	0	0	0	0	0	0	0	0	0	0	0	0	0	0	0									790	0	0	0	0	0	0	0	0	0	0	0	0	0	0	0	0	0	0	0
	791	0	0	0	0	0	0	0	0	0	0	0	0	0	0	0	0	0	0	0	0									791	0	0	0	0	0	0	0	0	0	0	0	0	0	0	0	0	0	0	0
	792	0	0	0	0	0	0	0	0	0	0	0	0	0	0	0	0	0	0	0	0									792	0	0	0	0	0	0	0	0	0	0	0	0	0	0	0	0	0	0	0
	793	0	0	0	0	0	0	0	0	0	0	0	0	0	0	0	0	0	0	0	0									793	0	0	0	0	0	0	0	0	0	0	0	0	0	0	0	0	0	0	0
	794	0	0	0	0	0	0	0	0	0	0	0	0	0	0	0	0	0	0	0	0									794	0	0	0	0	0	0	0	0	0	0	0	0	0	0	0	0	0	0	0
	795	0	0	0	0	0	0	0	0	0	0	0	0	0	0	0	0	0	0	0	0									795	0	0	0	0	0	0	0	0	0	0	0	0	0	0	0	0	0	0	0
	796	0	0	0	0	0	0	0	0	0	0	0	0	0	0	0	0	0	0	0	0									796	0	0	0	0	0	0	0	0	0	0	0	0	0	0	0	0	0	0	0
	797	0	0	0	0	0	0	0	0	0	0	0	0	0	0	0	0	0	0	0	0									797	0	0	0	0	0	0	0	0	0	0	0	0	0	0	0	0	0	0	0
	798	0	0	0	0	0	0	0	0	0	0	0	0	0	0	0	0	0	0	0	0									798	0	0	0	0	0	0	0	0	0	0	0	0	0	0	0	0	0	0	0
	799	0	0	0	0	0	0	0	0	0	0	0	0	0	0	0	0	0	0	0	0									799	0	0	0	0	0	0	0	0	0	0	0	0	0	0	0	0	0	0	0
	800	0	0	0	0	0	0	0	0	0	0	0	0	0	0	0	0	0	0	0	0									800	0	0	0	0	0	0	0	0	0	0	0	0	0	0	0	0	0	0	0
	801	0	0	0	0	0	0	0	0	0	0	0	0	0	0	0	0	0	0	0	0									801	0	0	0	0	0	0	0	0	0	0	0	0	0	0	0	0	0	0	0
	802	0	0	0	0	0	0	0	0	0	0	0	0	0	0	0	0	0	0	0	0									802	0	0	0	0	0	0	0	0	0	0	0	0	0	0	0	0	0	0	0
	803	0	0	0	0	0	0	0	0	0	0	0	0	0	0	0	0	0	0	0	0									803	0	0	0	0	0	0	0	0	0	0	0	0	0	0	0	0	0	0	0
	804	0	0	0	0	0	0	0	0	0	0	0	0	0	0	0	0	0	0	0	0									804	0	0	0	0	0	0	0	0	0	0	0	0	0	0	0	0	0	0	0
	805	0	0	0	0	0	0	0	0	0	0	0	0	0	0	0	0	0	0	0	0									805	0	0	0	0	0	0	0	0	0	0	0	0	0	0	0	0	0	0	0
	806	0	0	0	0	0	0	0	0	0	0	0	0	0	0	0	0	0	0	0	0									806	0	0	0	0	0	0	0	0	0	0	0	0	0	0	0	0	0	0	0
	807	0	0	0	0	0	0	0	0	0	0	0	0	0	0	0	0	0	0	0	0									807	0	0	0	0	0	0	0	0	0	0	0	0	0	0	0	0	0	0	0
	808	0	0	0	0	0	0	0	0	0	0	0	0	0	0	0	0	0	0	0	0									808	0	0	0	0	0	0	0	0	0	0	0	0	0	0	0	0	0	0	0
	809	0	0	0	0	0	0	0	0	0	0	0	0	0	0	0	0	0	0	0	0									809	0	0	0	0	0	0	0	0	0	0	0	0	0	0	0	0	0	0	0
	810	0	0	0	0	0	0	0	0	0	0	0	0	0	0	0	0	0	0	0	0									810	0	0	0	0	0	0	0	0	0	0	0	0	0	0	0	0	0	0	0
	811	0	0	0	0	0	0	0	0	0	0	0	0	0	0	0	0	0	0	0	0									811	0	0	0	0	0	0	0	0	0	0	0	0	0	0	0	0	0	0	0
	812	0	0	0	0	0	0	0	0	0	0	0	0	0	0	0	0	0	0	0	0									812	0	0	0	0	0	0	0	0	0	0	0	0	0	0	0	0	0	0	0
	813	0	0	0	0	0	0	0	0	0	0	0	0	0	0	0	0	0	0	0	0									813	0	0	0	0	0	0	0	0	0	0	0	0	0	0	0	0	0	0	0
	814	0	0	0	0	0	0	0	0	0	0	0	0	0	0	0	0	0	0	0	0									814	0	0	0	0	0	0	0	0	0	0	0	0	0	0	0	0	0	0	0
	815	0	0	0	0	0	0	0	0	0	0	0	0	0	0	0	0	0	0	0	0									815	0	0	0	0	0	0	0	0	0	0	0	0	0	0	0	0	0	0	0
	816	0	0	0	0	0	0	0	0	0	0	0	0	0	0	0	0	0	0	0	0									816	0	0	0	0	0	0	0	0	0	0	0	0	0	0	0	0	0	0	0
	817	0	0	0	0	0	0	0	0	0	0	0	0	0	0	0	0	0	0	0	0									817	0	0	0	0	0	0	0	0	0	0	0	0	0	0	0	0	0	0	0
	818	0	0	0	0	0	0	0	0	0	0	0	0	0	0	0	0	0	0	0	0									818	0	0	0	0	0	0	0	0	0	0	0	0	0	0	0	0	0	0	0
	819	0	0	0	0	0	0	0	0	0	0	0	0	0	0	0	0	0	0	0	0									819	0	0	0	0	0	0	0	0	0	0	0	0	0	0	0	0	0	0	0
	820	0	0	0	0	0	0	0	0	0	0	0	0	0	0	0	0	0	0	0	0									820	0	0	0	0	0	0	0	0	0	0	0	0	0	0	0	0	0	0	0
	821	0	0	0	0	0	0	0	0	0	0	0	0	0	0	0	0	0	0	0	0									821	0	0	0	0	0	0	0	0	0	0	0	0	0	0	0	0	0	0	0
	822	0	0	0	0	0	0	0	0	0	0	0	0	0	0	0	0	0	0	0	0									822	0	0	0	0	0	0	0	0	0	0	0	0	0	0	0	0	0	0	0
	823	0	0	0	0	0	0	0	0	0	0	0	0	0	0	0	0	0	0	0	0									823	0	0	0	0	0	0	0	0	0	0	0	0	0	0	0	0	0	0	0
	824	0	0	0	0	0	0	0	0	0	0	0	0	0	0	0	0	0	0	0	0									824	0	0	0	0	0	0	0	0	0	0	0	0	0	0	0	0	0	0	0
	825	0	0	0	0	0	0	0	0	0	0	0	0	0	0	0	0	0	0	0	0									825	0	0	0	0	0	0	0	0	0	0	0	0	0	0	0	0	0	0	0
	826	0	0	0	0	0	0	0	0	0	0	0	0	0	0	0	0	0	0	0	0									826	0	0	0	0	0	0	0	0	0	0	0	0	0	0	0	0	0	0	0
	827	0	0	0	0	0	0	0	0	0	0	0	0	0	0	0	0	0	0	0	0									827	0	0	0	0	0	0	0	0	0	0	0	0	0	0	0	0	0	0	0
	828	0	0	0	0	0	0	0	0	0	0	0	0	0	0	0	0	0	0	0	0									828	0	0	0	0	0	0	0	0	0	0	0	0	0	0	0	0	0	0	0
	829	0	0	0	0	0	0	0	0	0	0	0	0	0	0	0	0	0	0	0	0									829	0	0	0	0	0	0	0	0	0	0	0	0	0	0	0	0	0	0	0
	830	0	0	0	0	0	0	0	0	0	0	0	0	0	0	0	0	0	0	0	0									830	0	0	0	0	0	0	0	0	0	0	0	0	0	0	0	0	0	0	0
	831	0	0	0	0	0	0	0	0	0	0	0	0	0	0	0	0	0	0	0	0									831	0	0	0	0	0	0	0	0	0	0	0	0	0	0	0	0	0	0	0
	832	0	0	0	0	0	0	0	0	0	0	0	0	0	0	0	0	0	0	0	0									832	0	0	0	0	0	0	0	0	0	0	0	0	0	0	0	0	0	0	0
	833	0	0	0	0	0	0	0	0	0	0	0	0	0	0	0	0	0	0	0	0									833	0	0	0	0	0	0	0	0	0	0	0	0	0	0	0	0	0	0	0
	834	0	0	0	0	0	0	0	0	0	0	0	0	0	0	0	0	0	0	0	0									834	0	0	0	0	0	0	0	0	0	0	0	0	0	0	0	0	0	0	0
	835	0	0	0	0	0	0	0	0	0	0	0	0	0	0	0	0	0	0	0	0									835	0	0	0	0	0	0	0	0	0	0	0	0	0	0	0	0	0	0	0
	836	0	0	0	0	0	0	0	0	0	0	0	0	0	0	0	0	0	0	0	0									836	0	0	0	0	0	0	0	0	0	0	0	0	0	0	0	0	0	0	0
	837	0	0	0	0	0	0	0	0	0	0	0	0	0	0	0	0	0	0	0	0									837	0	0	0	0	0	0	0	0	0	0	0	0	0	0	0	0	0	0	0
	838	0	0	0	0	0	0	0	0	0	0	0	0	0	0	0	0	0	0	0	0									838	0	0	0	0	0	0	0	0	0	0	0	0	0	0	0	0	0	0	0
	839	0	0	0	0	0	0	0	0	0	0	0	0	0	0	0	0	0	0	0	0									839	0	0	0	0	0	0	0	0	0	0	0	0	0	0	0	0	0	0	0
	840	0	0	0	0	0	0	0	0	0	0	0	0	0	0	0	0	0	0	0	0									840	0	0	0	0	0	0	0	0	0	0	0	0	0	0	0	0	0	0	0
	841	0	0	0	0	0	0	0	0	0	0	0	0	0	0	0	0	0	0	0	0									841	0	0	0	0	0	0	0	0	0	0	0	0	0	0	0	0	0	0	0
	842	0	0	0	0	0	0	0	0	0	0	0	0	0	0	0	0	0	0	0	0									842	0	0	0	0	0	0	0	0	0	0	0	0	0	0	0	0	0	0	0
	843	0	0	0	0	0	0	0	0	0	0	0	0	0	0	0	0	0	0	0	0									843	0	0	0	0	0	0	0	0	0	0	0	0	0	0	0	0	0	0	0
	844	0	0	0	0	0	0	0	0	0	0	0	0	0	0	0	0	0	0	0	0									844	0	0	0	0	0	0	0	0	0	0	0	0	0	0	0	0	0	0	0
	845	0	0	0	0	0	0	0	0	0	0	0	0	0	0	0	0	0	0	0	0									845	0	0	0	0	0	0	0	0	0	0	0	0	0	0	0	0	0	0	0
	846	0	0	0	0	0	0	0	0	0	0	0	0	0	0	0	0	0	0	0	0									846	0	0	0	0	0	0	0	0	0	0	0	0	0	0	0	0	0	0	0
	847	0	0	0	0	0	0	0	0	0	0	0	0	0	0	0	0	0	0	0	0									847	0	0	0	0	0	0	0	0	0	0	0	0	0	0	0	0	0	0	0
	848	0	0	0	0	0	0	0	0	0	0	0	0	0	0	0	0	0	0	0	0									848	0	0	0	0	0	0	0	0	0	0	0	0	0	0	0	0	0	0	0
	849	0	0	0	0	0	0	0	0	0	0	0	0	0	0	0	0	0	0	0	0									849	0	0	0	0	0	0	0	0	0	0	0	0	0	0	0	0	0	0	0
	850	0	0	0	0	0	0	0	0	0	0	0	0	0	0	0	0	0	0	0	0									850	0	0	0	0	0	0	0	0	0	0	0	0	0	0	0	0	0	0	0
	851	0	0	0	0	0	0	0	0	0	0	0	0	0	0	0	0	0	0	0	0									851	0	0	0	0	0	0	0	0	0	0	0	0	0	0	0	0	0	0	0
	852	0	0	0	0	0	0	0	0	0	0	0	0	0	0	0	0	0	0	0	0									852	0	0	0	0	0	0	0	0	0	0	0	0	0	0	0	0	0	0	0
	853	0	0	0	0	0	0	0	0	0	0	0	0	0	0	0	0	0	0	0	0									853	0	0	0	0	0	0	0	0	0	0	0	0	0	0	0	0	0	0	0
	854	0	0	0	0	0	0	0	0	0	0	0	0	0	0	0	0	0	0	0	0									854	0	0	0	0	0	0	0	0	0	0	0	0	0	0	0	0	0	0	0
	855	0	0	0	0	0	0	0	0	0	0	0	0	0	0	0	0	0	0	0	0									855	0	0	0	0	0	0	0	0	0	0	0	0	0	0	0	0	0	0	0
	856	0	0	0	0	0	0	0	0	0	0	0	0	0	0	0	0	0	0	0	0									856	0	0	0	0	0	0	0	0	0	0	0	0	0	0	0	0	0	0	0
	857	0	0	0	0	0	0	0	0	0	0	0	0	0	0	0	0	0	0	0	0									857	0	0	0	0	0	0	0	0	0	0	0	0	0	0	0	0	0	0	0
	858	0	0	0	0	0	0	0	0	0	0	0	0	0	0	0	0	0	0	0	0									858	0	0	0	0	0	0	0	0	0	0	0	0	0	0	0	0	0	0	0
	859	0	0	0	0	0	0	0	0	0	0	0	0	0	0	0	0	0	0	0	0									859	0	0	0	0	0	0	0	0	0	0	0	0	0	0	0	0	0	0	0
	860	0	0	0	0	0	0	0	0	0	0	0	0	0	0	0	0	0	0	0	0									860	0	0	0	0	0	0	0	0	0	0	0	0	0	0	0	0	0	0	0
	861	0	0	0	0	0	0	0	0	0	0	0	0	0	0	0	0	0	0	0	0									861	0	0	0	0	0	0	0	0	0	0	0	0	0	0	0	0	0	0	0
	862	0	0	0	0	0	0	0	0	0	0	0	0	0	0	0	0	0	0	0	0									862	0	0	0	0	0	0	0	0	0	0	0	0	0	0	0	0	0	0	0
	863	0	0	0	0	0	0	0	0	0	0	0	0	0	0	0	0	0	0	0	0									863	0	0	0	0	0	0	0	0	0	0	0	0	0	0	0	0	0	0	0
	864	0	0	0	0	0	0	0	0	0	0	0	0	0	0	0	0	0	0	0	0									864	0	0	0	0	0	0	0	0	0	0	0	0	0	0	0	0	0	0	0
	865	0	0	0	0	0	0	0	0	0	0	0	0	0	0	0	0	0	0	0	0									865	0	0	0	0	0	0	0	0	0	0	0	0	0	0	0	0	0	0	0
	866	0	0	0	0	0	0	0	0	0	0	0	0	0	0	0	0	0	0	0	0									866	0	0	0	0	0	0	0	0	0	0	0	0	0	0	0	0	0	0	0
	867	0	0	0	0	0	0	0	0	0	0	0	0	0	0	0	0	0	0	0	0									867	0	0	0	0	0	0	0	0	0	0	0	0	0	0	0	0	0	0	0
	868	0	0	0	0	0	0	0	0	0	0	0	0	0	0	0	0	0	0	0	0									868	0	0	0	0	0	0	0	0	0	0	0	0	0	0	0	0	0	0	0
	869	0	0	0	0	0	0	0	0	0	0	0	0	0	0	0	0	0	0	0	0									869	0	0	0	0	0	0	0	0	0	0	0	0	0	0	0	0	0	0	0
	870	0	0	0	0	0	0	0	0	0	0	0	0	0	0	0	0	0	0	0	0									870	0	0	0	0	0	0	0	0	0	0	0	0	0	0	0	0	0	0	0
	871	0	0	0	0	0	0	0	0	0	0	0	0	0	0	0	0	0	0	0	0									871	0	0	0	0	0	0	0	0	0	0	0	0	0	0	0	0	0	0	0
	872	0	0	0	0	0	0	0	0	0	0	0	0	0	0	0	0	0	0	0	0									872	0	0	0	0	0	0	0	0	0	0	0	0	0	0	0	0	0	0	0
	873	0	0	0	0	0	0	0	0	0	0	0	0	0	0	0	0	0	0	0	0									873	0	0	0	0	0	0	0	0	0	0	0	0	0	0	0	0	0	0	0
	874	0	0	0	0	0	0	0	0	0	0	0	0	0	0	0	0	0	0	0	0									874	0	0	0	0	0	0	0	0	0	0	0	0	0	0	0	0	0	0	0
	875	0	0	0	0	0	0	0	0	0	0	0	0	0	0	0	0	0	0	0	0									875	0	0	0	0	0	0	0	0	0	0	0	0	0	0	0	0	0	0	0
	876	0	0	0	0	0	0	0	0	0	0	0	0	0	0	0	0	0	0	0	0									876	0	0	0	0	0	0	0	0	0	0	0	0	0	0	0	0	0	0	0
	877	0	0	0	0	0	0	0	0	0	0	0	0	0	0	0	0	0	0	0	0									877	0	0	0	0	0	0	0	0	0	0	0	0	0	0	0	0	0	0	0
	878	0	0	0	0	0	0	0	0	0	0	0	0	0	0	0	0	0	0	0	0									878	0	0	0	0	0	0	0	0	0	0	0	0	0	0	0	0	0	0	0
	879	0	0	0	0	0	0	0	0	0	0	0	0	0	0	0	0	0	0	0	0									879	0	0	0	0	0	0	0	0	0	0	0	0	0	0	0	0	0	0	0
	880	0	0	0	0	0	0	0	0	0	0	0	0	0	0	0	0	0	0	0	0									880	0	0	0	0	0	0	0	0	0	0	0	0	0	0	0	0	0	0	0
	881	0	0	0	0	0	0	0	0	0	0	0	0	0	0	0	0	0	0	0	0									881	0	0	0	0	0	0	0	0	0	0	0	0	0	0	0	0	0	0	0
	882	0	0	0	0	0	0	0	0	0	0	0	0	0	0	0	0	0	0	0	0									882	0	0	0	0	0	0	0	0	0	0	0	0	0	0	0	0	0	0	0
	883	0	0	0	0	0	0	0	0	0	0	0	0	0	0	0	0	0	0	0	0									883	0	0	0	0	0	0	0	0	0	0	0	0	0	0	0	0	0	0	0
	884	0	0	0	0	0	0	0	0	0	0	0	0	0	0	0	0	0	0	0	0									884	0	0	0	0	0	0	0	0	0	0	0	0	0	0	0	0	0	0	0
	885	0	0	0	0	0	0	0	0	0	0	0	0	0	0	0	0	0	0	0	0									885	0	0	0	0	0	0	0	0	0	0	0	0	0	0	0	0	0	0	0
	886	0	0	0	0	0	0	0	0	0	0	0	0	0	0	0	0	0	0	0	0									886	0	0	0	0	0	0	0	0	0	0	0	0	0	0	0	0	0	0	0
	887	0	0	0	0	0	0	0	0	0	0	0	0	0	0	0	0	0	0	0	0									887	0	0	0	0	0	0	0	0	0	0	0	0	0	0	0	0	0	0	0
	888	0	0	0	0	0	0	0	0	0	0	0	0	0	0	0	0	0	0	0	0									888	0	0	0	0	0	0	0	0	0	0	0	0	0	0	0	0	0	0	0
	889	0	0	0	0	0	0	0	0	0	0	0	0	0	0	0	0	0	0	0	0									889	0	0	0	0	0	0	0	0	0	0	0	0	0	0	0	0	0	0	0
	890	0	0	0	0	0	0	0	0	0	0	0	0	0	0	0	0	0	0	0	0									890	0	0	0	0	0	0	0	0	0	0	0	0	0	0	0	0	0	0	0
	891	0	0	0	0	0	0	0	0	0	0	0	0	0	0	0	0	0	0	0	0									891	0	0	0	0	0	0	0	0	0	0	0	0	0	0	0	0	0	0	0
	892	0	0	0	0	0	0	0	0	0	0	0	0	0	0	0	0	0	0	0	0									892	0	0	0	0	0	0	0	0	0	0	0	0	0	0	0	0	0	0	0
	893	0	0	0	0	0	0	0	0	0	0	0	0	0	0	0	0	0	0	0	0									893	0	0	0	0	0	0	0	0	0	0	0	0	0	0	0	0	0	0	0
	894	0	0	0	0	0	0	0	0	0	0	0	0	0	0	0	0	0	0	0	0									894	0	0	0	0	0	0	0	0	0	0	0	0	0	0	0	0	0	0	0
	895	0	0	0	0	0	0	0	0	0	0	0	0	0	0	0	0	0	0	0	0									895	0	0	0	0	0	0	0	0	0	0	0	0	0	0	0	0	0	0	0
	896	0	0	0	0	0	0	0	0	0	0	0	0	0	0	0	0	0	0	0	0									896	0	0	0	0	0	0	0	0	0	0	0	0	0	0	0	0	0	0	0
	897	0	0	0	0	0	0	0	0	0	0	0	0	0	0	0	0	0	0	0	0									897	0	0	0	0	0	0	0	0	0	0	0	0	0	0	0	0	0	0	0
	898	0	0	0	0	0	0	0	0	0	0	0	0	0	0	0	0	0	0	0	0									898	0	0	0	0	0	0	0	0	0	0	0	0	0	0	0	0	0	0	0
	899	0	0	0	0	0	0	0	0	0	0	0	0	0	0	0	0	0	0	0	0									899	0	0	0	0	0	0	0	0	0	0	0	0	0	0	0	0	0	0	0
	900	0	0	0	0	0	0	0	0	0	0	0	0	0	0	0	0	0	0	0	0									900	0	0	0	0	0	0	0	0	0	0	0	0	0	0	0	0	0	0	0
	901	0	0	0	0	0	0	0	0	0	0	0	0	0	0	0	0	0	0	0	0									901	0	0	0	0	0	0	0	0	0	0	0	0	0	0	0	0	0	0	0
	902	0	0	0	0	0	0	0	0	0	0	0	0	0	0	0	0	0	0	0	0									902	0	0	0	0	0	0	0	0	0	0	0	0	0	0	0	0	0	0	0
	903	0	0	0	0	0	0	0	0	0	0	0	0	0	0	0	0	0	0	0	0									903	0	0	0	0	0	0	0	0	0	0	0	0	0	0	0	0	0	0	0
	904	0	0	0	0	0	0	0	0	0	0	0	0	0	0	0	0	0	0	0	0									904	0	0	0	0	0	0	0	0	0	0	0	0	0	0	0	0	0	0	0
	905	0	0	0	0	0	0	0	0	0	0	0	0	0	0	0	0	0	0	0	0									905	0	0	0	0	0	0	0	0	0	0	0	0	0	0	0	0	0	0	0
	906	0	0	0	0	0	0	0	0	0	0	0	0	0	0	0	0	0	0	0	0									906	0	0	0	0	0	0	0	0	0	0	0	0	0	0	0	0	0	0	0
	907	0	0	0	0	0	0	0	0	0	0	0	0	0	0	0	0	0	0	0	0									907	0	0	0	0	0	0	0	0	0	0	0	0	0	0	0	0	0	0	0
	908	0	0	0	0	0	0	0	0	0	0	0	0	0	0	0	0	0	0	0	0									908	0	0	0	0	0	0	0	0	0	0	0	0	0	0	0	0	0	0	0
	909	0	0	0	0	0	0	0	0	0	0	0	0	0	0	0	0	0	0	0	0									909	0	0	0	0	0	0	0	0	0	0	0	0	0	0	0	0	0	0	0
	910	0	0	0	0	0	0	0	0	0	0	0	0	0	0	0	0	0	0	0	0									910	0	0	0	0	0	0	0	0	0	0	0	0	0	0	0	0	0	0	0
	911	0	0	0	0	0	0	0	0	0	0	0	0	0	0	0	0	0	0	0	0									911	0	0	0	0	0	0	0	0	0	0	0	0	0	0	0	0	0	0	0
	912	0	0	0	0	0	0	0	0	0	0	0	0	0	0	0	0	0	0	0	0									912	0	0	0	0	0	0	0	0	0	0	0	0	0	0	0	0	0	0	0
	913	0	0	0	0	0	0	0	0	0	0	0	0	0	0	0	0	0	0	0	0									913	0	0	0	0	0	0	0	0	0	0	0	0	0	0	0	0	0	0	0
	914	0	0	0	0	0	0	0	0	0	0	0	0	0	0	0	0	0	0	0	0									914	0	0	0	0	0	0	0	0	0	0	0	0	0	0	0	0	0	0	0
	915	0	0	0	0	0	0	0	0	0	0	0	0	0	0	0	0	0	0	0	0									915	0	0	0	0	0	0	0	0	0	0	0	0	0	0	0	0	0	0	0
	916	0	0	0	0	0	0	0	0	0	0	0	0	0	0	0	0	0	0	0	0									916	0	0	0	0	0	0	0	0	0	0	0	0	0	0	0	0	0	0	0
	917	0	0	0	0	0	0	0	0	0	0	0	0	0	0	0	0	0	0	0	0									917	0	0	0	0	0	0	0	0	0	0	0	0	0	0	0	0	0	0	0
	918	0	0	0	0	0	0	0	0	0	0	0	0	0	0	0	0	0	0	0	0									918	0	0	0	0	0	0	0	0	0	0	0	0	0	0	0	0	0	0	0
	919	0	0	0	0	0	0	0	0	0	0	0	0	0	0	0	0	0	0	0	0									919	0	0	0	0	0	0	0	0	0	0	0	0	0	0	0	0	0	0	0
	920	0	0	0	0	0	0	0	0	0	0	0	0	0	0	0	0	0	0	0	0									920	0	0	0	0	0	0	0	0	0	0	0	0	0	0	0	0	0	0	0
	921	0	0	0	0	0	0	0	0	0	0	0	0	0	0	0	0	0	0	0	0									921	0	0	0	0	0	0	0	0	0	0	0	0	0	0	0	0	0	0	0
	922	0	0	0	0	0	0	0	0	0	0	0	0	0	0	0	0	0	0	0	0									922	0	0	0	0	0	0	0	0	0	0	0	0	0	0	0	0	0	0	0
	923	0	0	0	0	0	0	0	0	0	0	0	0	0	0	0	0	0	0	0	0									923	0	0	0	0	0	0	0	0	0	0	0	0	0	0	0	0	0	0	0
	924	0	0	0	0	0	0	0	0	0	0	0	0	0	0	0	0	0	0	0	0									924	0	0	0	0	0	0	0	0	0	0	0	0	0	0	0	0	0	0	0
	925	0	0	0	0	0	0	0	0	0	0	0	0	0	0	0	0	0	0	0	0									925	0	0	0	0	0	0	0	0	0	0	0	0	0	0	0	0	0	0	0
	926	0	0	0	0	0	0	0	0	0	0	0	0	0	0	0	0	0	0	0	0									926	0	0	0	0	0	0	0	0	0	0	0	0	0	0	0	0	0	0	0
	927	0	0	0	0	0	0	0	0	0	0	0	0	0	0	0	0	0	0	0	0									927	0	0	0	0	0	0	0	0	0	0	0	0	0	0	0	0	0	0	0
	928	0	0	0	0	0	0	0	0	0	0	0	0	0	0	0	0	0	0	0	0									928	0	0	0	0	0	0	0	0	0	0	0	0	0	0	0	0	0	0	0
	929	0	0	0	0	0	0	0	0	0	0	0	0	0	0	0	0	0	0	0	0									929	0	0	0	0	0	0	0	0	0	0	0	0	0	0	0	0	0	0	0
	930	0	0	0	0	0	0	0	0	0	0	0	0	0	0	0	0	0	0	0	0									930	0	0	0	0	0	0	0	0	0	0	0	0	0	0	0	0	0	0	0
	931	0	0	0	0	0	0	0	0	0	0	0	0	0	0	0	0	0	0	0	0									931	0	0	0	0	0	0	0	0	0	0	0	0	0	0	0	0	0	0	0
	932	0	0	0	0	0	0	0	0	0	0	0	0	0	0	0	0	0	0	0	0									932	0	0	0	0	0	0	0	0	0	0	0	0	0	0	0	0	0	0	0
	933	0	0	0	0	0	0	0	0	0	0	0	0	0	0	0	0	0	0	0	0									933	0	0	0	0	0	0	0	0	0	0	0	0	0	0	0	0	0	0	0
	934	0	0	0	0	0	0	0	0	0	0	0	0	0	0	0	0	0	0	0	0									934	0	0	0	0	0	0	0	0	0	0	0	0	0	0	0	0	0	0	0
	935	0	0	0	0	0	0	0	0	0	0	0	0	0	0	0	0	0	0	0	0									935	0	0	0	0	0	0	0	0	0	0	0	0	0	0	0	0	0	0	0
	936	0	0	0	0	0	0	0	0	0	0	0	0	0	0	0	0	0	0	0	0									936	0	0	0	0	0	0	0	0	0	0	0	0	0	0	0	0	0	0	0
	937	0	0	0	0	0	0	0	0	0	0	0	0	0	0	0	0	0	0	0	0									937	0	0	0	0	0	0	0	0	0	0	0	0	0	0	0	0	0	0	0
	938	0	0	0	0	0	0	0	0	0	0	0	0	0	0	0	0	0	0	0	0									938	0	0	0	0	0	0	0	0	0	0	0	0	0	0	0	0	0	0	0
	939	0	0	0	0	0	0	0	0	0	0	0	0	0	0	0	0	0	0	0	0									939	0	0	0	0	0	0	0	0	0	0	0	0	0	0	0	0	0	0	0
	940	0	0	0	0	0	0	0	0	0	0	0	0	0	0	0	0	0	0	0	0									940	0	0	0	0	0	0	0	0	0	0	0	0	0	0	0	0	0	0	0
	941	0	0	0	0	0	0	0	0	0	0	0	0	0	0	0	0	0	0	0	0									941	0	0	0	0	0	0	0	0	0	0	0	0	0	0	0	0	0	0	0
	942	0	0	0	0	0	0	0	0	0	0	0	0	0	0	0	0	0	0	0	0									942	0	0	0	0	0	0	0	0	0	0	0	0	0	0	0	0	0	0	0
	943	0	0	0	0	0	0	0	0	0	0	0	0	0	0	0	0	0	0	0	0									943	0	0	0	0	0	0	0	0	0	0	0	0	0	0	0	0	0	0	0
	944	0	0	0	0	0	0	0	0	0	0	0	0	0	0	0	0	0	0	0	0									944	0	0	0	0	0	0	0	0	0	0	0	0	0	0	0	0	0	0	0
	945	0	0	0	0	0	0	0	0	0	0	0	0	0	0	0	0	0	0	0	0									945	0	0	0	0	0	0	0	0	0	0	0	0	0	0	0	0	0	0	0
	946	0	0	0	0	0	0	0	0	0	0	0	0	0	0	0	0	0	0	0	0									946	0	0	0	0	0	0	0	0	0	0	0	0	0	0	0	0	0	0	0
	947	0	0	0	0	0	0	0	0	0	0	0	0	0	0	0	0	0	0	0	0									947	0	0	0	0	0	0	0	0	0	0	0	0	0	0	0	0	0	0	0
	948	0	0	0	0	0	0	0	0	0	0	0	0	0	0	0	0	0	0	0	0									948	0	0	0	0	0	0	0	0	0	0	0	0	0	0	0	0	0	0	0
	949	0	0	0	0	0	0	0	0	0	0	0	0	0	0	0	0	0	0	0	0									949	0	0	0	0	0	0	0	0	0	0	0	0	0	0	0	0	0	0	0
	950	0	0	0	0	0	0	0	0	0	0	0	0	0	0	0	0	0	0	0	0									950	0	0	0	0	0	0	0	0	0	0	0	0	0	0	0	0	0	0	0
	951	0	0	0	0	0	0	0	0	0	0	0	0	0	0	0	0	0	0	0	0									951	0	0	0	0	0	0	0	0	0	0	0	0	0	0	0	0	0	0	0
	952	0	0	0	0	0	0	0	0	0	0	0	0	0	0	0	0	0	0	0	0									952	0	0	0	0	0	0	0	0	0	0	0	0	0	0	0	0	0	0	0
	953	0	0	0	0	0	0	0	0	0	0	0	0	0	0	0	0	0	0	0	0									953	0	0	0	0	0	0	0	0	0	0	0	0	0	0	0	0	0	0	0
	954	0	0	0	0	0	0	0	0	0	0	0	0	0	0	0	0	0	0	0	0									954	0	0	0	0	0	0	0	0	0	0	0	0	0	0	0	0	0	0	0
	955	0	0	0	0	0	0	0	0	0	0	0	0	0	0	0	0	0	0	0	0									955	0	0	0	0	0	0	0	0	0	0	0	0	0	0	0	0	0	0	0
	956	0	0	0	0	0	0	0	0	0	0	0	0	0	0	0	0	0	0	0	0									956	0	0	0	0	0	0	0	0	0	0	0	0	0	0	0	0	0	0	0
	957	0	0	0	0	0	0	0	0	0	0	0	0	0	0	0	0	0	0	0	0									957	0	0	0	0	0	0	0	0	0	0	0	0	0	0	0	0	0	0	0
	958	0	0	0	0	0	0	0	0	0	0	0	0	0	0	0	0	0	0	0	0									958	0	0	0	0	0	0	0	0	0	0	0	0	0	0	0	0	0	0	0
	959	0	0	0	0	0	0	0	0	0	0	0	0	0	0	0	0	0	0	0	0									959	0	0	0	0	0	0	0	0	0	0	0	0	0	0	0	0	0	0	0
	960	0	0	0	0	0	0	0	0	0	0	0	0	0	0	0	0	0	0	0	0									960	0	0	0	0	0	0	0	0	0	0	0	0	0	0	0	0	0	0	0
	961	0	0	0	0	0	0	0	0	0	0	0	0	0	0	0	0	0	0	0	0									961	0	0	0	0	0	0	0	0	0	0	0	0	0	0	0	0	0	0	0
	962	0	0	0	0	0	0	0	0	0	0	0	0	0	0	0	0	0	0	0	0									962	0	0	0	0	0	0	0	0	0	0	0	0	0	0	0	0	0	0	0
	963	0	0	0	0	0	0	0	0	0	0	0	0	0	0	0	0	0	0	0	0									963	0	0	0	0	0	0	0	0	0	0	0	0	0	0	0	0	0	0	0
	964	0	0	0	0	0	0	0	0	0	0	0	0	0	0	0	0	0	0	0	0									964	0	0	0	0	0	0	0	0	0	0	0	0	0	0	0	0	0	0	0
	965	0	0	0	0	0	0	0	0	0	0	0	0	0	0	0	0	0	0	0	0									965	0	0	0	0	0	0	0	0	0	0	0	0	0	0	0	0	0	0	0
	966	0	0	0	0	0	0	0	0	0	0	0	0	0	0	0	0	0	0	0	0									966	0	0	0	0	0	0	0	0	0	0	0	0	0	0	0	0	0	0	0
	967	0	0	0	0	0	0	0	0	0	0	0	0	0	0	0	0	0	0	0	0									967	0	0	0	0	0	0	0	0	0	0	0	0	0	0	0	0	0	0	0
	968	0	0	0	0	0	0	0	0	0	0	0	0	0	0	0	0	0	0	0	0									968	0	0	0	0	0	0	0	0	0	0	0	0	0	0	0	0	0	0	0
	969	0	0	0	0	0	0	0	0	0	0	0	0	0	0	0	0	0	0	0	0									969	0	0	0	0	0	0	0	0	0	0	0	0	0	0	0	0	0	0	0
	970	0	0	0	0	0	0	0	0	0	0	0	0	0	0	0	0	0	0	0	0									970	0	0	0	0	0	0	0	0	0	0	0	0	0	0	0	0	0	0	0
	971	0	0	0	0	0	0	0	0	0	0	0	0	0	0	0	0	0	0	0	0									971	0	0	0	0	0	0	0	0	0	0	0	0	0	0	0	0	0	0	0
	972	0	0	0	0	0	0	0	0	0	0	0	0	0	0	0	0	0	0	0	0									972	0	0	0	0	0	0	0	0	0	0	0	0	0	0	0	0	0	0	0
	973	0	0	0	0	0	0	0	0	0	0	0	0	0	0	0	0	0	0	0	0									973	0	0	0	0	0	0	0	0	0	0	0	0	0	0	0	0	0	0	0
	974	0	0	0	0	0	0	0	0	0	0	0	0	0	0	0	0	0	0	0	0									974	0	0	0	0	0	0	0	0	0	0	0	0	0	0	0	0	0	0	0
	975	0	0	0	0	0	0	0	0	0	0	0	0	0	0	0	0	0	0	0	0									975	0	0	0	0	0	0	0	0	0	0	0	0	0	0	0	0	0	0	0
	976	0	0	0	0	0	0	0	0	0	0	0	0	0	0	0	0	0	0	0	0									976	0	0	0	0	0	0	0	0	0	0	0	0	0	0	0	0	0	0	0
	977	0	0	0	0	0	0	0	0	0	0	0	0	0	0	0	0	0	0	0	0									977	0	0	0	0	0	0	0	0	0	0	0	0	0	0	0	0	0	0	0
	978	0	0	0	0	0	0	0	0	0	0	0	0	0	0	0	0	0	0	0	0									978	0	0	0	0	0	0	0	0	0	0	0	0	0	0	0	0	0	0	0
	979	0	0	0	0	0	0	0	0	0	0	0	0	0	0	0	0	0	0	0	0									979	0	0	0	0	0	0	0	0	0	0	0	0	0	0	0	0	0	0	0
	980	0	0	0	0	0	0	0	0	0	0	0	0	0	0	0	0	0	0	0	0									980	0	0	0	0	0	0	0	0	0	0	0	0	0	0	0	0	0	0	0
	981	0	0	0	0	0	0	0	0	0	0	0	0	0	0	0	0	0	0	0	0									981	0	0	0	0	0	0	0	0	0	0	0	0	0	0	0	0	0	0	0
	982	0	0	0	0	0	0	0	0	0	0	0	0	0	0	0	0	0	0	0	0									982	0	0	0	0	0	0	0	0	0	0	0	0	0	0	0	0	0	0	0
	983	0	0	0	0	0	0	0	0	0	0	0	0	0	0	0	0	0	0	0	0									983	0	0	0	0	0	0	0	0	0	0	0	0	0	0	0	0	0	0	0
	984	0	0	0	0	0	0	0	0	0	0	0	0	0	0	0	0	0	0	0	0									984	0	0	0	0	0	0	0	0	0	0	0	0	0	0	0	0	0	0	0
	985	0	0	0	0	0	0	0	0	0	0	0	0	0	0	0	0	0	0	0	0									985	0	0	0	0	0	0	0	0	0	0	0	0	0	0	0	0	0	0	0
	986	0	0	0	0	0	0	0	0	0	0	0	0	0	0	0	0	0	0	0	0									986	0	0	0	0	0	0	0	0	0	0	0	0	0	0	0	0	0	0	0
	987	0	0	0	0	0	0	0	0	0	0	0	0	0	0	0	0	0	0	0	0									987	0	0	0	0	0	0	0	0	0	0	0	0	0	0	0	0	0	0	0
	988	0	0	0	0	0	0	0	0	0	0	0	0	0	0	0	0	0	0	0	0									988	0	0	0	0	0	0	0	0	0	0	0	0	0	0	0	0	0	0	0
	989	0	0	0	0	0	0	0	0	0	0	0	0	0	0	0	0	0	0	0	0									989	0	0	0	0	0	0	0	0	0	0	0	0	0	0	0	0	0	0	0
	990	0	0	0	0	0	0	0	0	0	0	0	0	0	0	0	0	0	0	0	0									990	0	0	0	0	0	0	0	0	0	0	0	0	0	0	0	0	0	0	0
	991	0	0	0	0	0	0	0	0	0	0	0	0	0	0	0	0	0	0	0	0									991	0	0	0	0	0	0	0	0	0	0	0	0	0	0	0	0	0	0	0
	992	0	0	0	0	0	0	0	0	0	0	0	0	0	0	0	0	0	0	0	0									992	0	0	0	0	0	0	0	0	0	0	0	0	0	0	0	0	0	0	0
	993	0	0	0	0	0	0	0	0	0	0	0	0	0	0	0	0	0	0	0	0									993	0	0	0	0	0	0	0	0	0	0	0	0	0	0	0	0	0	0	0
	994	0	0	0	0	0	0	0	0	0	0	0	0	0	0	0	0	0	0	0	0									994	0	0	0	0	0	0	0	0	0	0	0	0	0	0	0	0	0	0	0
	995	0	0	0	0	0	0	0	0	0	0	0	0	0	0	0	0	0	0	0	0									995	0	0	0	0	0	0	0	0	0	0	0	0	0	0	0	0	0	0	0
	996	0	0	0	0	0	0	0	0	0	0	0	0	0	0	0	0	0	0	0	0									996	0	0	0	0	0	0	0	0	0	0	0	0	0	0	0	0	0	0	0
	997	0	0	0	0	0	0	0	0	0	0	0	0	0	0	0	0	0	0	0	0									997	0	0	0	0	0	0	0	0	0	0	0	0	0	0	0	0	0	0	0
	998	0	0	0	0	0	0	0	0	0	0	0	0	0	0	0	0	0	0	0	0									998	0	0	0	0	0	0	0	0	0	0	0	0	0	0	0	0	0	0	0
	999	0	0	0	0	0	0	0	0	0	0	0	0	0	0	0	0	0	0	0	0									999	0	0	0	0	0	0	0	0	0	0	0	0	0	0	0	0	0	0	0
	1000	0	0	0	0	0	0	0	0	0	0	0	0	0	0	0	0	0	0	0	0									1000	0	0	0	0	0	0	0	0	0	0	0	0	0	0	0	0	0	0	0
	1001	0	0	0	0	0	0	0	0	0	0	0	0	0	0	0	0	0	0	0	0									1001	0	0	0	0	0	0	0	0	0	0	0	0	0	0	0	0	0	0	0
	1002	0	0	0	0	0	0	0	0	0	0	0	0	0	0	0	0	0	0	0	0									1002	0	0	0	0	0	0	0	0	0	0	0	0	0	0	0	0	0	0	0
	1003	0	0	0	0	0	0	0	0	0	0	0	0	0	0	0	0	0	0	0	0									1003	0	0	0	0	0	0	0	0	0	0	0	0	0	0	0	0	0	0	0
	1004	0	0	0	0	0	0	0	0	0	0	0	0	0	0	0	0	0	0	0	0									1004	0	0	0	0	0	0	0	0	0	0	0	0	0	0	0	0	0	0	0
	1005	0	0	0	0	0	0	0	0	0	0	0	0	0	0	0	0	0	0	0	0									1005	0	0	0	0	0	0	0	0	0	0	0	0	0	0	0	0	0	0	0
	1006	0	0	0	0	0	0	0	0	0	0	0	0	0	0	0	0	0	0	0	0									1006	0	0	0	0	0	0	0	0	0	0	0	0	0	0	0	0	0	0	0
	1007	0	0	0	0	0	0	0	0	0	0	0	0	0	0	0	0	0	0	0	0									1007	0	0	0	0	0	0	0	0	0	0	0	0	0	0	0	0	0	0	0
	1008	0	0	0	0	0	0	0	0	0	0	0	0	0	0	0	0	0	0	0	0									1008	0	0	0	0	0	0	0	0	0	0	0	0	0	0	0	0	0	0	0
	1009	0	0	0	0	0	0	0	0	0	0	0	0	0	0	0	0	0	0	0	0									1009	0	0	0	0	0	0	0	0	0	0	0	0	0	0	0	0	0	0	0
	1010	0	0	0	0	0	0	0	0	0	0	0	0	0	0	0	0	0	0	0	0									1010	0	0	0	0	0	0	0	0	0	0	0	0	0	0	0	0	0	0	0
	1011	0	0	0	0	0	0	0	0	0	0	0	0	0	0	0	0	0	0	0	0									1011	0	0	0	0	0	0	0	0	0	0	0	0	0	0	0	0	0	0	0
	1012	0	0	0	0	0	0	0	0	0	0	0	0	0	0	0	0	0	0	0	0									1012	0	0	0	0	0	0	0	0	0	0	0	0	0	0	0	0	0	0	0
	1013	0	0	0	0	0	0	0	0	0	0	0	0	0	0	0	0	0	0	0	0									1013	0	0	0	0	0	0	0	0	0	0	0	0	0	0	0	0	0	0	0
	1014	0	0	0	0	0	0	0	0	0	0	0	0	0	0	0	0	0	0	0	0									1014	0	0	0	0	0	0	0	0	0	0	0	0	0	0	0	0	0	0	0
	1015	0	0	0	0	0	0	0	0	0	0	0	0	0	0	0	0	0	0	0	0									1015	0	0	0	0	0	0	0	0	0	0	0	0	0	0	0	0	0	0	0
	1016	0	0	0	0	0	0	0	0	0	0	0	0	0	0	0	0	0	0	0	0									1016	0	0	0	0	0	0	0	0	0	0	0	0	0	0	0	0	0	0	0
	1017	0	0	0	0	0	0	0	0	0	0	0	0	0	0	0	0	0	0	0	0									1017	0	0	0	0	0	0	0	0	0	0	0	0	0	0	0	0	0	0	0
	1018	0	0	0	0	0	0	0	0	0	0	0	0	0	0	0	0	0	0	0	0									1018	0	0	0	0	0	0	0	0	0	0	0	0	0	0	0	0	0	0	0
	1019	0	0	0	0	0	0	0	0	0	0	0	0	0	0	0	0	0	0	0	0									1019	0	0	0	0	0	0	0	0	0	0	0	0	0	0	0	0	0	0	0
	1020	0	0	0	0	0	0	0	0	0	0	0	0	0	0	0	0	0	0	0	0									1020	0	0	0	0	0	0	0	0	0	0	0	0	0	0	0	0	0	0	0
	1021	0	0	0	0	0	0	0	0	0	0	0	0	0	0	0	0	0	0	0	0									1021	0	0	0	0	0	0	0	0	0	0	0	0	0	0	0	0	0	0	0
	1022	0	0	0	0	0	0	0	0	0	0	0	0	0	0	0	0	0	0	0	0									1022	0	0	0	0	0	0	0	0	0	0	0	0	0	0	0	0	0	0	0
	1023	0	0	0	0	0	0	0	0	0	0	0	0	0	0	0	0	0	0	0	0									1023	0	0	0	0	0	0	0	0	0	0	0	0	0	0	0	0	0	0	0
	1024	0	0	0	0	0	0	0	0	0	0	0	0	0	0	0	0	0	0	0	0									1024	0	0	0	0	0	0	0	0	0	0	0	0	0	0	0	0	0	0	0
	1025	0	0	0	0	0	0	0	0	0	0	0	0	0	0	0	0	0	0	0	0									1025	0	0	0	0	0	0	0	0	0	0	0	0	0	0	0	0	0	0	0
	1026	0	0	0	0	0	0	0	0	0	0	0	0	0	0	0	0	0	0	0	0									1026	0	0	0	0	0	0	0	0	0	0	0	0	0	0	0	0	0	0	0
	1027	0	0	0	0	0	0	0	0	0	0	0	0	0	0	0	0	0	0	0	0									1027	0	0	0	0	0	0	0	0	0	0	0	0	0	0	0	0	0	0	0
	1028	0	0	0	0	0	0	0	0	0	0	0	0	0	0	0	0	0	0	0	0									1028	0	0	0	0	0	0	0	0	0	0	0	0	0	0	0	0	0	0	0
	1029	0	0	0	0	0	0	0	0	0	0	0	0	0	0	0	0	0	0	0	0									1029	0	0	0	0	0	0	0	0	0	0	0	0	0	0	0	0	0	0	0
	1030	0	0	0	0	0	0	0	0	0	0	0	0	0	0	0	0	0	0	0	0									1030	0	0	0	0	0	0	0	0	0	0	0	0	0	0	0	0	0	0	0
	1031	0	0	0	0	0	0	0	0	0	0	0	0	0	0	0	0	0	0	0	0									1031	0	0	0	0	0	0	0	0	0	0	0	0	0	0	0	0	0	0	0
	1032	0	0	0	0	0	0	0	0	0	0	0	0	0	0	0	0	0	0	0	0									1032	0	0	0	0	0	0	0	0	0	0	0	0	0	0	0	0	0	0	0
	1033	0	0	0	0	0	0	0	0	0	0	0	0	0	0	0	0	0	0	0	0									1033	0	0	0	0	0	0	0	0	0	0	0	0	0	0	0	0	0	0	0
	1034	0	0	0	0	0	0	0	0	0	0	0	0	0	0	0	0	0	0	0	0									1034	0	0	0	0	0	0	0	0	0	0	0	0	0	0	0	0	0	0	0
	1035	0	0	0	0	0	0	0	0	0	0	0	0	0	0	0	0	0	0	0	0									1035	0	0	0	0	0	0	0	0	0	0	0	0	0	0	0	0	0	0	0
	1036	0	0	0	0	0	0	0	0	0	0	0	0	0	0	0	0	0	0	0	0									1036	0	0	0	0	0	0	0	0	0	0	0	0	0	0	0	0	0	0	0
	1037	0	0	0	0	0	0	0	0	0	0	0	0	0	0	0	0	0	0	0	0									1037	0	0	0	0	0	0	0	0	0	0	0	0	0	0	0	0	0	0	0
	1038	0	0	0	0	0	0	0	0	0	0	0	0	0	0	0	0	0	0	0	0									1038	0	0	0	0	0	0	0	0	0	0	0	0	0	0	0	0	0	0	0
	1039	0	0	0	0	0	0	0	0	0	0	0	0	0	0	0	0	0	0	0	0									1039	0	0	0	0	0	0	0	0	0	0	0	0	0	0	0	0	0	0	0
	1040	0	0	0	0	0	0	0	0	0	0	0	0	0	0	0	0	0	0	0	0									1040	0	0	0	0	0	0	0	0	0	0	0	0	0	0	0	0	0	0	0
	1041	0	0	0	0	0	0	0	0	0	0	0	0	0	0	0	0	0	0	0	0									1041	0	0	0	0	0	0	0	0	0	0	0	0	0	0	0	0	0	0	0
	1042	0	0	0	0	0	0	0	0	0	0	0	0	0	0	0	0	0	0	0	0									1042	0	0	0	0	0	0	0	0	0	0	0	0	0	0	0	0	0	0	0
	1043	0	0	0	0	0	0	0	0	0	0	0	0	0	0	0	0	0	0	0	0									1043	0	0	0	0	0	0	0	0	0	0	0	0	0	0	0	0	0	0	0
	1044	0	0	0	0	0	0	0	0	0	0	0	0	0	0	0	0	0	0	0	0									1044	0	0	0	0	0	0	0	0	0	0	0	0	0	0	0	0	0	0	0
	1045	0	0	0	0	0	0	0	0	0	0	0	0	0	0	0	0	0	0	0	0									1045	0	0	0	0	0	0	0	0	0	0	0	0	0	0	0	0	0	0	0
	1046	0	0	0	0	0	0	0	0	0	0	0	0	0	0	0	0	0	0	0	0									1046	0	0	0	0	0	0	0	0	0	0	0	0	0	0	0	0	0	0	0
	1047	0	0	0	0	0	0	0	0	0	0	0	0	0	0	0	0	0	0	0	0									1047	0	0	0	0	0	0	0	0	0	0	0	0	0	0	0	0	0	0	0
	1048	0	0	0	0	0	0	0	0	0	0	0	0	0	0	0	0	0	0	0	0									1048	0	0	0	0	0	0	0	0	0	0	0	0	0	0	0	0	0	0	0
	1049	0	0	0	0	0	0	0	0	0	0	0	0	0	0	0	0	0	0	0	0									1049	0	0	0	0	0	0	0	0	0	0	0	0	0	0	0	0	0	0	0
	1050	0	0	0	0	0	0	0	0	0	0	0	0	0	0	0	0	0	0	0	0									1050	0	0	0	0	0	0	0	0	0	0	0	0	0	0	0	0	0	0	0
	1051	0	0	0	0	0	0	0	0	0	0	0	0	0	0	0	0	0	0	0	0									1051	0	0	0	0	0	0	0	0	0	0	0	0	0	0	0	0	0	0	0
	1052	0	0	0	0	0	0	0	0	0	0	0	0	0	0	0	0	0	0	0	0									1052	0	0	0	0	0	0	0	0	0	0	0	0	0	0	0	0	0	0	0
	1053	0	0	0	0	0	0	0	0	0	0	0	0	0	0	0	0	0	0	0	0									1053	0	0	0	0	0	0	0	0	0	0	0	0	0	0	0	0	0	0	0
	1054	0	0	0	0	0	0	0	0	0	0	0	0	0	0	0	0	0	0	0	0									1054	0	0	0	0	0	0	0	0	0	0	0	0	0	0	0	0	0	0	0
	1055	0	0	0	0	0	0	0	0	0	0	0	0	0	0	0	0	0	0	0	0									1055	0	0	0	0	0	0	0	0	0	0	0	0	0	0	0	0	0	0	0
	1056	0	0	0	0	0	0	0	0	0	0	0	0	0	0	0	0	0	0	0	0									1056	0	0	0	0	0	0	0	0	0	0	0	0	0	0	0	0	0	0	0
	1057	0	0	0	0	0	0	0	0	0	0	0	0	0	0	0	0	0	0	0	0									1057	0	0	0	0	0	0	0	0	0	0	0	0	0	0	0	0	0	0	0
	1058	0	0	0	0	0	0	0	0	0	0	0	0	0	0	0	0	0	0	0	0									1058	0	0	0	0	0	0	0	0	0	0	0	0	0	0	0	0	0	0	0
	1059	0	0	0	0	0	0	0	0	0	0	0	0	0	0	0	0	0	0	0	0									1059	0	0	0	0	0	0	0	0	0	0	0	0	0	0	0	0	0	0	0
	1060	0	0	0	0	0	0	0	0	0	0	0	0	0	0	0	0	0	0	0	0									1060	0	0	0	0	0	0	0	0	0	0	0	0	0	0	0	0	0	0	0
	1061	0	0	0	0	0	0	0	0	0	0	0	0	0	0	0	0	0	0	0	0									1061	0	0	0	0	0	0	0	0	0	0	0	0	0	0	0	0	0	0	0
	1062	0	0	0	0	0	0	0	0	0	0	0	0	0	0	0	0	0	0	0	0									1062	0	0	0	0	0	0	0	0	0	0	0	0	0	0	0	0	0	0	0
	1063	0	0	0	0	0	0	0	0	0	0	0	0	0	0	0	0	0	0	0	0									1063	0	0	0	0	0	0	0	0	0	0	0	0	0	0	0	0	0	0	0
	1064	0	0	0	0	0	0	0	0	0	0	0	0	0	0	0	0	0	0	0	0									1064	0	0	0	0	0	0	0	0	0	0	0	0	0	0	0	0	0	0	0
	1065	0	0	0	0	0	0	0	0	0	0	0	0	0	0	0	0	0	0	0	0									1065	0	0	0	0	0	0	0	0	0	0	0	0	0	0	0	0	0	0	0
	1066	0	0	0	0	0	0	0	0	0	0	0	0	0	0	0	0	0	0	0	0									1066	0	0	0	0	0	0	0	0	0	0	0	0	0	0	0	0	0	0	0
	1067	0	0	0	0	0	0	0	0	0	0	0	0	0	0	0	0	0	0	0	0									1067	0	0	0	0	0	0	0	0	0	0	0	0	0	0	0	0	0	0	0
	1068	0	0	0	0	0	0	0	0	0	0	0	0	0	0	0	0	0	0	0	0									1068	0	0	0	0	0	0	0	0	0	0	0	0	0	0	0	0	0	0	0
	1069	0	0	0	0	0	0	0	0	0	0	0	0	0	0	0	0	0	0	0	0									1069	0	0	0	0	0	0	0	0	0	0	0	0	0	0	0	0	0	0	0
	1070	0	0	0	0	0	0	0	0	0	0	0	0	0	0	0	0	0	0	0	0
	1071	0	0	0	0	0	0	0	0	0	0	0	0	0	0	0	0	0	0	0	0
	1072	0	0	0	0	0	0	0	0	0	0	0	0	0	0	0	0	0	0	0	0
	1073	0	0	0	0	0	0	0	0	0	0	0	0	0	0	0	0	0	0	0	0
	1074	0	0	0	0	0	0	0	0	0	0	0	0	0	0	0	0	0	0	0	0
	1075	0	0	0	0	0	0	0	0	0	0	0	0	0	0	0	0	0	0	0	0
	1076	0	0	0	0	0	0	0	0	0	0	0	0	0	0	0	0	0	0	0	0
	1077	0	0	0	0	0	0	0	0	0	0	0	0	0	0	0	0	0	0	0	0
	1078	0	0	0	0	0	0	0	0	0	0	0	0	0	0	0	0	0	0	0	0
	1079	0	0	0	0	0	0	0	0	0	0	0	0	0	0	0	0	0	0	0	0
	1080	0	0	0	0	0	0	0	0	0	0	0	0	0	0	0	0	0	0	0	0
	1081	0	0	0	0	0	0	0	0	0	0	0	0	0	0	0	0	0	0	0	0
	1082	0	0	0	0	0	0	0	0	0	0	0	0	0	0	0	0	0	0	0	0
	1083	0	0	0	0	0	0	0	0	0	0	0	0	0	0	0	0	0	0	0	0
	1084	0	0	0	0	0	0	0	0	0	0	0	0	0	0	0	0	0	0	0	0
	1085	0	0	0	0	0	0	0	0	0	0	0	0	0	0	0	0	0	0	0	0
	1086	0	0	0	0	0	0	0	0	0	0	0	0	0	0	0	0	0	0	0	0
	1087	0	0	0	0	0	0	0	0	0	0	0	0	0	0	0	0	0	0	0	0
	1088	0	0	0	0	0	0	0	0	0	0	0	0	0	0	0	0	0	0	0	0
	1089	0	0	0	0	0	0	0	0	0	0	0	0	0	0	0	0	0	0	0	0
	1090	0	0	0	0	0	0	0	0	0	0	0	0	0	0	0	0	0	0	0	0
	1091	0	0	0	0	0	0	0	0	0	0	0	0	0	0	0	0	0	0	0	0
	1092	0	0	0	0	0	0	0	0	0	0	0	0	0	0	0	0	0	0	0	0
	1093	0	0	0	0	0	0	0	0	0	0	0	0	0	0	0	0	0	0	0	0
	1094	0	0	0	0	0	0	0	0	0	0	0	0	0	0	0	0	0	0	0	0
	1095	0	0	0	0	0	0	0	0	0	0	0	0	0	0	0	0	0	0	0	0
	1096	0	0	0	0	0	0	0	0	0	0	0	0	0	0	0	0	0	0	0	0
	1097	0	0	0	0	0	0	0	0	0	0	0	0	0	0	0	0	0	0	0	0
	1098	0	0	0	0	0	0	0	0	0	0	0	0	0	0	0	0	0	0	0	0
	1099	0	0	0	0	0	0	0	0	0	0	0	0	0	0	0	0	0	0	0	0
	1100	0	0	0	0	0	0	0	0	0	0	0	0	0	0	0	0	0	0	0	0
	1101	0	0	0	0	0	0	0	0	0	0	0	0	0	0	0	0	0	0	0	0
	1102	0	0	0	0	0	0	0	0	0	0	0	0	0	0	0	0	0	0	0	0
	1103	0	0	0	0	0	0	0	0	0	0	0	0	0	0	0	0	0	0	0	0
	1104	0	0	0	0	0	0	0	0	0	0	0	0	0	0	0	0	0	0	0	0
	1105	0	0	0	0	0	0	0	0	0	0	0	0	0	0	0	0	0	0	0	0
	1106	0	0	0	0	0	0	0	0	0	0	0	0	0	0	0	0	0	0	0	0
	1107	0	0	0	0	0	0	0	0	0	0	0	0	0	0	0	0	0	0	0	0
	1108	0	0	0	0	0	0	0	0	0	0	0	0	0	0	0	0	0	0	0	0
	1109	0	0	0	0	0	0	0	0	0	0	0	0	0	0	0	0	0	0	0	0
	1110	0	0	0	0	0	0	0	0	0	0	0	0	0	0	0	0	0	0	0	0
	1111	0	0	0	0	0	0	0	0	0	0	0	0	0	0	0	0	0	0	0	0
	1112	0	0	0	0	0	0	0	0	0	0	0	0	0	0	0	0	0	0	0	0
	1113	0	0	0	0	0	0	0	0	0	0	0	0	0	0	0	0	0	0	0	0
	1114	0	0	0	0	0	0	0	0	0	0	0	0	0	0	0	0	0	0	0	0
	1115	0	0	0	0	0	0	0	0	0	0	0	0	0	0	0	0	0	0	0	0
	1116	0	0	0	0	0	0	0	0	0	0	0	0	0	0	0	0	0	0	0	0
	1117	0	0	0	0	0	0	0	0	0	0	0	0	0	0	0	0	0	0	0	0
	1118	0	0	0	0	0	0	0	0	0	0	0	0	0	0	0	0	0	0	0	0
	1119	0	0	0	0	0	0	0	0	0	0	0	0	0	0	0	0	0	0	0	0
	1120	0	0	0	0	0	0	0	0	0	0	0	0	0	0	0	0	0	0	0	0
	1121	0	0	0	0	0	0	0	0	0	0	0	0	0	0	0	0	0	0	0	0
	1122	0	0	0	0	0	0	0	0	0	0	0	0	0	0	0	0	0	0	0	0
	1123	0	0	0	0	0	0	0	0	0	0	0	0	0	0	0	0	0	0	0	0
	1124	0	0	0	0	0	0	0	0	0	0	0	0	0	0	0	0	0	0	0	0
	1125	0	0	0	0	0	0	0	0	0	0	0	0	0	0	0	0	0	0	0	0
	1126	0	0	0	0	0	0	0	0	0	0	0	0	0	0	0	0	0	0	0	0
	1127	0	0	0	0	0	0	0	0	0	0	0	0	0	0	0	0	0	0	0	0
	1128	0	0	0	0	0	0	0	0	0	0	0	0	0	0	0	0	0	0	0	0
	1129	0	0	0	0	0	0	0	0	0	0	0	0	0	0	0	0	0	0	0	0
	1130	0	0	0	0	0	0	0	0	0	0	0	0	0	0	0	0	0	0	0	0
	1131	0	0	0	0	0	0	0	0	0	0	0	0	0	0	0	0	0	0	0	0
	1132	0	0	0	0	0	0	0	0	0	0	0	0	0	0	0	0	0	0	0	0
	1133	0	0	0	0	0	0	0	0	0	0	0	0	0	0	0	0	0	0	0	0
	1134	0	0	0	0	0	0	0	0	0	0	0	0	0	0	0	0	0	0	0	0
	1135	0	0	0	0	0	0	0	0	0	0	0	0	0	0	0	0	0	0	0	0
	1136	0	0	0	0	0	0	0	0	0	0	0	0	0	0	0	0	0	0	0	0
	1137	0	0	0	0	0	0	0	0	0	0	0	0	0	0	0	0	0	0	0	0
	1138	0	0	0	0	0	0	0	0	0	0	0	0	0	0	0	0	0	0	0	0
	1139	0	0	0	0	0	0	0	0	0	0	0	0	0	0	0	0	0	0	0	0
	1140	0	0	0	0	0	0	0	0	0	0	0	0	0	0	0	0	0	0	0	0
	1141	0	0	0	0	0	0	0	0	0	0	0	0	0	0	0	0	0	0	0	0
	1142	0	0	0	0	0	0	0	0	0	0	0	0	0	0	0	0	0	0	0	0
	1143	0	0	0	0	0	0	0	0	0	0	0	0	0	0	0	0	0	0	0	0
	1144	0	0	0	0	0	0	0	0	0	0	0	0	0	0	0	0	0	0	0	0
	1145	0	0	0	0	0	0	0	0	0	0	0	0	0	0	0	0	0	0	0	0
	1146	0	0	0	0	0	0	0	0	0	0	0	0	0	0	0	0	0	0	0	0
	1147	0	0	0	0	0	0	0	0	0	0	0	0	0	0	0	0	0	0	0	0
	1148	0	0	0	0	0	0	0	0	0	0	0	0	0	0	0	0	0	0	0	0
	1149	0	0	0	0	0	0	0	0	0	0	0	0	0	0	0	0	0	0	0	0
	1150	0	0	0	0	0	0	0	0	0	0	0	0	0	0	0	0	0	0	0	0
	1151	0	0	0	0	0	0	0	0	0	0	0	0	0	0	0	0	0	0	0	0
	1152	0	0	0	0	0	0	0	0	0	0	0	0	0	0	0	0	0	0	0	0
	1153	0	0	0	0	0	0	0	0	0	0	0	0	0	0	0	0	0	0	0	0
	1154	0	0	0	0	0	0	0	0	0	0	0	0	0	0	0	0	0	0	0	0
	1155	0	0	0	0	0	0	0	0	0	0	0	0	0	0	0	0	0	0	0	0
	1156	0	0	0	0	0	0	0	0	0	0	0	0	0	0	0	0	0	0	0	0
	1157	0	0	0	0	0	0	0	0	0	0	0	0	0	0	0	0	0	0	0	0
	1158	0	0	0	0	0	0	0	0	0	0	0	0	0	0	0	0	0	0	0	0
	1159	0	0	0	0	0	0	0	0	0	0	0	0	0	0	0	0	0	0	0	0
	1160	0	0	0	0	0	0	0	0	0	0	0	0	0	0	0	0	0	0	0	0
	1161	0	0	0	0	0	0	0	0	0	0	0	0	0	0	0	0	0	0	0	0
	1162	0	0	0	0	0	0	0	0	0	0	0	0	0	0	0	0	0	0	0	0
	1163	0	0	0	0	0	0	0	0	0	0	0	0	0	0	0	0	0	0	0	0
	1164	0	0	0	0	0	0	0	0	0	0	0	0	0	0	0	0	0	0	0	0
	1165	0	0	0	0	0	0	0	0	0	0	0	0	0	0	0	0	0	0	0	0
	1166	0	0	0	0	0	0	0	0	0	0	0	0	0	0	0	0	0	0	0	0
	1167	0	0	0	0	0	0	0	0	0	0	0	0	0	0	0	0	0	0	0	0
	1168	0	0	0	0	0	0	0	0	0	0	0	0	0	0	0	0	0	0	0	0
	1169	0	0	0	0	0	0	0	0	0	0	0	0	0	0	0	0	0	0	0	0
	1170	0	0	0	0	0	0	0	0	0	0	0	0	0	0	0	0	0	0	0	0
	1171	0	0	0	0	0	0	0	0	0	0	0	0	0	0	0	0	0	0	0	0
	1172	0	0	0	0	0	0	0	0	0	0	0	0	0	0	0	0	0	0	0	0
	1173	0	0	0	0	0	0	0	0	0	0	0	0	0	0	0	0	0	0	0	0
	1174	0	0	0	0	0	0	0	0	0	0	0	0	0	0	0	0	0	0	0	0
	1175	0	0	0	0	0	0	0	0	0	0	0	0	0	0	0	0	0	0	0	0
	1176	0	0	0	0	0	0	0	0	0	0	0	0	0	0	0	0	0	0	0	0
	1177	0	0	0	0	0	0	0	0	0	0	0	0	0	0	0	0	0	0	0	0
	1178	0	0	0	0	0	0	0	0	0	0	0	0	0	0	0	0	0	0	0	0
	1179	0	0	0	0	0	0	0	0	0	0	0	0	0	0	0	0	0	0	0	0
	1180	0	0	0	0	0	0	0	0	0	0	0	0	0	0	0	0	0	0	0	0
	1181	0	0	0	0	0	0	0	0	0	0	0	0	0	0	0	0	0	0	0	0
	1182	0	0	0	0	0	0	0	0	0	0	0	0	0	0	0	0	0	0	0	0
	1183	0	0	0	0	0	0	0	0	0	0	0	0	0	0	0	0	0	0	0	0
	1184	0	0	0	0	0	0	0	0	0	0	0	0	0	0	0	0	0	0	0	0
	1185	0	0	0	0	0	0	0	0	0	0	0	0	0	0	0	0	0	0	0	0
	1186	0	0	0	0	0	0	0	0	0	0	0	0	0	0	0	0	0	0	0	0
	1187	0	0	0	0	0	0	0	0	0	0	0	0	0	0	0	0	0	0	0	0
	1188	0	0	0	0	0	0	0	0	0	0	0	0	0	0	0	0	0	0	0	0
	1189	0	0	0	0	0	0	0	0	0	0	0	0	0	0	0	0	0	0	0	0
	1190	0	0	0	0	0	0	0	0	0	0	0	0	0	0	0	0	0	0	0	0
	1191	0	0	0	0	0	0	0	0	0	0	0	0	0	0	0	0	0	0	0	0
	1192	0	0	0	0	0	0	0	0	0	0	0	0	0	0	0	0	0	0	0	0
	1193	0	0	0	0	0	0	0	0	0	0	0	0	0	0	0	0	0	0	0	0
	1194	0	0	0	0	0	0	0	0	0	0	0	0	0	0	0	0	0	0	0	0
	1195	0	0	0	0	0	0	0	0	0	0	0	0	0	0	0	0	0	0	0	0
	1196	0	0	0	0	0	0	0	0	0	0	0	0	0	0	0	0	0	0	0	0
	1197	0	0	0	0	0	0	0	0	0	0	0	0	0	0	0	0	0	0	0	0
	1198	0	0	0	0	0	0	0	0	0	0	0	0	0	0	0	0	0	0	0	0
	1199	0	0	0	0	0	0	0	0	0	0	0	0	0	0	0	0	0	0	0	0
	1200	0	0	0	0	0	0	0	0	0	0	0	0	0	0	0	0	0	0	0	0
	1201	0	0	0	0	0	0	0	0	0	0	0	0	0	0	0	0	0	0	0	0
	1202	0	0	0	0	0	0	0	0	0	0	0	0	0	0	0	0	0	0	0	0
	1203	0	0	0	0	0	0	0	0	0	0	0	0	0	0	0	0	0	0	0	0
	1204	0	0	0	0	0	0	0	0	0	0	0	0	0	0	0	0	0	0	0	0
	1205	0	0	0	0	0	0	0	0	0	0	0	0	0	0	0	0	0	0	0	0
	1206	0	0	0	0	0	0	0	0	0	0	0	0	0	0	0	0	0	0	0	0
	1207	0	0	0	0	0	0	0	0	0	0	0	0	0	0	0	0	0	0	0	0
	1208	0	0	0	0	0	0	0	0	0	0	0	0	0	0	0	0	0	0	0	0
	1209	0	0	0	0	0	0	0	0	0	0	0	0	0	0	0	0	0	0	0	0
	1210	0	0	0	0	0	0	0	0	0	0	0	0	0	0	0	0	0	0	0	0
	1211	0	0	0	0	0	0	0	0	0	0	0	0	0	0	0	0	0	0	0	0
	1212	0	0	0	0	0	0	0	0	0	0	0	0	0	0	0	0	0	0	0	0
	1213	0	0	0	0	0	0	0	0	0	0	0	0	0	0	0	0	0	0	0	0										0	0	0	0	0	0	0	0	0	0	0	0	0	0	0	0	0	0	0
	1214	0	0	0	0	0	0	0	0	0	0	0	0	0	0	0	0	0	0	0	0										0	0	0	0	0	0	0	0	0	0	0	0	0	0	0	0	0	0	0
	1215	0	0	0	0	0	0	0	0	0	0	0	0	0	0	0	0	0	0	0	0										0	0	0	0	0	0	0	0	0	0	0	0	0	0	0	0	0	0	0
	1216	0	0	0	0	0	0	0	0	0	0	0	0	0	0	0	0	0	0	0	0										0	0	0	0	0	0	0	0	0	0	0	0	0	0	0	0	0	0	0
	1217	0	0	0	0	0	0	0	0	0	0	0	0	0	0	0	0	0	0	0	0										0	0	0	0	0	0	0	0	0	0	0	0	0	0	0	0	0	0	0
																															0	0	0	0	0	0	0	0	0	0	0	0	0	0	0	0	0	0	0
SUM	609	156	72	96	168	216	214	224	132	108	80	120	200	680	1560	2600	79.99	80.01	0	-40	-120									571915	2171	936	1306	2240	2864	2963.51	3065.99	1842	1494	880	1370	2350	8230	19010	31750	879.877	880.123	100	-290
CN X SUM OF ELEM.		2028	936	1248	2184	2808	2782.01	2911.99	1716	1404	880	1320	2200	7480	17160	28600	879.89	880.11	0	-440	-1320
		7	8	9	10	11	12	13	14	15	16	17	18	19	20	21	22	23	24	25	26
	SC	0.934132	1	0.95559	0.975	0.980447	0.938754	0.949772	0.931596	0.939759	1	0.963504	0.93617	0.90887	0.902683	0.900787	1.00001	0.999986	0	1.51724	1.23364
[truncated: 3 more columns]

## Sheet: 02
	OPTINALYSIS: SEQUENCE ANALYSIS THROUGH A LOOKING-GLASS
	CN = Central node; Kc = Kabirian coefficient of similarity; %Sim. = Percentage similarity; %Dsim. = Percentage dissimilarity																NUM. = Numeration; DEN. = Denumeration
				For Kc >1		For Kc <1
	RESULTS	CN	Kc	%Sim.	%Dsim.	%Sim.	%Dsim.										NUM	DEN		NUM	DEN
	Seq. 1U	11	1.14783	59.0361	40.9639	169.388	-69.3878										85.2174	1.44348		-144.348	-0.852174
	Seq. 1V	11	1.17552	54.0091	45.9909	185.154	-85.1538										82.4481	1.52656		-152.656	-0.824481
	Seq. 1W	11	1.1846	52.478	47.522	190.556	-90.5562										81.5401	1.5538		-155.38	-0.815401
	Seq. 1X	11	0.925214	138.567	-38.5675	72.167	27.833										107.479	0.775641		-77.5641	-1.07479
	Seq. 1Y	11	0.925254	138.541	-38.541	72.1808	27.8192										107.475	0.775761		-77.5761	-1.07475
	Seq.	0	#DIV/0!	#DIV/0!	#DIV/0!	#DIV/0!	#DIV/0!										#DIV/0!	#DIV/0!		#DIV/0!	#DIV/0!
	Seq.	0	#DIV/0!	#DIV/0!	#DIV/0!	#DIV/0!	#DIV/0!										#DIV/0!	#DIV/0!		#DIV/0!	#DIV/0!
	Seq.	0	#DIV/0!	#DIV/0!	#DIV/0!	#DIV/0!	#DIV/0!										#DIV/0!	#DIV/0!		#DIV/0!	#DIV/0!
	Seq.	0	#DIV/0!	#DIV/0!	#DIV/0!	#DIV/0!	#DIV/0!										#DIV/0!	#DIV/0!		#DIV/0!	#DIV/0!
	Seq.	0	#DIV/0!	#DIV/0!	#DIV/0!	#DIV/0!	#DIV/0!										#DIV/0!	#DIV/0!		#DIV/0!	#DIV/0!
	Seq.	0	#DIV/0!	#DIV/0!	#DIV/0!	#DIV/0!	#DIV/0!										#DIV/0!	#DIV/0!		#DIV/0!	#DIV/0!
	Seq.	0	#DIV/0!	#DIV/0!	#DIV/0!	#DIV/0!	#DIV/0!										#DIV/0!	#DIV/0!		#DIV/0!	#DIV/0!
	Seq.	0	#DIV/0!	#DIV/0!	#DIV/0!	#DIV/0!	#DIV/0!										#DIV/0!	#DIV/0!		#DIV/0!	#DIV/0!
	Seq.	0	#DIV/0!	#DIV/0!	#DIV/0!	#DIV/0!	#DIV/0!										#DIV/0!	#DIV/0!		#DIV/0!	#DIV/0!
	Seq.	0	#DIV/0!	#DIV/0!	#DIV/0!	#DIV/0!	#DIV/0!										#DIV/0!	#DIV/0!		#DIV/0!	#DIV/0!
	Seq.	0	#DIV/0!	#DIV/0!	#DIV/0!	#DIV/0!	#DIV/0!										#DIV/0!	#DIV/0!		#DIV/0!	#DIV/0!
	Seq.	0	#DIV/0!	#DIV/0!	#DIV/0!	#DIV/0!	#DIV/0!										#DIV/0!	#DIV/0!		#DIV/0!	#DIV/0!
	Seq.	0	#DIV/0!	#DIV/0!	#DIV/0!	#DIV/0!	#DIV/0!										#DIV/0!	#DIV/0!		#DIV/0!	#DIV/0!
	Seq.	0	#DIV/0!	#DIV/0!	#DIV/0!	#DIV/0!	#DIV/0!										#DIV/0!	#DIV/0!		#DIV/0!	#DIV/0!
	Seq.	0	#DIV/0!	#DIV/0!	#DIV/0!	#DIV/0!	#DIV/0!										#DIV/0!	#DIV/0!		#DIV/0!	#DIV/0!
	SEQUENCES	INPUT SEQUENCE																												SEQUENCES	COMPUTATION AND CALCULATIONS
	QUANTITATIVE SCALE	Seq. 1U	Seq. 1V	Seq. 1W	Seq. 1X	Seq. 1Y	Seq.	Seq.	Seq.	Seq.	Seq.	Seq.	Seq.	Seq.	Seq.	Seq.	Seq.	Seq.	Seq.	Seq.	Seq.									QUANTITATIVE SCALE	Seq. 1U	Seq. 1V	Seq. 1W	Seq. 1X	Seq. 1Y	Seq.	Seq.	Seq.	Seq.	Seq.	Seq.	Seq.	Seq.	Seq.	Seq.	Seq.	Seq.	Seq.	Seq.
	1	-64	-152	-256	-3.999	-4.001	0	0	0	0	0	0	0	0	0	0	0	0	0	0	0									1	-64	-152	-256	-3.999	-4.001	0	0	0	0	0	0	0	0	0	0	0	0	0	0
	2	-64	-152	-256	-3.999	-4.001	0	0	0	0	0	0	0	0	0	0	0	0	0	0	0									2	-128	-304	-512	-7.998	-8.002	0	0	0	0	0	0	0	0	0	0	0	0	0	0
	3	-64	-152	-256	-3.999	-4.001	0	0	0	0	0	0	0	0	0	0	0	0	0	0	0									3	-192	-456	-768	-11.997	-12.003	0	0	0	0	0	0	0	0	0	0	0	0	0	0
	4	-64	-152	-256	-3.999	-4.001	0	0	0	0	0	0	0	0	0	0	0	0	0	0	0									4	-256	-608	-1024	-15.996	-16.004	0	0	0	0	0	0	0	0	0	0	0	0	0	0
	5	-64	-152	-256	-3.999	-4.001	0	0	0	0	0	0	0	0	0	0	0	0	0	0	0									5	-320	-760	-1280	-19.995	-20.005	0	0	0	0	0	0	0	0	0	0	0	0	0	0
	6	4	4	4	4	4	0	0	0	0	0	0	0	0	0	0	0	0	0	0	0									6	24	24	24	24	24	0	0	0	0	0	0	0	0	0	0	0	0	0	0
	7	4	4	4	4	4	0	0	0	0	0	0	0	0	0	0	0	0	0	0	0									7	28	28	28	28	28	0	0	0	0	0	0	0	0	0	0	0	0	0	0
	8	4	4	4	4	4	0	0	0	0	0	0	0	0	0	0	0	0	0	0	0									8	32	32	32	32	32	0	0	0	0	0	0	0	0	0	0	0	0	0	0
	9	4	4	4	4	4	0	0	0	0	0	0	0	0	0	0	0	0	0	0	0									9	36	36	36	36	36	0	0	0	0	0	0	0	0	0	0	0	0	0	0
	10	4	4	4	4	4	0	0	0	0	0	0	0	0	0	0	0	0	0	0	0									10	40	40	40	40	40	0	0	0	0	0	0	0	0	0	0	0	0	0	0
	11	0	0	0	0	0	0	0	0	0	0	0	0	0	0	0	0	0	0	0	0									11	0	0	0	0	0	0	0	0	0	0	0	0	0	0	0	0	0	0	0
	12	-30	-30	-30	-30	-30	0	0	0	0	0	0	0	0	0	0	0	0	0	0	0									12	-360	-360	-360	-360	-360	0	0	0	0	0	0	0	0	0	0	0	0	0	0
	13	-30	-30	-30	-30	-30	0	0	0	0	0	0	0	0	0	0	0	0	0	0	0									13	-390	-390	-390	-390	-390	0	0	0	0	0	0	0	0	0	0	0	0	0	0
	14	-30	-30	-30	-30	-30	0	0	0	0	0	0	0	0	0	0	0	0	0	0	0									14	-420	-420	-420	-420	-420	0	0	0	0	0	0	0	0	0	0	0	0	0	0
	15	-30	-74	-126	0.0005	-0.0005	0	0	0	0	0	0	0	0	0	0	0	0	0	0	0									15	-450	-1110	-1890	0.0075	-0.0075	0	0	0	0	0	0	0	0	0	0	0	0	0	0
	16	-30	-74	-126	0.0005	-0.0005	0	0	0	0	0	0	0	0	0	0	0	0	0	0	0									16	-480	-1184	-2016	0.008	-0.008	0	0	0	0	0	0	0	0	0	0	0	0	0	0
	17	-30	-74	-126	0.0005	-0.0005	0	0	0	0	0	0	0	0	0	0	0	0	0	0	0									17	-510	-1258	-2142	0.0085	-0.0085	0	0	0	0	0	0	0	0	0	0	0	0	0	0
	18	-30	-74	-126	0.0005	-0.0005	0	0	0	0	0	0	0	0	0	0	0	0	0	0	0									18	-540	-1332	-2268	0.009	-0.009	0	0	0	0	0	0	0	0	0	0	0	0	0	0
	19	-30	-74	-126	0.0005	-0.0005	0	0	0	0	0	0	0	0	0	0	0	0	0	0	0									19	-570	-1406	-2394	0.0095	-0.0095	0	0	0	0	0	0	0	0	0	0	0	0	0	0
	20	-30	-74	-126	0.0005	-0.0005	0	0	0	0	0	0	0	0	0	0	0	0	0	0	0									20	-600	-1480	-2520	0.01	-0.01	0	0	0	0	0	0	0	0	0	0	0	0	0	0
	21	-30	-74	-126	0.0005	-0.0005	0	0	0	0	0	0	0	0	0	0	0	0	0	0	0									21	-630	-1554	-2646	0.0105	-0.0105	0	0	0	0	0	0	0	0	0	0	0	0	0	0
	22	0	0	0	0	0	0	0	0	0	0	0	0	0	0	0	0	0	0	0	0									22	0	0	0	0	0	0	0	0	0	0	0	0	0	0	0	0	0	0	0
	23	0	0	0	0	0	0	0	0	0	0	0	0	0	0	0	0	0	0	0	0									23	0	0	0	0	0	0	0	0	0	0	0	0	0	0	0	0	0	0	0
	24	0	0	0	0	0	0	0	0	0	0	0	0	0	0	0	0	0	0	0	0									24	0	0	0	0	0	0	0	0	0	0	0	0	0	0	0	0	0	0	0
	25	0	0	0	0	0	0	0	0	0	0	0	0	0	0	0	0	0	0	0	0									25	0	0	0	0	0	0	0	0	0	0	0	0	0	0	0	0	0	0	0
	26	0	0	0	0	0	0	0	0	0	0	0	0	0	0	0	0	0	0	0	0									26	0	0	0	0	0	0	0	0	0	0	0	0	0	0	0	0	0	0	0
	27	0	0	0	0	0	0	0	0	0	0	0	0	0	0	0	0	0	0	0	0									27	0	0	0	0	0	0	0	0	0	0	0	0	0	0	0	0	0	0	0
	28	0	0	0	0	0	0	0	0	0	0	0	0	0	0	0	0	0	0	0	0									28	0	0	0	0	0	0	0	0	0	0	0	0	0	0	0	0	0	0	0
	29	0	0	0	0	0	0	0	0	0	0	0	0	0	0	0	0	0	0	0	0									29	0	0	0	0	0	0	0	0	0	0	0	0	0	0	0	0	0	0	0
	30	0	0	0	0	0	0	0	0	0	0	0	0	0	0	0	0	0	0	0	0									30	0	0	0	0	0	0	0	0	0	0	0	0	0	0	0	0	0	0	0
	31	0	0	0	0	0	0	0	0	0	0	0	0	0	0	0	0	0	0	0	0									31	0	0	0	0	0	0	0	0	0	0	0	0	0	0	0	0	0	0	0
	32	0	0	0	0	0	0	0	0	0	0	0	0	0	0	0	0	0	0	0	0									32	0	0	0	0	0	0	0	0	0	0	0	0	0	0	0	0	0	0	0
	33	0	0	0	0	0	0	0	0	0	0	0	0	0	0	0	0	0	0	0	0									33	0	0	0	0	0	0	0	0	0	0	0	0	0	0	0	0	0	0	0
	34	0	0	0	0	0	0	0	0	0	0	0	0	0	0	0	0	0	0	0	0									34	0	0	0	0	0	0	0	0	0	0	0	0	0	0	0	0	0	0	0
	35	0	0	0	0	0	0	0	0	0	0	0	0	0	0	0	0	0	0	0	0									35	0	0	0	0	0	0	0	0	0	0	0	0	0	0	0	0	0	0	0
	36	0	0	0	0	0	0	0	0	0	0	0	0	0	0	0	0	0	0	0	0									36	0	0	0	0	0	0	0	0	0	0	0	0	0	0	0	0	0	0	0
	37	0	0	0	0	0	0	0	0	0	0	0	0	0	0	0	0	0	0	0	0									37	0	0	0	0	0	0	0	0	0	0	0	0	0	0	0	0	0	0	0
	38	0	0	0	0	0	0	0	0	0	0	0	0	0	0	0	0	0	0	0	0									38	0	0	0	0	0	0	0	0	0	0	0	0	0	0	0	0	0	0	0
	39	0	0	0	0	0	0	0	0	0	0	0	0	0	0	0	0	0	0	0	0									39	0	0	0	0	0	0	0	0	0	0	0	0	0	0	0	0	0	0	0
	40	0	0	0	0	0	0	0	0	0	0	0	0	0	0	0	0	0	0	0	0									40	0	0	0	0	0	0	0	0	0	0	0	0	0	0	0	0	0	0	0
	41	0	0	0	0	0	0	0	0	0	0	0	0	0	0	0	0	0	0	0	0									41	0	0	0	0	0	0	0	0	0	0	0	0	0	0	0	0	0	0	0
	42	0	0	0	0	0	0	0	0	0	0	0	0	0	0	0	0	0	0	0	0									42	0	0	0	0	0	0	0	0	0	0	0	0	0	0	0	0	0	0	0
	43	0	0	0	0	0	0	0	0	0	0	0	0	0	0	0	0	0	0	0	0									43	0	0	0	0	0	0	0	0	0	0	0	0	0	0	0	0	0	0	0
	44	0	0	0	0	0	0	0	0	0	0	0	0	0	0	0	0	0	0	0	0									44	0	0	0	0	0	0	0	0	0	0	0	0	0	0	0	0	0	0	0
	45	0	0	0	0	0	0	0	0	0	0	0	0	0	0	0	0	0	0	0	0									45	0	0	0	0	0	0	0	0	0	0	0	0	0	0	0	0	0	0	0
	46	0	0	0	0	0	0	0	0	0	0	0	0	0	0	0	0	0	0	0	0									46	0	0	0	0	0	0	0	0	0	0	0	0	0	0	0	0	0	0	0
	47	0	0	0	0	0	0	0	0	0	0	0	0	0	0	0	0	0	0	0	0									47	0	0	0	0	0	0	0	0	0	0	0	0	0	0	0	0	0	0	0
	48	0	0	0	0	0	0	0	0	0	0	0	0	0	0	0	0	0	0	0	0									48	0	0	0	0	0	0	0	0	0	0	0	0	0	0	0	0	0	0	0
	49	0	0	0	0	0	0	0	0	0	0	0	0	0	0	0	0	0	0	0	0									49	0	0	0	0	0	0	0	0	0	0	0	0	0	0	0	0	0	0	0
	50	0	0	0	0	0	0	0	0	0	0	0	0	0	0	0	0	0	0	0	0									50	0	0	0	0	0	0	0	0	0	0	0	0	0	0	0	0	0	0	0
	51	0	0	0	0	0	0	0	0	0	0	0	0	0	0	0	0	0	0	0	0									51	0	0	0	0	0	0	0	0	0	0	0	0	0	0	0	0	0	0	0
	52	0	0	0	0	0	0	0	0	0	0	0	0	0	0	0	0	0	0	0	0									52	0	0	0	0	0	0	0	0	0	0	0	0	0	0	0	0	0	0	0
	53	0	0	0	0	0	0	0	0	0	0	0	0	0	0	0	0	0	0	0	0									53	0	0	0	0	0	0	0	0	0	0	0	0	0	0	0	0	0	0	0
	54	0	0	0	0	0	0	0	0	0	0	0	0	0	0	0	0	0	0	0	0									54	0	0	0	0	0	0	0	0	0	0	0	0	0	0	0	0	0	0	0
	55	0	0	0	0	0	0	0	0	0	0	0	0	0	0	0	0	0	0	0	0									55	0	0	0	0	0	0	0	0	0	0	0	0	0	0	0	0	0	0	0
	56	0	0	0	0	0	0	0	0	0	0	0	0	0	0	0	0	0	0	0	0									56	0	0	0	0	0	0	0	0	0	0	0	0	0	0	0	0	0	0	0
	57	0	0	0	0	0	0	0	0	0	0	0	0	0	0	0	0	0	0	0	0									57	0	0	0	0	0	0	0	0	0	0	0	0	0	0	0	0	0	0	0
	58	0	0	0	0	0	0	0	0	0	0	0	0	0	0	0	0	0	0	0	0									58	0	0	0	0	0	0	0	0	0	0	0	0	0	0	0	0	0	0	0
	59	0	0	0	0	0	0	0	0	0	0	0	0	0	0	0	0	0	0	0	0									59	0	0	0	0	0	0	0	0	0	0	0	0	0	0	0	0	0	0	0
	60	0	0	0	0	0	0	0	0	0	0	0	0	0	0	0	0	0	0	0	0									60	0	0	0	0	0	0	0	0	0	0	0	0	0	0	0	0	0	0	0
	61	0	0	0	0	0	0	0	0	0	0	0	0	0	0	0	0	0	0	0	0									61	0	0	0	0	0	0	0	0	0	0	0	0	0	0	0	0	0	0	0
	62	0	0	0	0	0	0	0	0	0	0	0	0	0	0	0	0	0	0	0	0									62	0	0	0	0	0	0	0	0	0	0	0	0	0	0	0	0	0	0	0
	63	0	0	0	0	0	0	0	0	0	0	0	0	0	0	0	0	0	0	0	0									63	0	0	0	0	0	0	0	0	0	0	0	0	0	0	0	0	0	0	0
	64	0	0	0	0	0	0	0	0	0	0	0	0	0	0	0	0	0	0	0	0									64	0	0	0	0	0	0	0	0	0	0	0	0	0	0	0	0	0	0	0
	65	0	0	0	0	0	0	0	0	0	0	0	0	0	0	0	0	0	0	0	0									65	0	0	0	0	0	0	0	0	0	0	0	0	0	0	0	0	0	0	0
	66	0	0	0	0	0	0	0	0	0	0	0	0	0	0	0	0	0	0	0	0									66	0	0	0	0	0	0	0	0	0	0	0	0	0	0	0	0	0	0	0
	67	0	0	0	0	0	0	0	0	0	0	0	0	0	0	0	0	0	0	0	0									67	0	0	0	0	0	0	0	0	0	0	0	0	0	0	0	0	0	0	0
	68	0	0	0	0	0	0	0	0	0	0	0	0	0	0	0	0	0	0	0	0									68	0	0	0	0	0	0	0	0	0	0	0	0	0	0	0	0	0	0	0
	69	0	0	0	0	0	0	0	0	0	0	0	0	0	0	0	0	0	0	0	0									69	0	0	0	0	0	0	0	0	0	0	0	0	0	0	0	0	0	0	0
	70	0	0	0	0	0	0	0	0	0	0	0	0	0	0	0	0	0	0	0	0									70	0	0	0	0	0	0	0	0	0	0	0	0	0	0	0	0	0	0	0
	71	0	0	0	0	0	0	0	0	0	0	0	0	0	0	0	0	0	0	0	0									71	0	0	0	0	0	0	0	0	0	0	0	0	0	0	0	0	0	0	0
	72	0	0	0	0	0	0	0	0	0	0	0	0	0	0	0	0	0	0	0	0									72	0	0	0	0	0	0	0	0	0	0	0	0	0	0	0	0	0	0	0
	73	0	0	0	0	0	0	0	0	0	0	0	0	0	0	0	0	0	0	0	0									73	0	0	0	0	0	0	0	0	0	0	0	0	0	0	0	0	0	0	0
	74	0	0	0	0	0	0	0	0	0	0	0	0	0	0	0	0	0	0	0	0									74	0	0	0	0	0	0	0	0	0	0	0	0	0	0	0	0	0	0	0
	75	0	0	0	0	0	0	0	0	0	0	0	0	0	0	0	0	0	0	0	0									75	0	0	0	0	0	0	0	0	0	0	0	0	0	0	0	0	0	0	0
	76	0	0	0	0	0	0	0	0	0	0	0	0	0	0	0	0	0	0	0	0									76	0	0	0	0	0	0	0	0	0	0	0	0	0	0	0	0	0	0	0
	77	0	0	0	0	0	0	0	0	0	0	0	0	0	0	0	0	0	0	0	0									77	0	0	0	0	0	0	0	0	0	0	0	0	0	0	0	0	0	0	0
	78	0	0	0	0	0	0	0	0	0	0	0	0	0	0	0	0	0	0	0	0									78	0	0	0	0	0	0	0	0	0	0	0	0	0	0	0	0	0	0	0
	79	0	0	0	0	0	0	0	0	0	0	0	0	0	0	0	0	0	0	0	0									79	0	0	0	0	0	0	0	0	0	0	0	0	0	0	0	0	0	0	0
	80	0	0	0	0	0	0	0	0	0	0	0	0	0	0	0	0	0	0	0	0									80	0	0	0	0	0	0	0	0	0	0	0	0	0	0	0	0	0	0	0
	81	0	0	0	0	0	0	0	0	0	0	0	0	0	0	0	0	0	0	0	0									81	0	0	0	0	0	0	0	0	0	0	0	0	0	0	0	0	0	0	0
	82	0	0	0	0	0	0	0	0	0	0	0	0	0	0	0	0	0	0	0	0									82	0	0	0	0	0	0	0	0	0	0	0	0	0	0	0	0	0	0	0
	83	0	0	0	0	0	0	0	0	0	0	0	0	0	0	0	0	0	0	0	0									83	0	0	0	0	0	0	0	0	0	0	0	0	0	0	0	0	0	0	0
	84	0	0	0	0	0	0	0	0	0	0	0	0	0	0	0	0	0	0	0	0									84	0	0	0	0	0	0	0	0	0	0	0	0	0	0	0	0	0	0	0
	85	0	0	0	0	0	0	0	0	0	0	0	0	0	0	0	0	0	0	0	0									85	0	0	0	0	0	0	0	0	0	0	0	0	0	0	0	0	0	0	0
	86	0	0	0	0	0	0	0	0	0	0	0	0	0	0	0	0	0	0	0	0									86	0	0	0	0	0	0	0	0	0	0	0	0	0	0	0	0	0	0	0
	87	0	0	0	0	0	0	0	0	0	0	0	0	0	0	0	0	0	0	0	0									87	0	0	0	0	0	0	0	0	0	0	0	0	0	0	0	0	0	0	0
	88	0	0	0	0	0	0	0	0	0	0	0	0	0	0	0	0	0	0	0	0									88	0	0	0	0	0	0	0	0	0	0	0	0	0	0	0	0	0	0	0
	89	0	0	0	0	0	0	0	0	0	0	0	0	0	0	0	0	0	0	0	0									89	0	0	0	0	0	0	0	0	0	0	0	0	0	0	0	0	0	0	0
	90	0	0	0	0	0	0	0	0	0	0	0	0	0	0	0	0	0	0	0	0									90	0	0	0	0	0	0	0	0	0	0	0	0	0	0	0	0	0	0	0
	91	0	0	0	0	0	0	0	0	0	0	0	0	0	0	0	0	0	0	0	0									91	0	0	0	0	0	0	0	0	0	0	0	0	0	0	0	0	0	0	0
	92	0	0	0	0	0	0	0	0	0	0	0	0	0	0	0	0	0	0	0	0									92	0	0	0	0	0	0	0	0	0	0	0	0	0	0	0	0	0	0	0
	93	0	0	0	0	0	0	0	0	0	0	0	0	0	0	0	0	0	0	0	0									93	0	0	0	0	0	0	0	0	0	0	0	0	0	0	0	0	0	0	0
	94	0	0	0	0	0	0	0	0	0	0	0	0	0	0	0	0	0	0	0	0									94	0	0	0	0	0	0	0	0	0	0	0	0	0	0	0	0	0	0	0
	95	0	0	0	0	0	0	0	0	0	0	0	0	0	0	0	0	0	0	0	0									95	0	0	0	0	0	0	0	0	0	0	0	0	0	0	0	0	0	0	0
	96	0	0	0	0	0	0	0	0	0	0	0	0	0	0	0	0	0	0	0	0									96	0	0	0	0	0	0	0	0	0	0	0	0	0	0	0	0	0	0	0
	97	0	0	0	0	0	0	0	0	0	0	0	0	0	0	0	0	0	0	0	0									97	0	0	0	0	0	0	0	0	0	0	0	0	0	0	0	0	0	0	0
	98	0	0	0	0	0	0	0	0	0	0	0	0	0	0	0	0	0	0	0	0									98	0	0	0	0	0	0	0	0	0	0	0	0	0	0	0	0	0	0	0
	99	0	0	0	0	0	0	0	0	0	0	0	0	0	0	0	0	0	0	0	0									99	0	0	0	0	0	0	0	0	0	0	0	0	0	0	0	0	0	0	0
	100	0	0	0	0	0	0	0	0	0	0	0	0	0	0	0	0	0	0	0	0									100	0	0	0	0	0	0	0	0	0	0	0	0	0	0	0	0	0	0	0
	101	0	0	0	0	0	0	0	0	0	0	0	0	0	0	0	0	0	0	0	0									101	0	0	0	0	0	0	0	0	0	0	0	0	0	0	0	0	0	0	0
	102	0	0	0	0	0	0	0	0	0	0	0	0	0	0	0	0	0	0	0	0									102	0	0	0	0	0	0	0	0	0	0	0	0	0	0	0	0	0	0	0
	103	0	0	0	0	0	0	0	0	0	0	0	0	0	0	0	0	0	0	0	0									103	0	0	0	0	0	0	0	0	0	0	0	0	0	0	0	0	0	0	0
	104	0	0	0	0	0	0	0	0	0	0	0	0	0	0	0	0	0	0	0	0									104	0	0	0	0	0	0	0	0	0	0	0	0	0	0	0	0	0	0	0
	105	0	0	0	0	0	0	0	0	0	0	0	0	0	0	0	0	0	0	0	0									105	0	0	0	0	0	0	0	0	0	0	0	0	0	0	0	0	0	0	0
	106	0	0	0	0	0	0	0	0	0	0	0	0	0	0	0	0	0	0	0	0									106	0	0	0	0	0	0	0	0	0	0	0	0	0	0	0	0	0	0	0
	107	0	0	0	0	0	0	0	0	0	0	0	0	0	0	0	0	0	0	0	0									107	0	0	0	0	0	0	0	0	0	0	0	0	0	0	0	0	0	0	0
	108	0	0	0	0	0	0	0	0	0	0	0	0	0	0	0	0	0	0	0	0									108	0	0	0	0	0	0	0	0	0	0	0	0	0	0	0	0	0	0	0
	109	0	0	0	0	0	0	0	0	0	0	0	0	0	0	0	0	0	0	0	0									109	0	0	0	0	0	0	0	0	0	0	0	0	0	0	0	0	0	0	0
	110	0	0	0	0	0	0	0	0	0	0	0	0	0	0	0	0	0	0	0	0									110	0	0	0	0	0	0	0	0	0	0	0	0	0	0	0	0	0	0	0
	111	0	0	0	0	0	0	0	0	0	0	0	0	0	0	0	0	0	0	0	0									111	0	0	0	0	0	0	0	0	0	0	0	0	0	0	0	0	0	0	0
	112	0	0	0	0	0	0	0	0	0	0	0	0	0	0	0	0	0	0	0	0									112	0	0	0	0	0	0	0	0	0	0	0	0	0	0	0	0	0	0	0
	113	0	0	0	0	0	0	0	0	0	0	0	0	0	0	0	0	0	0	0	0									113	0	0	0	0	0	0	0	0	0	0	0	0	0	0	0	0	0	0	0
	114	0	0	0	0	0	0	0	0	0	0	0	0	0	0	0	0	0	0	0	0									114	0	0	0	0	0	0	0	0	0	0	0	0	0	0	0	0	0	0	0
	115	0	0	0	0	0	0	0	0	0	0	0	0	0	0	0	0	0	0	0	0									115	0	0	0	0	0	0	0	0	0	0	0	0	0	0	0	0	0	0	0
	116	0	0	0	0	0	0	0	0	0	0	0	0	0	0	0	0	0	0	0	0									116	0	0	0	0	0	0	0	0	0	0	0	0	0	0	0	0	0	0	0
	117	0	0	0	0	0	0	0	0	0	0	0	0	0	0	0	0	0	0	0	0									117	0	0	0	0	0	0	0	0	0	0	0	0	0	0	0	0	0	0	0
	118	0	0	0	0	0	0	0	0	0	0	0	0	0	0	0	0	0	0	0	0									118	0	0	0	0	0	0	0	0	0	0	0	0	0	0	0	0	0	0	0
	119	0	0	0	0	0	0	0	0	0	0	0	0	0	0	0	0	0	0	0	0									119	0	0	0	0	0	0	0	0	0	0	0	0	0	0	0	0	0	0	0
	120	0	0	0	0	0	0	0	0	0	0	0	0	0	0	0	0	0	0	0	0									120	0	0	0	0	0	0	0	0	0	0	0	0	0	0	0	0	0	0	0
	121	0	0	0	0	0	0	0	0	0	0	0	0	0	0	0	0	0	0	0	0									121	0	0	0	0	0	0	0	0	0	0	0	0	0	0	0	0	0	0	0
	122	0	0	0	0	0	0	0	0	0	0	0	0	0	0	0	0	0	0	0	0									122	0	0	0	0	0	0	0	0	0	0	0	0	0	0	0	0	0	0	0
	123	0	0	0	0	0	0	0	0	0	0	0	0	0	0	0	0	0	0	0	0									123	0	0	0	0	0	0	0	0	0	0	0	0	0	0	0	0	0	0	0
	124	0	0	0	0	0	0	0	0	0	0	0	0	0	0	0	0	0	0	0	0									124	0	0	0	0	0	0	0	0	0	0	0	0	0	0	0	0	0	0	0
	125	0	0	0	0	0	0	0	0	0	0	0	0	0	0	0	0	0	0	0	0									125	0	0	0	0	0	0	0	0	0	0	0	0	0	0	0	0	0	0	0
	126	0	0	0	0	0	0	0	0	0	0	0	0	0	0	0	0	0	0	0	0									126	0	0	0	0	0	0	0	0	0	0	0	0	0	0	0	0	0	0	0
	127	0	0	0	0	0	0	0	0	0	0	0	0	0	0	0	0	0	0	0	0									127	0	0	0	0	0	0	0	0	0	0	0	0	0	0	0	0	0	0	0
	128	0	0	0	0	0	0	0	0	0	0	0	0	0	0	0	0	0	0	0	0									128	0	0	0	0	0	0	0	0	0	0	0	0	0	0	0	0	0	0	0
	129	0	0	0	0	0	0	0	0	0	0	0	0	0	0	0	0	0	0	0	0									129	0	0	0	0	0	0	0	0	0	0	0	0	0	0	0	0	0	0	0
	130	0	0	0	0	0	0	0	0	0	0	0	0	0	0	0	0	0	0	0	0									130	0	0	0	0	0	0	0	0	0	0	0	0	0	0	0	0	0	0	0
	131	0	0	0	0	0	0	0	0	0	0	0	0	0	0	0	0	0	0	0	0									131	0	0	0	0	0	0	0	0	0	0	0	0	0	0	0	0	0	0	0
	132	0	0	0	0	0	0	0	0	0	0	0	0	0	0	0	0	0	0	0	0									132	0	0	0	0	0	0	0	0	0	0	0	0	0	0	0	0	0	0	0
	133	0	0	0	0	0	0	0	0	0	0	0	0	0	0	0	0	0	0	0	0									133	0	0	0	0	0	0	0	0	0	0	0	0	0	0	0	0	0	0	0
	134	0	0	0	0	0	0	0	0	0	0	0	0	0	0	0	0	0	0	0	0									134	0	0	0	0	0	0	0	0	0	0	0	0	0	0	0	0	0	0	0
	135	0	0	0	0	0	0	0	0	0	0	0	0	0	0	0	0	0	0	0	0									135	0	0	0	0	0	0	0	0	0	0	0	0	0	0	0	0	0	0	0
	136	0	0	0	0	0	0	0	0	0	0	0	0	0	0	0	0	0	0	0	0									136	0	0	0	0	0	0	0	0	0	0	0	0	0	0	0	0	0	0	0
	137	0	0	0	0	0	0	0	0	0	0	0	0	0	0	0	0	0	0	0	0									137	0	0	0	0	0	0	0	0	0	0	0	0	0	0	0	0	0	0	0
	138	0	0	0	0	0	0	0	0	0	0	0	0	0	0	0	0	0	0	0	0									138	0	0	0	0	0	0	0	0	0	0	0	0	0	0	0	0	0	0	0
	139	0	0	0	0	0	0	0	0	0	0	0	0	0	0	0	0	0	0	0	0									139	0	0	0	0	0	0	0	0	0	0	0	0	0	0	0	0	0	0	0
	140	0	0	0	0	0	0	0	0	0	0	0	0	0	0	0	0	0	0	0	0									140	0	0	0	0	0	0	0	0	0	0	0	0	0	0	0	0	0	0	0
	141	0	0	0	0	0	0	0	0	0	0	0	0	0	0	0	0	0	0	0	0									141	0	0	0	0	0	0	0	0	0	0	0	0	0	0	0	0	0	0	0
	142	0	0	0	0	0	0	0	0	0	0	0	0	0	0	0	0	0	0	0	0									142	0	0	0	0	0	0	0	0	0	0	0	0	0	0	0	0	0	0	0
	143	0	0	0	0	0	0	0	0	0	0	0	0	0	0	0	0	0	0	0	0									143	0	0	0	0	0	0	0	0	0	0	0	0	0	0	0	0	0	0	0
	144	0	0	0	0	0	0	0	0	0	0	0	0	0	0	0	0	0	0	0	0									144	0	0	0	0	0	0	0	0	0	0	0	0	0	0	0	0	0	0	0
	145	0	0	0	0	0	0	0	0	0	0	0	0	0	0	0	0	0	0	0	0									145	0	0	0	0	0	0	0	0	0	0	0	0	0	0	0	0	0	0	0
	146	0	0	0	0	0	0	0	0	0	0	0	0	0	0	0	0	0	0	0	0									146	0	0	0	0	0	0	0	0	0	0	0	0	0	0	0	0	0	0	0
	147	0	0	0	0	0	0	0	0	0	0	0	0	0	0	0	0	0	0	0	0									147	0	0	0	0	0	0	0	0	0	0	0	0	0	0	0	0	0	0	0
	148	0	0	0	0	0	0	0	0	0	0	0	0	0	0	0	0	0	0	0	0									148	0	0	0	0	0	0	0	0	0	0	0	0	0	0	0	0	0	0	0
	149	0	0	0	0	0	0	0	0	0	0	0	0	0	0	0	0	0	0	0	0									149	0	0	0	0	0	0	0	0	0	0	0	0	0	0	0	0	0	0	0
	150	0	0	0	0	0	0	0	0	0	0	0	0	0	0	0	0	0	0	0	0									150	0	0	0	0	0	0	0	0	0	0	0	0	0	0	0	0	0	0	0
	151	0	0	0	0	0	0	0	0	0	0	0	0	0	0	0	0	0	0	0	0									151	0	0	0	0	0	0	0	0	0	0	0	0	0	0	0	0	0	0	0
	152	0	0	0	0	0	0	0	0	0	0	0	0	0	0	0	0	0	0	0	0									152	0	0	0	0	0	0	0	0	0	0	0	0	0	0	0	0	0	0	0
	153	0	0	0	0	0	0	0	0	0	0	0	0	0	0	0	0	0	0	0	0									153	0	0	0	0	0	0	0	0	0	0	0	0	0	0	0	0	0	0	0
	154	0	0	0	0	0	0	0	0	0	0	0	0	0	0	0	0	0	0	0	0									154	0	0	0	0	0	0	0	0	0	0	0	0	0	0	0	0	0	0	0
	155	0	0	0	0	0	0	0	0	0	0	0	0	0	0	0	0	0	0	0	0									155	0	0	0	0	0	0	0	0	0	0	0	0	0	0	0	0	0	0	0
	156	0	0	0	0	0	0	0	0	0	0	0	0	0	0	0	0	0	0	0	0									156	0	0	0	0	0	0	0	0	0	0	0	0	0	0	0	0	0	0	0
	157	0	0	0	0	0	0	0	0	0	0	0	0	0	0	0	0	0	0	0	0									157	0	0	0	0	0	0	0	0	0	0	0	0	0	0	0	0	0	0	0
	158	0	0	0	0	0	0	0	0	0	0	0	0	0	0	0	0	0	0	0	0									158	0	0	0	0	0	0	0	0	0	0	0	0	0	0	0	0	0	0	0
	159	0	0	0	0	0	0	0	0	0	0	0	0	0	0	0	0	0	0	0	0									159	0	0	0	0	0	0	0	0	0	0	0	0	0	0	0	0	0	0	0
	160	0	0	0	0	0	0	0	0	0	0	0	0	0	0	0	0	0	0	0	0									160	0	0	0	0	0	0	0	0	0	0	0	0	0	0	0	0	0	0	0
	161	0	0	0	0	0	0	0	0	0	0	0	0	0	0	0	0	0	0	0	0									161	0	0	0	0	0	0	0	0	0	0	0	0	0	0	0	0	0	0	0
	162	0	0	0	0	0	0	0	0	0	0	0	0	0	0	0	0	0	0	0	0									162	0	0	0	0	0	0	0	0	0	0	0	0	0	0	0	0	0	0	0
	163	0	0	0	0	0	0	0	0	0	0	0	0	0	0	0	0	0	0	0	0									163	0	0	0	0	0	0	0	0	0	0	0	0	0	0	0	0	0	0	0
	164	0	0	0	0	0	0	0	0	0	0	0	0	0	0	0	0	0	0	0	0									164	0	0	0	0	0	0	0	0	0	0	0	0	0	0	0	0	0	0	0
	165	0	0	0	0	0	0	0	0	0	0	0	0	0	0	0	0	0	0	0	0									165	0	0	0	0	0	0	0	0	0	0	0	0	0	0	0	0	0	0	0
	166	0	0	0	0	0	0	0	0	0	0	0	0	0	0	0	0	0	0	0	0									166	0	0	0	0	0	0	0	0	0	0	0	0	0	0	0	0	0	0	0
	167	0	0	0	0	0	0	0	0	0	0	0	0	0	0	0	0	0	0	0	0									167	0	0	0	0	0	0	0	0	0	0	0	0	0	0	0	0	0	0	0
	168	0	0	0	0	0	0	0	0	0	0	0	0	0	0	0	0	0	0	0	0									168	0	0	0	0	0	0	0	0	0	0	0	0	0	0	0	0	0	0	0
	169	0	0	0	0	0	0	0	0	0	0	0	0	0	0	0	0	0	0	0	0									169	0	0	0	0	0	0	0	0	0	0	0	0	0	0	0	0	0	0	0
	170	0	0	0	0	0	0	0	0	0	0	0	0	0	0	0	0	0	0	0	0									170	0	0	0	0	0	0	0	0	0	0	0	0	0	0	0	0	0	0	0
	171	0	0	0	0	0	0	0	0	0	0	0	0	0	0	0	0	0	0	0	0									171	0	0	0	0	0	0	0	0	0	0	0	0	0	0	0	0	0	0	0
	172	0	0	0	0	0	0	0	0	0	0	0	0	0	0	0	0	0	0	0	0									172	0	0	0	0	0	0	0	0	0	0	0	0	0	0	0	0	0	0	0
	173	0	0	0	0	0	0	0	0	0	0	0	0	0	0	0	0	0	0	0	0									173	0	0	0	0	0	0	0	0	0	0	0	0	0	0	0	0	0	0	0
	174	0	0	0	0	0	0	0	0	0	0	0	0	0	0	0	0	0	0	0	0									174	0	0	0	0	0	0	0	0	0	0	0	0	0	0	0	0	0	0	0
	175	0	0	0	0	0	0	0	0	0	0	0	0	0	0	0	0	0	0	0	0									175	0	0	0	0	0	0	0	0	0	0	0	0	0	0	0	0	0	0	0
	176	0	0	0	0	0	0	0	0	0	0	0	0	0	0	0	0	0	0	0	0									176	0	0	0	0	0	0	0	0	0	0	0	0	0	0	0	0	0	0	0
	177	0	0	0	0	0	0	0	0	0	0	0	0	0	0	0	0	0	0	0	0									177	0	0	0	0	0	0	0	0	0	0	0	0	0	0	0	0	0	0	0
	178	0	0	0	0	0	0	0	0	0	0	0	0	0	0	0	0	0	0	0	0									178	0	0	0	0	0	0	0	0	0	0	0	0	0	0	0	0	0	0	0
	179	0	0	0	0	0	0	0	0	0	0	0	0	0	0	0	0	0	0	0	0									179	0	0	0	0	0	0	0	0	0	0	0	0	0	0	0	0	0	0	0
	180	0	0	0	0	0	0	0	0	0	0	0	0	0	0	0	0	0	0	0	0									180	0	0	0	0	0	0	0	0	0	0	0	0	0	0	0	0	0	0	0
	181	0	0	0	0	0	0	0	0	0	0	0	0	0	0	0	0	0	0	0	0									181	0	0	0	0	0	0	0	0	0	0	0	0	0	0	0	0	0	0	0
	182	0	0	0	0	0	0	0	0	0	0	0	0	0	0	0	0	0	0	0	0									182	0	0	0	0	0	0	0	0	0	0	0	0	0	0	0	0	0	0	0
	183	0	0	0	0	0	0	0	0	0	0	0	0	0	0	0	0	0	0	0	0									183	0	0	0	0	0	0	0	0	0	0	0	0	0	0	0	0	0	0	0
	184	0	0	0	0	0	0	0	0	0	0	0	0	0	0	0	0	0	0	0	0									184	0	0	0	0	0	0	0	0	0	0	0	0	0	0	0	0	0	0	0
	185	0	0	0	0	0	0	0	0	0	0	0	0	0	0	0	0	0	0	0	0									185	0	0	0	0	0	0	0	0	0	0	0	0	0	0	0	0	0	0	0
	186	0	0	0	0	0	0	0	0	0	0	0	0	0	0	0	0	0	0	0	0									186	0	0	0	0	0	0	0	0	0	0	0	0	0	0	0	0	0	0	0
	187	0	0	0	0	0	0	0	0	0	0	0	0	0	0	0	0	0	0	0	0									187	0	0	0	0	0	0	0	0	0	0	0	0	0	0	0	0	0	0	0
	188	0	0	0	0	0	0	0	0	0	0	0	0	0	0	0	0	0	0	0	0									188	0	0	0	0	0	0	0	0	0	0	0	0	0	0	0	0	0	0	0
	189	0	0	0	0	0	0	0	0	0	0	0	0	0	0	0	0	0	0	0	0									189	0	0	0	0	0	0	0	0	0	0	0	0	0	0	0	0	0	0	0
	190	0	0	0	0	0	0	0	0	0	0	0	0	0	0	0	0	0	0	0	0									190	0	0	0	0	0	0	0	0	0	0	0	0	0	0	0	0	0	0	0
	191	0	0	0	0	0	0	0	0	0	0	0	0	0	0	0	0	0	0	0	0									191	0	0	0	0	0	0	0	0	0	0	0	0	0	0	0	0	0	0	0
	192	0	0	0	0	0	0	0	0	0	0	0	0	0	0	0	0	0	0	0	0									192	0	0	0	0	0	0	0	0	0	0	0	0	0	0	0	0	0	0	0
	193	0	0	0	0	0	0	0	0	0	0	0	0	0	0	0	0	0	0	0	0									193	0	0	0	0	0	0	0	0	0	0	0	0	0	0	0	0	0	0	0
	194	0	0	0	0	0	0	0	0	0	0	0	0	0	0	0	0	0	0	0	0									194	0	0	0	0	0	0	0	0	0	0	0	0	0	0	0	0	0	0	0
	195	0	0	0	0	0	0	0	0	0	0	0	0	0	0	0	0	0	0	0	0									195	0	0	0	0	0	0	0	0	0	0	0	0	0	0	0	0	0	0	0
	196	0	0	0	0	0	0	0	0	0	0	0	0	0	0	0	0	0	0	0	0									196	0	0	0	0	0	0	0	0	0	0	0	0	0	0	0	0	0	0	0
	197	0	0	0	0	0	0	0	0	0	0	0	0	0	0	0	0	0	0	0	0									197	0	0	0	0	0	0	0	0	0	0	0	0	0	0	0	0	0	0	0
	198	0	0	0	0	0	0	0	0	0	0	0	0	0	0	0	0	0	0	0	0									198	0	0	0	0	0	0	0	0	0	0	0	0	0	0	0	0	0	0	0
	199	0	0	0	0	0	0	0	0	0	0	0	0	0	0	0	0	0	0	0	0									199	0	0	0	0	0	0	0	0	0	0	0	0	0	0	0	0	0	0	0
	200	0	0	0	0	0	0	0	0	0	0	0	0	0	0	0	0	0	0	0	0									200	0	0	0	0	0	0	0	0	0	0	0	0	0	0	0	0	0	0	0
	201	0	0	0	0	0	0	0	0	0	0	0	0	0	0	0	0	0	0	0	0									201	0	0	0	0	0	0	0	0	0	0	0	0	0	0	0	0	0	0	0
	202	0	0	0	0	0	0	0	0	0	0	0	0	0	0	0	0	0	0	0	0									202	0	0	0	0	0	0	0	0	0	0	0	0	0	0	0	0	0	0	0
	203	0	0	0	0	0	0	0	0	0	0	0	0	0	0	0	0	0	0	0	0									203	0	0	0	0	0	0	0	0	0	0	0	0	0	0	0	0	0	0	0
	204	0	0	0	0	0	0	0	0	0	0	0	0	0	0	0	0	0	0	0	0									204	0	0	0	0	0	0	0	0	0	0	0	0	0	0	0	0	0	0	0
	205	0	0	0	0	0	0	0	0	0	0	0	0	0	0	0	0	0	0	0	0									205	0	0	0	0	0	0	0	0	0	0	0	0	0	0	0	0	0	0	0
	206	0	0	0	0	0	0	0	0	0	0	0	0	0	0	0	0	0	0	0	0									206	0	0	0	0	0	0	0	0	0	0	0	0	0	0	0	0	0	0	0
	207	0	0	0	0	0	0	0	0	0	0	0	0	0	0	0	0	0	0	0	0									207	0	0	0	0	0	0	0	0	0	0	0	0	0	0	0	0	0	0	0
	208	0	0	0	0	0	0	0	0	0	0	0	0	0	0	0	0	0	0	0	0									208	0	0	0	0	0	0	0	0	0	0	0	0	0	0	0	0	0	0	0
	209	0	0	0	0	0	0	0	0	0	0	0	0	0	0	0	0	0	0	0	0									209	0	0	0	0	0	0	0	0	0	0	0	0	0	0	0	0	0	0	0
	210	0	0	0	0	0	0	0	0	0	0	0	0	0	0	0	0	0	0	0	0									210	0	0	0	0	0	0	0	0	0	0	0	0	0	0	0	0	0	0	0
	211	0	0	0	0	0	0	0	0	0	0	0	0	0	0	0	0	0	0	0	0									211	0	0	0	0	0	0	0	0	0	0	0	0	0	0	0	0	0	0	0
	212	0	0	0	0	0	0	0	0	0	0	0	0	0	0	0	0	0	0	0	0									212	0	0	0	0	0	0	0	0	0	0	0	0	0	0	0	0	0	0	0
	213	0	0	0	0	0	0	0	0	0	0	0	0	0	0	0	0	0	0	0	0									213	0	0	0	0	0	0	0	0	0	0	0	0	0	0	0	0	0	0	0
	214	0	0	0	0	0	0	0	0	0	0	0	0	0	0	0	0	0	0	0	0									214	0	0	0	0	0	0	0	0	0	0	0	0	0	0	0	0	0	0	0
	215	0	0	0	0	0	0	0	0	0	0	0	0	0	0	0	0	0	0	0	0									215	0	0	0	0	0	0	0	0	0	0	0	0	0	0	0	0	0	0	0
	216	0	0	0	0	0	0	0	0	0	0	0	0	0	0	0	0	0	0	0	0									216	0	0	0	0	0	0	0	0	0	0	0	0	0	0	0	0	0	0	0
	217	0	0	0	0	0	0	0	0	0	0	0	0	0	0	0	0	0	0	0	0									217	0	0	0	0	0	0	0	0	0	0	0	0	0	0	0	0	0	0	0
	218	0	0	0	0	0	0	0	0	0	0	0	0	0	0	0	0	0	0	0	0									218	0	0	0	0	0	0	0	0	0	0	0	0	0	0	0	0	0	0	0
	219	0	0	0	0	0	0	0	0	0	0	0	0	0	0	0	0	0	0	0	0									219	0	0	0	0	0	0	0	0	0	0	0	0	0	0	0	0	0	0	0
	220	0	0	0	0	0	0	0	0	0	0	0	0	0	0	0	0	0	0	0	0									220	0	0	0	0	0	0	0	0	0	0	0	0	0	0	0	0	0	0	0
	221	0	0	0	0	0	0	0	0	0	0	0	0	0	0	0	0	0	0	0	0									221	0	0	0	0	0	0	0	0	0	0	0	0	0	0	0	0	0	0	0
	222	0	0	0	0	0	0	0	0	0	0	0	0	0	0	0	0	0	0	0	0									222	0	0	0	0	0	0	0	0	0	0	0	0	0	0	0	0	0	0	0
	223	0	0	0	0	0	0	0	0	0	0	0	0	0	0	0	0	0	0	0	0									223	0	0	0	0	0	0	0	0	0	0	0	0	0	0	0	0	0	0	0
	224	0	0	0	0	0	0	0	0	0	0	0	0	0	0	0	0	0	0	0	0									224	0	0	0	0	0	0	0	0	0	0	0	0	0	0	0	0	0	0	0
	225	0	0	0	0	0	0	0	0	0	0	0	0	0	0	0	0	0	0	0	0									225	0	0	0	0	0	0	0	0	0	0	0	0	0	0	0	0	0	0	0
	226	0	0	0	0	0	0	0	0	0	0	0	0	0	0	0	0	0	0	0	0									226	0	0	0	0	0	0	0	0	0	0	0	0	0	0	0	0	0	0	0
	227	0	0	0	0	0	0	0	0	0	0	0	0	0	0	0	0	0	0	0	0									227	0	0	0	0	0	0	0	0	0	0	0	0	0	0	0	0	0	0	0
	228	0	0	0	0	0	0	0	0	0	0	0	0	0	0	0	0	0	0	0	0									228	0	0	0	0	0	0	0	0	0	0	0	0	0	0	0	0	0	0	0
	229	0	0	0	0	0	0	0	0	0	0	0	0	0	0	0	0	0	0	0	0									229	0	0	0	0	0	0	0	0	0	0	0	0	0	0	0	0	0	0	0
	230	0	0	0	0	0	0	0	0	0	0	0	0	0	0	0	0	0	0	0	0									230	0	0	0	0	0	0	0	0	0	0	0	0	0	0	0	0	0	0	0
	231	0	0	0	0	0	0	0	0	0	0	0	0	0	0	0	0	0	0	0	0									231	0	0	0	0	0	0	0	0	0	0	0	0	0	0	0	0	0	0	0
	232	0	0	0	0	0	0	0	0	0	0	0	0	0	0	0	0	0	0	0	0									232	0	0	0	0	0	0	0	0	0	0	0	0	0	0	0	0	0	0	0
	233	0	0	0	0	0	0	0	0	0	0	0	0	0	0	0	0	0	0	0	0									233	0	0	0	0	0	0	0	0	0	0	0	0	0	0	0	0	0	0	0
	234	0	0	0	0	0	0	0	0	0	0	0	0	0	0	0	0	0	0	0	0									234	0	0	0	0	0	0	0	0	0	0	0	0	0	0	0	0	0	0	0
	235	0	0	0	0	0	0	0	0	0	0	0	0	0	0	0	0	0	0	0	0									235	0	0	0	0	0	0	0	0	0	0	0	0	0	0	0	0	0	0	0
	236	0	0	0	0	0	0	0	0	0	0	0	0	0	0	0	0	0	0	0	0									236	0	0	0	0	0	0	0	0	0	0	0	0	0	0	0	0	0	0	0
	237	0	0	0	0	0	0	0	0	0	0	0	0	0	0	0	0	0	0	0	0									237	0	0	0	0	0	0	0	0	0	0	0	0	0	0	0	0	0	0	0
	238	0	0	0	0	0	0	0	0	0	0	0	0	0	0	0	0	0	0	0	0									238	0	0	0	0	0	0	0	0	0	0	0	0	0	0	0	0	0	0	0
	239	0	0	0	0	0	0	0	0	0	0	0	0	0	0	0	0	0	0	0	0									239	0	0	0	0	0	0	0	0	0	0	0	0	0	0	0	0	0	0	0
	240	0	0	0	0	0	0	0	0	0	0	0	0	0	0	0	0	0	0	0	0									240	0	0	0	0	0	0	0	0	0	0	0	0	0	0	0	0	0	0	0
	241	0	0	0	0	0	0	0	0	0	0	0	0	0	0	0	0	0	0	0	0									241	0	0	0	0	0	0	0	0	0	0	0	0	0	0	0	0	0	0	0
	242	0	0	0	0	0	0	0	0	0	0	0	0	0	0	0	0	0	0	0	0									242	0	0	0	0	0	0	0	0	0	0	0	0	0	0	0	0	0	0	0
	243	0	0	0	0	0	0	0	0	0	0	0	0	0	0	0	0	0	0	0	0									243	0	0	0	0	0	0	0	0	0	0	0	0	0	0	0	0	0	0	0
	244	0	0	0	0	0	0	0	0	0	0	0	0	0	0	0	0	0	0	0	0									244	0	0	0	0	0	0	0	0	0	0	0	0	0	0	0	0	0	0	0
	245	0	0	0	0	0	0	0	0	0	0	0	0	0	0	0	0	0	0	0	0									245	0	0	0	0	0	0	0	0	0	0	0	0	0	0	0	0	0	0	0
	246	0	0	0	0	0	0	0	0	0	0	0	0	0	0	0	0	0	0	0	0									246	0	0	0	0	0	0	0	0	0	0	0	0	0	0	0	0	0	0	0
	247	0	0	0	0	0	0	0	0	0	0	0	0	0	0	0	0	0	0	0	0									247	0	0	0	0	0	0	0	0	0	0	0	0	0	0	0	0	0	0	0
	248	0	0	0	0	0	0	0	0	0	0	0	0	0	0	0	0	0	0	0	0									248	0	0	0	0	0	0	0	0	0	0	0	0	0	0	0	0	0	0	0
	249	0	0	0	0	0	0	0	0	0	0	0	0	0	0	0	0	0	0	0	0									249	0	0	0	0	0	0	0	0	0	0	0	0	0	0	0	0	0	0	0
	250	0	0	0	0	0	0	0	0	0	0	0	0	0	0	0	0	0	0	0	0									250	0	0	0	0	0	0	0	0	0	0	0	0	0	0	0	0	0	0	0
	251	0	0	0	0	0	0	0	0	0	0	0	0	0	0	0	0	0	0	0	0									251	0	0	0	0	0	0	0	0	0	0	0	0	0	0	0	0	0	0	0
	252	0	0	0	0	0	0	0	0	0	0	0	0	0	0	0	0	0	0	0	0									252	0	0	0	0	0	0	0	0	0	0	0	0	0	0	0	0	0	0	0
	253	0	0	0	0	0	0	0	0	0	0	0	0	0	0	0	0	0	0	0	0									253	0	0	0	0	0	0	0	0	0	0	0	0	0	0	0	0	0	0	0
	254	0	0	0	0	0	0	0	0	0	0	0	0	0	0	0	0	0	0	0	0									254	0	0	0	0	0	0	0	0	0	0	0	0	0	0	0	0	0	0	0
	255	0	0	0	0	0	0	0	0	0	0	0	0	0	0	0	0	0	0	0	0									255	0	0	0	0	0	0	0	0	0	0	0	0	0	0	0	0	0	0	0
	256	0	0	0	0	0	0	0	0	0	0	0	0	0	0	0	0	0	0	0	0									256	0	0	0	0	0	0	0	0	0	0	0	0	0	0	0	0	0	0	0
	257	0	0	0	0	0	0	0	0	0	0	0	0	0	0	0	0	0	0	0	0									257	0	0	0	0	0	0	0	0	0	0	0	0	0	0	0	0	0	0	0
	258	0	0	0	0	0	0	0	0	0	0	0	0	0	0	0	0	0	0	0	0									258	0	0	0	0	0	0	0	0	0	0	0	0	0	0	0	0	0	0	0
	259	0	0	0	0	0	0	0	0	0	0	0	0	0	0	0	0	0	0	0	0									259	0	0	0	0	0	0	0	0	0	0	0	0	0	0	0	0	0	0	0
	260	0	0	0	0	0	0	0	0	0	0	0	0	0	0	0	0	0	0	0	0									260	0	0	0	0	0	0	0	0	0	0	0	0	0	0	0	0	0	0	0
	261	0	0	0	0	0	0	0	0	0	0	0	0	0	0	0	0	0	0	0	0									261	0	0	0	0	0	0	0	0	0	0	0	0	0	0	0	0	0	0	0
	262	0	0	0	0	0	0	0	0	0	0	0	0	0	0	0	0	0	0	0	0									262	0	0	0	0	0	0	0	0	0	0	0	0	0	0	0	0	0	0	0
	263	0	0	0	0	0	0	0	0	0	0	0	0	0	0	0	0	0	0	0	0									263	0	0	0	0	0	0	0	0	0	0	0	0	0	0	0	0	0	0	0
	264	0	0	0	0	0	0	0	0	0	0	0	0	0	0	0	0	0	0	0	0									264	0	0	0	0	0	0	0	0	0	0	0	0	0	0	0	0	0	0	0
	265	0	0	0	0	0	0	0	0	0	0	0	0	0	0	0	0	0	0	0	0									265	0	0	0	0	0	0	0	0	0	0	0	0	0	0	0	0	0	0	0
	266	0	0	0	0	0	0	0	0	0	0	0	0	0	0	0	0	0	0	0	0									266	0	0	0	0	0	0	0	0	0	0	0	0	0	0	0	0	0	0	0
	267	0	0	0	0	0	0	0	0	0	0	0	0	0	0	0	0	0	0	0	0									267	0	0	0	0	0	0	0	0	0	0	0	0	0	0	0	0	0	0	0
	268	0	0	0	0	0	0	0	0	0	0	0	0	0	0	0	0	0	0	0	0									268	0	0	0	0	0	0	0	0	0	0	0	0	0	0	0	0	0	0	0
	269	0	0	0	0	0	0	0	0	0	0	0	0	0	0	0	0	0	0	0	0									269	0	0	0	0	0	0	0	0	0	0	0	0	0	0	0	0	0	0	0
	270	0	0	0	0	0	0	0	0	0	0	0	0	0	0	0	0	0	0	0	0									270	0	0	0	0	0	0	0	0	0	0	0	0	0	0	0	0	0	0	0
	271	0	0	0	0	0	0	0	0	0	0	0	0	0	0	0	0	0	0	0	0									271	0	0	0	0	0	0	0	0	0	0	0	0	0	0	0	0	0	0	0
	272	0	0	0	0	0	0	0	0	0	0	0	0	0	0	0	0	0	0	0	0									272	0	0	0	0	0	0	0	0	0	0	0	0	0	0	0	0	0	0	0
	273	0	0	0	0	0	0	0	0	0	0	0	0	0	0	0	0	0	0	0	0									273	0	0	0	0	0	0	0	0	0	0	0	0	0	0	0	0	0	0	0
	274	0	0	0	0	0	0	0	0	0	0	0	0	0	0	0	0	0	0	0	0									274	0	0	0	0	0	0	0	0	0	0	0	0	0	0	0	0	0	0	0
	275	0	0	0	0	0	0	0	0	0	0	0	0	0	0	0	0	0	0	0	0									275	0	0	0	0	0	0	0	0	0	0	0	0	0	0	0	0	0	0	0
	276	0	0	0	0	0	0	0	0	0	0	0	0	0	0	0	0	0	0	0	0									276	0	0	0	0	0	0	0	0	0	0	0	0	0	0	0	0	0	0	0
	277	0	0	0	0	0	0	0	0	0	0	0	0	0	0	0	0	0	0	0	0									277	0	0	0	0	0	0	0	0	0	0	0	0	0	0	0	0	0	0	0
	278	0	0	0	0	0	0	0	0	0	0	0	0	0	0	0	0	0	0	0	0									278	0	0	0	0	0	0	0	0	0	0	0	0	0	0	0	0	0	0	0
	279	0	0	0	0	0	0	0	0	0	0	0	0	0	0	0	0	0	0	0	0									279	0	0	0	0	0	0	0	0	0	0	0	0	0	0	0	0	0	0	0
	280	0	0	0	0	0	0	0	0	0	0	0	0	0	0	0	0	0	0	0	0									280	0	0	0	0	0	0	0	0	0	0	0	0	0	0	0	0	0	0	0
	281	0	0	0	0	0	0	0	0	0	0	0	0	0	0	0	0	0	0	0	0									281	0	0	0	0	0	0	0	0	0	0	0	0	0	0	0	0	0	0	0
	282	0	0	0	0	0	0	0	0	0	0	0	0	0	0	0	0	0	0	0	0									282	0	0	0	0	0	0	0	0	0	0	0	0	0	0	0	0	0	0	0
	283	0	0	0	0	0	0	0	0	0	0	0	0	0	0	0	0	0	0	0	0									283	0	0	0	0	0	0	0	0	0	0	0	0	0	0	0	0	0	0	0
	284	0	0	0	0	0	0	0	0	0	0	0	0	0	0	0	0	0	0	0	0									284	0	0	0	0	0	0	0	0	0	0	0	0	0	0	0	0	0	0	0
	285	0	0	0	0	0	0	0	0	0	0	0	0	0	0	0	0	0	0	0	0									285	0	0	0	0	0	0	0	0	0	0	0	0	0	0	0	0	0	0	0
	286	0	0	0	0	0	0	0	0	0	0	0	0	0	0	0	0	0	0	0	0									286	0	0	0	0	0	0	0	0	0	0	0	0	0	0	0	0	0	0	0
	287	0	0	0	0	0	0	0	0	0	0	0	0	0	0	0	0	0	0	0	0									287	0	0	0	0	0	0	0	0	0	0	0	0	0	0	0	0	0	0	0
	288	0	0	0	0	0	0	0	0	0	0	0	0	0	0	0	0	0	0	0	0									288	0	0	0	0	0	0	0	0	0	0	0	0	0	0	0	0	0	0	0
	289	0	0	0	0	0	0	0	0	0	0	0	0	0	0	0	0	0	0	0	0									289	0	0	0	0	0	0	0	0	0	0	0	0	0	0	0	0	0	0	0
	290	0	0	0	0	0	0	0	0	0	0	0	0	0	0	0	0	0	0	0	0									290	0	0	0	0	0	0	0	0	0	0	0	0	0	0	0	0	0	0	0
	291	0	0	0	0	0	0	0	0	0	0	0	0	0	0	0	0	0	0	0	0									291	0	0	0	0	0	0	0	0	0	0	0	0	0	0	0	0	0	0	0
	292	0	0	0	0	0	0	0	0	0	0	0	0	0	0	0	0	0	0	0	0									292	0	0	0	0	0	0	0	0	0	0	0	0	0	0	0	0	0	0	0
	293	0	0	0	0	0	0	0	0	0	0	0	0	0	0	0	0	0	0	0	0									293	0	0	0	0	0	0	0	0	0	0	0	0	0	0	0	0	0	0	0
	294	0	0	0	0	0	0	0	0	0	0	0	0	0	0	0	0	0	0	0	0									294	0	0	0	0	0	0	0	0	0	0	0	0	0	0	0	0	0	0	0
	295	0	0	0	0	0	0	0	0	0	0	0	0	0	0	0	0	0	0	0	0									295	0	0	0	0	0	0	0	0	0	0	0	0	0	0	0	0	0	0	0
	296	0	0	0	0	0	0	0	0	0	0	0	0	0	0	0	0	0	0	0	0									296	0	0	0	0	0	0	0	0	0	0	0	0	0	0	0	0	0	0	0
	297	0	0	0	0	0	0	0	0	0	0	0	0	0	0	0	0	0	0	0	0									297	0	0	0	0	0	0	0	0	0	0	0	0	0	0	0	0	0	0	0
	298	0	0	0	0	0	0	0	0	0	0	0	0	0	0	0	0	0	0	0	0									298	0	0	0	0	0	0	0	0	0	0	0	0	0	0	0	0	0	0	0
	299	0	0	0	0	0	0	0	0	0	0	0	0	0	0	0	0	0	0	0	0									299	0	0	0	0	0	0	0	0	0	0	0	0	0	0	0	0	0	0	0
	300	0	0	0	0	0	0	0	0	0	0	0	0	0	0	0	0	0	0	0	0									300	0	0	0	0	0	0	0	0	0	0	0	0	0	0	0	0	0	0	0
	301	0	0	0	0	0	0	0	0	0	0	0	0	0	0	0	0	0	0	0	0									301	0	0	0	0	0	0	0	0	0	0	0	0	0	0	0	0	0	0	0
	302	0	0	0	0	0	0	0	0	0	0	0	0	0	0	0	0	0	0	0	0									302	0	0	0	0	0	0	0	0	0	0	0	0	0	0	0	0	0	0	0
	303	0	0	0	0	0	0	0	0	0	0	0	0	0	0	0	0	0	0	0	0									303	0	0	0	0	0	0	0	0	0	0	0	0	0	0	0	0	0	0	0
	304	0	0	0	0	0	0	0	0	0	0	0	0	0	0	0	0	0	0	0	0									304	0	0	0	0	0	0	0	0	0	0	0	0	0	0	0	0	0	0	0
	305	0	0	0	0	0	0	0	0	0	0	0	0	0	0	0	0	0	0	0	0									305	0	0	0	0	0	0	0	0	0	0	0	0	0	0	0	0	0	0	0
	306	0	0	0	0	0	0	0	0	0	0	0	0	0	0	0	0	0	0	0	0									306	0	0	0	0	0	0	0	0	0	0	0	0	0	0	0	0	0	0	0
	307	0	0	0	0	0	0	0	0	0	0	0	0	0	0	0	0	0	0	0	0									307	0	0	0	0	0	0	0	0	0	0	0	0	0	0	0	0	0	0	0
	308	0	0	0	0	0	0	0	0	0	0	0	0	0	0	0	0	0	0	0	0									308	0	0	0	0	0	0	0	0	0	0	0	0	0	0	0	0	0	0	0
	309	0	0	0	0	0	0	0	0	0	0	0	0	0	0	0	0	0	0	0	0									309	0	0	0	0	0	0	0	0	0	0	0	0	0	0	0	0	0	0	0
	310	0	0	0	0	0	0	0	0	0	0	0	0	0	0	0	0	0	0	0	0									310	0	0	0	0	0	0	0	0	0	0	0	0	0	0	0	0	0	0	0
	311	0	0	0	0	0	0	0	0	0	0	0	0	0	0	0	0	0	0	0	0									311	0	0	0	0	0	0	0	0	0	0	0	0	0	0	0	0	0	0	0
	312	0	0	0	0	0	0	0	0	0	0	0	0	0	0	0	0	0	0	0	0									312	0	0	0	0	0	0	0	0	0	0	0	0	0	0	0	0	0	0	0
	313	0	0	0	0	0	0	0	0	0	0	0	0	0	0	0	0	0	0	0	0									313	0	0	0	0	0	0	0	0	0	0	0	0	0	0	0	0	0	0	0
	314	0	0	0	0	0	0	0	0	0	0	0	0	0	0	0	0	0	0	0	0									314	0	0	0	0	0	0	0	0	0	0	0	0	0	0	0	0	0	0	0
	315	0	0	0	0	0	0	0	0	0	0	0	0	0	0	0	0	0	0	0	0									315	0	0	0	0	0	0	0	0	0	0	0	0	0	0	0	0	0	0	0
	316	0	0	0	0	0	0	0	0	0	0	0	0	0	0	0	0	0	0	0	0									316	0	0	0	0	0	0	0	0	0	0	0	0	0	0	0	0	0	0	0
	317	0	0	0	0	0	0	0	0	0	0	0	0	0	0	0	0	0	0	0	0									317	0	0	0	0	0	0	0	0	0	0	0	0	0	0	0	0	0	0	0
	318	0	0	0	0	0	0	0	0	0	0	0	0	0	0	0	0	0	0	0	0									318	0	0	0	0	0	0	0	0	0	0	0	0	0	0	0	0	0	0	0
	319	0	0	0	0	0	0	0	0	0	0	0	0	0	0	0	0	0	0	0	0									319	0	0	0	0	0	0	0	0	0	0	0	0	0	0	0	0	0	0	0
	320	0	0	0	0	0	0	0	0	0	0	0	0	0	0	0	0	0	0	0	0									320	0	0	0	0	0	0	0	0	0	0	0	0	0	0	0	0	0	0	0
	321	0	0	0	0	0	0	0	0	0	0	0	0	0	0	0	0	0	0	0	0									321	0	0	0	0	0	0	0	0	0	0	0	0	0	0	0	0	0	0	0
	322	0	0	0	0	0	0	0	0	0	0	0	0	0	0	0	0	0	0	0	0									322	0	0	0	0	0	0	0	0	0	0	0	0	0	0	0	0	0	0	0
	323	0	0	0	0	0	0	0	0	0	0	0	0	0	0	0	0	0	0	0	0									323	0	0	0	0	0	0	0	0	0	0	0	0	0	0	0	0	0	0	0
	324	0	0	0	0	0	0	0	0	0	0	0	0	0	0	0	0	0	0	0	0									324	0	0	0	0	0	0	0	0	0	0	0	0	0	0	0	0	0	0	0
	325	0	0	0	0	0	0	0	0	0	0	0	0	0	0	0	0	0	0	0	0									325	0	0	0	0	0	0	0	0	0	0	0	0	0	0	0	0	0	0	0
	326	0	0	0	0	0	0	0	0	0	0	0	0	0	0	0	0	0	0	0	0									326	0	0	0	0	0	0	0	0	0	0	0	0	0	0	0	0	0	0	0
	327	0	0	0	0	0	0	0	0	0	0	0	0	0	0	0	0	0	0	0	0									327	0	0	0	0	0	0	0	0	0	0	0	0	0	0	0	0	0	0	0
	328	0	0	0	0	0	0	0	0	0	0	0	0	0	0	0	0	0	0	0	0									328	0	0	0	0	0	0	0	0	0	0	0	0	0	0	0	0	0	0	0
	329	0	0	0	0	0	0	0	0	0	0	0	0	0	0	0	0	0	0	0	0									329	0	0	0	0	0	0	0	0	0	0	0	0	0	0	0	0	0	0	0
	330	0	0	0	0	0	0	0	0	0	0	0	0	0	0	0	0	0	0	0	0									330	0	0	0	0	0	0	0	0	0	0	0	0	0	0	0	0	0	0	0
	331	0	0	0	0	0	0	0	0	0	0	0	0	0	0	0	0	0	0	0	0									331	0	0	0	0	0	0	0	0	0	0	0	0	0	0	0	0	0	0	0
	332	0	0	0	0	0	0	0	0	0	0	0	0	0	0	0	0	0	0	0	0									332	0	0	0	0	0	0	0	0	0	0	0	0	0	0	0	0	0	0	0
	333	0	0	0	0	0	0	0	0	0	0	0	0	0	0	0	0	0	0	0	0									333	0	0	0	0	0	0	0	0	0	0	0	0	0	0	0	0	0	0	0
	334	0	0	0	0	0	0	0	0	0	0	0	0	0	0	0	0	0	0	0	0									334	0	0	0	0	0	0	0	0	0	0	0	0	0	0	0	0	0	0	0
	335	0	0	0	0	0	0	0	0	0	0	0	0	0	0	0	0	0	0	0	0									335	0	0	0	0	0	0	0	0	0	0	0	0	0	0	0	0	0	0	0
	336	0	0	0	0	0	0	0	0	0	0	0	0	0	0	0	0	0	0	0	0									336	0	0	0	0	0	0	0	0	0	0	0	0	0	0	0	0	0	0	0
	337	0	0	0	0	0	0	0	0	0	0	0	0	0	0	0	0	0	0	0	0									337	0	0	0	0	0	0	0	0	0	0	0	0	0	0	0	0	0	0	0
	338	0	0	0	0	0	0	0	0	0	0	0	0	0	0	0	0	0	0	0	0									338	0	0	0	0	0	0	0	0	0	0	0	0	0	0	0	0	0	0	0
	339	0	0	0	0	0	0	0	0	0	0	0	0	0	0	0	0	0	0	0	0									339	0	0	0	0	0	0	0	0	0	0	0	0	0	0	0	0	0	0	0
	340	0	0	0	0	0	0	0	0	0	0	0	0	0	0	0	0	0	0	0	0									340	0	0	0	0	0	0	0	0	0	0	0	0	0	0	0	0	0	0	0
	341	0	0	0	0	0	0	0	0	0	0	0	0	0	0	0	0	0	0	0	0									341	0	0	0	0	0	0	0	0	0	0	0	0	0	0	0	0	0	0	0
	342	0	0	0	0	0	0	0	0	0	0	0	0	0	0	0	0	0	0	0	0									342	0	0	0	0	0	0	0	0	0	0	0	0	0	0	0	0	0	0	0
	343	0	0	0	0	0	0	0	0	0	0	0	0	0	0	0	0	0	0	0	0									343	0	0	0	0	0	0	0	0	0	0	0	0	0	0	0	0	0	0	0
	344	0	0	0	0	0	0	0	0	0	0	0	0	0	0	0	0	0	0	0	0									344	0	0	0	0	0	0	0	0	0	0	0	0	0	0	0	0	0	0	0
	345	0	0	0	0	0	0	0	0	0	0	0	0	0	0	0	0	0	0	0	0									345	0	0	0	0	0	0	0	0	0	0	0	0	0	0	0	0	0	0	0
	346	0	0	0	0	0	0	0	0	0	0	0	0	0	0	0	0	0	0	0	0									346	0	0	0	0	0	0	0	0	0	0	0	0	0	0	0	0	0	0	0
	347	0	0	0	0	0	0	0	0	0	0	0	0	0	0	0	0	0	0	0	0									347	0	0	0	0	0	0	0	0	0	0	0	0	0	0	0	0	0	0	0
	348	0	0	0	0	0	0	0	0	0	0	0	0	0	0	0	0	0	0	0	0									348	0	0	0	0	0	0	0	0	0	0	0	0	0	0	0	0	0	0	0
	349	0	0	0	0	0	0	0	0	0	0	0	0	0	0	0	0	0	0	0	0									349	0	0	0	0	0	0	0	0	0	0	0	0	0	0	0	0	0	0	0
	350	0	0	0	0	0	0	0	0	0	0	0	0	0	0	0	0	0	0	0	0									350	0	0	0	0	0	0	0	0	0	0	0	0	0	0	0	0	0	0	0
	351	0	0	0	0	0	0	0	0	0	0	0	0	0	0	0	0	0	0	0	0									351	0	0	0	0	0	0	0	0	0	0	0	0	0	0	0	0	0	0	0
	352	0	0	0	0	0	0	0	0	0	0	0	0	0	0	0	0	0	0	0	0									352	0	0	0	0	0	0	0	0	0	0	0	0	0	0	0	0	0	0	0
	353	0	0	0	0	0	0	0	0	0	0	0	0	0	0	0	0	0	0	0	0									353	0	0	0	0	0	0	0	0	0	0	0	0	0	0	0	0	0	0	0
	354	0	0	0	0	0	0	0	0	0	0	0	0	0	0	0	0	0	0	0	0									354	0	0	0	0	0	0	0	0	0	0	0	0	0	0	0	0	0	0	0
	355	0	0	0	0	0	0	0	0	0	0	0	0	0	0	0	0	0	0	0	0									355	0	0	0	0	0	0	0	0	0	0	0	0	0	0	0	0	0	0	0
	356	0	0	0	0	0	0	0	0	0	0	0	0	0	0	0	0	0	0	0	0									356	0	0	0	0	0	0	0	0	0	0	0	0	0	0	0	0	0	0	0
	357	0	0	0	0	0	0	0	0	0	0	0	0	0	0	0	0	0	0	0	0									357	0	0	0	0	0	0	0	0	0	0	0	0	0	0	0	0	0	0	0
	358	0	0	0	0	0	0	0	0	0	0	0	0	0	0	0	0	0	0	0	0									358	0	0	0	0	0	0	0	0	0	0	0	0	0	0	0	0	0	0	0
	359	0	0	0	0	0	0	0	0	0	0	0	0	0	0	0	0	0	0	0	0									359	0	0	0	0	0	0	0	0	0	0	0	0	0	0	0	0	0	0	0
	360	0	0	0	0	0	0	0	0	0	0	0	0	0	0	0	0	0	0	0	0									360	0	0	0	0	0	0	0	0	0	0	0	0	0	0	0	0	0	0	0
	361	0	0	0	0	0	0	0	0	0	0	0	0	0	0	0	0	0	0	0	0									361	0	0	0	0	0	0	0	0	0	0	0	0	0	0	0	0	0	0	0
	362	0	0	0	0	0	0	0	0	0	0	0	0	0	0	0	0	0	0	0	0									362	0	0	0	0	0	0	0	0	0	0	0	0	0	0	0	0	0	0	0
	363	0	0	0	0	0	0	0	0	0	0	0	0	0	0	0	0	0	0	0	0									363	0	0	0	0	0	0	0	0	0	0	0	0	0	0	0	0	0	0	0
	364	0	0	0	0	0	0	0	0	0	0	0	0	0	0	0	0	0	0	0	0									364	0	0	0	0	0	0	0	0	0	0	0	0	0	0	0	0	0	0	0
	365	0	0	0	0	0	0	0	0	0	0	0	0	0	0	0	0	0	0	0	0									365	0	0	0	0	0	0	0	0	0	0	0	0	0	0	0	0	0	0	0
	366	0	0	0	0	0	0	0	0	0	0	0	0	0	0	0	0	0	0	0	0									366	0	0	0	0	0	0	0	0	0	0	0	0	0	0	0	0	0	0	0
	367	0	0	0	0	0	0	0	0	0	0	0	0	0	0	0	0	0	0	0	0									367	0	0	0	0	0	0	0	0	0	0	0	0	0	0	0	0	0	0	0
	368	0	0	0	0	0	0	0	0	0	0	0	0	0	0	0	0	0	0	0	0									368	0	0	0	0	0	0	0	0	0	0	0	0	0	0	0	0	0	0	0
	369	0	0	0	0	0	0	0	0	0	0	0	0	0	0	0	0	0	0	0	0									369	0	0	0	0	0	0	0	0	0	0	0	0	0	0	0	0	0	0	0
	370	0	0	0	0	0	0	0	0	0	0	0	0	0	0	0	0	0	0	0	0									370	0	0	0	0	0	0	0	0	0	0	0	0	0	0	0	0	0	0	0
	371	0	0	0	0	0	0	0	0	0	0	0	0	0	0	0	0	0	0	0	0									371	0	0	0	0	0	0	0	0	0	0	0	0	0	0	0	0	0	0	0
	372	0	0	0	0	0	0	0	0	0	0	0	0	0	0	0	0	0	0	0	0									372	0	0	0	0	0	0	0	0	0	0	0	0	0	0	0	0	0	0	0
	373	0	0	0	0	0	0	0	0	0	0	0	0	0	0	0	0	0	0	0	0									373	0	0	0	0	0	0	0	0	0	0	0	0	0	0	0	0	0	0	0
	374	0	0	0	0	0	0	0	0	0	0	0	0	0	0	0	0	0	0	0	0									374	0	0	0	0	0	0	0	0	0	0	0	0	0	0	0	0	0	0	0
	375	0	0	0	0	0	0	0	0	0	0	0	0	0	0	0	0	0	0	0	0									375	0	0	0	0	0	0	0	0	0	0	0	0	0	0	0	0	0	0	0
	376	0	0	0	0	0	0	0	0	0	0	0	0	0	0	0	0	0	0	0	0									376	0	0	0	0	0	0	0	0	0	0	0	0	0	0	0	0	0	0	0
	377	0	0	0	0	0	0	0	0	0	0	0	0	0	0	0	0	0	0	0	0									377	0	0	0	0	0	0	0	0	0	0	0	0	0	0	0	0	0	0	0
	378	0	0	0	0	0	0	0	0	0	0	0	0	0	0	0	0	0	0	0	0									378	0	0	0	0	0	0	0	0	0	0	0	0	0	0	0	0	0	0	0
	379	0	0	0	0	0	0	0	0	0	0	0	0	0	0	0	0	0	0	0	0									379	0	0	0	0	0	0	0	0	0	0	0	0	0	0	0	0	0	0	0
	380	0	0	0	0	0	0	0	0	0	0	0	0	0	0	0	0	0	0	0	0									380	0	0	0	0	0	0	0	0	0	0	0	0	0	0	0	0	0	0	0
	381	0	0	0	0	0	0	0	0	0	0	0	0	0	0	0	0	0	0	0	0									381	0	0	0	0	0	0	0	0	0	0	0	0	0	0	0	0	0	0	0
	382	0	0	0	0	0	0	0	0	0	0	0	0	0	0	0	0	0	0	0	0									382	0	0	0	0	0	0	0	0	0	0	0	0	0	0	0	0	0	0	0
	383	0	0	0	0	0	0	0	0	0	0	0	0	0	0	0	0	0	0	0	0									383	0	0	0	0	0	0	0	0	0	0	0	0	0	0	0	0	0	0	0
	384	0	0	0	0	0	0	0	0	0	0	0	0	0	0	0	0	0	0	0	0									384	0	0	0	0	0	0	0	0	0	0	0	0	0	0	0	0	0	0	0
	385	0	0	0	0	0	0	0	0	0	0	0	0	0	0	0	0	0	0	0	0									385	0	0	0	0	0	0	0	0	0	0	0	0	0	0	0	0	0	0	0
	386	0	0	0	0	0	0	0	0	0	0	0	0	0	0	0	0	0	0	0	0									386	0	0	0	0	0	0	0	0	0	0	0	0	0	0	0	0	0	0	0
	387	0	0	0	0	0	0	0	0	0	0	0	0	0	0	0	0	0	0	0	0									387	0	0	0	0	0	0	0	0	0	0	0	0	0	0	0	0	0	0	0
	388	0	0	0	0	0	0	0	0	0	0	0	0	0	0	0	0	0	0	0	0									388	0	0	0	0	0	0	0	0	0	0	0	0	0	0	0	0	0	0	0
	389	0	0	0	0	0	0	0	0	0	0	0	0	0	0	0	0	0	0	0	0									389	0	0	0	0	0	0	0	0	0	0	0	0	0	0	0	0	0	0	0
	390	0	0	0	0	0	0	0	0	0	0	0	0	0	0	0	0	0	0	0	0									390	0	0	0	0	0	0	0	0	0	0	0	0	0	0	0	0	0	0	0
	391	0	0	0	0	0	0	0	0	0	0	0	0	0	0	0	0	0	0	0	0									391	0	0	0	0	0	0	0	0	0	0	0	0	0	0	0	0	0	0	0
	392	0	0	0	0	0	0	0	0	0	0	0	0	0	0	0	0	0	0	0	0									392	0	0	0	0	0	0	0	0	0	0	0	0	0	0	0	0	0	0	0
	393	0	0	0	0	0	0	0	0	0	0	0	0	0	0	0	0	0	0	0	0									393	0	0	0	0	0	0	0	0	0	0	0	0	0	0	0	0	0	0	0
	394	0	0	0	0	0	0	0	0	0	0	0	0	0	0	0	0	0	0	0	0									394	0	0	0	0	0	0	0	0	0	0	0	0	0	0	0	0	0	0	0
	395	0	0	0	0	0	0	0	0	0	0	0	0	0	0	0	0	0	0	0	0									395	0	0	0	0	0	0	0	0	0	0	0	0	0	0	0	0	0	0	0
	396	0	0	0	0	0	0	0	0	0	0	0	0	0	0	0	0	0	0	0	0									396	0	0	0	0	0	0	0	0	0	0	0	0	0	0	0	0	0	0	0
	397	0	0	0	0	0	0	0	0	0	0	0	0	0	0	0	0	0	0	0	0									397	0	0	0	0	0	0	0	0	0	0	0	0	0	0	0	0	0	0	0
	398	0	0	0	0	0	0	0	0	0	0	0	0	0	0	0	0	0	0	0	0									398	0	0	0	0	0	0	0	0	0	0	0	0	0	0	0	0	0	0	0
	399	0	0	0	0	0	0	0	0	0	0	0	0	0	0	0	0	0	0	0	0									399	0	0	0	0	0	0	0	0	0	0	0	0	0	0	0	0	0	0	0
	400	0	0	0	0	0	0	0	0	0	0	0	0	0	0	0	0	0	0	0	0									400	0	0	0	0	0	0	0	0	0	0	0	0	0	0	0	0	0	0	0
	401	0	0	0	0	0	0	0	0	0	0	0	0	0	0	0	0	0	0	0	0									401	0	0	0	0	0	0	0	0	0	0	0	0	0	0	0	0	0	0	0
	402	0	0	0	0	0	0	0	0	0	0	0	0	0	0	0	0	0	0	0	0									402	0	0	0	0	0	0	0	0	0	0	0	0	0	0	0	0	0	0	0
	403	0	0	0	0	0	0	0	0	0	0	0	0	0	0	0	0	0	0	0	0									403	0	0	0	0	0	0	0	0	0	0	0	0	0	0	0	0	0	0	0
	404	0	0	0	0	0	0	0	0	0	0	0	0	0	0	0	0	0	0	0	0									404	0	0	0	0	0	0	0	0	0	0	0	0	0	0	0	0	0	0	0
	405	0	0	0	0	0	0	0	0	0	0	0	0	0	0	0	0	0	0	0	0									405	0	0	0	0	0	0	0	0	0	0	0	0	0	0	0	0	0	0	0
	406	0	0	0	0	0	0	0	0	0	0	0	0	0	0	0	0	0	0	0	0									406	0	0	0	0	0	0	0	0	0	0	0	0	0	0	0	0	0	0	0
	407	0	0	0	0	0	0	0	0	0	0	0	0	0	0	0	0	0	0	0	0									407	0	0	0	0	0	0	0	0	0	0	0	0	0	0	0	0	0	0	0
	408	0	0	0	0	0	0	0	0	0	0	0	0	0	0	0	0	0	0	0	0									408	0	0	0	0	0	0	0	0	0	0	0	0	0	0	0	0	0	0	0
	409	0	0	0	0	0	0	0	0	0	0	0	0	0	0	0	0	0	0	0	0									409	0	0	0	0	0	0	0	0	0	0	0	0	0	0	0	0	0	0	0
	410	0	0	0	0	0	0	0	0	0	0	0	0	0	0	0	0	0	0	0	0									410	0	0	0	0	0	0	0	0	0	0	0	0	0	0	0	0	0	0	0
	411	0	0	0	0	0	0	0	0	0	0	0	0	0	0	0	0	0	0	0	0									411	0	0	0	0	0	0	0	0	0	0	0	0	0	0	0	0	0	0	0
	412	0	0	0	0	0	0	0	0	0	0	0	0	0	0	0	0	0	0	0	0									412	0	0	0	0	0	0	0	0	0	0	0	0	0	0	0	0	0	0	0
	413	0	0	0	0	0	0	0	0	0	0	0	0	0	0	0	0	0	0	0	0									413	0	0	0	0	0	0	0	0	0	0	0	0	0	0	0	0	0	0	0
	414	0	0	0	0	0	0	0	0	0	0	0	0	0	0	0	0	0	0	0	0									414	0	0	0	0	0	0	0	0	0	0	0	0	0	0	0	0	0	0	0
	415	0	0	0	0	0	0	0	0	0	0	0	0	0	0	0	0	0	0	0	0									415	0	0	0	0	0	0	0	0	0	0	0	0	0	0	0	0	0	0	0
	416	0	0	0	0	0	0	0	0	0	0	0	0	0	0	0	0	0	0	0	0									416	0	0	0	0	0	0	0	0	0	0	0	0	0	0	0	0	0	0	0
	417	0	0	0	0	0	0	0	0	0	0	0	0	0	0	0	0	0	0	0	0									417	0	0	0	0	0	0	0	0	0	0	0	0	0	0	0	0	0	0	0
	418	0	0	0	0	0	0	0	0	0	0	0	0	0	0	0	0	0	0	0	0									418	0	0	0	0	0	0	0	0	0	0	0	0	0	0	0	0	0	0	0
	419	0	0	0	0	0	0	0	0	0	0	0	0	0	0	0	0	0	0	0	0									419	0	0	0	0	0	0	0	0	0	0	0	0	0	0	0	0	0	0	0
	420	0	0	0	0	0	0	0	0	0	0	0	0	0	0	0	0	0	0	0	0									420	0	0	0	0	0	0	0	0	0	0	0	0	0	0	0	0	0	0	0
	421	0	0	0	0	0	0	0	0	0	0	0	0	0	0	0	0	0	0	0	0									421	0	0	0	0	0	0	0	0	0	0	0	0	0	0	0	0	0	0	0
	422	0	0	0	0	0	0	0	0	0	0	0	0	0	0	0	0	0	0	0	0									422	0	0	0	0	0	0	0	0	0	0	0	0	0	0	0	0	0	0	0
	423	0	0	0	0	0	0	0	0	0	0	0	0	0	0	0	0	0	0	0	0									423	0	0	0	0	0	0	0	0	0	0	0	0	0	0	0	0	0	0	0
	424	0	0	0	0	0	0	0	0	0	0	0	0	0	0	0	0	0	0	0	0									424	0	0	0	0	0	0	0	0	0	0	0	0	0	0	0	0	0	0	0
	425	0	0	0	0	0	0	0	0	0	0	0	0	0	0	0	0	0	0	0	0									425	0	0	0	0	0	0	0	0	0	0	0	0	0	0	0	0	0	0	0
	426	0	0	0	0	0	0	0	0	0	0	0	0	0	0	0	0	0	0	0	0									426	0	0	0	0	0	0	0	0	0	0	0	0	0	0	0	0	0	0	0
	427	0	0	0	0	0	0	0	0	0	0	0	0	0	0	0	0	0	0	0	0									427	0	0	0	0	0	0	0	0	0	0	0	0	0	0	0	0	0	0	0
	428	0	0	0	0	0	0	0	0	0	0	0	0	0	0	0	0	0	0	0	0									428	0	0	0	0	0	0	0	0	0	0	0	0	0	0	0	0	0	0	0
	429	0	0	0	0	0	0	0	0	0	0	0	0	0	0	0	0	0	0	0	0									429	0	0	0	0	0	0	0	0	0	0	0	0	0	0	0	0	0	0	0
	430	0	0	0	0	0	0	0	0	0	0	0	0	0	0	0	0	0	0	0	0									430	0	0	0	0	0	0	0	0	0	0	0	0	0	0	0	0	0	0	0
	431	0	0	0	0	0	0	0	0	0	0	0	0	0	0	0	0	0	0	0	0									431	0	0	0	0	0	0	0	0	0	0	0	0	0	0	0	0	0	0	0
	432	0	0	0	0	0	0	0	0	0	0	0	0	0	0	0	0	0	0	0	0									432	0	0	0	0	0	0	0	0	0	0	0	0	0	0	0	0	0	0	0
	433	0	0	0	0	0	0	0	0	0	0	0	0	0	0	0	0	0	0	0	0									433	0	0	0	0	0	0	0	0	0	0	0	0	0	0	0	0	0	0	0
	434	0	0	0	0	0	0	0	0	0	0	0	0	0	0	0	0	0	0	0	0									434	0	0	0	0	0	0	0	0	0	0	0	0	0	0	0	0	0	0	0
	435	0	0	0	0	0	0	0	0	0	0	0	0	0	0	0	0	0	0	0	0									435	0	0	0	0	0	0	0	0	0	0	0	0	0	0	0	0	0	0	0
	436	0	0	0	0	0	0	0	0	0	0	0	0	0	0	0	0	0	0	0	0									436	0	0	0	0	0	0	0	0	0	0	0	0	0	0	0	0	0	0	0
	437	0	0	0	0	0	0	0	0	0	0	0	0	0	0	0	0	0	0	0	0									437	0	0	0	0	0	0	0	0	0	0	0	0	0	0	0	0	0	0	0
	438	0	0	0	0	0	0	0	0	0	0	0	0	0	0	0	0	0	0	0	0									438	0	0	0	0	0	0	0	0	0	0	0	0	0	0	0	0	0	0	0
	439	0	0	0	0	0	0	0	0	0	0	0	0	0	0	0	0	0	0	0	0									439	0	0	0	0	0	0	0	0	0	0	0	0	0	0	0	0	0	0	0
	440	0	0	0	0	0	0	0	0	0	0	0	0	0	0	0	0	0	0	0	0									440	0	0	0	0	0	0	0	0	0	0	0	0	0	0	0	0	0	0	0
	441	0	0	0	0	0	0	0	0	0	0	0	0	0	0	0	0	0	0	0	0									441	0	0	0	0	0	0	0	0	0	0	0	0	0	0	0	0	0	0	0
	442	0	0	0	0	0	0	0	0	0	0	0	0	0	0	0	0	0	0	0	0									442	0	0	0	0	0	0	0	0	0	0	0	0	0	0	0	0	0	0	0
	443	0	0	0	0	0	0	0	0	0	0	0	0	0	0	0	0	0	0	0	0									443	0	0	0	0	0	0	0	0	0	0	0	0	0	0	0	0	0	0	0
	444	0	0	0	0	0	0	0	0	0	0	0	0	0	0	0	0	0	0	0	0									444	0	0	0	0	0	0	0	0	0	0	0	0	0	0	0	0	0	0	0
	445	0	0	0	0	0	0	0	0	0	0	0	0	0	0	0	0	0	0	0	0									445	0	0	0	0	0	0	0	0	0	0	0	0	0	0	0	0	0	0	0
	446	0	0	0	0	0	0	0	0	0	0	0	0	0	0	0	0	0	0	0	0									446	0	0	0	0	0	0	0	0	0	0	0	0	0	0	0	0	0	0	0
	447	0	0	0	0	0	0	0	0	0	0	0	0	0	0	0	0	0	0	0	0									447	0	0	0	0	0	0	0	0	0	0	0	0	0	0	0	0	0	0	0
	448	0	0	0	0	0	0	0	0	0	0	0	0	0	0	0	0	0	0	0	0									448	0	0	0	0	0	0	0	0	0	0	0	0	0	0	0	0	0	0	0
	449	0	0	0	0	0	0	0	0	0	0	0	0	0	0	0	0	0	0	0	0									449	0	0	0	0	0	0	0	0	0	0	0	0	0	0	0	0	0	0	0
	450	0	0	0	0	0	0	0	0	0	0	0	0	0	0	0	0	0	0	0	0									450	0	0	0	0	0	0	0	0	0	0	0	0	0	0	0	0	0	0	0
	451	0	0	0	0	0	0	0	0	0	0	0	0	0	0	0	0	0	0	0	0									451	0	0	0	0	0	0	0	0	0	0	0	0	0	0	0	0	0	0	0
	452	0	0	0	0	0	0	0	0	0	0	0	0	0	0	0	0	0	0	0	0									452	0	0	0	0	0	0	0	0	0	0	0	0	0	0	0	0	0	0	0
	453	0	0	0	0	0	0	0	0	0	0	0	0	0	0	0	0	0	0	0	0									453	0	0	0	0	0	0	0	0	0	0	0	0	0	0	0	0	0	0	0
	454	0	0	0	0	0	0	0	0	0	0	0	0	0	0	0	0	0	0	0	0									454	0	0	0	0	0	0	0	0	0	0	0	0	0	0	0	0	0	0	0
	455	0	0	0	0	0	0	0	0	0	0	0	0	0	0	0	0	0	0	0	0									455	0	0	0	0	0	0	0	0	0	0	0	0	0	0	0	0	0	0	0
	456	0	0	0	0	0	0	0	0	0	0	0	0	0	0	0	0	0	0	0	0									456	0	0	0	0	0	0	0	0	0	0	0	0	0	0	0	0	0	0	0
	457	0	0	0	0	0	0	0	0	0	0	0	0	0	0	0	0	0	0	0	0									457	0	0	0	0	0	0	0	0	0	0	0	0	0	0	0	0	0	0	0
	458	0	0	0	0	0	0	0	0	0	0	0	0	0	0	0	0	0	0	0	0									458	0	0	0	0	0	0	0	0	0	0	0	0	0	0	0	0	0	0	0
	459	0	0	0	0	0	0	0	0	0	0	0	0	0	0	0	0	0	0	0	0									459	0	0	0	0	0	0	0	0	0	0	0	0	0	0	0	0	0	0	0
	460	0	0	0	0	0	0	0	0	0	0	0	0	0	0	0	0	0	0	0	0									460	0	0	0	0	0	0	0	0	0	0	0	0	0	0	0	0	0	0	0
	461	0	0	0	0	0	0	0	0	0	0	0	0	0	0	0	0	0	0	0	0									461	0	0	0	0	0	0	0	0	0	0	0	0	0	0	0	0	0	0	0
	462	0	0	0	0	0	0	0	0	0	0	0	0	0	0	0	0	0	0	0	0									462	0	0	0	0	0	0	0	0	0	0	0	0	0	0	0	0	0	0	0
	463	0	0	0	0	0	0	0	0	0	0	0	0	0	0	0	0	0	0	0	0									463	0	0	0	0	0	0	0	0	0	0	0	0	0	0	0	0	0	0	0
	464	0	0	0	0	0	0	0	0	0	0	0	0	0	0	0	0	0	0	0	0									464	0	0	0	0	0	0	0	0	0	0	0	0	0	0	0	0	0	0	0
	465	0	0	0	0	0	0	0	0	0	0	0	0	0	0	0	0	0	0	0	0									465	0	0	0	0	0	0	0	0	0	0	0	0	0	0	0	0	0	0	0
	466	0	0	0	0	0	0	0	0	0	0	0	0	0	0	0	0	0	0	0	0									466	0	0	0	0	0	0	0	0	0	0	0	0	0	0	0	0	0	0	0
	467	0	0	0	0	0	0	0	0	0	0	0	0	0	0	0	0	0	0	0	0									467	0	0	0	0	0	0	0	0	0	0	0	0	0	0	0	0	0	0	0
	468	0	0	0	0	0	0	0	0	0	0	0	0	0	0	0	0	0	0	0	0									468	0	0	0	0	0	0	0	0	0	0	0	0	0	0	0	0	0	0	0
	469	0	0	0	0	0	0	0	0	0	0	0	0	0	0	0	0	0	0	0	0									469	0	0	0	0	0	0	0	0	0	0	0	0	0	0	0	0	0	0	0
	470	0	0	0	0	0	0	0	0	0	0	0	0	0	0	0	0	0	0	0	0									470	0	0	0	0	0	0	0	0	0	0	0	0	0	0	0	0	0	0	0
	471	0	0	0	0	0	0	0	0	0	0	0	0	0	0	0	0	0	0	0	0									471	0	0	0	0	0	0	0	0	0	0	0	0	0	0	0	0	0	0	0
	472	0	0	0	0	0	0	0	0	0	0	0	0	0	0	0	0	0	0	0	0									472	0	0	0	0	0	0	0	0	0	0	0	0	0	0	0	0	0	0	0
	473	0	0	0	0	0	0	0	0	0	0	0	0	0	0	0	0	0	0	0	0									473	0	0	0	0	0	0	0	0	0	0	0	0	0	0	0	0	0	0	0
	474	0	0	0	0	0	0	0	0	0	0	0	0	0	0	0	0	0	0	0	0									474	0	0	0	0	0	0	0	0	0	0	0	0	0	0	0	0	0	0	0
	475	0	0	0	0	0	0	0	0	0	0	0	0	0	0	0	0	0	0	0	0									475	0	0	0	0	0	0	0	0	0	0	0	0	0	0	0	0	0	0	0
	476	0	0	0	0	0	0	0	0	0	0	0	0	0	0	0	0	0	0	0	0									476	0	0	0	0	0	0	0	0	0	0	0	0	0	0	0	0	0	0	0
	477	0	0	0	0	0	0	0	0	0	0	0	0	0	0	0	0	0	0	0	0									477	0	0	0	0	0	0	0	0	0	0	0	0	0	0	0	0	0	0	0
	478	0	0	0	0	0	0	0	0	0	0	0	0	0	0	0	0	0	0	0	0									478	0	0	0	0	0	0	0	0	0	0	0	0	0	0	0	0	0	0	0
	479	0	0	0	0	0	0	0	0	0	0	0	0	0	0	0	0	0	0	0	0									479	0	0	0	0	0	0	0	0	0	0	0	0	0	0	0	0	0	0	0
	480	0	0	0	0	0	0	0	0	0	0	0	0	0	0	0	0	0	0	0	0									480	0	0	0	0	0	0	0	0	0	0	0	0	0	0	0	0	0	0	0
	481	0	0	0	0	0	0	0	0	0	0	0	0	0	0	0	0	0	0	0	0									481	0	0	0	0	0	0	0	0	0	0	0	0	0	0	0	0	0	0	0
	482	0	0	0	0	0	0	0	0	0	0	0	0	0	0	0	0	0	0	0	0									482	0	0	0	0	0	0	0	0	0	0	0	0	0	0	0	0	0	0	0
	483	0	0	0	0	0	0	0	0	0	0	0	0	0	0	0	0	0	0	0	0									483	0	0	0	0	0	0	0	0	0	0	0	0	0	0	0	0	0	0	0
	484	0	0	0	0	0	0	0	0	0	0	0	0	0	0	0	0	0	0	0	0									484	0	0	0	0	0	0	0	0	0	0	0	0	0	0	0	0	0	0	0
	485	0	0	0	0	0	0	0	0	0	0	0	0	0	0	0	0	0	0	0	0									485	0	0	0	0	0	0	0	0	0	0	0	0	0	0	0	0	0	0	0
	486	0	0	0	0	0	0	0	0	0	0	0	0	0	0	0	0	0	0	0	0									486	0	0	0	0	0	0	0	0	0	0	0	0	0	0	0	0	0	0	0
	487	0	0	0	0	0	0	0	0	0	0	0	0	0	0	0	0	0	0	0	0									487	0	0	0	0	0	0	0	0	0	0	0	0	0	0	0	0	0	0	0
	488	0	0	0	0	0	0	0	0	0	0	0	0	0	0	0	0	0	0	0	0									488	0	0	0	0	0	0	0	0	0	0	0	0	0	0	0	0	0	0	0
	489	0	0	0	0	0	0	0	0	0	0	0	0	0	0	0	0	0	0	0	0									489	0	0	0	0	0	0	0	0	0	0	0	0	0	0	0	0	0	0	0
	490	0	0	0	0	0	0	0	0	0	0	0	0	0	0	0	0	0	0	0	0									490	0	0	0	0	0	0	0	0	0	0	0	0	0	0	0	0	0	0	0
	491	0	0	0	0	0	0	0	0	0	0	0	0	0	0	0	0	0	0	0	0									491	0	0	0	0	0	0	0	0	0	0	0	0	0	0	0	0	0	0	0
	492	0	0	0	0	0	0	0	0	0	0	0	0	0	0	0	0	0	0	0	0									492	0	0	0	0	0	0	0	0	0	0	0	0	0	0	0	0	0	0	0
	493	0	0	0	0	0	0	0	0	0	0	0	0	0	0	0	0	0	0	0	0									493	0	0	0	0	0	0	0	0	0	0	0	0	0	0	0	0	0	0	0
	494	0	0	0	0	0	0	0	0	0	0	0	0	0	0	0	0	0	0	0	0									494	0	0	0	0	0	0	0	0	0	0	0	0	0	0	0	0	0	0	0
	495	0	0	0	0	0	0	0	0	0	0	0	0	0	0	0	0	0	0	0	0									495	0	0	0	0	0	0	0	0	0	0	0	0	0	0	0	0	0	0	0
	496	0	0	0	0	0	0	0	0	0	0	0	0	0	0	0	0	0	0	0	0									496	0	0	0	0	0	0	0	0	0	0	0	0	0	0	0	0	0	0	0
	497	0	0	0	0	0	0	0	0	0	0	0	0	0	0	0	0	0	0	0	0									497	0	0	0	0	0	0	0	0	0	0	0	0	0	0	0	0	0	0	0
	498	0	0	0	0	0	0	0	0	0	0	0	0	0	0	0	0	0	0	0	0									498	0	0	0	0	0	0	0	0	0	0	0	0	0	0	0	0	0	0	0
	499	0	0	0	0	0	0	0	0	0	0	0	0	0	0	0	0	0	0	0	0									499	0	0	0	0	0	0	0	0	0	0	0	0	0	0	0	0	0	0	0
	500	0	0	0	0	0	0	0	0	0	0	0	0	0	0	0	0	0	0	0	0									500	0	0	0	0	0	0	0	0	0	0	0	0	0	0	0	0	0	0	0
	501	0	0	0	0	0	0	0	0	0	0	0	0	0	0	0	0	0	0	0	0									501	0	0	0	0	0	0	0	0	0	0	0	0	0	0	0	0	0	0	0
	502	0	0	0	0	0	0	0	0	0	0	0	0	0	0	0	0	0	0	0	0									502	0	0	0	0	0	0	0	0	0	0	0	0	0	0	0	0	0	0	0
	503	0	0	0	0	0	0	0	0	0	0	0	0	0	0	0	0	0	0	0	0									503	0	0	0	0	0	0	0	0	0	0	0	0	0	0	0	0	0	0	0
	504	0	0	0	0	0	0	0	0	0	0	0	0	0	0	0	0	0	0	0	0									504	0	0	0	0	0	0	0	0	0	0	0	0	0	0	0	0	0	0	0
	505	0	0	0	0	0	0	0	0	0	0	0	0	0	0	0	0	0	0	0	0									505	0	0	0	0	0	0	0	0	0	0	0	0	0	0	0	0	0	0	0
	506	0	0	0	0	0	0	0	0	0	0	0	0	0	0	0	0	0	0	0	0									506	0	0	0	0	0	0	0	0	0	0	0	0	0	0	0	0	0	0	0
	507	0	0	0	0	0	0	0	0	0	0	0	0	0	0	0	0	0	0	0	0									507	0	0	0	0	0	0	0	0	0	0	0	0	0	0	0	0	0	0	0
	508	0	0	0	0	0	0	0	0	0	0	0	0	0	0	0	0	0	0	0	0									508	0	0	0	0	0	0	0	0	0	0	0	0	0	0	0	0	0	0	0
	509	0	0	0	0	0	0	0	0	0	0	0	0	0	0	0	0	0	0	0	0									509	0	0	0	0	0	0	0	0	0	0	0	0	0	0	0	0	0	0	0
	510	0	0	0	0	0	0	0	0	0	0	0	0	0	0	0	0	0	0	0	0									510	0	0	0	0	0	0	0	0	0	0	0	0	0	0	0	0	0	0	0
	511	0	0	0	0	0	0	0	0	0	0	0	0	0	0	0	0	0	0	0	0									511	0	0	0	0	0	0	0	0	0	0	0	0	0	0	0	0	0	0	0
	512	0	0	0	0	0	0	0	0	0	0	0	0	0	0	0	0	0	0	0	0									512	0	0	0	0	0	0	0	0	0	0	0	0	0	0	0	0	0	0	0
	513	0	0	0	0	0	0	0	0	0	0	0	0	0	0	0	0	0	0	0	0									513	0	0	0	0	0	0	0	0	0	0	0	0	0	0	0	0	0	0	0
	514	0	0	0	0	0	0	0	0	0	0	0	0	0	0	0	0	0	0	0	0									514	0	0	0	0	0	0	0	0	0	0	0	0	0	0	0	0	0	0	0
	515	0	0	0	0	0	0	0	0	0	0	0	0	0	0	0	0	0	0	0	0									515	0	0	0	0	0	0	0	0	0	0	0	0	0	0	0	0	0	0	0
	516	0	0	0	0	0	0	0	0	0	0	0	0	0	0	0	0	0	0	0	0									516	0	0	0	0	0	0	0	0	0	0	0	0	0	0	0	0	0	0	0
	517	0	0	0	0	0	0	0	0	0	0	0	0	0	0	0	0	0	0	0	0									517	0	0	0	0	0	0	0	0	0	0	0	0	0	0	0	0	0	0	0
	518	0	0	0	0	0	0	0	0	0	0	0	0	0	0	0	0	0	0	0	0									518	0	0	0	0	0	0	0	0	0	0	0	0	0	0	0	0	0	0	0
	519	0	0	0	0	0	0	0	0	0	0	0	0	0	0	0	0	0	0	0	0									519	0	0	0	0	0	0	0	0	0	0	0	0	0	0	0	0	0	0	0
	520	0	0	0	0	0	0	0	0	0	0	0	0	0	0	0	0	0	0	0	0									520	0	0	0	0	0	0	0	0	0	0	0	0	0	0	0	0	0	0	0
	521	0	0	0	0	0	0	0	0	0	0	0	0	0	0	0	0	0	0	0	0									521	0	0	0	0	0	0	0	0	0	0	0	0	0	0	0	0	0	0	0
	522	0	0	0	0	0	0	0	0	0	0	0	0	0	0	0	0	0	0	0	0									522	0	0	0	0	0	0	0	0	0	0	0	0	0	0	0	0	0	0	0
	523	0	0	0	0	0	0	0	0	0	0	0	0	0	0	0	0	0	0	0	0									523	0	0	0	0	0	0	0	0	0	0	0	0	0	0	0	0	0	0	0
	524	0	0	0	0	0	0	0	0	0	0	0	0	0	0	0	0	0	0	0	0									524	0	0	0	0	0	0	0	0	0	0	0	0	0	0	0	0	0	0	0
	525	0	0	0	0	0	0	0	0	0	0	0	0	0	0	0	0	0	0	0	0									525	0	0	0	0	0	0	0	0	0	0	0	0	0	0	0	0	0	0	0
	526	0	0	0	0	0	0	0	0	0	0	0	0	0	0	0	0	0	0	0	0									526	0	0	0	0	0	0	0	0	0	0	0	0	0	0	0	0	0	0	0
	527	0	0	0	0	0	0	0	0	0	0	0	0	0	0	0	0	0	0	0	0									527	0	0	0	0	0	0	0	0	0	0	0	0	0	0	0	0	0	0	0
	528	0	0	0	0	0	0	0	0	0	0	0	0	0	0	0	0	0	0	0	0									528	0	0	0	0	0	0	0	0	0	0	0	0	0	0	0	0	0	0	0
	529	0	0	0	0	0	0	0	0	0	0	0	0	0	0	0	0	0	0	0	0									529	0	0	0	0	0	0	0	0	0	0	0	0	0	0	0	0	0	0	0
	530	0	0	0	0	0	0	0	0	0	0	0	0	0	0	0	0	0	0	0	0									530	0	0	0	0	0	0	0	0	0	0	0	0	0	0	0	0	0	0	0
	531	0	0	0	0	0	0	0	0	0	0	0	0	0	0	0	0	0	0	0	0									531	0	0	0	0	0	0	0	0	0	0	0	0	0	0	0	0	0	0	0
	532	0	0	0	0	0	0	0	0	0	0	0	0	0	0	0	0	0	0	0	0									532	0	0	0	0	0	0	0	0	0	0	0	0	0	0	0	0	0	0	0
	533	0	0	0	0	0	0	0	0	0	0	0	0	0	0	0	0	0	0	0	0									533	0	0	0	0	0	0	0	0	0	0	0	0	0	0	0	0	0	0	0
	534	0	0	0	0	0	0	0	0	0	0	0	0	0	0	0	0	0	0	0	0									534	0	0	0	0	0	0	0	0	0	0	0	0	0	0	0	0	0	0	0
	535	0	0	0	0	0	0	0	0	0	0	0	0	0	0	0	0	0	0	0	0									535	0	0	0	0	0	0	0	0	0	0	0	0	0	0	0	0	0	0	0
	536	0	0	0	0	0	0	0	0	0	0	0	0	0	0	0	0	0	0	0	0									536	0	0	0	0	0	0	0	0	0	0	0	0	0	0	0	0	0	0	0
	537	0	0	0	0	0	0	0	0	0	0	0	0	0	0	0	0	0	0	0	0									537	0	0	0	0	0	0	0	0	0	0	0	0	0	0	0	0	0	0	0
	538	0	0	0	0	0	0	0	0	0	0	0	0	0	0	0	0	0	0	0	0									538	0	0	0	0	0	0	0	0	0	0	0	0	0	0	0	0	0	0	0
	539	0	0	0	0	0	0	0	0	0	0	0	0	0	0	0	0	0	0	0	0									539	0	0	0	0	0	0	0	0	0	0	0	0	0	0	0	0	0	0	0
	540	0	0	0	0	0	0	0	0	0	0	0	0	0	0	0	0	0	0	0	0									540	0	0	0	0	0	0	0	0	0	0	0	0	0	0	0	0	0	0	0
	541	0	0	0	0	0	0	0	0	0	0	0	0	0	0	0	0	0	0	0	0									541	0	0	0	0	0	0	0	0	0	0	0	0	0	0	0	0	0	0	0
	542	0	0	0	0	0	0	0	0	0	0	0	0	0	0	0	0	0	0	0	0									542	0	0	0	0	0	0	0	0	0	0	0	0	0	0	0	0	0	0	0
	543	0	0	0	0	0	0	0	0	0	0	0	0	0	0	0	0	0	0	0	0									543	0	0	0	0	0	0	0	0	0	0	0	0	0	0	0	0	0	0	0
	544	0	0	0	0	0	0	0	0	0	0	0	0	0	0	0	0	0	0	0	0									544	0	0	0	0	0	0	0	0	0	0	0	0	0	0	0	0	0	0	0
	545	0	0	0	0	0	0	0	0	0	0	0	0	0	0	0	0	0	0	0	0									545	0	0	0	0	0	0	0	0	0	0	0	0	0	0	0	0	0	0	0
	546	0	0	0	0	0	0	0	0	0	0	0	0	0	0	0	0	0	0	0	0									546	0	0	0	0	0	0	0	0	0	0	0	0	0	0	0	0	0	0	0
	547	0	0	0	0	0	0	0	0	0	0	0	0	0	0	0	0	0	0	0	0									547	0	0	0	0	0	0	0	0	0	0	0	0	0	0	0	0	0	0	0
	548	0	0	0	0	0	0	0	0	0	0	0	0	0	0	0	0	0	0	0	0									548	0	0	0	0	0	0	0	0	0	0	0	0	0	0	0	0	0	0	0
	549	0	0	0	0	0	0	0	0	0	0	0	0	0	0	0	0	0	0	0	0									549	0	0	0	0	0	0	0	0	0	0	0	0	0	0	0	0	0	0	0
	550	0	0	0	0	0	0	0	0	0	0	0	0	0	0	0	0	0	0	0	0									550	0	0	0	0	0	0	0	0	0	0	0	0	0	0	0	0	0	0	0
	551	0	0	0	0	0	0	0	0	0	0	0	0	0	0	0	0	0	0	0	0									551	0	0	0	0	0	0	0	0	0	0	0	0	0	0	0	0	0	0	0
	552	0	0	0	0	0	0	0	0	0	0	0	0	0	0	0	0	0	0	0	0									552	0	0	0	0	0	0	0	0	0	0	0	0	0	0	0	0	0	0	0
	553	0	0	0	0	0	0	0	0	0	0	0	0	0	0	0	0	0	0	0	0									553	0	0	0	0	0	0	0	0	0	0	0	0	0	0	0	0	0	0	0
	554	0	0	0	0	0	0	0	0	0	0	0	0	0	0	0	0	0	0	0	0									554	0	0	0	0	0	0	0	0	0	0	0	0	0	0	0	0	0	0	0
	555	0	0	0	0	0	0	0	0	0	0	0	0	0	0	0	0	0	0	0	0									555	0	0	0	0	0	0	0	0	0	0	0	0	0	0	0	0	0	0	0
	556	0	0	0	0	0	0	0	0	0	0	0	0	0	0	0	0	0	0	0	0									556	0	0	0	0	0	0	0	0	0	0	0	0	0	0	0	0	0	0	0
	557	0	0	0	0	0	0	0	0	0	0	0	0	0	0	0	0	0	0	0	0									557	0	0	0	0	0	0	0	0	0	0	0	0	0	0	0	0	0	0	0
	558	0	0	0	0	0	0	0	0	0	0	0	0	0	0	0	0	0	0	0	0									558	0	0	0	0	0	0	0	0	0	0	0	0	0	0	0	0	0	0	0
	559	0	0	0	0	0	0	0	0	0	0	0	0	0	0	0	0	0	0	0	0									559	0	0	0	0	0	0	0	0	0	0	0	0	0	0	0	0	0	0	0
	560	0	0	0	0	0	0	0	0	0	0	0	0	0	0	0	0	0	0	0	0									560	0	0	0	0	0	0	0	0	0	0	0	0	0	0	0	0	0	0	0
	561	0	0	0	0	0	0	0	0	0	0	0	0	0	0	0	0	0	0	0	0									561	0	0	0	0	0	0	0	0	0	0	0	0	0	0	0	0	0	0	0
	562	0	0	0	0	0	0	0	0	0	0	0	0	0	0	0	0	0	0	0	0									562	0	0	0	0	0	0	0	0	0	0	0	0	0	0	0	0	0	0	0
	563	0	0	0	0	0	0	0	0	0	0	0	0	0	0	0	0	0	0	0	0									563	0	0	0	0	0	0	0	0	0	0	0	0	0	0	0	0	0	0	0
	564	0	0	0	0	0	0	0	0	0	0	0	0	0	0	0	0	0	0	0	0									564	0	0	0	0	0	0	0	0	0	0	0	0	0	0	0	0	0	0	0
	565	0	0	0	0	0	0	0	0	0	0	0	0	0	0	0	0	0	0	0	0									565	0	0	0	0	0	0	0	0	0	0	0	0	0	0	0	0	0	0	0
	566	0	0	0	0	0	0	0	0	0	0	0	0	0	0	0	0	0	0	0	0									566	0	0	0	0	0	0	0	0	0	0	0	0	0	0	0	0	0	0	0
	567	0	0	0	0	0	0	0	0	0	0	0	0	0	0	0	0	0	0	0	0									567	0	0	0	0	0	0	0	0	0	0	0	0	0	0	0	0	0	0	0
	568	0	0	0	0	0	0	0	0	0	0	0	0	0	0	0	0	0	0	0	0									568	0	0	0	0	0	0	0	0	0	0	0	0	0	0	0	0	0	0	0
	569	0	0	0	0	0	0	0	0	0	0	0	0	0	0	0	0	0	0	0	0									569	0	0	0	0	0	0	0	0	0	0	0	0	0	0	0	0	0	0	0
	570	0	0	0	0	0	0	0	0	0	0	0	0	0	0	0	0	0	0	0	0									570	0	0	0	0	0	0	0	0	0	0	0	0	0	0	0	0	0	0	0
	571	0	0	0	0	0	0	0	0	0	0	0	0	0	0	0	0	0	0	0	0									571	0	0	0	0	0	0	0	0	0	0	0	0	0	0	0	0	0	0	0
	572	0	0	0	0	0	0	0	0	0	0	0	0	0	0	0	0	0	0	0	0									572	0	0	0	0	0	0	0	0	0	0	0	0	0	0	0	0	0	0	0
	573	0	0	0	0	0	0	0	0	0	0	0	0	0	0	0	0	0	0	0	0									573	0	0	0	0	0	0	0	0	0	0	0	0	0	0	0	0	0	0	0
	574	0	0	0	0	0	0	0	0	0	0	0	0	0	0	0	0	0	0	0	0									574	0	0	0	0	0	0	0	0	0	0	0	0	0	0	0	0	0	0	0
	575	0	0	0	0	0	0	0	0	0	0	0	0	0	0	0	0	0	0	0	0									575	0	0	0	0	0	0	0	0	0	0	0	0	0	0	0	0	0	0	0
	576	0	0	0	0	0	0	0	0	0	0	0	0	0	0	0	0	0	0	0	0									576	0	0	0	0	0	0	0	0	0	0	0	0	0	0	0	0	0	0	0
	577	0	0	0	0	0	0	0	0	0	0	0	0	0	0	0	0	0	0	0	0									577	0	0	0	0	0	0	0	0	0	0	0	0	0	0	0	0	0	0	0
	578	0	0	0	0	0	0	0	0	0	0	0	0	0	0	0	0	0	0	0	0									578	0	0	0	0	0	0	0	0	0	0	0	0	0	0	0	0	0	0	0
	579	0	0	0	0	0	0	0	0	0	0	0	0	0	0	0	0	0	0	0	0									579	0	0	0	0	0	0	0	0	0	0	0	0	0	0	0	0	0	0	0
	580	0	0	0	0	0	0	0	0	0	0	0	0	0	0	0	0	0	0	0	0									580	0	0	0	0	0	0	0	0	0	0	0	0	0	0	0	0	0	0	0
	581	0	0	0	0	0	0	0	0	0	0	0	0	0	0	0	0	0	0	0	0									581	0	0	0	0	0	0	0	0	0	0	0	0	0	0	0	0	0	0	0
	582	0	0	0	0	0	0	0	0	0	0	0	0	0	0	0	0	0	0	0	0									582	0	0	0	0	0	0	0	0	0	0	0	0	0	0	0	0	0	0	0
	583	0	0	0	0	0	0	0	0	0	0	0	0	0	0	0	0	0	0	0	0									583	0	0	0	0	0	0	0	0	0	0	0	0	0	0	0	0	0	0	0
	584	0	0	0	0	0	0	0	0	0	0	0	0	0	0	0	0	0	0	0	0									584	0	0	0	0	0	0	0	0	0	0	0	0	0	0	0	0	0	0	0
	585	0	0	0	0	0	0	0	0	0	0	0	0	0	0	0	0	0	0	0	0									585	0	0	0	0	0	0	0	0	0	0	0	0	0	0	0	0	0	0	0
	586	0	0	0	0	0	0	0	0	0	0	0	0	0	0	0	0	0	0	0	0									586	0	0	0	0	0	0	0	0	0	0	0	0	0	0	0	0	0	0	0
	587	0	0	0	0	0	0	0	0	0	0	0	0	0	0	0	0	0	0	0	0									587	0	0	0	0	0	0	0	0	0	0	0	0	0	0	0	0	0	0	0
	588	0	0	0	0	0	0	0	0	0	0	0	0	0	0	0	0	0	0	0	0									588	0	0	0	0	0	0	0	0	0	0	0	0	0	0	0	0	0	0	0
	589	0	0	0	0	0	0	0	0	0	0	0	0	0	0	0	0	0	0	0	0									589	0	0	0	0	0	0	0	0	0	0	0	0	0	0	0	0	0	0	0
	590	0	0	0	0	0	0	0	0	0	0	0	0	0	0	0	0	0	0	0	0									590	0	0	0	0	0	0	0	0	0	0	0	0	0	0	0	0	0	0	0
	591	0	0	0	0	0	0	0	0	0	0	0	0	0	0	0	0	0	0	0	0									591	0	0	0	0	0	0	0	0	0	0	0	0	0	0	0	0	0	0	0
	592	0	0	0	0	0	0	0	0	0	0	0	0	0	0	0	0	0	0	0	0									592	0	0	0	0	0	0	0	0	0	0	0	0	0	0	0	0	0	0	0
	593	0	0	0	0	0	0	0	0	0	0	0	0	0	0	0	0	0	0	0	0									593	0	0	0	0	0	0	0	0	0	0	0	0	0	0	0	0	0	0	0
	594	0	0	0	0	0	0	0	0	0	0	0	0	0	0	0	0	0	0	0	0									594	0	0	0	0	0	0	0	0	0	0	0	0	0	0	0	0	0	0	0
	595	0	0	0	0	0	0	0	0	0	0	0	0	0	0	0	0	0	0	0	0									595	0	0	0	0	0	0	0	0	0	0	0	0	0	0	0	0	0	0	0
	596	0	0	0	0	0	0	0	0	0	0	0	0	0	0	0	0	0	0	0	0									596	0	0	0	0	0	0	0	0	0	0	0	0	0	0	0	0	0	0	0
	597	0	0	0	0	0	0	0	0	0	0	0	0	0	0	0	0	0	0	0	0									597	0	0	0	0	0	0	0	0	0	0	0	0	0	0	0	0	0	0	0
	598	0	0	0	0	0	0	0	0	0	0	0	0	0	0	0	0	0	0	0	0									598	0	0	0	0	0	0	0	0	0	0	0	0	0	0	0	0	0	0	0
	599	0	0	0	0	0	0	0	0	0	0	0	0	0	0	0	0	0	0	0	0									599	0	0	0	0	0	0	0	0	0	0	0	0	0	0	0	0	0	0	0
	600	0	0	0	0	0	0	0	0	0	0	0	0	0	0	0	0	0	0	0	0									600	0	0	0	0	0	0	0	0	0	0	0	0	0	0	0	0	0	0	0
	601	0	0	0	0	0	0	0	0	0	0	0	0	0	0	0	0	0	0	0	0									601	0	0	0	0	0	0	0	0	0	0	0	0	0	0	0	0	0	0	0
	602	0	0	0	0	0	0	0	0	0	0	0	0	0	0	0	0	0	0	0	0									602	0	0	0	0	0	0	0	0	0	0	0	0	0	0	0	0	0	0	0
	603	0	0	0	0	0	0	0	0	0	0	0	0	0	0	0	0	0	0	0	0									603	0	0	0	0	0	0	0	0	0	0	0	0	0	0	0	0	0	0	0
	604	0	0	0	0	0	0	0	0	0	0	0	0	0	0	0	0	0	0	0	0									604	0	0	0	0	0	0	0	0	0	0	0	0	0	0	0	0	0	0	0
	605	0	0	0	0	0	0	0	0	0	0	0	0	0	0	0	0	0	0	0	0									605	0	0	0	0	0	0	0	0	0	0	0	0	0	0	0	0	0	0	0
	606	0	0	0	0	0	0	0	0	0	0	0	0	0	0	0	0	0	0	0	0									606	0	0	0	0	0	0	0	0	0	0	0	0	0	0	0	0	0	0	0
	607	0	0	0	0	0	0	0	0	0	0	0	0	0	0	0	0	0	0	0	0									607	0	0	0	0	0	0	0	0	0	0	0	0	0	0	0	0	0	0	0
	608	0	0	0	0	0	0	0	0	0	0	0	0	0	0	0	0	0	0	0	0									608	0	0	0	0	0	0	0	0	0	0	0	0	0	0	0	0	0	0	0
	609	0	0	0	0	0	0	0	0	0	0	0	0	0	0	0	0	0	0	0	0									609	0	0	0	0	0	0	0	0	0	0	0	0	0	0	0	0	0	0	0
	610	0	0	0	0	0	0	0	0	0	0	0	0	0	0	0	0	0	0	0	0									610	0	0	0	0	0	0	0	0	0	0	0	0	0	0	0	0	0	0	0
	611	0	0	0	0	0	0	0	0	0	0	0	0	0	0	0	0	0	0	0	0									611	0	0	0	0	0	0	0	0	0	0	0	0	0	0	0	0	0	0	0
	612	0	0	0	0	0	0	0	0	0	0	0	0	0	0	0	0	0	0	0	0									612	0	0	0	0	0	0	0	0	0	0	0	0	0	0	0	0	0	0	0
	613	0	0	0	0	0	0	0	0	0	0	0	0	0	0	0	0	0	0	0	0									613	0	0	0	0	0	0	0	0	0	0	0	0	0	0	0	0	0	0	0
	614	0	0	0	0	0	0	0	0	0	0	0	0	0	0	0	0	0	0	0	0									614	0	0	0	0	0	0	0	0	0	0	0	0	0	0	0	0	0	0	0
	615	0	0	0	0	0	0	0	0	0	0	0	0	0	0	0	0	0	0	0	0									615	0	0	0	0	0	0	0	0	0	0	0	0	0	0	0	0	0	0	0
	616	0	0	0	0	0	0	0	0	0	0	0	0	0	0	0	0	0	0	0	0									616	0	0	0	0	0	0	0	0	0	0	0	0	0	0	0	0	0	0	0
	617	0	0	0	0	0	0	0	0	0	0	0	0	0	0	0	0	0	0	0	0									617	0	0	0	0	0	0	0	0	0	0	0	0	0	0	0	0	0	0	0
	618	0	0	0	0	0	0	0	0	0	0	0	0	0	0	0	0	0	0	0	0									618	0	0	0	0	0	0	0	0	0	0	0	0	0	0	0	0	0	0	0
	619	0	0	0	0	0	0	0	0	0	0	0	0	0	0	0	0	0	0	0	0									619	0	0	0	0	0	0	0	0	0	0	0	0	0	0	0	0	0	0	0
	620	0	0	0	0	0	0	0	0	0	0	0	0	0	0	0	0	0	0	0	0									620	0	0	0	0	0	0	0	0	0	0	0	0	0	0	0	0	0	0	0
	621	0	0	0	0	0	0	0	0	0	0	0	0	0	0	0	0	0	0	0	0									621	0	0	0	0	0	0	0	0	0	0	0	0	0	0	0	0	0	0	0
	622	0	0	0	0	0	0	0	0	0	0	0	0	0	0	0	0	0	0	0	0									622	0	0	0	0	0	0	0	0	0	0	0	0	0	0	0	0	0	0	0
	623	0	0	0	0	0	0	0	0	0	0	0	0	0	0	0	0	0	0	0	0									623	0	0	0	0	0	0	0	0	0	0	0	0	0	0	0	0	0	0	0
	624	0	0	0	0	0	0	0	0	0	0	0	0	0	0	0	0	0	0	0	0									624	0	0	0	0	0	0	0	0	0	0	0	0	0	0	0	0	0	0	0
	625	0	0	0	0	0	0	0	0	0	0	0	0	0	0	0	0	0	0	0	0									625	0	0	0	0	0	0	0	0	0	0	0	0	0	0	0	0	0	0	0
	626	0	0	0	0	0	0	0	0	0	0	0	0	0	0	0	0	0	0	0	0									626	0	0	0	0	0	0	0	0	0	0	0	0	0	0	0	0	0	0	0
	627	0	0	0	0	0	0	0	0	0	0	0	0	0	0	0	0	0	0	0	0									627	0	0	0	0	0	0	0	0	0	0	0	0	0	0	0	0	0	0	0
	628	0	0	0	0	0	0	0	0	0	0	0	0	0	0	0	0	0	0	0	0									628	0	0	0	0	0	0	0	0	0	0	0	0	0	0	0	0	0	0	0
	629	0	0	0	0	0	0	0	0	0	0	0	0	0	0	0	0	0	0	0	0									629	0	0	0	0	0	0	0	0	0	0	0	0	0	0	0	0	0	0	0
	630	0	0	0	0	0	0	0	0	0	0	0	0	0	0	0	0	0	0	0	0									630	0	0	0	0	0	0	0	0	0	0	0	0	0	0	0	0	0	0	0
	631	0	0	0	0	0	0	0	0	0	0	0	0	0	0	0	0	0	0	0	0									631	0	0	0	0	0	0	0	0	0	0	0	0	0	0	0	0	0	0	0
	632	0	0	0	0	0	0	0	0	0	0	0	0	0	0	0	0	0	0	0	0									632	0	0	0	0	0	0	0	0	0	0	0	0	0	0	0	0	0	0	0
	633	0	0	0	0	0	0	0	0	0	0	0	0	0	0	0	0	0	0	0	0									633	0	0	0	0	0	0	0	0	0	0	0	0	0	0	0	0	0	0	0
	634	0	0	0	0	0	0	0	0	0	0	0	0	0	0	0	0	0	0	0	0									634	0	0	0	0	0	0	0	0	0	0	0	0	0	0	0	0	0	0	0
	635	0	0	0	0	0	0	0	0	0	0	0	0	0	0	0	0	0	0	0	0									635	0	0	0	0	0	0	0	0	0	0	0	0	0	0	0	0	0	0	0
	636	0	0	0	0	0	0	0	0	0	0	0	0	0	0	0	0	0	0	0	0									636	0	0	0	0	0	0	0	0	0	0	0	0	0	0	0	0	0	0	0
	637	0	0	0	0	0	0	0	0	0	0	0	0	0	0	0	0	0	0	0	0									637	0	0	0	0	0	0	0	0	0	0	0	0	0	0	0	0	0	0	0
	638	0	0	0	0	0	0	0	0	0	0	0	0	0	0	0	0	0	0	0	0									638	0	0	0	0	0	0	0	0	0	0	0	0	0	0	0	0	0	0	0
	639	0	0	0	0	0	0	0	0	0	0	0	0	0	0	0	0	0	0	0	0									639	0	0	0	0	0	0	0	0	0	0	0	0	0	0	0	0	0	0	0
	640	0	0	0	0	0	0	0	0	0	0	0	0	0	0	0	0	0	0	0	0									640	0	0	0	0	0	0	0	0	0	0	0	0	0	0	0	0	0	0	0
	641	0	0	0	0	0	0	0	0	0	0	0	0	0	0	0	0	0	0	0	0									641	0	0	0	0	0	0	0	0	0	0	0	0	0	0	0	0	0	0	0
	642	0	0	0	0	0	0	0	0	0	0	0	0	0	0	0	0	0	0	0	0									642	0	0	0	0	0	0	0	0	0	0	0	0	0	0	0	0	0	0	0
	643	0	0	0	0	0	0	0	0	0	0	0	0	0	0	0	0	0	0	0	0									643	0	0	0	0	0	0	0	0	0	0	0	0	0	0	0	0	0	0	0
	644	0	0	0	0	0	0	0	0	0	0	0	0	0	0	0	0	0	0	0	0									644	0	0	0	0	0	0	0	0	0	0	0	0	0	0	0	0	0	0	0
	645	0	0	0	0	0	0	0	0	0	0	0	0	0	0	0	0	0	0	0	0									645	0	0	0	0	0	0	0	0	0	0	0	0	0	0	0	0	0	0	0
	646	0	0	0	0	0	0	0	0	0	0	0	0	0	0	0	0	0	0	0	0									646	0	0	0	0	0	0	0	0	0	0	0	0	0	0	0	0	0	0	0
	647	0	0	0	0	0	0	0	0	0	0	0	0	0	0	0	0	0	0	0	0									647	0	0	0	0	0	0	0	0	0	0	0	0	0	0	0	0	0	0	0
	648	0	0	0	0	0	0	0	0	0	0	0	0	0	0	0	0	0	0	0	0									648	0	0	0	0	0	0	0	0	0	0	0	0	0	0	0	0	0	0	0
	649	0	0	0	0	0	0	0	0	0	0	0	0	0	0	0	0	0	0	0	0									649	0	0	0	0	0	0	0	0	0	0	0	0	0	0	0	0	0	0	0
	650	0	0	0	0	0	0	0	0	0	0	0	0	0	0	0	0	0	0	0	0									650	0	0	0	0	0	0	0	0	0	0	0	0	0	0	0	0	0	0	0
	651	0	0	0	0	0	0	0	0	0	0	0	0	0	0	0	0	0	0	0	0									651	0	0	0	0	0	0	0	0	0	0	0	0	0	0	0	0	0	0	0
	652	0	0	0	0	0	0	0	0	0	0	0	0	0	0	0	0	0	0	0	0									652	0	0	0	0	0	0	0	0	0	0	0	0	0	0	0	0	0	0	0
	653	0	0	0	0	0	0	0	0	0	0	0	0	0	0	0	0	0	0	0	0									653	0	0	0	0	0	0	0	0	0	0	0	0	0	0	0	0	0	0	0
	654	0	0	0	0	0	0	0	0	0	0	0	0	0	0	0	0	0	0	0	0									654	0	0	0	0	0	0	0	0	0	0	0	0	0	0	0	0	0	0	0
	655	0	0	0	0	0	0	0	0	0	0	0	0	0	0	0	0	0	0	0	0									655	0	0	0	0	0	0	0	0	0	0	0	0	0	0	0	0	0	0	0
	656	0	0	0	0	0	0	0	0	0	0	0	0	0	0	0	0	0	0	0	0									656	0	0	0	0	0	0	0	0	0	0	0	0	0	0	0	0	0	0	0
	657	0	0	0	0	0	0	0	0	0	0	0	0	0	0	0	0	0	0	0	0									657	0	0	0	0	0	0	0	0	0	0	0	0	0	0	0	0	0	0	0
	658	0	0	0	0	0	0	0	0	0	0	0	0	0	0	0	0	0	0	0	0									658	0	0	0	0	0	0	0	0	0	0	0	0	0	0	0	0	0	0	0
	659	0	0	0	0	0	0	0	0	0	0	0	0	0	0	0	0	0	0	0	0									659	0	0	0	0	0	0	0	0	0	0	0	0	0	0	0	0	0	0	0
	660	0	0	0	0	0	0	0	0	0	0	0	0	0	0	0	0	0	0	0	0									660	0	0	0	0	0	0	0	0	0	0	0	0	0	0	0	0	0	0	0
	661	0	0	0	0	0	0	0	0	0	0	0	0	0	0	0	0	0	0	0	0									661	0	0	0	0	0	0	0	0	0	0	0	0	0	0	0	0	0	0	0
	662	0	0	0	0	0	0	0	0	0	0	0	0	0	0	0	0	0	0	0	0									662	0	0	0	0	0	0	0	0	0	0	0	0	0	0	0	0	0	0	0
	663	0	0	0	0	0	0	0	0	0	0	0	0	0	0	0	0	0	0	0	0									663	0	0	0	0	0	0	0	0	0	0	0	0	0	0	0	0	0	0	0
	664	0	0	0	0	0	0	0	0	0	0	0	0	0	0	0	0	0	0	0	0									664	0	0	0	0	0	0	0	0	0	0	0	0	0	0	0	0	0	0	0
	665	0	0	0	0	0	0	0	0	0	0	0	0	0	0	0	0	0	0	0	0									665	0	0	0	0	0	0	0	0	0	0	0	0	0	0	0	0	0	0	0
	666	0	0	0	0	0	0	0	0	0	0	0	0	0	0	0	0	0	0	0	0									666	0	0	0	0	0	0	0	0	0	0	0	0	0	0	0	0	0	0	0
	667	0	0	0	0	0	0	0	0	0	0	0	0	0	0	0	0	0	0	0	0									667	0	0	0	0	0	0	0	0	0	0	0	0	0	0	0	0	0	0	0
	668	0	0	0	0	0	0	0	0	0	0	0	0	0	0	0	0	0	0	0	0									668	0	0	0	0	0	0	0	0	0	0	0	0	0	0	0	0	0	0	0
	669	0	0	0	0	0	0	0	0	0	0	0	0	0	0	0	0	0	0	0	0									669	0	0	0	0	0	0	0	0	0	0	0	0	0	0	0	0	0	0	0
	670	0	0	0	0	0	0	0	0	0	0	0	0	0	0	0	0	0	0	0	0									670	0	0	0	0	0	0	0	0	0	0	0	0	0	0	0	0	0	0	0
	671	0	0	0	0	0	0	0	0	0	0	0	0	0	0	0	0	0	0	0	0									671	0	0	0	0	0	0	0	0	0	0	0	0	0	0	0	0	0	0	0
	672	0	0	0	0	0	0	0	0	0	0	0	0	0	0	0	0	0	0	0	0									672	0	0	0	0	0	0	0	0	0	0	0	0	0	0	0	0	0	0	0
	673	0	0	0	0	0	0	0	0	0	0	0	0	0	0	0	0	0	0	0	0									673	0	0	0	0	0	0	0	0	0	0	0	0	0	0	0	0	0	0	0
	674	0	0	0	0	0	0	0	0	0	0	0	0	0	0	0	0	0	0	0	0									674	0	0	0	0	0	0	0	0	0	0	0	0	0	0	0	0	0	0	0
	675	0	0	0	0	0	0	0	0	0	0	0	0	0	0	0	0	0	0	0	0									675	0	0	0	0	0	0	0	0	0	0	0	0	0	0	0	0	0	0	0
	676	0	0	0	0	0	0	0	0	0	0	0	0	0	0	0	0	0	0	0	0									676	0	0	0	0	0	0	0	0	0	0	0	0	0	0	0	0	0	0	0
	677	0	0	0	0	0	0	0	0	0	0	0	0	0	0	0	0	0	0	0	0									677	0	0	0	0	0	0	0	0	0	0	0	0	0	0	0	0	0	0	0
	678	0	0	0	0	0	0	0	0	0	0	0	0	0	0	0	0	0	0	0	0									678	0	0	0	0	0	0	0	0	0	0	0	0	0	0	0	0	0	0	0
	679	0	0	0	0	0	0	0	0	0	0	0	0	0	0	0	0	0	0	0	0									679	0	0	0	0	0	0	0	0	0	0	0	0	0	0	0	0	0	0	0
	680	0	0	0	0	0	0	0	0	0	0	0	0	0	0	0	0	0	0	0	0									680	0	0	0	0	0	0	0	0	0	0	0	0	0	0	0	0	0	0	0
	681	0	0	0	0	0	0	0	0	0	0	0	0	0	0	0	0	0	0	0	0									681	0	0	0	0	0	0	0	0	0	0	0	0	0	0	0	0	0	0	0
	682	0	0	0	0	0	0	0	0	0	0	0	0	0	0	0	0	0	0	0	0									682	0	0	0	0	0	0	0	0	0	0	0	0	0	0	0	0	0	0	0
	683	0	0	0	0	0	0	0	0	0	0	0	0	0	0	0	0	0	0	0	0									683	0	0	0	0	0	0	0	0	0	0	0	0	0	0	0	0	0	0	0
	684	0	0	0	0	0	0	0	0	0	0	0	0	0	0	0	0	0	0	0	0									684	0	0	0	0	0	0	0	0	0	0	0	0	0	0	0	0	0	0	0
	685	0	0	0	0	0	0	0	0	0	0	0	0	0	0	0	0	0	0	0	0									685	0	0	0	0	0	0	0	0	0	0	0	0	0	0	0	0	0	0	0
	686	0	0	0	0	0	0	0	0	0	0	0	0	0	0	0	0	0	0	0	0									686	0	0	0	0	0	0	0	0	0	0	0	0	0	0	0	0	0	0	0
	687	0	0	0	0	0	0	0	0	0	0	0	0	0	0	0	0	0	0	0	0									687	0	0	0	0	0	0	0	0	0	0	0	0	0	0	0	0	0	0	0
	688	0	0	0	0	0	0	0	0	0	0	0	0	0	0	0	0	0	0	0	0									688	0	0	0	0	0	0	0	0	0	0	0	0	0	0	0	0	0	0	0
	689	0	0	0	0	0	0	0	0	0	0	0	0	0	0	0	0	0	0	0	0									689	0	0	0	0	0	0	0	0	0	0	0	0	0	0	0	0	0	0	0
	690	0	0	0	0	0	0	0	0	0	0	0	0	0	0	0	0	0	0	0	0									690	0	0	0	0	0	0	0	0	0	0	0	0	0	0	0	0	0	0	0
	691	0	0	0	0	0	0	0	0	0	0	0	0	0	0	0	0	0	0	0	0									691	0	0	0	0	0	0	0	0	0	0	0	0	0	0	0	0	0	0	0
	692	0	0	0	0	0	0	0	0	0	0	0	0	0	0	0	0	0	0	0	0									692	0	0	0	0	0	0	0	0	0	0	0	0	0	0	0	0	0	0	0
	693	0	0	0	0	0	0	0	0	0	0	0	0	0	0	0	0	0	0	0	0									693	0	0	0	0	0	0	0	0	0	0	0	0	0	0	0	0	0	0	0
	694	0	0	0	0	0	0	0	0	0	0	0	0	0	0	0	0	0	0	0	0									694	0	0	0	0	0	0	0	0	0	0	0	0	0	0	0	0	0	0	0
	695	0	0	0	0	0	0	0	0	0	0	0	0	0	0	0	0	0	0	0	0									695	0	0	0	0	0	0	0	0	0	0	0	0	0	0	0	0	0	0	0
	696	0	0	0	0	0	0	0	0	0	0	0	0	0	0	0	0	0	0	0	0									696	0	0	0	0	0	0	0	0	0	0	0	0	0	0	0	0	0	0	0
	697	0	0	0	0	0	0	0	0	0	0	0	0	0	0	0	0	0	0	0	0									697	0	0	0	0	0	0	0	0	0	0	0	0	0	0	0	0	0	0	0
	698	0	0	0	0	0	0	0	0	0	0	0	0	0	0	0	0	0	0	0	0									698	0	0	0	0	0	0	0	0	0	0	0	0	0	0	0	0	0	0	0
	699	0	0	0	0	0	0	0	0	0	0	0	0	0	0	0	0	0	0	0	0									699	0	0	0	0	0	0	0	0	0	0	0	0	0	0	0	0	0	0	0
	700	0	0	0	0	0	0	0	0	0	0	0	0	0	0	0	0	0	0	0	0									700	0	0	0	0	0	0	0	0	0	0	0	0	0	0	0	0	0	0	0
	701	0	0	0	0	0	0	0	0	0	0	0	0	0	0	0	0	0	0	0	0									701	0	0	0	0	0	0	0	0	0	0	0	0	0	0	0	0	0	0	0
	702	0	0	0	0	0	0	0	0	0	0	0	0	0	0	0	0	0	0	0	0									702	0	0	0	0	0	0	0	0	0	0	0	0	0	0	0	0	0	0	0
	703	0	0	0	0	0	0	0	0	0	0	0	0	0	0	0	0	0	0	0	0									703	0	0	0	0	0	0	0	0	0	0	0	0	0	0	0	0	0	0	0
	704	0	0	0	0	0	0	0	0	0	0	0	0	0	0	0	0	0	0	0	0									704	0	0	0	0	0	0	0	0	0	0	0	0	0	0	0	0	0	0	0
	705	0	0	0	0	0	0	0	0	0	0	0	0	0	0	0	0	0	0	0	0									705	0	0	0	0	0	0	0	0	0	0	0	0	0	0	0	0	0	0	0
	706	0	0	0	0	0	0	0	0	0	0	0	0	0	0	0	0	0	0	0	0									706	0	0	0	0	0	0	0	0	0	0	0	0	0	0	0	0	0	0	0
	707	0	0	0	0	0	0	0	0	0	0	0	0	0	0	0	0	0	0	0	0									707	0	0	0	0	0	0	0	0	0	0	0	0	0	0	0	0	0	0	0
	708	0	0	0	0	0	0	0	0	0	0	0	0	0	0	0	0	0	0	0	0									708	0	0	0	0	0	0	0	0	0	0	0	0	0	0	0	0	0	0	0
	709	0	0	0	0	0	0	0	0	0	0	0	0	0	0	0	0	0	0	0	0									709	0	0	0	0	0	0	0	0	0	0	0	0	0	0	0	0	0	0	0
	710	0	0	0	0	0	0	0	0	0	0	0	0	0	0	0	0	0	0	0	0									710	0	0	0	0	0	0	0	0	0	0	0	0	0	0	0	0	0	0	0
	711	0	0	0	0	0	0	0	0	0	0	0	0	0	0	0	0	0	0	0	0									711	0	0	0	0	0	0	0	0	0	0	0	0	0	0	0	0	0	0	0
	712	0	0	0	0	0	0	0	0	0	0	0	0	0	0	0	0	0	0	0	0									712	0	0	0	0	0	0	0	0	0	0	0	0	0	0	0	0	0	0	0
	713	0	0	0	0	0	0	0	0	0	0	0	0	0	0	0	0	0	0	0	0									713	0	0	0	0	0	0	0	0	0	0	0	0	0	0	0	0	0	0	0
	714	0	0	0	0	0	0	0	0	0	0	0	0	0	0	0	0	0	0	0	0									714	0	0	0	0	0	0	0	0	0	0	0	0	0	0	0	0	0	0	0
	715	0	0	0	0	0	0	0	0	0	0	0	0	0	0	0	0	0	0	0	0									715	0	0	0	0	0	0	0	0	0	0	0	0	0	0	0	0	0	0	0
	716	0	0	0	0	0	0	0	0	0	0	0	0	0	0	0	0	0	0	0	0									716	0	0	0	0	0	0	0	0	0	0	0	0	0	0	0	0	0	0	0
	717	0	0	0	0	0	0	0	0	0	0	0	0	0	0	0	0	0	0	0	0									717	0	0	0	0	0	0	0	0	0	0	0	0	0	0	0	0	0	0	0
	718	0	0	0	0	0	0	0	0	0	0	0	0	0	0	0	0	0	0	0	0									718	0	0	0	0	0	0	0	0	0	0	0	0	0	0	0	0	0	0	0
	719	0	0	0	0	0	0	0	0	0	0	0	0	0	0	0	0	0	0	0	0									719	0	0	0	0	0	0	0	0	0	0	0	0	0	0	0	0	0	0	0
	720	0	0	0	0	0	0	0	0	0	0	0	0	0	0	0	0	0	0	0	0									720	0	0	0	0	0	0	0	0	0	0	0	0	0	0	0	0	0	0	0
	721	0	0	0	0	0	0	0	0	0	0	0	0	0	0	0	0	0	0	0	0									721	0	0	0	0	0	0	0	0	0	0	0	0	0	0	0	0	0	0	0
	722	0	0	0	0	0	0	0	0	0	0	0	0	0	0	0	0	0	0	0	0									722	0	0	0	0	0	0	0	0	0	0	0	0	0	0	0	0	0	0	0
	723	0	0	0	0	0	0	0	0	0	0	0	0	0	0	0	0	0	0	0	0									723	0	0	0	0	0	0	0	0	0	0	0	0	0	0	0	0	0	0	0
	724	0	0	0	0	0	0	0	0	0	0	0	0	0	0	0	0	0	0	0	0									724	0	0	0	0	0	0	0	0	0	0	0	0	0	0	0	0	0	0	0
	725	0	0	0	0	0	0	0	0	0	0	0	0	0	0	0	0	0	0	0	0									725	0	0	0	0	0	0	0	0	0	0	0	0	0	0	0	0	0	0	0
	726	0	0	0	0	0	0	0	0	0	0	0	0	0	0	0	0	0	0	0	0									726	0	0	0	0	0	0	0	0	0	0	0	0	0	0	0	0	0	0	0
	727	0	0	0	0	0	0	0	0	0	0	0	0	0	0	0	0	0	0	0	0									727	0	0	0	0	0	0	0	0	0	0	0	0	0	0	0	0	0	0	0
	728	0	0	0	0	0	0	0	0	0	0	0	0	0	0	0	0	0	0	0	0									728	0	0	0	0	0	0	0	0	0	0	0	0	0	0	0	0	0	0	0
	729	0	0	0	0	0	0	0	0	0	0	0	0	0	0	0	0	0	0	0	0									729	0	0	0	0	0	0	0	0	0	0	0	0	0	0	0	0	0	0	0
	730	0	0	0	0	0	0	0	0	0	0	0	0	0	0	0	0	0	0	0	0									730	0	0	0	0	0	0	0	0	0	0	0	0	0	0	0	0	0	0	0
	731	0	0	0	0	0	0	0	0	0	0	0	0	0	0	0	0	0	0	0	0									731	0	0	0	0	0	0	0	0	0	0	0	0	0	0	0	0	0	0	0
	732	0	0	0	0	0	0	0	0	0	0	0	0	0	0	0	0	0	0	0	0									732	0	0	0	0	0	0	0	0	0	0	0	0	0	0	0	0	0	0	0
	733	0	0	0	0	0	0	0	0	0	0	0	0	0	0	0	0	0	0	0	0									733	0	0	0	0	0	0	0	0	0	0	0	0	0	0	0	0	0	0	0
	734	0	0	0	0	0	0	0	0	0	0	0	0	0	0	0	0	0	0	0	0									734	0	0	0	0	0	0	0	0	0	0	0	0	0	0	0	0	0	0	0
	735	0	0	0	0	0	0	0	0	0	0	0	0	0	0	0	0	0	0	0	0									735	0	0	0	0	0	0	0	0	0	0	0	0	0	0	0	0	0	0	0
	736	0	0	0	0	0	0	0	0	0	0	0	0	0	0	0	0	0	0	0	0									736	0	0	0	0	0	0	0	0	0	0	0	0	0	0	0	0	0	0	0
	737	0	0	0	0	0	0	0	0	0	0	0	0	0	0	0	0	0	0	0	0									737	0	0	0	0	0	0	0	0	0	0	0	0	0	0	0	0	0	0	0
	738	0	0	0	0	0	0	0	0	0	0	0	0	0	0	0	0	0	0	0	0									738	0	0	0	0	0	0	0	0	0	0	0	0	0	0	0	0	0	0	0
	739	0	0	0	0	0	0	0	0	0	0	0	0	0	0	0	0	0	0	0	0									739	0	0	0	0	0	0	0	0	0	0	0	0	0	0	0	0	0	0	0
	740	0	0	0	0	0	0	0	0	0	0	0	0	0	0	0	0	0	0	0	0									740	0	0	0	0	0	0	0	0	0	0	0	0	0	0	0	0	0	0	0
	741	0	0	0	0	0	0	0	0	0	0	0	0	0	0	0	0	0	0	0	0									741	0	0	0	0	0	0	0	0	0	0	0	0	0	0	0	0	0	0	0
	742	0	0	0	0	0	0	0	0	0	0	0	0	0	0	0	0	0	0	0	0									742	0	0	0	0	0	0	0	0	0	0	0	0	0	0	0	0	0	0	0
	743	0	0	0	0	0	0	0	0	0	0	0	0	0	0	0	0	0	0	0	0									743	0	0	0	0	0	0	0	0	0	0	0	0	0	0	0	0	0	0	0
	744	0	0	0	0	0	0	0	0	0	0	0	0	0	0	0	0	0	0	0	0									744	0	0	0	0	0	0	0	0	0	0	0	0	0	0	0	0	0	0	0
	745	0	0	0	0	0	0	0	0	0	0	0	0	0	0	0	0	0	0	0	0									745	0	0	0	0	0	0	0	0	0	0	0	0	0	0	0	0	0	0	0
	746	0	0	0	0	0	0	0	0	0	0	0	0	0	0	0	0	0	0	0	0									746	0	0	0	0	0	0	0	0	0	0	0	0	0	0	0	0	0	0	0
	747	0	0	0	0	0	0	0	0	0	0	0	0	0	0	0	0	0	0	0	0									747	0	0	0	0	0	0	0	0	0	0	0	0	0	0	0	0	0	0	0
	748	0	0	0	0	0	0	0	0	0	0	0	0	0	0	0	0	0	0	0	0									748	0	0	0	0	0	0	0	0	0	0	0	0	0	0	0	0	0	0	0
	749	0	0	0	0	0	0	0	0	0	0	0	0	0	0	0	0	0	0	0	0									749	0	0	0	0	0	0	0	0	0	0	0	0	0	0	0	0	0	0	0
	750	0	0	0	0	0	0	0	0	0	0	0	0	0	0	0	0	0	0	0	0									750	0	0	0	0	0	0	0	0	0	0	0	0	0	0	0	0	0	0	0
	751	0	0	0	0	0	0	0	0	0	0	0	0	0	0	0	0	0	0	0	0									751	0	0	0	0	0	0	0	0	0	0	0	0	0	0	0	0	0	0	0
	752	0	0	0	0	0	0	0	0	0	0	0	0	0	0	0	0	0	0	0	0									752	0	0	0	0	0	0	0	0	0	0	0	0	0	0	0	0	0	0	0
	753	0	0	0	0	0	0	0	0	0	0	0	0	0	0	0	0	0	0	0	0									753	0	0	0	0	0	0	0	0	0	0	0	0	0	0	0	0	0	0	0
	754	0	0	0	0	0	0	0	0	0	0	0	0	0	0	0	0	0	0	0	0									754	0	0	0	0	0	0	0	0	0	0	0	0	0	0	0	0	0	0	0
	755	0	0	0	0	0	0	0	0	0	0	0	0	0	0	0	0	0	0	0	0									755	0	0	0	0	0	0	0	0	0	0	0	0	0	0	0	0	0	0	0
	756	0	0	0	0	0	0	0	0	0	0	0	0	0	0	0	0	0	0	0	0									756	0	0	0	0	0	0	0	0	0	0	0	0	0	0	0	0	0	0	0
	757	0	0	0	0	0	0	0	0	0	0	0	0	0	0	0	0	0	0	0	0									757	0	0	0	0	0	0	0	0	0	0	0	0	0	0	0	0	0	0	0
	758	0	0	0	0	0	0	0	0	0	0	0	0	0	0	0	0	0	0	0	0									758	0	0	0	0	0	0	0	0	0	0	0	0	0	0	0	0	0	0	0
	759	0	0	0	0	0	0	0	0	0	0	0	0	0	0	0	0	0	0	0	0									759	0	0	0	0	0	0	0	0	0	0	0	0	0	0	0	0	0	0	0
	760	0	0	0	0	0	0	0	0	0	0	0	0	0	0	0	0	0	0	0	0									760	0	0	0	0	0	0	0	0	0	0	0	0	0	0	0	0	0	0	0
	761	0	0	0	0	0	0	0	0	0	0	0	0	0	0	0	0	0	0	0	0									761	0	0	0	0	0	0	0	0	0	0	0	0	0	0	0	0	0	0	0
	762	0	0	0	0	0	0	0	0	0	0	0	0	0	0	0	0	0	0	0	0									762	0	0	0	0	0	0	0	0	0	0	0	0	0	0	0	0	0	0	0
	763	0	0	0	0	0	0	0	0	0	0	0	0	0	0	0	0	0	0	0	0									763	0	0	0	0	0	0	0	0	0	0	0	0	0	0	0	0	0	0	0
	764	0	0	0	0	0	0	0	0	0	0	0	0	0	0	0	0	0	0	0	0									764	0	0	0	0	0	0	0	0	0	0	0	0	0	0	0	0	0	0	0
	765	0	0	0	0	0	0	0	0	0	0	0	0	0	0	0	0	0	0	0	0									765	0	0	0	0	0	0	0	0	0	0	0	0	0	0	0	0	0	0	0
	766	0	0	0	0	0	0	0	0	0	0	0	0	0	0	0	0	0	0	0	0									766	0	0	0	0	0	0	0	0	0	0	0	0	0	0	0	0	0	0	0
	767	0	0	0	0	0	0	0	0	0	0	0	0	0	0	0	0	0	0	0	0									767	0	0	0	0	0	0	0	0	0	0	0	0	0	0	0	0	0	0	0
	768	0	0	0	0	0	0	0	0	0	0	0	0	0	0	0	0	0	0	0	0									768	0	0	0	0	0	0	0	0	0	0	0	0	0	0	0	0	0	0	0
	769	0	0	0	0	0	0	0	0	0	0	0	0	0	0	0	0	0	0	0	0									769	0	0	0	0	0	0	0	0	0	0	0	0	0	0	0	0	0	0	0
	770	0	0	0	0	0	0	0	0	0	0	0	0	0	0	0	0	0	0	0	0									770	0	0	0	0	0	0	0	0	0	0	0	0	0	0	0	0	0	0	0
	771	0	0	0	0	0	0	0	0	0	0	0	0	0	0	0	0	0	0	0	0									771	0	0	0	0	0	0	0	0	0	0	0	0	0	0	0	0	0	0	0
	772	0	0	0	0	0	0	0	0	0	0	0	0	0	0	0	0	0	0	0	0									772	0	0	0	0	0	0	0	0	0	0	0	0	0	0	0	0	0	0	0
	773	0	0	0	0	0	0	0	0	0	0	0	0	0	0	0	0	0	0	0	0									773	0	0	0	0	0	0	0	0	0	0	0	0	0	0	0	0	0	0	0
	774	0	0	0	0	0	0	0	0	0	0	0	0	0	0	0	0	0	0	0	0									774	0	0	0	0	0	0	0	0	0	0	0	0	0	0	0	0	0	0	0
	775	0	0	0	0	0	0	0	0	0	0	0	0	0	0	0	0	0	0	0	0									775	0	0	0	0	0	0	0	0	0	0	0	0	0	0	0	0	0	0	0
	776	0	0	0	0	0	0	0	0	0	0	0	0	0	0	0	0	0	0	0	0									776	0	0	0	0	0	0	0	0	0	0	0	0	0	0	0	0	0	0	0
	777	0	0	0	0	0	0	0	0	0	0	0	0	0	0	0	0	0	0	0	0									777	0	0	0	0	0	0	0	0	0	0	0	0	0	0	0	0	0	0	0
	778	0	0	0	0	0	0	0	0	0	0	0	0	0	0	0	0	0	0	0	0									778	0	0	0	0	0	0	0	0	0	0	0	0	0	0	0	0	0	0	0
	779	0	0	0	0	0	0	0	0	0	0	0	0	0	0	0	0	0	0	0	0									779	0	0	0	0	0	0	0	0	0	0	0	0	0	0	0	0	0	0	0
	780	0	0	0	0	0	0	0	0	0	0	0	0	0	0	0	0	0	0	0	0									780	0	0	0	0	0	0	0	0	0	0	0	0	0	0	0	0	0	0	0
	781	0	0	0	0	0	0	0	0	0	0	0	0	0	0	0	0	0	0	0	0									781	0	0	0	0	0	0	0	0	0	0	0	0	0	0	0	0	0	0	0
	782	0	0	0	0	0	0	0	0	0	0	0	0	0	0	0	0	0	0	0	0									782	0	0	0	0	0	0	0	0	0	0	0	0	0	0	0	0	0	0	0
	783	0	0	0	0	0	0	0	0	0	0	0	0	0	0	0	0	0	0	0	0									783	0	0	0	0	0	0	0	0	0	0	0	0	0	0	0	0	0	0	0
	784	0	0	0	0	0	0	0	0	0	0	0	0	0	0	0	0	0	0	0	0									784	0	0	0	0	0	0	0	0	0	0	0	0	0	0	0	0	0	0	0
	785	0	0	0	0	0	0	0	0	0	0	0	0	0	0	0	0	0	0	0	0									785	0	0	0	0	0	0	0	0	0	0	0	0	0	0	0	0	0	0	0
	786	0	0	0	0	0	0	0	0	0	0	0	0	0	0	0	0	0	0	0	0									786	0	0	0	0	0	0	0	0	0	0	0	0	0	0	0	0	0	0	0
	787	0	0	0	0	0	0	0	0	0	0	0	0	0	0	0	0	0	0	0	0									787	0	0	0	0	0	0	0	0	0	0	0	0	0	0	0	0	0	0	0
	788	0	0	0	0	0	0	0	0	0	0	0	0	0	0	0	0	0	0	0	0									788	0	0	0	0	0	0	0	0	0	0	0	0	0	0	0	0	0	0	0
	789	0	0	0	0	0	0	0	0	0	0	0	0	0	0	0	0	0	0	0	0									789	0	0	0	0	0	0	0	0	0	0	0	0	0	0	0	0	0	0	0
	790	0	0	0	0	0	0	0	0	0	0	0	0	0	0	0	0	0	0	0	0									790	0	0	0	0	0	0	0	0	0	0	0	0	0	0	0	0	0	0	0
	791	0	0	0	0	0	0	0	0	0	0	0	0	0	0	0	0	0	0	0	0									791	0	0	0	0	0	0	0	0	0	0	0	0	0	0	0	0	0	0	0
	792	0	0	0	0	0	0	0	0	0	0	0	0	0	0	0	0	0	0	0	0									792	0	0	0	0	0	0	0	0	0	0	0	0	0	0	0	0	0	0	0
	793	0	0	0	0	0	0	0	0	0	0	0	0	0	0	0	0	0	0	0	0									793	0	0	0	0	0	0	0	0	0	0	0	0	0	0	0	0	0	0	0
	794	0	0	0	0	0	0	0	0	0	0	0	0	0	0	0	0	0	0	0	0									794	0	0	0	0	0	0	0	0	0	0	0	0	0	0	0	0	0	0	0
	795	0	0	0	0	0	0	0	0	0	0	0	0	0	0	0	0	0	0	0	0									795	0	0	0	0	0	0	0	0	0	0	0	0	0	0	0	0	0	0	0
	796	0	0	0	0	0	0	0	0	0	0	0	0	0	0	0	0	0	0	0	0									796	0	0	0	0	0	0	0	0	0	0	0	0	0	0	0	0	0	0	0
	797	0	0	0	0	0	0	0	0	0	0	0	0	0	0	0	0	0	0	0	0									797	0	0	0	0	0	0	0	0	0	0	0	0	0	0	0	0	0	0	0
	798	0	0	0	0	0	0	0	0	0	0	0	0	0	0	0	0	0	0	0	0									798	0	0	0	0	0	0	0	0	0	0	0	0	0	0	0	0	0	0	0
	799	0	0	0	0	0	0	0	0	0	0	0	0	0	0	0	0	0	0	0	0									799	0	0	0	0	0	0	0	0	0	0	0	0	0	0	0	0	0	0	0
	800	0	0	0	0	0	0	0	0	0	0	0	0	0	0	0	0	0	0	0	0									800	0	0	0	0	0	0	0	0	0	0	0	0	0	0	0	0	0	0	0
	801	0	0	0	0	0	0	0	0	0	0	0	0	0	0	0	0	0	0	0	0									801	0	0	0	0	0	0	0	0	0	0	0	0	0	0	0	0	0	0	0
	802	0	0	0	0	0	0	0	0	0	0	0	0	0	0	0	0	0	0	0	0									802	0	0	0	0	0	0	0	0	0	0	0	0	0	0	0	0	0	0	0
	803	0	0	0	0	0	0	0	0	0	0	0	0	0	0	0	0	0	0	0	0									803	0	0	0	0	0	0	0	0	0	0	0	0	0	0	0	0	0	0	0
	804	0	0	0	0	0	0	0	0	0	0	0	0	0	0	0	0	0	0	0	0									804	0	0	0	0	0	0	0	0	0	0	0	0	0	0	0	0	0	0	0
	805	0	0	0	0	0	0	0	0	0	0	0	0	0	0	0	0	0	0	0	0									805	0	0	0	0	0	0	0	0	0	0	0	0	0	0	0	0	0	0	0
	806	0	0	0	0	0	0	0	0	0	0	0	0	0	0	0	0	0	0	0	0									806	0	0	0	0	0	0	0	0	0	0	0	0	0	0	0	0	0	0	0
	807	0	0	0	0	0	0	0	0	0	0	0	0	0	0	0	0	0	0	0	0									807	0	0	0	0	0	0	0	0	0	0	0	0	0	0	0	0	0	0	0
	808	0	0	0	0	0	0	0	0	0	0	0	0	0	0	0	0	0	0	0	0									808	0	0	0	0	0	0	0	0	0	0	0	0	0	0	0	0	0	0	0
	809	0	0	0	0	0	0	0	0	0	0	0	0	0	0	0	0	0	0	0	0									809	0	0	0	0	0	0	0	0	0	0	0	0	0	0	0	0	0	0	0
	810	0	0	0	0	0	0	0	0	0	0	0	0	0	0	0	0	0	0	0	0									810	0	0	0	0	0	0	0	0	0	0	0	0	0	0	0	0	0	0	0
	811	0	0	0	0	0	0	0	0	0	0	0	0	0	0	0	0	0	0	0	0									811	0	0	0	0	0	0	0	0	0	0	0	0	0	0	0	0	0	0	0
	812	0	0	0	0	0	0	0	0	0	0	0	0	0	0	0	0	0	0	0	0									812	0	0	0	0	0	0	0	0	0	0	0	0	0	0	0	0	0	0	0
	813	0	0	0	0	0	0	0	0	0	0	0	0	0	0	0	0	0	0	0	0									813	0	0	0	0	0	0	0	0	0	0	0	0	0	0	0	0	0	0	0
	814	0	0	0	0	0	0	0	0	0	0	0	0	0	0	0	0	0	0	0	0									814	0	0	0	0	0	0	0	0	0	0	0	0	0	0	0	0	0	0	0
	815	0	0	0	0	0	0	0	0	0	0	0	0	0	0	0	0	0	0	0	0									815	0	0	0	0	0	0	0	0	0	0	0	0	0	0	0	0	0	0	0
	816	0	0	0	0	0	0	0	0	0	0	0	0	0	0	0	0	0	0	0	0									816	0	0	0	0	0	0	0	0	0	0	0	0	0	0	0	0	0	0	0
	817	0	0	0	0	0	0	0	0	0	0	0	0	0	0	0	0	0	0	0	0									817	0	0	0	0	0	0	0	0	0	0	0	0	0	0	0	0	0	0	0
	818	0	0	0	0	0	0	0	0	0	0	0	0	0	0	0	0	0	0	0	0									818	0	0	0	0	0	0	0	0	0	0	0	0	0	0	0	0	0	0	0
	819	0	0	0	0	0	0	0	0	0	0	0	0	0	0	0	0	0	0	0	0									819	0	0	0	0	0	0	0	0	0	0	0	0	0	0	0	0	0	0	0
	820	0	0	0	0	0	0	0	0	0	0	0	0	0	0	0	0	0	0	0	0									820	0	0	0	0	0	0	0	0	0	0	0	0	0	0	0	0	0	0	0
	821	0	0	0	0	0	0	0	0	0	0	0	0	0	0	0	0	0	0	0	0									821	0	0	0	0	0	0	0	0	0	0	0	0	0	0	0	0	0	0	0
	822	0	0	0	0	0	0	0	0	0	0	0	0	0	0	0	0	0	0	0	0									822	0	0	0	0	0	0	0	0	0	0	0	0	0	0	0	0	0	0	0
	823	0	0	0	0	0	0	0	0	0	0	0	0	0	0	0	0	0	0	0	0									823	0	0	0	0	0	0	0	0	0	0	0	0	0	0	0	0	0	0	0
	824	0	0	0	0	0	0	0	0	0	0	0	0	0	0	0	0	0	0	0	0									824	0	0	0	0	0	0	0	0	0	0	0	0	0	0	0	0	0	0	0
	825	0	0	0	0	0	0	0	0	0	0	0	0	0	0	0	0	0	0	0	0									825	0	0	0	0	0	0	0	0	0	0	0	0	0	0	0	0	0	0	0
	826	0	0	0	0	0	0	0	0	0	0	0	0	0	0	0	0	0	0	0	0									826	0	0	0	0	0	0	0	0	0	0	0	0	0	0	0	0	0	0	0
	827	0	0	0	0	0	0	0	0	0	0	0	0	0	0	0	0	0	0	0	0									827	0	0	0	0	0	0	0	0	0	0	0	0	0	0	0	0	0	0	0
	828	0	0	0	0	0	0	0	0	0	0	0	0	0	0	0	0	0	0	0	0									828	0	0	0	0	0	0	0	0	0	0	0	0	0	0	0	0	0	0	0
	829	0	0	0	0	0	0	0	0	0	0	0	0	0	0	0	0	0	0	0	0									829	0	0	0	0	0	0	0	0	0	0	0	0	0	0	0	0	0	0	0
	830	0	0	0	0	0	0	0	0	0	0	0	0	0	0	0	0	0	0	0	0									830	0	0	0	0	0	0	0	0	0	0	0	0	0	0	0	0	0	0	0
	831	0	0	0	0	0	0	0	0	0	0	0	0	0	0	0	0	0	0	0	0									831	0	0	0	0	0	0	0	0	0	0	0	0	0	0	0	0	0	0	0
	832	0	0	0	0	0	0	0	0	0	0	0	0	0	0	0	0	0	0	0	0									832	0	0	0	0	0	0	0	0	0	0	0	0	0	0	0	0	0	0	0
	833	0	0	0	0	0	0	0	0	0	0	0	0	0	0	0	0	0	0	0	0									833	0	0	0	0	0	0	0	0	0	0	0	0	0	0	0	0	0	0	0
	834	0	0	0	0	0	0	0	0	0	0	0	0	0	0	0	0	0	0	0	0									834	0	0	0	0	0	0	0	0	0	0	0	0	0	0	0	0	0	0	0
	835	0	0	0	0	0	0	0	0	0	0	0	0	0	0	0	0	0	0	0	0									835	0	0	0	0	0	0	0	0	0	0	0	0	0	0	0	0	0	0	0
	836	0	0	0	0	0	0	0	0	0	0	0	0	0	0	0	0	0	0	0	0									836	0	0	0	0	0	0	0	0	0	0	0	0	0	0	0	0	0	0	0
	837	0	0	0	0	0	0	0	0	0	0	0	0	0	0	0	0	0	0	0	0									837	0	0	0	0	0	0	0	0	0	0	0	0	0	0	0	0	0	0	0
	838	0	0	0	0	0	0	0	0	0	0	0	0	0	0	0	0	0	0	0	0									838	0	0	0	0	0	0	0	0	0	0	0	0	0	0	0	0	0	0	0
	839	0	0	0	0	0	0	0	0	0	0	0	0	0	0	0	0	0	0	0	0									839	0	0	0	0	0	0	0	0	0	0	0	0	0	0	0	0	0	0	0
	840	0	0	0	0	0	0	0	0	0	0	0	0	0	0	0	0	0	0	0	0									840	0	0	0	0	0	0	0	0	0	0	0	0	0	0	0	0	0	0	0
	841	0	0	0	0	0	0	0	0	0	0	0	0	0	0	0	0	0	0	0	0									841	0	0	0	0	0	0	0	0	0	0	0	0	0	0	0	0	0	0	0
	842	0	0	0	0	0	0	0	0	0	0	0	0	0	0	0	0	0	0	0	0									842	0	0	0	0	0	0	0	0	0	0	0	0	0	0	0	0	0	0	0
	843	0	0	0	0	0	0	0	0	0	0	0	0	0	0	0	0	0	0	0	0									843	0	0	0	0	0	0	0	0	0	0	0	0	0	0	0	0	0	0	0
	844	0	0	0	0	0	0	0	0	0	0	0	0	0	0	0	0	0	0	0	0									844	0	0	0	0	0	0	0	0	0	0	0	0	0	0	0	0	0	0	0
	845	0	0	0	0	0	0	0	0	0	0	0	0	0	0	0	0	0	0	0	0									845	0	0	0	0	0	0	0	0	0	0	0	0	0	0	0	0	0	0	0
	846	0	0	0	0	0	0	0	0	0	0	0	0	0	0	0	0	0	0	0	0									846	0	0	0	0	0	0	0	0	0	0	0	0	0	0	0	0	0	0	0
	847	0	0	0	0	0	0	0	0	0	0	0	0	0	0	0	0	0	0	0	0									847	0	0	0	0	0	0	0	0	0	0	0	0	0	0	0	0	0	0	0
	848	0	0	0	0	0	0	0	0	0	0	0	0	0	0	0	0	0	0	0	0									848	0	0	0	0	0	0	0	0	0	0	0	0	0	0	0	0	0	0	0
	849	0	0	0	0	0	0	0	0	0	0	0	0	0	0	0	0	0	0	0	0									849	0	0	0	0	0	0	0	0	0	0	0	0	0	0	0	0	0	0	0
	850	0	0	0	0	0	0	0	0	0	0	0	0	0	0	0	0	0	0	0	0									850	0	0	0	0	0	0	0	0	0	0	0	0	0	0	0	0	0	0	0
	851	0	0	0	0	0	0	0	0	0	0	0	0	0	0	0	0	0	0	0	0									851	0	0	0	0	0	0	0	0	0	0	0	0	0	0	0	0	0	0	0
	852	0	0	0	0	0	0	0	0	0	0	0	0	0	0	0	0	0	0	0	0									852	0	0	0	0	0	0	0	0	0	0	0	0	0	0	0	0	0	0	0
	853	0	0	0	0	0	0	0	0	0	0	0	0	0	0	0	0	0	0	0	0									853	0	0	0	0	0	0	0	0	0	0	0	0	0	0	0	0	0	0	0
	854	0	0	0	0	0	0	0	0	0	0	0	0	0	0	0	0	0	0	0	0									854	0	0	0	0	0	0	0	0	0	0	0	0	0	0	0	0	0	0	0
	855	0	0	0	0	0	0	0	0	0	0	0	0	0	0	0	0	0	0	0	0									855	0	0	0	0	0	0	0	0	0	0	0	0	0	0	0	0	0	0	0
	856	0	0	0	0	0	0	0	0	0	0	0	0	0	0	0	0	0	0	0	0									856	0	0	0	0	0	0	0	0	0	0	0	0	0	0	0	0	0	0	0
	857	0	0	0	0	0	0	0	0	0	0	0	0	0	0	0	0	0	0	0	0									857	0	0	0	0	0	0	0	0	0	0	0	0	0	0	0	0	0	0	0
	858	0	0	0	0	0	0	0	0	0	0	0	0	0	0	0	0	0	0	0	0									858	0	0	0	0	0	0	0	0	0	0	0	0	0	0	0	0	0	0	0
	859	0	0	0	0	0	0	0	0	0	0	0	0	0	0	0	0	0	0	0	0									859	0	0	0	0	0	0	0	0	0	0	0	0	0	0	0	0	0	0	0
	860	0	0	0	0	0	0	0	0	0	0	0	0	0	0	0	0	0	0	0	0									860	0	0	0	0	0	0	0	0	0	0	0	0	0	0	0	0	0	0	0
	861	0	0	0	0	0	0	0	0	0	0	0	0	0	0	0	0	0	0	0	0									861	0	0	0	0	0	0	0	0	0	0	0	0	0	0	0	0	0	0	0
	862	0	0	0	0	0	0	0	0	0	0	0	0	0	0	0	0	0	0	0	0									862	0	0	0	0	0	0	0	0	0	0	0	0	0	0	0	0	0	0	0
	863	0	0	0	0	0	0	0	0	0	0	0	0	0	0	0	0	0	0	0	0									863	0	0	0	0	0	0	0	0	0	0	0	0	0	0	0	0	0	0	0
	864	0	0	0	0	0	0	0	0	0	0	0	0	0	0	0	0	0	0	0	0									864	0	0	0	0	0	0	0	0	0	0	0	0	0	0	0	0	0	0	0
	865	0	0	0	0	0	0	0	0	0	0	0	0	0	0	0	0	0	0	0	0									865	0	0	0	0	0	0	0	0	0	0	0	0	0	0	0	0	0	0	0
	866	0	0	0	0	0	0	0	0	0	0	0	0	0	0	0	0	0	0	0	0									866	0	0	0	0	0	0	0	0	0	0	0	0	0	0	0	0	0	0	0
	867	0	0	0	0	0	0	0	0	0	0	0	0	0	0	0	0	0	0	0	0									867	0	0	0	0	0	0	0	0	0	0	0	0	0	0	0	0	0	0	0
	868	0	0	0	0	0	0	0	0	0	0	0	0	0	0	0	0	0	0	0	0									868	0	0	0	0	0	0	0	0	0	0	0	0	0	0	0	0	0	0	0
	869	0	0	0	0	0	0	0	0	0	0	0	0	0	0	0	0	0	0	0	0									869	0	0	0	0	0	0	0	0	0	0	0	0	0	0	0	0	0	0	0
	870	0	0	0	0	0	0	0	0	0	0	0	0	0	0	0	0	0	0	0	0									870	0	0	0	0	0	0	0	0	0	0	0	0	0	0	0	0	0	0	0
	871	0	0	0	0	0	0	0	0	0	0	0	0	0	0	0	0	0	0	0	0									871	0	0	0	0	0	0	0	0	0	0	0	0	0	0	0	0	0	0	0
	872	0	0	0	0	0	0	0	0	0	0	0	0	0	0	0	0	0	0	0	0									872	0	0	0	0	0	0	0	0	0	0	0	0	0	0	0	0	0	0	0
	873	0	0	0	0	0	0	0	0	0	0	0	0	0	0	0	0	0	0	0	0									873	0	0	0	0	0	0	0	0	0	0	0	0	0	0	0	0	0	0	0
	874	0	0	0	0	0	0	0	0	0	0	0	0	0	0	0	0	0	0	0	0									874	0	0	0	0	0	0	0	0	0	0	0	0	0	0	0	0	0	0	0
	875	0	0	0	0	0	0	0	0	0	0	0	0	0	0	0	0	0	0	0	0									875	0	0	0	0	0	0	0	0	0	0	0	0	0	0	0	0	0	0	0
	876	0	0	0	0	0	0	0	0	0	0	0	0	0	0	0	0	0	0	0	0									876	0	0	0	0	0	0	0	0	0	0	0	0	0	0	0	0	0	0	0
	877	0	0	0	0	0	0	0	0	0	0	0	0	0	0	0	0	0	0	0	0									877	0	0	0	0	0	0	0	0	0	0	0	0	0	0	0	0	0	0	0
	878	0	0	0	0	0	0	0	0	0	0	0	0	0	0	0	0	0	0	0	0									878	0	0	0	0	0	0	0	0	0	0	0	0	0	0	0	0	0	0	0
	879	0	0	0	0	0	0	0	0	0	0	0	0	0	0	0	0	0	0	0	0									879	0	0	0	0	0	0	0	0	0	0	0	0	0	0	0	0	0	0	0
	880	0	0	0	0	0	0	0	0	0	0	0	0	0	0	0	0	0	0	0	0									880	0	0	0	0	0	0	0	0	0	0	0	0	0	0	0	0	0	0	0
	881	0	0	0	0	0	0	0	0	0	0	0	0	0	0	0	0	0	0	0	0									881	0	0	0	0	0	0	0	0	0	0	0	0	0	0	0	0	0	0	0
	882	0	0	0	0	0	0	0	0	0	0	0	0	0	0	0	0	0	0	0	0									882	0	0	0	0	0	0	0	0	0	0	0	0	0	0	0	0	0	0	0
	883	0	0	0	0	0	0	0	0	0	0	0	0	0	0	0	0	0	0	0	0									883	0	0	0	0	0	0	0	0	0	0	0	0	0	0	0	0	0	0	0
	884	0	0	0	0	0	0	0	0	0	0	0	0	0	0	0	0	0	0	0	0									884	0	0	0	0	0	0	0	0	0	0	0	0	0	0	0	0	0	0	0
	885	0	0	0	0	0	0	0	0	0	0	0	0	0	0	0	0	0	0	0	0									885	0	0	0	0	0	0	0	0	0	0	0	0	0	0	0	0	0	0	0
	886	0	0	0	0	0	0	0	0	0	0	0	0	0	0	0	0	0	0	0	0									886	0	0	0	0	0	0	0	0	0	0	0	0	0	0	0	0	0	0	0
	887	0	0	0	0	0	0	0	0	0	0	0	0	0	0	0	0	0	0	0	0									887	0	0	0	0	0	0	0	0	0	0	0	0	0	0	0	0	0	0	0
	888	0	0	0	0	0	0	0	0	0	0	0	0	0	0	0	0	0	0	0	0									888	0	0	0	0	0	0	0	0	0	0	0	0	0	0	0	0	0	0	0
	889	0	0	0	0	0	0	0	0	0	0	0	0	0	0	0	0	0	0	0	0									889	0	0	0	0	0	0	0	0	0	0	0	0	0	0	0	0	0	0	0
	890	0	0	0	0	0	0	0	0	0	0	0	0	0	0	0	0	0	0	0	0									890	0	0	0	0	0	0	0	0	0	0	0	0	0	0	0	0	0	0	0
	891	0	0	0	0	0	0	0	0	0	0	0	0	0	0	0	0	0	0	0	0									891	0	0	0	0	0	0	0	0	0	0	0	0	0	0	0	0	0	0	0
	892	0	0	0	0	0	0	0	0	0	0	0	0	0	0	0	0	0	0	0	0									892	0	0	0	0	0	0	0	0	0	0	0	0	0	0	0	0	0	0	0
	893	0	0	0	0	0	0	0	0	0	0	0	0	0	0	0	0	0	0	0	0									893	0	0	0	0	0	0	0	0	0	0	0	0	0	0	0	0	0	0	0
	894	0	0	0	0	0	0	0	0	0	0	0	0	0	0	0	0	0	0	0	0									894	0	0	0	0	0	0	0	0	0	0	0	0	0	0	0	0	0	0	0
	895	0	0	0	0	0	0	0	0	0	0	0	0	0	0	0	0	0	0	0	0									895	0	0	0	0	0	0	0	0	0	0	0	0	0	0	0	0	0	0	0
	896	0	0	0	0	0	0	0	0	0	0	0	0	0	0	0	0	0	0	0	0									896	0	0	0	0	0	0	0	0	0	0	0	0	0	0	0	0	0	0	0
	897	0	0	0	0	0	0	0	0	0	0	0	0	0	0	0	0	0	0	0	0									897	0	0	0	0	0	0	0	0	0	0	0	0	0	0	0	0	0	0	0
	898	0	0	0	0	0	0	0	0	0	0	0	0	0	0	0	0	0	0	0	0									898	0	0	0	0	0	0	0	0	0	0	0	0	0	0	0	0	0	0	0
	899	0	0	0	0	0	0	0	0	0	0	0	0	0	0	0	0	0	0	0	0									899	0	0	0	0	0	0	0	0	0	0	0	0	0	0	0	0	0	0	0
	900	0	0	0	0	0	0	0	0	0	0	0	0	0	0	0	0	0	0	0	0									900	0	0	0	0	0	0	0	0	0	0	0	0	0	0	0	0	0	0	0
	901	0	0	0	0	0	0	0	0	0	0	0	0	0	0	0	0	0	0	0	0									901	0	0	0	0	0	0	0	0	0	0	0	0	0	0	0	0	0	0	0
	902	0	0	0	0	0	0	0	0	0	0	0	0	0	0	0	0	0	0	0	0									902	0	0	0	0	0	0	0	0	0	0	0	0	0	0	0	0	0	0	0
	903	0	0	0	0	0	0	0	0	0	0	0	0	0	0	0	0	0	0	0	0									903	0	0	0	0	0	0	0	0	0	0	0	0	0	0	0	0	0	0	0
	904	0	0	0	0	0	0	0	0	0	0	0	0	0	0	0	0	0	0	0	0									904	0	0	0	0	0	0	0	0	0	0	0	0	0	0	0	0	0	0	0
	905	0	0	0	0	0	0	0	0	0	0	0	0	0	0	0	0	0	0	0	0									905	0	0	0	0	0	0	0	0	0	0	0	0	0	0	0	0	0	0	0
	906	0	0	0	0	0	0	0	0	0	0	0	0	0	0	0	0	0	0	0	0									906	0	0	0	0	0	0	0	0	0	0	0	0	0	0	0	0	0	0	0
	907	0	0	0	0	0	0	0	0	0	0	0	0	0	0	0	0	0	0	0	0									907	0	0	0	0	0	0	0	0	0	0	0	0	0	0	0	0	0	0	0
	908	0	0	0	0	0	0	0	0	0	0	0	0	0	0	0	0	0	0	0	0									908	0	0	0	0	0	0	0	0	0	0	0	0	0	0	0	0	0	0	0
	909	0	0	0	0	0	0	0	0	0	0	0	0	0	0	0	0	0	0	0	0									909	0	0	0	0	0	0	0	0	0	0	0	0	0	0	0	0	0	0	0
	910	0	0	0	0	0	0	0	0	0	0	0	0	0	0	0	0	0	0	0	0									910	0	0	0	0	0	0	0	0	0	0	0	0	0	0	0	0	0	0	0
	911	0	0	0	0	0	0	0	0	0	0	0	0	0	0	0	0	0	0	0	0									911	0	0	0	0	0	0	0	0	0	0	0	0	0	0	0	0	0	0	0
	912	0	0	0	0	0	0	0	0	0	0	0	0	0	0	0	0	0	0	0	0									912	0	0	0	0	0	0	0	0	0	0	0	0	0	0	0	0	0	0	0
	913	0	0	0	0	0	0	0	0	0	0	0	0	0	0	0	0	0	0	0	0									913	0	0	0	0	0	0	0	0	0	0	0	0	0	0	0	0	0	0	0
	914	0	0	0	0	0	0	0	0	0	0	0	0	0	0	0	0	0	0	0	0									914	0	0	0	0	0	0	0	0	0	0	0	0	0	0	0	0	0	0	0
	915	0	0	0	0	0	0	0	0	0	0	0	0	0	0	0	0	0	0	0	0									915	0	0	0	0	0	0	0	0	0	0	0	0	0	0	0	0	0	0	0
	916	0	0	0	0	0	0	0	0	0	0	0	0	0	0	0	0	0	0	0	0									916	0	0	0	0	0	0	0	0	0	0	0	0	0	0	0	0	0	0	0
	917	0	0	0	0	0	0	0	0	0	0	0	0	0	0	0	0	0	0	0	0									917	0	0	0	0	0	0	0	0	0	0	0	0	0	0	0	0	0	0	0
	918	0	0	0	0	0	0	0	0	0	0	0	0	0	0	0	0	0	0	0	0									918	0	0	0	0	0	0	0	0	0	0	0	0	0	0	0	0	0	0	0
	919	0	0	0	0	0	0	0	0	0	0	0	0	0	0	0	0	0	0	0	0									919	0	0	0	0	0	0	0	0	0	0	0	0	0	0	0	0	0	0	0
	920	0	0	0	0	0	0	0	0	0	0	0	0	0	0	0	0	0	0	0	0									920	0	0	0	0	0	0	0	0	0	0	0	0	0	0	0	0	0	0	0
	921	0	0	0	0	0	0	0	0	0	0	0	0	0	0	0	0	0	0	0	0									921	0	0	0	0	0	0	0	0	0	0	0	0	0	0	0	0	0	0	0
	922	0	0	0	0	0	0	0	0	0	0	0	0	0	0	0	0	0	0	0	0									922	0	0	0	0	0	0	0	0	0	0	0	0	0	0	0	0	0	0	0
	923	0	0	0	0	0	0	0	0	0	0	0	0	0	0	0	0	0	0	0	0									923	0	0	0	0	0	0	0	0	0	0	0	0	0	0	0	0	0	0	0
	924	0	0	0	0	0	0	0	0	0	0	0	0	0	0	0	0	0	0	0	0									924	0	0	0	0	0	0	0	0	0	0	0	0	0	0	0	0	0	0	0
	925	0	0	0	0	0	0	0	0	0	0	0	0	0	0	0	0	0	0	0	0									925	0	0	0	0	0	0	0	0	0	0	0	0	0	0	0	0	0	0	0
	926	0	0	0	0	0	0	0	0	0	0	0	0	0	0	0	0	0	0	0	0									926	0	0	0	0	0	0	0	0	0	0	0	0	0	0	0	0	0	0	0
	927	0	0	0	0	0	0	0	0	0	0	0	0	0	0	0	0	0	0	0	0									927	0	0	0	0	0	0	0	0	0	0	0	0	0	0	0	0	0	0	0
	928	0	0	0	0	0	0	0	0	0	0	0	0	0	0	0	0	0	0	0	0									928	0	0	0	0	0	0	0	0	0	0	0	0	0	0	0	0	0	0	0
	929	0	0	0	0	0	0	0	0	0	0	0	0	0	0	0	0	0	0	0	0									929	0	0	0	0	0	0	0	0	0	0	0	0	0	0	0	0	0	0	0
	930	0	0	0	0	0	0	0	0	0	0	0	0	0	0	0	0	0	0	0	0									930	0	0	0	0	0	0	0	0	0	0	0	0	0	0	0	0	0	0	0
	931	0	0	0	0	0	0	0	0	0	0	0	0	0	0	0	0	0	0	0	0									931	0	0	0	0	0	0	0	0	0	0	0	0	0	0	0	0	0	0	0
	932	0	0	0	0	0	0	0	0	0	0	0	0	0	0	0	0	0	0	0	0									932	0	0	0	0	0	0	0	0	0	0	0	0	0	0	0	0	0	0	0
	933	0	0	0	0	0	0	0	0	0	0	0	0	0	0	0	0	0	0	0	0									933	0	0	0	0	0	0	0	0	0	0	0	0	0	0	0	0	0	0	0
	934	0	0	0	0	0	0	0	0	0	0	0	0	0	0	0	0	0	0	0	0									934	0	0	0	0	0	0	0	0	0	0	0	0	0	0	0	0	0	0	0
	935	0	0	0	0	0	0	0	0	0	0	0	0	0	0	0	0	0	0	0	0									935	0	0	0	0	0	0	0	0	0	0	0	0	0	0	0	0	0	0	0
	936	0	0	0	0	0	0	0	0	0	0	0	0	0	0	0	0	0	0	0	0									936	0	0	0	0	0	0	0	0	0	0	0	0	0	0	0	0	0	0	0
	937	0	0	0	0	0	0	0	0	0	0	0	0	0	0	0	0	0	0	0	0									937	0	0	0	0	0	0	0	0	0	0	0	0	0	0	0	0	0	0	0
	938	0	0	0	0	0	0	0	0	0	0	0	0	0	0	0	0	0	0	0	0									938	0	0	0	0	0	0	0	0	0	0	0	0	0	0	0	0	0	0	0
	939	0	0	0	0	0	0	0	0	0	0	0	0	0	0	0	0	0	0	0	0									939	0	0	0	0	0	0	0	0	0	0	0	0	0	0	0	0	0	0	0
	940	0	0	0	0	0	0	0	0	0	0	0	0	0	0	0	0	0	0	0	0									940	0	0	0	0	0	0	0	0	0	0	0	0	0	0	0	0	0	0	0
	941	0	0	0	0	0	0	0	0	0	0	0	0	0	0	0	0	0	0	0	0									941	0	0	0	0	0	0	0	0	0	0	0	0	0	0	0	0	0	0	0
	942	0	0	0	0	0	0	0	0	0	0	0	0	0	0	0	0	0	0	0	0									942	0	0	0	0	0	0	0	0	0	0	0	0	0	0	0	0	0	0	0
	943	0	0	0	0	0	0	0	0	0	0	0	0	0	0	0	0	0	0	0	0									943	0	0	0	0	0	0	0	0	0	0	0	0	0	0	0	0	0	0	0
	944	0	0	0	0	0	0	0	0	0	0	0	0	0	0	0	0	0	0	0	0									944	0	0	0	0	0	0	0	0	0	0	0	0	0	0	0	0	0	0	0
	945	0	0	0	0	0	0	0	0	0	0	0	0	0	0	0	0	0	0	0	0									945	0	0	0	0	0	0	0	0	0	0	0	0	0	0	0	0	0	0	0
	946	0	0	0	0	0	0	0	0	0	0	0	0	0	0	0	0	0	0	0	0									946	0	0	0	0	0	0	0	0	0	0	0	0	0	0	0	0	0	0	0
	947	0	0	0	0	0	0	0	0	0	0	0	0	0	0	0	0	0	0	0	0									947	0	0	0	0	0	0	0	0	0	0	0	0	0	0	0	0	0	0	0
	948	0	0	0	0	0	0	0	0	0	0	0	0	0	0	0	0	0	0	0	0									948	0	0	0	0	0	0	0	0	0	0	0	0	0	0	0	0	0	0	0
	949	0	0	0	0	0	0	0	0	0	0	0	0	0	0	0	0	0	0	0	0									949	0	0	0	0	0	0	0	0	0	0	0	0	0	0	0	0	0	0	0
	950	0	0	0	0	0	0	0	0	0	0	0	0	0	0	0	0	0	0	0	0									950	0	0	0	0	0	0	0	0	0	0	0	0	0	0	0	0	0	0	0
	951	0	0	0	0	0	0	0	0	0	0	0	0	0	0	0	0	0	0	0	0									951	0	0	0	0	0	0	0	0	0	0	0	0	0	0	0	0	0	0	0
	952	0	0	0	0	0	0	0	0	0	0	0	0	0	0	0	0	0	0	0	0									952	0	0	0	0	0	0	0	0	0	0	0	0	0	0	0	0	0	0	0
	953	0	0	0	0	0	0	0	0	0	0	0	0	0	0	0	0	0	0	0	0									953	0	0	0	0	0	0	0	0	0	0	0	0	0	0	0	0	0	0	0
	954	0	0	0	0	0	0	0	0	0	0	0	0	0	0	0	0	0	0	0	0									954	0	0	0	0	0	0	0	0	0	0	0	0	0	0	0	0	0	0	0
	955	0	0	0	0	0	0	0	0	0	0	0	0	0	0	0	0	0	0	0	0									955	0	0	0	0	0	0	0	0	0	0	0	0	0	0	0	0	0	0	0
	956	0	0	0	0	0	0	0	0	0	0	0	0	0	0	0	0	0	0	0	0									956	0	0	0	0	0	0	0	0	0	0	0	0	0	0	0	0	0	0	0
	957	0	0	0	0	0	0	0	0	0	0	0	0	0	0	0	0	0	0	0	0									957	0	0	0	0	0	0	0	0	0	0	0	0	0	0	0	0	0	0	0
	958	0	0	0	0	0	0	0	0	0	0	0	0	0	0	0	0	0	0	0	0									958	0	0	0	0	0	0	0	0	0	0	0	0	0	0	0	0	0	0	0
	959	0	0	0	0	0	0	0	0	0	0	0	0	0	0	0	0	0	0	0	0									959	0	0	0	0	0	0	0	0	0	0	0	0	0	0	0	0	0	0	0
	960	0	0	0	0	0	0	0	0	0	0	0	0	0	0	0	0	0	0	0	0									960	0	0	0	0	0	0	0	0	0	0	0	0	0	0	0	0	0	0	0
	961	0	0	0	0	0	0	0	0	0	0	0	0	0	0	0	0	0	0	0	0									961	0	0	0	0	0	0	0	0	0	0	0	0	0	0	0	0	0	0	0
	962	0	0	0	0	0	0	0	0	0	0	0	0	0	0	0	0	0	0	0	0									962	0	0	0	0	0	0	0	0	0	0	0	0	0	0	0	0	0	0	0
	963	0	0	0	0	0	0	0	0	0	0	0	0	0	0	0	0	0	0	0	0									963	0	0	0	0	0	0	0	0	0	0	0	0	0	0	0	0	0	0	0
	964	0	0	0	0	0	0	0	0	0	0	0	0	0	0	0	0	0	0	0	0									964	0	0	0	0	0	0	0	0	0	0	0	0	0	0	0	0	0	0	0
	965	0	0	0	0	0	0	0	0	0	0	0	0	0	0	0	0	0	0	0	0									965	0	0	0	0	0	0	0	0	0	0	0	0	0	0	0	0	0	0	0
	966	0	0	0	0	0	0	0	0	0	0	0	0	0	0	0	0	0	0	0	0									966	0	0	0	0	0	0	0	0	0	0	0	0	0	0	0	0	0	0	0
	967	0	0	0	0	0	0	0	0	0	0	0	0	0	0	0	0	0	0	0	0									967	0	0	0	0	0	0	0	0	0	0	0	0	0	0	0	0	0	0	0
	968	0	0	0	0	0	0	0	0	0	0	0	0	0	0	0	0	0	0	0	0									968	0	0	0	0	0	0	0	0	0	0	0	0	0	0	0	0	0	0	0
	969	0	0	0	0	0	0	0	0	0	0	0	0	0	0	0	0	0	0	0	0									969	0	0	0	0	0	0	0	0	0	0	0	0	0	0	0	0	0	0	0
	970	0	0	0	0	0	0	0	0	0	0	0	0	0	0	0	0	0	0	0	0									970	0	0	0	0	0	0	0	0	0	0	0	0	0	0	0	0	0	0	0
	971	0	0	0	0	0	0	0	0	0	0	0	0	0	0	0	0	0	0	0	0									971	0	0	0	0	0	0	0	0	0	0	0	0	0	0	0	0	0	0	0
	972	0	0	0	0	0	0	0	0	0	0	0	0	0	0	0	0	0	0	0	0									972	0	0	0	0	0	0	0	0	0	0	0	0	0	0	0	0	0	0	0
	973	0	0	0	0	0	0	0	0	0	0	0	0	0	0	0	0	0	0	0	0									973	0	0	0	0	0	0	0	0	0	0	0	0	0	0	0	0	0	0	0
	974	0	0	0	0	0	0	0	0	0	0	0	0	0	0	0	0	0	0	0	0									974	0	0	0	0	0	0	0	0	0	0	0	0	0	0	0	0	0	0	0
	975	0	0	0	0	0	0	0	0	0	0	0	0	0	0	0	0	0	0	0	0									975	0	0	0	0	0	0	0	0	0	0	0	0	0	0	0	0	0	0	0
	976	0	0	0	0	0	0	0	0	0	0	0	0	0	0	0	0	0	0	0	0									976	0	0	0	0	0	0	0	0	0	0	0	0	0	0	0	0	0	0	0
	977	0	0	0	0	0	0	0	0	0	0	0	0	0	0	0	0	0	0	0	0									977	0	0	0	0	0	0	0	0	0	0	0	0	0	0	0	0	0	0	0
	978	0	0	0	0	0	0	0	0	0	0	0	0	0	0	0	0	0	0	0	0									978	0	0	0	0	0	0	0	0	0	0	0	0	0	0	0	0	0	0	0
	979	0	0	0	0	0	0	0	0	0	0	0	0	0	0	0	0	0	0	0	0									979	0	0	0	0	0	0	0	0	0	0	0	0	0	0	0	0	0	0	0
	980	0	0	0	0	0	0	0	0	0	0	0	0	0	0	0	0	0	0	0	0									980	0	0	0	0	0	0	0	0	0	0	0	0	0	0	0	0	0	0	0
	981	0	0	0	0	0	0	0	0	0	0	0	0	0	0	0	0	0	0	0	0									981	0	0	0	0	0	0	0	0	0	0	0	0	0	0	0	0	0	0	0
	982	0	0	0	0	0	0	0	0	0	0	0	0	0	0	0	0	0	0	0	0									982	0	0	0	0	0	0	0	0	0	0	0	0	0	0	0	0	0	0	0
	983	0	0	0	0	0	0	0	0	0	0	0	0	0	0	0	0	0	0	0	0									983	0	0	0	0	0	0	0	0	0	0	0	0	0	0	0	0	0	0	0
	984	0	0	0	0	0	0	0	0	0	0	0	0	0	0	0	0	0	0	0	0									984	0	0	0	0	0	0	0	0	0	0	0	0	0	0	0	0	0	0	0
	985	0	0	0	0	0	0	0	0	0	0	0	0	0	0	0	0	0	0	0	0									985	0	0	0	0	0	0	0	0	0	0	0	0	0	0	0	0	0	0	0
	986	0	0	0	0	0	0	0	0	0	0	0	0	0	0	0	0	0	0	0	0									986	0	0	0	0	0	0	0	0	0	0	0	0	0	0	0	0	0	0	0
	987	0	0	0	0	0	0	0	0	0	0	0	0	0	0	0	0	0	0	0	0									987	0	0	0	0	0	0	0	0	0	0	0	0	0	0	0	0	0	0	0
	988	0	0	0	0	0	0	0	0	0	0	0	0	0	0	0	0	0	0	0	0									988	0	0	0	0	0	0	0	0	0	0	0	0	0	0	0	0	0	0	0
	989	0	0	0	0	0	0	0	0	0	0	0	0	0	0	0	0	0	0	0	0									989	0	0	0	0	0	0	0	0	0	0	0	0	0	0	0	0	0	0	0
	990	0	0	0	0	0	0	0	0	0	0	0	0	0	0	0	0	0	0	0	0									990	0	0	0	0	0	0	0	0	0	0	0	0	0	0	0	0	0	0	0
	991	0	0	0	0	0	0	0	0	0	0	0	0	0	0	0	0	0	0	0	0									991	0	0	0	0	0	0	0	0	0	0	0	0	0	0	0	0	0	0	0
	992	0	0	0	0	0	0	0	0	0	0	0	0	0	0	0	0	0	0	0	0									992	0	0	0	0	0	0	0	0	0	0	0	0	0	0	0	0	0	0	0
	993	0	0	0	0	0	0	0	0	0	0	0	0	0	0	0	0	0	0	0	0									993	0	0	0	0	0	0	0	0	0	0	0	0	0	0	0	0	0	0	0
	994	0	0	0	0	0	0	0	0	0	0	0	0	0	0	0	0	0	0	0	0									994	0	0	0	0	0	0	0	0	0	0	0	0	0	0	0	0	0	0	0
	995	0	0	0	0	0	0	0	0	0	0	0	0	0	0	0	0	0	0	0	0									995	0	0	0	0	0	0	0	0	0	0	0	0	0	0	0	0	0	0	0
	996	0	0	0	0	0	0	0	0	0	0	0	0	0	0	0	0	0	0	0	0									996	0	0	0	0	0	0	0	0	0	0	0	0	0	0	0	0	0	0	0
	997	0	0	0	0	0	0	0	0	0	0	0	0	0	0	0	0	0	0	0	0									997	0	0	0	0	0	0	0	0	0	0	0	0	0	0	0	0	0	0	0
	998	0	0	0	0	0	0	0	0	0	0	0	0	0	0	0	0	0	0	0	0									998	0	0	0	0	0	0	0	0	0	0	0	0	0	0	0	0	0	0	0
	999	0	0	0	0	0	0	0	0	0	0	0	0	0	0	0	0	0	0	0	0									999	0	0	0	0	0	0	0	0	0	0	0	0	0	0	0	0	0	0	0
	1000	0	0	0	0	0	0	0	0	0	0	0	0	0	0	0	0	0	0	0	0									1000	0	0	0	0	0	0	0	0	0	0	0	0	0	0	0	0	0	0	0
	1001	0	0	0	0	0	0	0	0	0	0	0	0	0	0	0	0	0	0	0	0									1001	0	0	0	0	0	0	0	0	0	0	0	0	0	0	0	0	0	0	0
	1002	0	0	0	0	0	0	0	0	0	0	0	0	0	0	0	0	0	0	0	0									1002	0	0	0	0	0	0	0	0	0	0	0	0	0	0	0	0	0	0	0
	1003	0	0	0	0	0	0	0	0	0	0	0	0	0	0	0	0	0	0	0	0									1003	0	0	0	0	0	0	0	0	0	0	0	0	0	0	0	0	0	0	0
	1004	0	0	0	0	0	0	0	0	0	0	0	0	0	0	0	0	0	0	0	0									1004	0	0	0	0	0	0	0	0	0	0	0	0	0	0	0	0	0	0	0
	1005	0	0	0	0	0	0	0	0	0	0	0	0	0	0	0	0	0	0	0	0									1005	0	0	0	0	0	0	0	0	0	0	0	0	0	0	0	0	0	0	0
	1006	0	0	0	0	0	0	0	0	0	0	0	0	0	0	0	0	0	0	0	0									1006	0	0	0	0	0	0	0	0	0	0	0	0	0	0	0	0	0	0	0
	1007	0	0	0	0	0	0	0	0	0	0	0	0	0	0	0	0	0	0	0	0									1007	0	0	0	0	0	0	0	0	0	0	0	0	0	0	0	0	0	0	0
	1008	0	0	0	0	0	0	0	0	0	0	0	0	0	0	0	0	0	0	0	0									1008	0	0	0	0	0	0	0	0	0	0	0	0	0	0	0	0	0	0	0
	1009	0	0	0	0	0	0	0	0	0	0	0	0	0	0	0	0	0	0	0	0									1009	0	0	0	0	0	0	0	0	0	0	0	0	0	0	0	0	0	0	0
	1010	0	0	0	0	0	0	0	0	0	0	0	0	0	0	0	0	0	0	0	0									1010	0	0	0	0	0	0	0	0	0	0	0	0	0	0	0	0	0	0	0
	1011	0	0	0	0	0	0	0	0	0	0	0	0	0	0	0	0	0	0	0	0									1011	0	0	0	0	0	0	0	0	0	0	0	0	0	0	0	0	0	0	0
	1012	0	0	0	0	0	0	0	0	0	0	0	0	0	0	0	0	0	0	0	0									1012	0	0	0	0	0	0	0	0	0	0	0	0	0	0	0	0	0	0	0
	1013	0	0	0	0	0	0	0	0	0	0	0	0	0	0	0	0	0	0	0	0									1013	0	0	0	0	0	0	0	0	0	0	0	0	0	0	0	0	0	0	0
	1014	0	0	0	0	0	0	0	0	0	0	0	0	0	0	0	0	0	0	0	0									1014	0	0	0	0	0	0	0	0	0	0	0	0	0	0	0	0	0	0	0
	1015	0	0	0	0	0	0	0	0	0	0	0	0	0	0	0	0	0	0	0	0									1015	0	0	0	0	0	0	0	0	0	0	0	0	0	0	0	0	0	0	0
	1016	0	0	0	0	0	0	0	0	0	0	0	0	0	0	0	0	0	0	0	0									1016	0	0	0	0	0	0	0	0	0	0	0	0	0	0	0	0	0	0	0
	1017	0	0	0	0	0	0	0	0	0	0	0	0	0	0	0	0	0	0	0	0									1017	0	0	0	0	0	0	0	0	0	0	0	0	0	0	0	0	0	0	0
	1018	0	0	0	0	0	0	0	0	0	0	0	0	0	0	0	0	0	0	0	0									1018	0	0	0	0	0	0	0	0	0	0	0	0	0	0	0	0	0	0	0
	1019	0	0	0	0	0	0	0	0	0	0	0	0	0	0	0	0	0	0	0	0									1019	0	0	0	0	0	0	0	0	0	0	0	0	0	0	0	0	0	0	0
	1020	0	0	0	0	0	0	0	0	0	0	0	0	0	0	0	0	0	0	0	0									1020	0	0	0	0	0	0	0	0	0	0	0	0	0	0	0	0	0	0	0
	1021	0	0	0	0	0	0	0	0	0	0	0	0	0	0	0	0	0	0	0	0									1021	0	0	0	0	0	0	0	0	0	0	0	0	0	0	0	0	0	0	0
	1022	0	0	0	0	0	0	0	0	0	0	0	0	0	0	0	0	0	0	0	0									1022	0	0	0	0	0	0	0	0	0	0	0	0	0	0	0	0	0	0	0
	1023	0	0	0	0	0	0	0	0	0	0	0	0	0	0	0	0	0	0	0	0									1023	0	0	0	0	0	0	0	0	0	0	0	0	0	0	0	0	0	0	0
	1024	0	0	0	0	0	0	0	0	0	0	0	0	0	0	0	0	0	0	0	0									1024	0	0	0	0	0	0	0	0	0	0	0	0	0	0	0	0	0	0	0
	1025	0	0	0	0	0	0	0	0	0	0	0	0	0	0	0	0	0	0	0	0									1025	0	0	0	0	0	0	0	0	0	0	0	0	0	0	0	0	0	0	0
	1026	0	0	0	0	0	0	0	0	0	0	0	0	0	0	0	0	0	0	0	0									1026	0	0	0	0	0	0	0	0	0	0	0	0	0	0	0	0	0	0	0
	1027	0	0	0	0	0	0	0	0	0	0	0	0	0	0	0	0	0	0	0	0									1027	0	0	0	0	0	0	0	0	0	0	0	0	0	0	0	0	0	0	0
	1028	0	0	0	0	0	0	0	0	0	0	0	0	0	0	0	0	0	0	0	0									1028	0	0	0	0	0	0	0	0	0	0	0	0	0	0	0	0	0	0	0
	1029	0	0	0	0	0	0	0	0	0	0	0	0	0	0	0	0	0	0	0	0									1029	0	0	0	0	0	0	0	0	0	0	0	0	0	0	0	0	0	0	0
	1030	0	0	0	0	0	0	0	0	0	0	0	0	0	0	0	0	0	0	0	0									1030	0	0	0	0	0	0	0	0	0	0	0	0	0	0	0	0	0	0	0
	1031	0	0	0	0	0	0	0	0	0	0	0	0	0	0	0	0	0	0	0	0									1031	0	0	0	0	0	0	0	0	0	0	0	0	0	0	0	0	0	0	0
	1032	0	0	0	0	0	0	0	0	0	0	0	0	0	0	0	0	0	0	0	0									1032	0	0	0	0	0	0	0	0	0	0	0	0	0	0	0	0	0	0	0
	1033	0	0	0	0	0	0	0	0	0	0	0	0	0	0	0	0	0	0	0	0									1033	0	0	0	0	0	0	0	0	0	0	0	0	0	0	0	0	0	0	0
	1034	0	0	0	0	0	0	0	0	0	0	0	0	0	0	0	0	0	0	0	0									1034	0	0	0	0	0	0	0	0	0	0	0	0	0	0	0	0	0	0	0
	1035	0	0	0	0	0	0	0	0	0	0	0	0	0	0	0	0	0	0	0	0									1035	0	0	0	0	0	0	0	0	0	0	0	0	0	0	0	0	0	0	0
	1036	0	0	0	0	0	0	0	0	0	0	0	0	0	0	0	0	0	0	0	0									1036	0	0	0	0	0	0	0	0	0	0	0	0	0	0	0	0	0	0	0
	1037	0	0	0	0	0	0	0	0	0	0	0	0	0	0	0	0	0	0	0	0									1037	0	0	0	0	0	0	0	0	0	0	0	0	0	0	0	0	0	0	0
	1038	0	0	0	0	0	0	0	0	0	0	0	0	0	0	0	0	0	0	0	0									1038	0	0	0	0	0	0	0	0	0	0	0	0	0	0	0	0	0	0	0
	1039	0	0	0	0	0	0	0	0	0	0	0	0	0	0	0	0	0	0	0	0									1039	0	0	0	0	0	0	0	0	0	0	0	0	0	0	0	0	0	0	0
	1040	0	0	0	0	0	0	0	0	0	0	0	0	0	0	0	0	0	0	0	0									1040	0	0	0	0	0	0	0	0	0	0	0	0	0	0	0	0	0	0	0
	1041	0	0	0	0	0	0	0	0	0	0	0	0	0	0	0	0	0	0	0	0									1041	0	0	0	0	0	0	0	0	0	0	0	0	0	0	0	0	0	0	0
	1042	0	0	0	0	0	0	0	0	0	0	0	0	0	0	0	0	0	0	0	0									1042	0	0	0	0	0	0	0	0	0	0	0	0	0	0	0	0	0	0	0
	1043	0	0	0	0	0	0	0	0	0	0	0	0	0	0	0	0	0	0	0	0									1043	0	0	0	0	0	0	0	0	0	0	0	0	0	0	0	0	0	0	0
	1044	0	0	0	0	0	0	0	0	0	0	0	0	0	0	0	0	0	0	0	0									1044	0	0	0	0	0	0	0	0	0	0	0	0	0	0	0	0	0	0	0
	1045	0	0	0	0	0	0	0	0	0	0	0	0	0	0	0	0	0	0	0	0									1045	0	0	0	0	0	0	0	0	0	0	0	0	0	0	0	0	0	0	0
	1046	0	0	0	0	0	0	0	0	0	0	0	0	0	0	0	0	0	0	0	0									1046	0	0	0	0	0	0	0	0	0	0	0	0	0	0	0	0	0	0	0
	1047	0	0	0	0	0	0	0	0	0	0	0	0	0	0	0	0	0	0	0	0									1047	0	0	0	0	0	0	0	0	0	0	0	0	0	0	0	0	0	0	0
	1048	0	0	0	0	0	0	0	0	0	0	0	0	0	0	0	0	0	0	0	0									1048	0	0	0	0	0	0	0	0	0	0	0	0	0	0	0	0	0	0	0
	1049	0	0	0	0	0	0	0	0	0	0	0	0	0	0	0	0	0	0	0	0									1049	0	0	0	0	0	0	0	0	0	0	0	0	0	0	0	0	0	0	0
	1050	0	0	0	0	0	0	0	0	0	0	0	0	0	0	0	0	0	0	0	0									1050	0	0	0	0	0	0	0	0	0	0	0	0	0	0	0	0	0	0	0
	1051	0	0	0	0	0	0	0	0	0	0	0	0	0	0	0	0	0	0	0	0									1051	0	0	0	0	0	0	0	0	0	0	0	0	0	0	0	0	0	0	0
	1052	0	0	0	0	0	0	0	0	0	0	0	0	0	0	0	0	0	0	0	0									1052	0	0	0	0	0	0	0	0	0	0	0	0	0	0	0	0	0	0	0
	1053	0	0	0	0	0	0	0	0	0	0	0	0	0	0	0	0	0	0	0	0									1053	0	0	0	0	0	0	0	0	0	0	0	0	0	0	0	0	0	0	0
	1054	0	0	0	0	0	0	0	0	0	0	0	0	0	0	0	0	0	0	0	0									1054	0	0	0	0	0	0	0	0	0	0	0	0	0	0	0	0	0	0	0
	1055	0	0	0	0	0	0	0	0	0	0	0	0	0	0	0	0	0	0	0	0									1055	0	0	0	0	0	0	0	0	0	0	0	0	0	0	0	0	0	0	0
	1056	0	0	0	0	0	0	0	0	0	0	0	0	0	0	0	0	0	0	0	0									1056	0	0	0	0	0	0	0	0	0	0	0	0	0	0	0	0	0	0	0
	1057	0	0	0	0	0	0	0	0	0	0	0	0	0	0	0	0	0	0	0	0									1057	0	0	0	0	0	0	0	0	0	0	0	0	0	0	0	0	0	0	0
	1058	0	0	0	0	0	0	0	0	0	0	0	0	0	0	0	0	0	0	0	0									1058	0	0	0	0	0	0	0	0	0	0	0	0	0	0	0	0	0	0	0
	1059	0	0	0	0	0	0	0	0	0	0	0	0	0	0	0	0	0	0	0	0									1059	0	0	0	0	0	0	0	0	0	0	0	0	0	0	0	0	0	0	0
	1060	0	0	0	0	0	0	0	0	0	0	0	0	0	0	0	0	0	0	0	0									1060	0	0	0	0	0	0	0	0	0	0	0	0	0	0	0	0	0	0	0
	1061	0	0	0	0	0	0	0	0	0	0	0	0	0	0	0	0	0	0	0	0									1061	0	0	0	0	0	0	0	0	0	0	0	0	0	0	0	0	0	0	0
	1062	0	0	0	0	0	0	0	0	0	0	0	0	0	0	0	0	0	0	0	0									1062	0	0	0	0	0	0	0	0	0	0	0	0	0	0	0	0	0	0	0
	1063	0	0	0	0	0	0	0	0	0	0	0	0	0	0	0	0	0	0	0	0									1063	0	0	0	0	0	0	0	0	0	0	0	0	0	0	0	0	0	0	0
	1064	0	0	0	0	0	0	0	0	0	0	0	0	0	0	0	0	0	0	0	0									1064	0	0	0	0	0	0	0	0	0	0	0	0	0	0	0	0	0	0	0
	1065	0	0	0	0	0	0	0	0	0	0	0	0	0	0	0	0	0	0	0	0									1065	0	0	0	0	0	0	0	0	0	0	0	0	0	0	0	0	0	0	0
	1066	0	0	0	0	0	0	0	0	0	0	0	0	0	0	0	0	0	0	0	0									1066	0	0	0	0	0	0	0	0	0	0	0	0	0	0	0	0	0	0	0
	1067	0	0	0	0	0	0	0	0	0	0	0	0	0	0	0	0	0	0	0	0									1067	0	0	0	0	0	0	0	0	0	0	0	0	0	0	0	0	0	0	0
	1068	0	0	0	0	0	0	0	0	0	0	0	0	0	0	0	0	0	0	0	0									1068	0	0	0	0	0	0	0	0	0	0	0	0	0	0	0	0	0	0	0
	1069	0	0	0	0	0	0	0	0	0	0	0	0	0	0	0	0	0	0	0	0									1069	0	0	0	0	0	0	0	0	0	0	0	0	0	0	0	0	0	0	0
	1070	0	0	0	0	0	0	0	0	0	0	0	0	0	0	0	0	0	0	0	0
	1071	0	0	0	0	0	0	0	0	0	0	0	0	0	0	0	0	0	0	0	0
	1072	0	0	0	0	0	0	0	0	0	0	0	0	0	0	0	0	0	0	0	0
	1073	0	0	0	0	0	0	0	0	0	0	0	0	0	0	0	0	0	0	0	0
	1074	0	0	0	0	0	0	0	0	0	0	0	0	0	0	0	0	0	0	0	0
	1075	0	0	0	0	0	0	0	0	0	0	0	0	0	0	0	0	0	0	0	0
	1076	0	0	0	0	0	0	0	0	0	0	0	0	0	0	0	0	0	0	0	0
	1077	0	0	0	0	0	0	0	0	0	0	0	0	0	0	0	0	0	0	0	0
	1078	0	0	0	0	0	0	0	0	0	0	0	0	0	0	0	0	0	0	0	0
	1079	0	0	0	0	0	0	0	0	0	0	0	0	0	0	0	0	0	0	0	0
	1080	0	0	0	0	0	0	0	0	0	0	0	0	0	0	0	0	0	0	0	0
	1081	0	0	0	0	0	0	0	0	0	0	0	0	0	0	0	0	0	0	0	0
	1082	0	0	0	0	0	0	0	0	0	0	0	0	0	0	0	0	0	0	0	0
	1083	0	0	0	0	0	0	0	0	0	0	0	0	0	0	0	0	0	0	0	0
	1084	0	0	0	0	0	0	0	0	0	0	0	0	0	0	0	0	0	0	0	0
	1085	0	0	0	0	0	0	0	0	0	0	0	0	0	0	0	0	0	0	0	0
	1086	0	0	0	0	0	0	0	0	0	0	0	0	0	0	0	0	0	0	0	0
	1087	0	0	0	0	0	0	0	0	0	0	0	0	0	0	0	0	0	0	0	0
	1088	0	0	0	0	0	0	0	0	0	0	0	0	0	0	0	0	0	0	0	0
	1089	0	0	0	0	0	0	0	0	0	0	0	0	0	0	0	0	0	0	0	0
	1090	0	0	0	0	0	0	0	0	0	0	0	0	0	0	0	0	0	0	0	0
	1091	0	0	0	0	0	0	0	0	0	0	0	0	0	0	0	0	0	0	0	0
	1092	0	0	0	0	0	0	0	0	0	0	0	0	0	0	0	0	0	0	0	0
	1093	0	0	0	0	0	0	0	0	0	0	0	0	0	0	0	0	0	0	0	0
	1094	0	0	0	0	0	0	0	0	0	0	0	0	0	0	0	0	0	0	0	0
	1095	0	0	0	0	0	0	0	0	0	0	0	0	0	0	0	0	0	0	0	0
	1096	0	0	0	0	0	0	0	0	0	0	0	0	0	0	0	0	0	0	0	0
	1097	0	0	0	0	0	0	0	0	0	0	0	0	0	0	0	0	0	0	0	0
	1098	0	0	0	0	0	0	0	0	0	0	0	0	0	0	0	0	0	0	0	0
	1099	0	0	0	0	0	0	0	0	0	0	0	0	0	0	0	0	0	0	0	0
	1100	0	0	0	0	0	0	0	0	0	0	0	0	0	0	0	0	0	0	0	0
	1101	0	0	0	0	0	0	0	0	0	0	0	0	0	0	0	0	0	0	0	0
	1102	0	0	0	0	0	0	0	0	0	0	0	0	0	0	0	0	0	0	0	0
	1103	0	0	0	0	0	0	0	0	0	0	0	0	0	0	0	0	0	0	0	0
	1104	0	0	0	0	0	0	0	0	0	0	0	0	0	0	0	0	0	0	0	0
	1105	0	0	0	0	0	0	0	0	0	0	0	0	0	0	0	0	0	0	0	0
	1106	0	0	0	0	0	0	0	0	0	0	0	0	0	0	0	0	0	0	0	0
	1107	0	0	0	0	0	0	0	0	0	0	0	0	0	0	0	0	0	0	0	0
	1108	0	0	0	0	0	0	0	0	0	0	0	0	0	0	0	0	0	0	0	0
	1109	0	0	0	0	0	0	0	0	0	0	0	0	0	0	0	0	0	0	0	0
	1110	0	0	0	0	0	0	0	0	0	0	0	0	0	0	0	0	0	0	0	0
	1111	0	0	0	0	0	0	0	0	0	0	0	0	0	0	0	0	0	0	0	0
	1112	0	0	0	0	0	0	0	0	0	0	0	0	0	0	0	0	0	0	0	0
	1113	0	0	0	0	0	0	0	0	0	0	0	0	0	0	0	0	0	0	0	0
	1114	0	0	0	0	0	0	0	0	0	0	0	0	0	0	0	0	0	0	0	0
	1115	0	0	0	0	0	0	0	0	0	0	0	0	0	0	0	0	0	0	0	0
	1116	0	0	0	0	0	0	0	0	0	0	0	0	0	0	0	0	0	0	0	0
	1117	0	0	0	0	0	0	0	0	0	0	0	0	0	0	0	0	0	0	0	0
	1118	0	0	0	0	0	0	0	0	0	0	0	0	0	0	0	0	0	0	0	0
	1119	0	0	0	0	0	0	0	0	0	0	0	0	0	0	0	0	0	0	0	0
	1120	0	0	0	0	0	0	0	0	0	0	0	0	0	0	0	0	0	0	0	0
	1121	0	0	0	0	0	0	0	0	0	0	0	0	0	0	0	0	0	0	0	0
	1122	0	0	0	0	0	0	0	0	0	0	0	0	0	0	0	0	0	0	0	0
	1123	0	0	0	0	0	0	0	0	0	0	0	0	0	0	0	0	0	0	0	0
	1124	0	0	0	0	0	0	0	0	0	0	0	0	0	0	0	0	0	0	0	0
	1125	0	0	0	0	0	0	0	0	0	0	0	0	0	0	0	0	0	0	0	0
	1126	0	0	0	0	0	0	0	0	0	0	0	0	0	0	0	0	0	0	0	0
	1127	0	0	0	0	0	0	0	0	0	0	0	0	0	0	0	0	0	0	0	0
	1128	0	0	0	0	0	0	0	0	0	0	0	0	0	0	0	0	0	0	0	0
	1129	0	0	0	0	0	0	0	0	0	0	0	0	0	0	0	0	0	0	0	0
	1130	0	0	0	0	0	0	0	0	0	0	0	0	0	0	0	0	0	0	0	0
	1131	0	0	0	0	0	0	0	0	0	0	0	0	0	0	0	0	0	0	0	0
	1132	0	0	0	0	0	0	0	0	0	0	0	0	0	0	0	0	0	0	0	0
	1133	0	0	0	0	0	0	0	0	0	0	0	0	0	0	0	0	0	0	0	0
	1134	0	0	0	0	0	0	0	0	0	0	0	0	0	0	0	0	0	0	0	0
	1135	0	0	0	0	0	0	0	0	0	0	0	0	0	0	0	0	0	0	0	0
	1136	0	0	0	0	0	0	0	0	0	0	0	0	0	0	0	0	0	0	0	0
	1137	0	0	0	0	0	0	0	0	0	0	0	0	0	0	0	0	0	0	0	0
	1138	0	0	0	0	0	0	0	0	0	0	0	0	0	0	0	0	0	0	0	0
	1139	0	0	0	0	0	0	0	0	0	0	0	0	0	0	0	0	0	0	0	0
	1140	0	0	0	0	0	0	0	0	0	0	0	0	0	0	0	0	0	0	0	0
	1141	0	0	0	0	0	0	0	0	0	0	0	0	0	0	0	0	0	0	0	0
	1142	0	0	0	0	0	0	0	0	0	0	0	0	0	0	0	0	0	0	0	0
	1143	0	0	0	0	0	0	0	0	0	0	0	0	0	0	0	0	0	0	0	0
	1144	0	0	0	0	0	0	0	0	0	0	0	0	0	0	0	0	0	0	0	0
	1145	0	0	0	0	0	0	0	0	0	0	0	0	0	0	0	0	0	0	0	0
	1146	0	0	0	0	0	0	0	0	0	0	0	0	0	0	0	0	0	0	0	0
	1147	0	0	0	0	0	0	0	0	0	0	0	0	0	0	0	0	0	0	0	0
	1148	0	0	0	0	0	0	0	0	0	0	0	0	0	0	0	0	0	0	0	0
	1149	0	0	0	0	0	0	0	0	0	0	0	0	0	0	0	0	0	0	0	0
	1150	0	0	0	0	0	0	0	0	0	0	0	0	0	0	0	0	0	0	0	0
	1151	0	0	0	0	0	0	0	0	0	0	0	0	0	0	0	0	0	0	0	0
	1152	0	0	0	0	0	0	0	0	0	0	0	0	0	0	0	0	0	0	0	0
	1153	0	0	0	0	0	0	0	0	0	0	0	0	0	0	0	0	0	0	0	0
	1154	0	0	0	0	0	0	0	0	0	0	0	0	0	0	0	0	0	0	0	0
	1155	0	0	0	0	0	0	0	0	0	0	0	0	0	0	0	0	0	0	0	0
	1156	0	0	0	0	0	0	0	0	0	0	0	0	0	0	0	0	0	0	0	0
	1157	0	0	0	0	0	0	0	0	0	0	0	0	0	0	0	0	0	0	0	0
	1158	0	0	0	0	0	0	0	0	0	0	0	0	0	0	0	0	0	0	0	0
	1159	0	0	0	0	0	0	0	0	0	0	0	0	0	0	0	0	0	0	0	0
	1160	0	0	0	0	0	0	0	0	0	0	0	0	0	0	0	0	0	0	0	0
	1161	0	0	0	0	0	0	0	0	0	0	0	0	0	0	0	0	0	0	0	0
	1162	0	0	0	0	0	0	0	0	0	0	0	0	0	0	0	0	0	0	0	0
	1163	0	0	0	0	0	0	0	0	0	0	0	0	0	0	0	0	0	0	0	0
	1164	0	0	0	0	0	0	0	0	0	0	0	0	0	0	0	0	0	0	0	0
	1165	0	0	0	0	0	0	0	0	0	0	0	0	0	0	0	0	0	0	0	0
	1166	0	0	0	0	0	0	0	0	0	0	0	0	0	0	0	0	0	0	0	0
	1167	0	0	0	0	0	0	0	0	0	0	0	0	0	0	0	0	0	0	0	0
	1168	0	0	0	0	0	0	0	0	0	0	0	0	0	0	0	0	0	0	0	0
	1169	0	0	0	0	0	0	0	0	0	0	0	0	0	0	0	0	0	0	0	0
	1170	0	0	0	0	0	0	0	0	0	0	0	0	0	0	0	0	0	0	0	0
	1171	0	0	0	0	0	0	0	0	0	0	0	0	0	0	0	0	0	0	0	0
	1172	0	0	0	0	0	0	0	0	0	0	0	0	0	0	0	0	0	0	0	0
	1173	0	0	0	0	0	0	0	0	0	0	0	0	0	0	0	0	0	0	0	0
	1174	0	0	0	0	0	0	0	0	0	0	0	0	0	0	0	0	0	0	0	0
	1175	0	0	0	0	0	0	0	0	0	0	0	0	0	0	0	0	0	0	0	0
	1176	0	0	0	0	0	0	0	0	0	0	0	0	0	0	0	0	0	0	0	0
	1177	0	0	0	0	0	0	0	0	0	0	0	0	0	0	0	0	0	0	0	0
	1178	0	0	0	0	0	0	0	0	0	0	0	0	0	0	0	0	0	0	0	0
	1179	0	0	0	0	0	0	0	0	0	0	0	0	0	0	0	0	0	0	0	0
	1180	0	0	0	0	0	0	0	0	0	0	0	0	0	0	0	0	0	0	0	0
	1181	0	0	0	0	0	0	0	0	0	0	0	0	0	0	0	0	0	0	0	0
	1182	0	0	0	0	0	0	0	0	0	0	0	0	0	0	0	0	0	0	0	0
	1183	0	0	0	0	0	0	0	0	0	0	0	0	0	0	0	0	0	0	0	0
	1184	0	0	0	0	0	0	0	0	0	0	0	0	0	0	0	0	0	0	0	0
	1185	0	0	0	0	0	0	0	0	0	0	0	0	0	0	0	0	0	0	0	0
	1186	0	0	0	0	0	0	0	0	0	0	0	0	0	0	0	0	0	0	0	0
	1187	0	0	0	0	0	0	0	0	0	0	0	0	0	0	0	0	0	0	0	0
	1188	0	0	0	0	0	0	0	0	0	0	0	0	0	0	0	0	0	0	0	0
	1189	0	0	0	0	0	0	0	0	0	0	0	0	0	0	0	0	0	0	0	0
	1190	0	0	0	0	0	0	0	0	0	0	0	0	0	0	0	0	0	0	0	0
	1191	0	0	0	0	0	0	0	0	0	0	0	0	0	0	0	0	0	0	0	0
	1192	0	0	0	0	0	0	0	0	0	0	0	0	0	0	0	0	0	0	0	0
	1193	0	0	0	0	0	0	0	0	0	0	0	0	0	0	0	0	0	0	0	0
	1194	0	0	0	0	0	0	0	0	0	0	0	0	0	0	0	0	0	0	0	0
	1195	0	0	0	0	0	0	0	0	0	0	0	0	0	0	0	0	0	0	0	0
	1196	0	0	0	0	0	0	0	0	0	0	0	0	0	0	0	0	0	0	0	0
	1197	0	0	0	0	0	0	0	0	0	0	0	0	0	0	0	0	0	0	0	0
	1198	0	0	0	0	0	0	0	0	0	0	0	0	0	0	0	0	0	0	0	0
	1199	0	0	0	0	0	0	0	0	0	0	0	0	0	0	0	0	0	0	0	0
	1200	0	0	0	0	0	0	0	0	0	0	0	0	0	0	0	0	0	0	0	0
	1201	0	0	0	0	0	0	0	0	0	0	0	0	0	0	0	0	0	0	0	0
	1202	0	0	0	0	0	0	0	0	0	0	0	0	0	0	0	0	0	0	0	0
	1203	0	0	0	0	0	0	0	0	0	0	0	0	0	0	0	0	0	0	0	0
	1204	0	0	0	0	0	0	0	0	0	0	0	0	0	0	0	0	0	0	0	0
	1205	0	0	0	0	0	0	0	0	0	0	0	0	0	0	0	0	0	0	0	0
	1206	0	0	0	0	0	0	0	0	0	0	0	0	0	0	0	0	0	0	0	0
	1207	0	0	0	0	0	0	0	0	0	0	0	0	0	0	0	0	0	0	0	0
	1208	0	0	0	0	0	0	0	0	0	0	0	0	0	0	0	0	0	0	0	0
	1209	0	0	0	0	0	0	0	0	0	0	0	0	0	0	0	0	0	0	0	0
	1210	0	0	0	0	0	0	0	0	0	0	0	0	0	0	0	0	0	0	0	0
	1211	0	0	0	0	0	0	0	0	0	0	0	0	0	0	0	0	0	0	0	0
	1212	0	0	0	0	0	0	0	0	0	0	0	0	0	0	0	0	0	0	0	0
	1213	0	0	0	0	0	0	0	0	0	0	0	0	0	0	0	0	0	0	0	0										0	0	0	0	0	0	0	0	0	0	0	0	0	0	0	0	0	0	0
	1214	0	0	0	0	0	0	0	0	0	0	0	0	0	0	0	0	0	0	0	0										0	0	0	0	0	0	0	0	0	0	0	0	0	0	0	0	0	0	0
	1215	0	0	0	0	0	0	0	0	0	0	0	0	0	0	0	0	0	0	0	0										0	0	0	0	0	0	0	0	0	0	0	0	0	0	0	0	0	0	0
	1216	0	0	0	0	0	0	0	0	0	0	0	0	0	0	0	0	0	0	0	0										0	0	0	0	0	0	0	0	0	0	0	0	0	0	0	0	0	0	0
	1217	0	0	0	0	0	0	0	0	0	0	0	0	0	0	0	0	0	0	0	0										0	0	0	0	0	0	0	0	0	0	0	0	0	0	0	0	0	0	0
																															0	0	0	0	0	0	0	0	0	0	0	0	0	0	0	0	0	0	0
SUM	609	-600	-1348	-2232	-89.9915	-90.0085	0	0	0	0	0	0	0	0	0	0	0	0	0	0	0									571915	-5750	-12614	-20726	-1069.92	-1070.08	0	0	0	0	0	0	0	0	0	0	0	0	0	0
CN X SUM OF ELEM.		-6600	-14828	-24552	-989.906	-990.094	0	0	0	0	0	0	0	0	0	0	0	0	0	0	0
		7	8	9	10	11	12	13	14	15	16	17	18	19	20	21	22	23	24	25	26
	SC	1.14783	1.17552	1.1846	0.925214	0.925254	#DIV/0!	#DIV/0!	#DIV/0!	#DIV/0!	#DIV/0!	#DIV/0!	#DIV/0!	#DIV/0!	#DIV/0!	#DIV/0!	#DIV/0!	#DIV/0!	#DIV/0!	#DIV/0!	#DIV/0!
[truncated: 3 more columns]

## Sheet: 03
	OPTINALYSIS: SEQUENCE ANALYSIS THROUGH A LOOKING-GLASS
	CN = Central node; Kc = Kabirian coefficient of similarity; %Sim. = Percentage similarity; %Dsim. = Percentage dissimilarity																NUM. = Numeration; DEN. = Denumeration
				For Kc >1		For Kc <1
	RESULTS	CN	Kc	%Sim.	%Dsim.	%Sim.	%Dsim.										NUM	DEN		NUM	DEN
	Seq. 1A	13	1.07586	75.2809	24.7191	132.836	-32.8358										92.4138	1.22759		-122.759	-0.924138
	Seq. 1B	13	1	100	0	100	0										100	1		-100	-1
	Seq. 1C	13	1.04874	82.9912	17.0088	120.495	-20.4947										95.1261	1.14622		-114.622	-0.951261
	Seq. 1D	13	1.02632	90.2439	9.7561	110.811	-10.8108										97.3684	1.07895		-107.895	-0.973684
	Seq. 1E	13	1.02035	92.3288	7.67123	108.309	-8.30861										97.9651	1.06105		-106.105	-0.979651
	Seq. 1F	13	1.06979	76.9161	23.0839	130.012	-30.0118										93.0207	1.20938		-120.938	-0.930207
	Seq. 1G	13	1.05584	80.8692	19.1308	123.656	-23.6564										94.4161	1.16752		-116.752	-0.944161
	Seq. 1H	13	1.07925	74.3902	25.6098	134.426	-34.4262										92.0755	1.23774		-123.774	-0.920755
	Seq. 1I	13	1.06849	77.2727	22.7273	129.412	-29.4118										93.1507	1.20548		-120.548	-0.931507
	Seq. 1J	11	1	100	0	100	0										100	1		-100	-1
	Seq. 1K	11	1.03937	85.9155	14.0845	116.393	-16.3934										96.063	1.11811		-111.811	-0.96063
	Seq. 1L	11	1.07317	76	24	131.579	-31.5789										92.6829	1.21951		-121.951	-0.926829
	Seq. 1M	11	1.11144	66.5924	33.4076	150.167	-50.1672										88.8559	1.33432		-133.432	-0.888559
	Seq. 1N	11	1.12084	64.5254	35.4746	154.978	-54.9777										87.9164	1.36251		-136.251	-0.879164
	Seq. 1O	11	1.12377	63.8968	36.1032	156.502	-56.5022										87.6228	1.37132		-137.132	-0.876228
	Seq. 1P	11	0.999986	100.006	-0.00568269	99.9943	0.00568237										100.001	0.999957		-99.9957	-1.00001
	Seq. 1Q	11	1.00001	99.9943	0.00568095	100.006	-0.00568127										99.9986	1.00004		-100.004	-0.999986
	Seq. 1R	11	0	-100	200	-100	200										200	-2		200	-2
	Seq. 1S	11	0.745763	528.571	-428.571	18.9189	81.0811										125.424	0.237288		-23.7288	-1.25424
	Seq. 1T	11	0.840764	221.951	-121.951	45.0549	54.9451										115.924	0.522293		-52.2293	-1.15924
	SEQUENCES	INPUT SEQUENCE																												SEQUENCES	COMPUTATION AND CALCULATIONS
	QUANTITATIVE SCALE	Seq. 1A	Seq. 1B	Seq. 1C	Seq. 1D	Seq. 1E	Seq. 1F	Seq. 1G	Seq. 1H	Seq. 1I	Seq. 1J	Seq. 1K	Seq. 1L	Seq. 1M	Seq. 1N	Seq. 1O	Seq. 1P	Seq. 1Q	Seq. 1R	Seq. 1S	Seq. 1T									QUANTITATIVE SCALE	Seq. 1A	Seq. 1B	Seq. 1C	Seq. 1D	Seq. 1E	Seq. 1F	Seq. 1G	Seq. 1H	Seq. 1I	Seq. 1J	Seq. 1K	Seq. 1L	Seq. 1M	Seq. 1N	Seq. 1O	Seq. 1P	Seq. 1Q	Seq. 1R	Seq. 1S
	1	12	3	7	8	13	35	35	9	7	4	8	16	64	152	256	3.999	4.001	4	4	4									1	12	3	7	8	13	35	35	9	7	4	8	16	64	152	256	3.999	4.001	4	4
	2	11	3	6	8	12	7	7	9	7	4	8	16	64	152	256	3.999	4.001	4	4	4									2	22	6	12	16	24	14	14	18	14	8	16	32	128	304	512	7.998	8.002	8	8
	3	10	3	5	8	11	7	7	9	7	4	8	16	64	152	256	3.999	4.001	4	4	4									3	30	9	15	24	33	21	21	27	21	12	24	48	192	456	768	11.997	12.003	12	12
	4	9	3	4	8	8	7	7	9	7	4	8	16	64	152	256	3.999	4.001	4	4	4									4	36	12	16	32	32	28	28	36	28	16	32	64	256	608	1024	15.996	16.004	16	16
	5	8	3	4	8	8	7	7	9	7	4	8	16	64	152	256	3.999	4.001	4	4	4									5	40	15	20	40	40	35	35	45	35	20	40	80	320	760	1280	19.995	20.005	20	20
	6	7	3	4	8	8	7	7	9	7	4	4	4	4	4	4	4	4	-4	-8	-16									6	42	18	24	48	48	42	42	54	42	24	24	24	24	24	24	24	24	-24	-48
	7	6	3	4	8	8	7	7	2	2	4	4	4	4	4	4	4	4	-4	-8	-16									7	42	21	28	56	56	49	49	14	14	28	28	28	28	28	28	28	28	-28	-56
	8	5	3	4	8	8	7	7	2	2	4	4	4	4	4	4	4	4	-4	-8	-16									8	40	24	32	64	64	56	56	16	16	32	32	32	32	32	32	32	32	-32	-64
	9	4	3	4	8	8	7	7	2	2	4	4	4	4	4	4	4	4	-4	-8	-16									9	36	27	36	72	72	63	63	18	18	36	36	36	36	36	36	36	36	-36	-72
	10	3	3	3	5	8	7	7	2	2	4	4	4	4	4	4	4	4	-4	-8	-16									10	30	30	30	50	80	70	70	20	20	40	40	40	40	40	40	40	40	-40	-80
	11	2	3	2	4	8	7	7	2	2	0	0	0	0	0	0	0	0	0	0	0									11	22	33	22	44	88	77	77	22	22	0	0	0	0	0	0	0	0	0	0
	12	1	3	1	3	8	2	7	2	2	4	6	10	34	78	130	3.9995	4.0005	0	-2	-6									12	12	36	12	36	96	24	84	24	24	48	72	120	408	936	1560	47.994	48.006	0	-24
	13	0	0	0	0	0	0	0	0	0	4	6	10	34	78	130	3.9995	4.0005	0	-2	-6									13	0	0	0	0	0	0	0	0	0	52	78	130	442	1014	1690	51.9935	52.0065	0	-26
	14	6.5	3	4	7	9	8.9167	9.3333	5.5	4.5	4	6	10	34	78	130	3.9995	4.0005	0	-2	-6									14	91	42	56	98	126	124.834	130.666	77	63	56	84	140	476	1092	1820	55.993	56.007	0	-28
	15	6.5	3	4	7	9	8.9167	9.3333	5.5	4.5	4	6	10	34	78	130	3.9995	4.0005	0	-2	-6									15	97.5	45	60	105	135	133.751	139.999	82.5	67.5	60	90	150	510	1170	1950	59.9925	60.0075	0	-30
	16	6.5	3	4	7	9	8.9167	9.3333	5.5	4.5	4	6	10	34	78	130	3.9995	4.0005	0	-2	-6									16	104	48	64	112	144	142.667	149.333	88	72	64	96	160	544	1248	2080	63.992	64.008	0	-32
	17	6.5	3	4	7	9	8.9167	9.3333	5.5	4.5	4	6	10	34	78	130	3.9995	4.0005	0	-2	-6									17	110.5	51	68	119	153	151.584	158.666	93.5	76.5	68	102	170	578	1326	2210	67.9915	68.0085	0	-34
	18	6.5	3	4	7	9	8.9167	9.3333	5.5	4.5	4	6	10	34	78	130	3.9995	4.0005	0	-2	-6									18	117	54	72	126	162	160.501	167.999	99	81	72	108	180	612	1404	2340	71.991	72.009	0	-36
	19	6.5	3	4	7	9	8.9167	9.3333	5.5	4.5	4	6	10	34	78	130	3.9995	4.0005	0	-2	-6									19	123.5	57	76	133	171	169.417	177.333	104.5	85.5	76	114	190	646	1482	2470	75.9905	76.0095	0	-38
	20	6.5	3	4	7	9	8.9167	9.3333	5.5	4.5	4	6	10	34	78	130	3.9995	4.0005	0	-2	-6									20	130	60	80	140	180	178.334	186.666	110	90	80	120	200	680	1560	2600	79.99	80.01	0	-40
	21	6.5	3	4	7	9	8.9167	9.3333	5.5	4.5	4	6	10	34	78	130	3.9995	4.0005	0	-2	-6									21	136.5	63	84	147	189	187.251	195.999	115.5	94.5	84	126	210	714	1638	2730	83.9895	84.0105	0	-42
	22	6.5	3	4	7	9	8.9167	9.3333	5.5	4.5	0	0	0	0	0	0	0	0	0	0	0									22	143	66	88	154	198	196.167	205.333	121	99	0	0	0	0	0	0	0	0	0	0
	23	6.5	3	4	7	9	8.9167	9.3333	5.5	4.5	0	0	0	0	0	0	0	0	0	0	0									23	149.5	69	92	161	207	205.084	214.666	126.5	103.5	0	0	0	0	0	0	0	0	0	0
	24	6.5	3	4	7	9	8.9167	9.3333	5.5	4.5	0	0	0	0	0	0	0	0	0	0	0									24	156	72	96	168	216	214.001	223.999	132	108	0	0	0	0	0	0	0	0	0	0
	25	6.5	3	4	7	9	8.9167	9.3333	5.5	4.5	0	0	0	0	0	0	0	0	0	0	0									25	162.5	75	100	175	225	222.918	233.332	137.5	112.5	0	0	0	0	0	0	0	0	0	0
	26	0	0	0	0	0	0	0	0	0	0	0	0	0	0	0	0	0	0	0	0									26	0	0	0	0	0	0	0	0	0	0	0	0	0	0	0	0	0	0	0
	27	0	0	0	0	0	0	0	0	0	0	0	0	0	0	0	0	0	0	0	0									27	0	0	0	0	0	0	0	0	0	0	0	0	0	0	0	0	0	0	0
	28	0	0	0	0	0	0	0	0	0	0	0	0	0	0	0	0	0	0	0	0									28	0	0	0	0	0	0	0	0	0	0	0	0	0	0	0	0	0	0	0
	29	0	0	0	0	0	0	0	0	0	0	0	0	0	0	0	0	0	0	0	0									29	0	0	0	0	0	0	0	0	0	0	0	0	0	0	0	0	0	0	0
	30	0	0	0	0	0	0	0	0	0	0	0	0	0	0	0	0	0	0	0	0									30	0	0	0	0	0	0	0	0	0	0	0	0	0	0	0	0	0	0	0
	31	0	0	0	0	0	0	0	0	0	0	0	0	0	0	0	0	0	0	0	0									31	0	0	0	0	0	0	0	0	0	0	0	0	0	0	0	0	0	0	0
	32	0	0	0	0	0	0	0	0	0	0	0	0	0	0	0	0	0	0	0	0									32	0	0	0	0	0	0	0	0	0	0	0	0	0	0	0	0	0	0	0
	33	0	0	0	0	0	0	0	0	0	0	0	0	0	0	0	0	0	0	0	0									33	0	0	0	0	0	0	0	0	0	0	0	0	0	0	0	0	0	0	0
	34	0	0	0	0	0	0	0	0	0	0	0	0	0	0	0	0	0	0	0	0									34	0	0	0	0	0	0	0	0	0	0	0	0	0	0	0	0	0	0	0
	35	0	0	0	0	0	0	0	0	0	0	0	0	0	0	0	0	0	0	0	0									35	0	0	0	0	0	0	0	0	0	0	0	0	0	0	0	0	0	0	0
	36	0	0	0	0	0	0	0	0	0	0	0	0	0	0	0	0	0	0	0	0									36	0	0	0	0	0	0	0	0	0	0	0	0	0	0	0	0	0	0	0
	37	0	0	0	0	0	0	0	0	0	0	0	0	0	0	0	0	0	0	0	0									37	0	0	0	0	0	0	0	0	0	0	0	0	0	0	0	0	0	0	0
	38	0	0	0	0	0	0	0	0	0	0	0	0	0	0	0	0	0	0	0	0									38	0	0	0	0	0	0	0	0	0	0	0	0	0	0	0	0	0	0	0
	39	0	0	0	0	0	0	0	0	0	0	0	0	0	0	0	0	0	0	0	0									39	0	0	0	0	0	0	0	0	0	0	0	0	0	0	0	0	0	0	0
	40	0	0	0	0	0	0	0	0	0	0	0	0	0	0	0	0	0	0	0	0									40	0	0	0	0	0	0	0	0	0	0	0	0	0	0	0	0	0	0	0
	41	0	0	0	0	0	0	0	0	0	0	0	0	0	0	0	0	0	0	0	0									41	0	0	0	0	0	0	0	0	0	0	0	0	0	0	0	0	0	0	0
	42	0	0	0	0	0	0	0	0	0	0	0	0	0	0	0	0	0	0	0	0									42	0	0	0	0	0	0	0	0	0	0	0	0	0	0	0	0	0	0	0
	43	0	0	0	0	0	0	0	0	0	0	0	0	0	0	0	0	0	0	0	0									43	0	0	0	0	0	0	0	0	0	0	0	0	0	0	0	0	0	0	0
	44	0	0	0	0	0	0	0	0	0	0	0	0	0	0	0	0	0	0	0	0									44	0	0	0	0	0	0	0	0	0	0	0	0	0	0	0	0	0	0	0
	45	0	0	0	0	0	0	0	0	0	0	0	0	0	0	0	0	0	0	0	0									45	0	0	0	0	0	0	0	0	0	0	0	0	0	0	0	0	0	0	0
	46	0	0	0	0	0	0	0	0	0	0	0	0	0	0	0	0	0	0	0	0									46	0	0	0	0	0	0	0	0	0	0	0	0	0	0	0	0	0	0	0
	47	0	0	0	0	0	0	0	0	0	0	0	0	0	0	0	0	0	0	0	0									47	0	0	0	0	0	0	0	0	0	0	0	0	0	0	0	0	0	0	0
	48	0	0	0	0	0	0	0	0	0	0	0	0	0	0	0	0	0	0	0	0									48	0	0	0	0	0	0	0	0	0	0	0	0	0	0	0	0	0	0	0
	49	0	0	0	0	0	0	0	0	0	0	0	0	0	0	0	0	0	0	0	0									49	0	0	0	0	0	0	0	0	0	0	0	0	0	0	0	0	0	0	0
	50	0	0	0	0	0	0	0	0	0	0	0	0	0	0	0	0	0	0	0	0									50	0	0	0	0	0	0	0	0	0	0	0	0	0	0	0	0	0	0	0
	51	0	0	0	0	0	0	0	0	0	0	0	0	0	0	0	0	0	0	0	0									51	0	0	0	0	0	0	0	0	0	0	0	0	0	0	0	0	0	0	0
	52	0	0	0	0	0	0	0	0	0	0	0	0	0	0	0	0	0	0	0	0									52	0	0	0	0	0	0	0	0	0	0	0	0	0	0	0	0	0	0	0
	53	0	0	0	0	0	0	0	0	0	0	0	0	0	0	0	0	0	0	0	0									53	0	0	0	0	0	0	0	0	0	0	0	0	0	0	0	0	0	0	0
	54	0	0	0	0	0	0	0	0	0	0	0	0	0	0	0	0	0	0	0	0									54	0	0	0	0	0	0	0	0	0	0	0	0	0	0	0	0	0	0	0
	55	0	0	0	0	0	0	0	0	0	0	0	0	0	0	0	0	0	0	0	0									55	0	0	0	0	0	0	0	0	0	0	0	0	0	0	0	0	0	0	0
	56	0	0	0	0	0	0	0	0	0	0	0	0	0	0	0	0	0	0	0	0									56	0	0	0	0	0	0	0	0	0	0	0	0	0	0	0	0	0	0	0
	57	0	0	0	0	0	0	0	0	0	0	0	0	0	0	0	0	0	0	0	0									57	0	0	0	0	0	0	0	0	0	0	0	0	0	0	0	0	0	0	0
	58	0	0	0	0	0	0	0	0	0	0	0	0	0	0	0	0	0	0	0	0									58	0	0	0	0	0	0	0	0	0	0	0	0	0	0	0	0	0	0	0
	59	0	0	0	0	0	0	0	0	0	0	0	0	0	0	0	0	0	0	0	0									59	0	0	0	0	0	0	0	0	0	0	0	0	0	0	0	0	0	0	0
	60	0	0	0	0	0	0	0	0	0	0	0	0	0	0	0	0	0	0	0	0									60	0	0	0	0	0	0	0	0	0	0	0	0	0	0	0	0	0	0	0
	61	0	0	0	0	0	0	0	0	0	0	0	0	0	0	0	0	0	0	0	0									61	0	0	0	0	0	0	0	0	0	0	0	0	0	0	0	0	0	0	0
	62	0	0	0	0	0	0	0	0	0	0	0	0	0	0	0	0	0	0	0	0									62	0	0	0	0	0	0	0	0	0	0	0	0	0	0	0	0	0	0	0
	63	0	0	0	0	0	0	0	0	0	0	0	0	0	0	0	0	0	0	0	0									63	0	0	0	0	0	0	0	0	0	0	0	0	0	0	0	0	0	0	0
	64	0	0	0	0	0	0	0	0	0	0	0	0	0	0	0	0	0	0	0	0									64	0	0	0	0	0	0	0	0	0	0	0	0	0	0	0	0	0	0	0
	65	0	0	0	0	0	0	0	0	0	0	0	0	0	0	0	0	0	0	0	0									65	0	0	0	0	0	0	0	0	0	0	0	0	0	0	0	0	0	0	0
	66	0	0	0	0	0	0	0	0	0	0	0	0	0	0	0	0	0	0	0	0									66	0	0	0	0	0	0	0	0	0	0	0	0	0	0	0	0	0	0	0
	67	0	0	0	0	0	0	0	0	0	0	0	0	0	0	0	0	0	0	0	0									67	0	0	0	0	0	0	0	0	0	0	0	0	0	0	0	0	0	0	0
	68	0	0	0	0	0	0	0	0	0	0	0	0	0	0	0	0	0	0	0	0									68	0	0	0	0	0	0	0	0	0	0	0	0	0	0	0	0	0	0	0
	69	0	0	0	0	0	0	0	0	0	0	0	0	0	0	0	0	0	0	0	0									69	0	0	0	0	0	0	0	0	0	0	0	0	0	0	0	0	0	0	0
	70	0	0	0	0	0	0	0	0	0	0	0	0	0	0	0	0	0	0	0	0									70	0	0	0	0	0	0	0	0	0	0	0	0	0	0	0	0	0	0	0
	71	0	0	0	0	0	0	0	0	0	0	0	0	0	0	0	0	0	0	0	0									71	0	0	0	0	0	0	0	0	0	0	0	0	0	0	0	0	0	0	0
	72	0	0	0	0	0	0	0	0	0	0	0	0	0	0	0	0	0	0	0	0									72	0	0	0	0	0	0	0	0	0	0	0	0	0	0	0	0	0	0	0
	73	0	0	0	0	0	0	0	0	0	0	0	0	0	0	0	0	0	0	0	0									73	0	0	0	0	0	0	0	0	0	0	0	0	0	0	0	0	0	0	0
	74	0	0	0	0	0	0	0	0	0	0	0	0	0	0	0	0	0	0	0	0									74	0	0	0	0	0	0	0	0	0	0	0	0	0	0	0	0	0	0	0
	75	0	0	0	0	0	0	0	0	0	0	0	0	0	0	0	0	0	0	0	0									75	0	0	0	0	0	0	0	0	0	0	0	0	0	0	0	0	0	0	0
	76	0	0	0	0	0	0	0	0	0	0	0	0	0	0	0	0	0	0	0	0									76	0	0	0	0	0	0	0	0	0	0	0	0	0	0	0	0	0	0	0
	77	0	0	0	0	0	0	0	0	0	0	0	0	0	0	0	0	0	0	0	0									77	0	0	0	0	0	0	0	0	0	0	0	0	0	0	0	0	0	0	0
	78	0	0	0	0	0	0	0	0	0	0	0	0	0	0	0	0	0	0	0	0									78	0	0	0	0	0	0	0	0	0	0	0	0	0	0	0	0	0	0	0
	79	0	0	0	0	0	0	0	0	0	0	0	0	0	0	0	0	0	0	0	0									79	0	0	0	0	0	0	0	0	0	0	0	0	0	0	0	0	0	0	0
	80	0	0	0	0	0	0	0	0	0	0	0	0	0	0	0	0	0	0	0	0									80	0	0	0	0	0	0	0	0	0	0	0	0	0	0	0	0	0	0	0
	81	0	0	0	0	0	0	0	0	0	0	0	0	0	0	0	0	0	0	0	0									81	0	0	0	0	0	0	0	0	0	0	0	0	0	0	0	0	0	0	0
	82	0	0	0	0	0	0	0	0	0	0	0	0	0	0	0	0	0	0	0	0									82	0	0	0	0	0	0	0	0	0	0	0	0	0	0	0	0	0	0	0
	83	0	0	0	0	0	0	0	0	0	0	0	0	0	0	0	0	0	0	0	0									83	0	0	0	0	0	0	0	0	0	0	0	0	0	0	0	0	0	0	0
	84	0	0	0	0	0	0	0	0	0	0	0	0	0	0	0	0	0	0	0	0									84	0	0	0	0	0	0	0	0	0	0	0	0	0	0	0	0	0	0	0
	85	0	0	0	0	0	0	0	0	0	0	0	0	0	0	0	0	0	0	0	0									85	0	0	0	0	0	0	0	0	0	0	0	0	0	0	0	0	0	0	0
	86	0	0	0	0	0	0	0	0	0	0	0	0	0	0	0	0	0	0	0	0									86	0	0	0	0	0	0	0	0	0	0	0	0	0	0	0	0	0	0	0
	87	0	0	0	0	0	0	0	0	0	0	0	0	0	0	0	0	0	0	0	0									87	0	0	0	0	0	0	0	0	0	0	0	0	0	0	0	0	0	0	0
	88	0	0	0	0	0	0	0	0	0	0	0	0	0	0	0	0	0	0	0	0									88	0	0	0	0	0	0	0	0	0	0	0	0	0	0	0	0	0	0	0
	89	0	0	0	0	0	0	0	0	0	0	0	0	0	0	0	0	0	0	0	0									89	0	0	0	0	0	0	0	0	0	0	0	0	0	0	0	0	0	0	0
	90	0	0	0	0	0	0	0	0	0	0	0	0	0	0	0	0	0	0	0	0									90	0	0	0	0	0	0	0	0	0	0	0	0	0	0	0	0	0	0	0
	91	0	0	0	0	0	0	0	0	0	0	0	0	0	0	0	0	0	0	0	0									91	0	0	0	0	0	0	0	0	0	0	0	0	0	0	0	0	0	0	0
	92	0	0	0	0	0	0	0	0	0	0	0	0	0	0	0	0	0	0	0	0									92	0	0	0	0	0	0	0	0	0	0	0	0	0	0	0	0	0	0	0
	93	0	0	0	0	0	0	0	0	0	0	0	0	0	0	0	0	0	0	0	0									93	0	0	0	0	0	0	0	0	0	0	0	0	0	0	0	0	0	0	0
	94	0	0	0	0	0	0	0	0	0	0	0	0	0	0	0	0	0	0	0	0									94	0	0	0	0	0	0	0	0	0	0	0	0	0	0	0	0	0	0	0
	95	0	0	0	0	0	0	0	0	0	0	0	0	0	0	0	0	0	0	0	0									95	0	0	0	0	0	0	0	0	0	0	0	0	0	0	0	0	0	0	0
	96	0	0	0	0	0	0	0	0	0	0	0	0	0	0	0	0	0	0	0	0									96	0	0	0	0	0	0	0	0	0	0	0	0	0	0	0	0	0	0	0
	97	0	0	0	0	0	0	0	0	0	0	0	0	0	0	0	0	0	0	0	0									97	0	0	0	0	0	0	0	0	0	0	0	0	0	0	0	0	0	0	0
	98	0	0	0	0	0	0	0	0	0	0	0	0	0	0	0	0	0	0	0	0									98	0	0	0	0	0	0	0	0	0	0	0	0	0	0	0	0	0	0	0
	99	0	0	0	0	0	0	0	0	0	0	0	0	0	0	0	0	0	0	0	0									99	0	0	0	0	0	0	0	0	0	0	0	0	0	0	0	0	0	0	0
	100	0	0	0	0	0	0	0	0	0	0	0	0	0	0	0	0	0	0	0	0									100	0	0	0	0	0	0	0	0	0	0	0	0	0	0	0	0	0	0	0
	101	0	0	0	0	0	0	0	0	0	0	0	0	0	0	0	0	0	0	0	0									101	0	0	0	0	0	0	0	0	0	0	0	0	0	0	0	0	0	0	0
	102	0	0	0	0	0	0	0	0	0	0	0	0	0	0	0	0	0	0	0	0									102	0	0	0	0	0	0	0	0	0	0	0	0	0	0	0	0	0	0	0
	103	0	0	0	0	0	0	0	0	0	0	0	0	0	0	0	0	0	0	0	0									103	0	0	0	0	0	0	0	0	0	0	0	0	0	0	0	0	0	0	0
	104	0	0	0	0	0	0	0	0	0	0	0	0	0	0	0	0	0	0	0	0									104	0	0	0	0	0	0	0	0	0	0	0	0	0	0	0	0	0	0	0
	105	0	0	0	0	0	0	0	0	0	0	0	0	0	0	0	0	0	0	0	0									105	0	0	0	0	0	0	0	0	0	0	0	0	0	0	0	0	0	0	0
	106	0	0	0	0	0	0	0	0	0	0	0	0	0	0	0	0	0	0	0	0									106	0	0	0	0	0	0	0	0	0	0	0	0	0	0	0	0	0	0	0
	107	0	0	0	0	0	0	0	0	0	0	0	0	0	0	0	0	0	0	0	0									107	0	0	0	0	0	0	0	0	0	0	0	0	0	0	0	0	0	0	0
	108	0	0	0	0	0	0	0	0	0	0	0	0	0	0	0	0	0	0	0	0									108	0	0	0	0	0	0	0	0	0	0	0	0	0	0	0	0	0	0	0
	109	0	0	0	0	0	0	0	0	0	0	0	0	0	0	0	0	0	0	0	0									109	0	0	0	0	0	0	0	0	0	0	0	0	0	0	0	0	0	0	0
	110	0	0	0	0	0	0	0	0	0	0	0	0	0	0	0	0	0	0	0	0									110	0	0	0	0	0	0	0	0	0	0	0	0	0	0	0	0	0	0	0
	111	0	0	0	0	0	0	0	0	0	0	0	0	0	0	0	0	0	0	0	0									111	0	0	0	0	0	0	0	0	0	0	0	0	0	0	0	0	0	0	0
	112	0	0	0	0	0	0	0	0	0	0	0	0	0	0	0	0	0	0	0	0									112	0	0	0	0	0	0	0	0	0	0	0	0	0	0	0	0	0	0	0
	113	0	0	0	0	0	0	0	0	0	0	0	0	0	0	0	0	0	0	0	0									113	0	0	0	0	0	0	0	0	0	0	0	0	0	0	0	0	0	0	0
	114	0	0	0	0	0	0	0	0	0	0	0	0	0	0	0	0	0	0	0	0									114	0	0	0	0	0	0	0	0	0	0	0	0	0	0	0	0	0	0	0
	115	0	0	0	0	0	0	0	0	0	0	0	0	0	0	0	0	0	0	0	0									115	0	0	0	0	0	0	0	0	0	0	0	0	0	0	0	0	0	0	0
	116	0	0	0	0	0	0	0	0	0	0	0	0	0	0	0	0	0	0	0	0									116	0	0	0	0	0	0	0	0	0	0	0	0	0	0	0	0	0	0	0
	117	0	0	0	0	0	0	0	0	0	0	0	0	0	0	0	0	0	0	0	0									117	0	0	0	0	0	0	0	0	0	0	0	0	0	0	0	0	0	0	0
	118	0	0	0	0	0	0	0	0	0	0	0	0	0	0	0	0	0	0	0	0									118	0	0	0	0	0	0	0	0	0	0	0	0	0	0	0	0	0	0	0
	119	0	0	0	0	0	0	0	0	0	0	0	0	0	0	0	0	0	0	0	0									119	0	0	0	0	0	0	0	0	0	0	0	0	0	0	0	0	0	0	0
	120	0	0	0	0	0	0	0	0	0	0	0	0	0	0	0	0	0	0	0	0									120	0	0	0	0	0	0	0	0	0	0	0	0	0	0	0	0	0	0	0
	121	0	0	0	0	0	0	0	0	0	0	0	0	0	0	0	0	0	0	0	0									121	0	0	0	0	0	0	0	0	0	0	0	0	0	0	0	0	0	0	0
	122	0	0	0	0	0	0	0	0	0	0	0	0	0	0	0	0	0	0	0	0									122	0	0	0	0	0	0	0	0	0	0	0	0	0	0	0	0	0	0	0
	123	0	0	0	0	0	0	0	0	0	0	0	0	0	0	0	0	0	0	0	0									123	0	0	0	0	0	0	0	0	0	0	0	0	0	0	0	0	0	0	0
	124	0	0	0	0	0	0	0	0	0	0	0	0	0	0	0	0	0	0	0	0									124	0	0	0	0	0	0	0	0	0	0	0	0	0	0	0	0	0	0	0
	125	0	0	0	0	0	0	0	0	0	0	0	0	0	0	0	0	0	0	0	0									125	0	0	0	0	0	0	0	0	0	0	0	0	0	0	0	0	0	0	0
	126	0	0	0	0	0	0	0	0	0	0	0	0	0	0	0	0	0	0	0	0									126	0	0	0	0	0	0	0	0	0	0	0	0	0	0	0	0	0	0	0
	127	0	0	0	0	0	0	0	0	0	0	0	0	0	0	0	0	0	0	0	0									127	0	0	0	0	0	0	0	0	0	0	0	0	0	0	0	0	0	0	0
	128	0	0	0	0	0	0	0	0	0	0	0	0	0	0	0	0	0	0	0	0									128	0	0	0	0	0	0	0	0	0	0	0	0	0	0	0	0	0	0	0
	129	0	0	0	0	0	0	0	0	0	0	0	0	0	0	0	0	0	0	0	0									129	0	0	0	0	0	0	0	0	0	0	0	0	0	0	0	0	0	0	0
	130	0	0	0	0	0	0	0	0	0	0	0	0	0	0	0	0	0	0	0	0									130	0	0	0	0	0	0	0	0	0	0	0	0	0	0	0	0	0	0	0
	131	0	0	0	0	0	0	0	0	0	0	0	0	0	0	0	0	0	0	0	0									131	0	0	0	0	0	0	0	0	0	0	0	0	0	0	0	0	0	0	0
	132	0	0	0	0	0	0	0	0	0	0	0	0	0	0	0	0	0	0	0	0									132	0	0	0	0	0	0	0	0	0	0	0	0	0	0	0	0	0	0	0
	133	0	0	0	0	0	0	0	0	0	0	0	0	0	0	0	0	0	0	0	0									133	0	0	0	0	0	0	0	0	0	0	0	0	0	0	0	0	0	0	0
	134	0	0	0	0	0	0	0	0	0	0	0	0	0	0	0	0	0	0	0	0									134	0	0	0	0	0	0	0	0	0	0	0	0	0	0	0	0	0	0	0
	135	0	0	0	0	0	0	0	0	0	0	0	0	0	0	0	0	0	0	0	0									135	0	0	0	0	0	0	0	0	0	0	0	0	0	0	0	0	0	0	0
	136	0	0	0	0	0	0	0	0	0	0	0	0	0	0	0	0	0	0	0	0									136	0	0	0	0	0	0	0	0	0	0	0	0	0	0	0	0	0	0	0
	137	0	0	0	0	0	0	0	0	0	0	0	0	0	0	0	0	0	0	0	0									137	0	0	0	0	0	0	0	0	0	0	0	0	0	0	0	0	0	0	0
	138	0	0	0	0	0	0	0	0	0	0	0	0	0	0	0	0	0	0	0	0									138	0	0	0	0	0	0	0	0	0	0	0	0	0	0	0	0	0	0	0
	139	0	0	0	0	0	0	0	0	0	0	0	0	0	0	0	0	0	0	0	0									139	0	0	0	0	0	0	0	0	0	0	0	0	0	0	0	0	0	0	0
	140	0	0	0	0	0	0	0	0	0	0	0	0	0	0	0	0	0	0	0	0									140	0	0	0	0	0	0	0	0	0	0	0	0	0	0	0	0	0	0	0
	141	0	0	0	0	0	0	0	0	0	0	0	0	0	0	0	0	0	0	0	0									141	0	0	0	0	0	0	0	0	0	0	0	0	0	0	0	0	0	0	0
	142	0	0	0	0	0	0	0	0	0	0	0	0	0	0	0	0	0	0	0	0									142	0	0	0	0	0	0	0	0	0	0	0	0	0	0	0	0	0	0	0
	143	0	0	0	0	0	0	0	0	0	0	0	0	0	0	0	0	0	0	0	0									143	0	0	0	0	0	0	0	0	0	0	0	0	0	0	0	0	0	0	0
	144	0	0	0	0	0	0	0	0	0	0	0	0	0	0	0	0	0	0	0	0									144	0	0	0	0	0	0	0	0	0	0	0	0	0	0	0	0	0	0	0
	145	0	0	0	0	0	0	0	0	0	0	0	0	0	0	0	0	0	0	0	0									145	0	0	0	0	0	0	0	0	0	0	0	0	0	0	0	0	0	0	0
	146	0	0	0	0	0	0	0	0	0	0	0	0	0	0	0	0	0	0	0	0									146	0	0	0	0	0	0	0	0	0	0	0	0	0	0	0	0	0	0	0
	147	0	0	0	0	0	0	0	0	0	0	0	0	0	0	0	0	0	0	0	0									147	0	0	0	0	0	0	0	0	0	0	0	0	0	0	0	0	0	0	0
	148	0	0	0	0	0	0	0	0	0	0	0	0	0	0	0	0	0	0	0	0									148	0	0	0	0	0	0	0	0	0	0	0	0	0	0	0	0	0	0	0
	149	0	0	0	0	0	0	0	0	0	0	0	0	0	0	0	0	0	0	0	0									149	0	0	0	0	0	0	0	0	0	0	0	0	0	0	0	0	0	0	0
	150	0	0	0	0	0	0	0	0	0	0	0	0	0	0	0	0	0	0	0	0									150	0	0	0	0	0	0	0	0	0	0	0	0	0	0	0	0	0	0	0
	151	0	0	0	0	0	0	0	0	0	0	0	0	0	0	0	0	0	0	0	0									151	0	0	0	0	0	0	0	0	0	0	0	0	0	0	0	0	0	0	0
	152	0	0	0	0	0	0	0	0	0	0	0	0	0	0	0	0	0	0	0	0									152	0	0	0	0	0	0	0	0	0	0	0	0	0	0	0	0	0	0	0
	153	0	0	0	0	0	0	0	0	0	0	0	0	0	0	0	0	0	0	0	0									153	0	0	0	0	0	0	0	0	0	0	0	0	0	0	0	0	0	0	0
	154	0	0	0	0	0	0	0	0	0	0	0	0	0	0	0	0	0	0	0	0									154	0	0	0	0	0	0	0	0	0	0	0	0	0	0	0	0	0	0	0
	155	0	0	0	0	0	0	0	0	0	0	0	0	0	0	0	0	0	0	0	0									155	0	0	0	0	0	0	0	0	0	0	0	0	0	0	0	0	0	0	0
	156	0	0	0	0	0	0	0	0	0	0	0	0	0	0	0	0	0	0	0	0									156	0	0	0	0	0	0	0	0	0	0	0	0	0	0	0	0	0	0	0
	157	0	0	0	0	0	0	0	0	0	0	0	0	0	0	0	0	0	0	0	0									157	0	0	0	0	0	0	0	0	0	0	0	0	0	0	0	0	0	0	0
	158	0	0	0	0	0	0	0	0	0	0	0	0	0	0	0	0	0	0	0	0									158	0	0	0	0	0	0	0	0	0	0	0	0	0	0	0	0	0	0	0
	159	0	0	0	0	0	0	0	0	0	0	0	0	0	0	0	0	0	0	0	0									159	0	0	0	0	0	0	0	0	0	0	0	0	0	0	0	0	0	0	0
	160	0	0	0	0	0	0	0	0	0	0	0	0	0	0	0	0	0	0	0	0									160	0	0	0	0	0	0	0	0	0	0	0	0	0	0	0	0	0	0	0
	161	0	0	0	0	0	0	0	0	0	0	0	0	0	0	0	0	0	0	0	0									161	0	0	0	0	0	0	0	0	0	0	0	0	0	0	0	0	0	0	0
	162	0	0	0	0	0	0	0	0	0	0	0	0	0	0	0	0	0	0	0	0									162	0	0	0	0	0	0	0	0	0	0	0	0	0	0	0	0	0	0	0
	163	0	0	0	0	0	0	0	0	0	0	0	0	0	0	0	0	0	0	0	0									163	0	0	0	0	0	0	0	0	0	0	0	0	0	0	0	0	0	0	0
	164	0	0	0	0	0	0	0	0	0	0	0	0	0	0	0	0	0	0	0	0									164	0	0	0	0	0	0	0	0	0	0	0	0	0	0	0	0	0	0	0
	165	0	0	0	0	0	0	0	0	0	0	0	0	0	0	0	0	0	0	0	0									165	0	0	0	0	0	0	0	0	0	0	0	0	0	0	0	0	0	0	0
	166	0	0	0	0	0	0	0	0	0	0	0	0	0	0	0	0	0	0	0	0									166	0	0	0	0	0	0	0	0	0	0	0	0	0	0	0	0	0	0	0
	167	0	0	0	0	0	0	0	0	0	0	0	0	0	0	0	0	0	0	0	0									167	0	0	0	0	0	0	0	0	0	0	0	0	0	0	0	0	0	0	0
	168	0	0	0	0	0	0	0	0	0	0	0	0	0	0	0	0	0	0	0	0									168	0	0	0	0	0	0	0	0	0	0	0	0	0	0	0	0	0	0	0
	169	0	0	0	0	0	0	0	0	0	0	0	0	0	0	0	0	0	0	0	0									169	0	0	0	0	0	0	0	0	0	0	0	0	0	0	0	0	0	0	0
	170	0	0	0	0	0	0	0	0	0	0	0	0	0	0	0	0	0	0	0	0									170	0	0	0	0	0	0	0	0	0	0	0	0	0	0	0	0	0	0	0
	171	0	0	0	0	0	0	0	0	0	0	0	0	0	0	0	0	0	0	0	0									171	0	0	0	0	0	0	0	0	0	0	0	0	0	0	0	0	0	0	0
	172	0	0	0	0	0	0	0	0	0	0	0	0	0	0	0	0	0	0	0	0									172	0	0	0	0	0	0	0	0	0	0	0	0	0	0	0	0	0	0	0
	173	0	0	0	0	0	0	0	0	0	0	0	0	0	0	0	0	0	0	0	0									173	0	0	0	0	0	0	0	0	0	0	0	0	0	0	0	0	0	0	0
	174	0	0	0	0	0	0	0	0	0	0	0	0	0	0	0	0	0	0	0	0									174	0	0	0	0	0	0	0	0	0	0	0	0	0	0	0	0	0	0	0
	175	0	0	0	0	0	0	0	0	0	0	0	0	0	0	0	0	0	0	0	0									175	0	0	0	0	0	0	0	0	0	0	0	0	0	0	0	0	0	0	0
	176	0	0	0	0	0	0	0	0	0	0	0	0	0	0	0	0	0	0	0	0									176	0	0	0	0	0	0	0	0	0	0	0	0	0	0	0	0	0	0	0
	177	0	0	0	0	0	0	0	0	0	0	0	0	0	0	0	0	0	0	0	0									177	0	0	0	0	0	0	0	0	0	0	0	0	0	0	0	0	0	0	0
	178	0	0	0	0	0	0	0	0	0	0	0	0	0	0	0	0	0	0	0	0									178	0	0	0	0	0	0	0	0	0	0	0	0	0	0	0	0	0	0	0
	179	0	0	0	0	0	0	0	0	0	0	0	0	0	0	0	0	0	0	0	0									179	0	0	0	0	0	0	0	0	0	0	0	0	0	0	0	0	0	0	0
	180	0	0	0	0	0	0	0	0	0	0	0	0	0	0	0	0	0	0	0	0									180	0	0	0	0	0	0	0	0	0	0	0	0	0	0	0	0	0	0	0
	181	0	0	0	0	0	0	0	0	0	0	0	0	0	0	0	0	0	0	0	0									181	0	0	0	0	0	0	0	0	0	0	0	0	0	0	0	0	0	0	0
	182	0	0	0	0	0	0	0	0	0	0	0	0	0	0	0	0	0	0	0	0									182	0	0	0	0	0	0	0	0	0	0	0	0	0	0	0	0	0	0	0
	183	0	0	0	0	0	0	0	0	0	0	0	0	0	0	0	0	0	0	0	0									183	0	0	0	0	0	0	0	0	0	0	0	0	0	0	0	0	0	0	0
	184	0	0	0	0	0	0	0	0	0	0	0	0	0	0	0	0	0	0	0	0									184	0	0	0	0	0	0	0	0	0	0	0	0	0	0	0	0	0	0	0
	185	0	0	0	0	0	0	0	0	0	0	0	0	0	0	0	0	0	0	0	0									185	0	0	0	0	0	0	0	0	0	0	0	0	0	0	0	0	0	0	0
	186	0	0	0	0	0	0	0	0	0	0	0	0	0	0	0	0	0	0	0	0									186	0	0	0	0	0	0	0	0	0	0	0	0	0	0	0	0	0	0	0
	187	0	0	0	0	0	0	0	0	0	0	0	0	0	0	0	0	0	0	0	0									187	0	0	0	0	0	0	0	0	0	0	0	0	0	0	0	0	0	0	0
	188	0	0	0	0	0	0	0	0	0	0	0	0	0	0	0	0	0	0	0	0									188	0	0	0	0	0	0	0	0	0	0	0	0	0	0	0	0	0	0	0
	189	0	0	0	0	0	0	0	0	0	0	0	0	0	0	0	0	0	0	0	0									189	0	0	0	0	0	0	0	0	0	0	0	0	0	0	0	0	0	0	0
	190	0	0	0	0	0	0	0	0	0	0	0	0	0	0	0	0	0	0	0	0									190	0	0	0	0	0	0	0	0	0	0	0	0	0	0	0	0	0	0	0
	191	0	0	0	0	0	0	0	0	0	0	0	0	0	0	0	0	0	0	0	0									191	0	0	0	0	0	0	0	0	0	0	0	0	0	0	0	0	0	0	0
	192	0	0	0	0	0	0	0	0	0	0	0	0	0	0	0	0	0	0	0	0									192	0	0	0	0	0	0	0	0	0	0	0	0	0	0	0	0	0	0	0
	193	0	0	0	0	0	0	0	0	0	0	0	0	0	0	0	0	0	0	0	0									193	0	0	0	0	0	0	0	0	0	0	0	0	0	0	0	0	0	0	0
	194	0	0	0	0	0	0	0	0	0	0	0	0	0	0	0	0	0	0	0	0									194	0	0	0	0	0	0	0	0	0	0	0	0	0	0	0	0	0	0	0
	195	0	0	0	0	0	0	0	0	0	0	0	0	0	0	0	0	0	0	0	0									195	0	0	0	0	0	0	0	0	0	0	0	0	0	0	0	0	0	0	0
	196	0	0	0	0	0	0	0	0	0	0	0	0	0	0	0	0	0	0	0	0									196	0	0	0	0	0	0	0	0	0	0	0	0	0	0	0	0	0	0	0
	197	0	0	0	0	0	0	0	0	0	0	0	0	0	0	0	0	0	0	0	0									197	0	0	0	0	0	0	0	0	0	0	0	0	0	0	0	0	0	0	0
	198	0	0	0	0	0	0	0	0	0	0	0	0	0	0	0	0	0	0	0	0									198	0	0	0	0	0	0	0	0	0	0	0	0	0	0	0	0	0	0	0
	199	0	0	0	0	0	0	0	0	0	0	0	0	0	0	0	0	0	0	0	0									199	0	0	0	0	0	0	0	0	0	0	0	0	0	0	0	0	0	0	0
	200	0	0	0	0	0	0	0	0	0	0	0	0	0	0	0	0	0	0	0	0									200	0	0	0	0	0	0	0	0	0	0	0	0	0	0	0	0	0	0	0
	201	0	0	0	0	0	0	0	0	0	0	0	0	0	0	0	0	0	0	0	0									201	0	0	0	0	0	0	0	0	0	0	0	0	0	0	0	0	0	0	0
	202	0	0	0	0	0	0	0	0	0	0	0	0	0	0	0	0	0	0	0	0									202	0	0	0	0	0	0	0	0	0	0	0	0	0	0	0	0	0	0	0
	203	0	0	0	0	0	0	0	0	0	0	0	0	0	0	0	0	0	0	0	0									203	0	0	0	0	0	0	0	0	0	0	0	0	0	0	0	0	0	0	0
	204	0	0	0	0	0	0	0	0	0	0	0	0	0	0	0	0	0	0	0	0									204	0	0	0	0	0	0	0	0	0	0	0	0	0	0	0	0	0	0	0
	205	0	0	0	0	0	0	0	0	0	0	0	0	0	0	0	0	0	0	0	0									205	0	0	0	0	0	0	0	0	0	0	0	0	0	0	0	0	0	0	0
	206	0	0	0	0	0	0	0	0	0	0	0	0	0	0	0	0	0	0	0	0									206	0	0	0	0	0	0	0	0	0	0	0	0	0	0	0	0	0	0	0
	207	0	0	0	0	0	0	0	0	0	0	0	0	0	0	0	0	0	0	0	0									207	0	0	0	0	0	0	0	0	0	0	0	0	0	0	0	0	0	0	0
	208	0	0	0	0	0	0	0	0	0	0	0	0	0	0	0	0	0	0	0	0									208	0	0	0	0	0	0	0	0	0	0	0	0	0	0	0	0	0	0	0
	209	0	0	0	0	0	0	0	0	0	0	0	0	0	0	0	0	0	0	0	0									209	0	0	0	0	0	0	0	0	0	0	0	0	0	0	0	0	0	0	0
	210	0	0	0	0	0	0	0	0	0	0	0	0	0	0	0	0	0	0	0	0									210	0	0	0	0	0	0	0	0	0	0	0	0	0	0	0	0	0	0	0
	211	0	0	0	0	0	0	0	0	0	0	0	0	0	0	0	0	0	0	0	0									211	0	0	0	0	0	0	0	0	0	0	0	0	0	0	0	0	0	0	0
	212	0	0	0	0	0	0	0	0	0	0	0	0	0	0	0	0	0	0	0	0									212	0	0	0	0	0	0	0	0	0	0	0	0	0	0	0	0	0	0	0
	213	0	0	0	0	0	0	0	0	0	0	0	0	0	0	0	0	0	0	0	0									213	0	0	0	0	0	0	0	0	0	0	0	0	0	0	0	0	0	0	0
	214	0	0	0	0	0	0	0	0	0	0	0	0	0	0	0	0	0	0	0	0									214	0	0	0	0	0	0	0	0	0	0	0	0	0	0	0	0	0	0	0
	215	0	0	0	0	0	0	0	0	0	0	0	0	0	0	0	0	0	0	0	0									215	0	0	0	0	0	0	0	0	0	0	0	0	0	0	0	0	0	0	0
	216	0	0	0	0	0	0	0	0	0	0	0	0	0	0	0	0	0	0	0	0									216	0	0	0	0	0	0	0	0	0	0	0	0	0	0	0	0	0	0	0
	217	0	0	0	0	0	0	0	0	0	0	0	0	0	0	0	0	0	0	0	0									217	0	0	0	0	0	0	0	0	0	0	0	0	0	0	0	0	0	0	0
	218	0	0	0	0	0	0	0	0	0	0	0	0	0	0	0	0	0	0	0	0									218	0	0	0	0	0	0	0	0	0	0	0	0	0	0	0	0	0	0	0
	219	0	0	0	0	0	0	0	0	0	0	0	0	0	0	0	0	0	0	0	0									219	0	0	0	0	0	0	0	0	0	0	0	0	0	0	0	0	0	0	0
	220	0	0	0	0	0	0	0	0	0	0	0	0	0	0	0	0	0	0	0	0									220	0	0	0	0	0	0	0	0	0	0	0	0	0	0	0	0	0	0	0
	221	0	0	0	0	0	0	0	0	0	0	0	0	0	0	0	0	0	0	0	0									221	0	0	0	0	0	0	0	0	0	0	0	0	0	0	0	0	0	0	0
	222	0	0	0	0	0	0	0	0	0	0	0	0	0	0	0	0	0	0	0	0									222	0	0	0	0	0	0	0	0	0	0	0	0	0	0	0	0	0	0	0
	223	0	0	0	0	0	0	0	0	0	0	0	0	0	0	0	0	0	0	0	0									223	0	0	0	0	0	0	0	0	0	0	0	0	0	0	0	0	0	0	0
	224	0	0	0	0	0	0	0	0	0	0	0	0	0	0	0	0	0	0	0	0									224	0	0	0	0	0	0	0	0	0	0	0	0	0	0	0	0	0	0	0
	225	0	0	0	0	0	0	0	0	0	0	0	0	0	0	0	0	0	0	0	0									225	0	0	0	0	0	0	0	0	0	0	0	0	0	0	0	0	0	0	0
	226	0	0	0	0	0	0	0	0	0	0	0	0	0	0	0	0	0	0	0	0									226	0	0	0	0	0	0	0	0	0	0	0	0	0	0	0	0	0	0	0
	227	0	0	0	0	0	0	0	0	0	0	0	0	0	0	0	0	0	0	0	0									227	0	0	0	0	0	0	0	0	0	0	0	0	0	0	0	0	0	0	0
	228	0	0	0	0	0	0	0	0	0	0	0	0	0	0	0	0	0	0	0	0									228	0	0	0	0	0	0	0	0	0	0	0	0	0	0	0	0	0	0	0
	229	0	0	0	0	0	0	0	0	0	0	0	0	0	0	0	0	0	0	0	0									229	0	0	0	0	0	0	0	0	0	0	0	0	0	0	0	0	0	0	0
	230	0	0	0	0	0	0	0	0	0	0	0	0	0	0	0	0	0	0	0	0									230	0	0	0	0	0	0	0	0	0	0	0	0	0	0	0	0	0	0	0
	231	0	0	0	0	0	0	0	0	0	0	0	0	0	0	0	0	0	0	0	0									231	0	0	0	0	0	0	0	0	0	0	0	0	0	0	0	0	0	0	0
	232	0	0	0	0	0	0	0	0	0	0	0	0	0	0	0	0	0	0	0	0									232	0	0	0	0	0	0	0	0	0	0	0	0	0	0	0	0	0	0	0
	233	0	0	0	0	0	0	0	0	0	0	0	0	0	0	0	0	0	0	0	0									233	0	0	0	0	0	0	0	0	0	0	0	0	0	0	0	0	0	0	0
	234	0	0	0	0	0	0	0	0	0	0	0	0	0	0	0	0	0	0	0	0									234	0	0	0	0	0	0	0	0	0	0	0	0	0	0	0	0	0	0	0
	235	0	0	0	0	0	0	0	0	0	0	0	0	0	0	0	0	0	0	0	0									235	0	0	0	0	0	0	0	0	0	0	0	0	0	0	0	0	0	0	0
	236	0	0	0	0	0	0	0	0	0	0	0	0	0	0	0	0	0	0	0	0									236	0	0	0	0	0	0	0	0	0	0	0	0	0	0	0	0	0	0	0
	237	0	0	0	0	0	0	0	0	0	0	0	0	0	0	0	0	0	0	0	0									237	0	0	0	0	0	0	0	0	0	0	0	0	0	0	0	0	0	0	0
	238	0	0	0	0	0	0	0	0	0	0	0	0	0	0	0	0	0	0	0	0									238	0	0	0	0	0	0	0	0	0	0	0	0	0	0	0	0	0	0	0
	239	0	0	0	0	0	0	0	0	0	0	0	0	0	0	0	0	0	0	0	0									239	0	0	0	0	0	0	0	0	0	0	0	0	0	0	0	0	0	0	0
	240	0	0	0	0	0	0	0	0	0	0	0	0	0	0	0	0	0	0	0	0									240	0	0	0	0	0	0	0	0	0	0	0	0	0	0	0	0	0	0	0
	241	0	0	0	0	0	0	0	0	0	0	0	0	0	0	0	0	0	0	0	0									241	0	0	0	0	0	0	0	0	0	0	0	0	0	0	0	0	0	0	0
	242	0	0	0	0	0	0	0	0	0	0	0	0	0	0	0	0	0	0	0	0									242	0	0	0	0	0	0	0	0	0	0	0	0	0	0	0	0	0	0	0
	243	0	0	0	0	0	0	0	0	0	0	0	0	0	0	0	0	0	0	0	0									243	0	0	0	0	0	0	0	0	0	0	0	0	0	0	0	0	0	0	0
	244	0	0	0	0	0	0	0	0	0	0	0	0	0	0	0	0	0	0	0	0									244	0	0	0	0	0	0	0	0	0	0	0	0	0	0	0	0	0	0	0
	245	0	0	0	0	0	0	0	0	0	0	0	0	0	0	0	0	0	0	0	0									245	0	0	0	0	0	0	0	0	0	0	0	0	0	0	0	0	0	0	0
	246	0	0	0	0	0	0	0	0	0	0	0	0	0	0	0	0	0	0	0	0									246	0	0	0	0	0	0	0	0	0	0	0	0	0	0	0	0	0	0	0
	247	0	0	0	0	0	0	0	0	0	0	0	0	0	0	0	0	0	0	0	0									247	0	0	0	0	0	0	0	0	0	0	0	0	0	0	0	0	0	0	0
	248	0	0	0	0	0	0	0	0	0	0	0	0	0	0	0	0	0	0	0	0									248	0	0	0	0	0	0	0	0	0	0	0	0	0	0	0	0	0	0	0
	249	0	0	0	0	0	0	0	0	0	0	0	0	0	0	0	0	0	0	0	0									249	0	0	0	0	0	0	0	0	0	0	0	0	0	0	0	0	0	0	0
	250	0	0	0	0	0	0	0	0	0	0	0	0	0	0	0	0	0	0	0	0									250	0	0	0	0	0	0	0	0	0	0	0	0	0	0	0	0	0	0	0
	251	0	0	0	0	0	0	0	0	0	0	0	0	0	0	0	0	0	0	0	0									251	0	0	0	0	0	0	0	0	0	0	0	0	0	0	0	0	0	0	0
	252	0	0	0	0	0	0	0	0	0	0	0	0	0	0	0	0	0	0	0	0									252	0	0	0	0	0	0	0	0	0	0	0	0	0	0	0	0	0	0	0
	253	0	0	0	0	0	0	0	0	0	0	0	0	0	0	0	0	0	0	0	0									253	0	0	0	0	0	0	0	0	0	0	0	0	0	0	0	0	0	0	0
	254	0	0	0	0	0	0	0	0	0	0	0	0	0	0	0	0	0	0	0	0									254	0	0	0	0	0	0	0	0	0	0	0	0	0	0	0	0	0	0	0
	255	0	0	0	0	0	0	0	0	0	0	0	0	0	0	0	0	0	0	0	0									255	0	0	0	0	0	0	0	0	0	0	0	0	0	0	0	0	0	0	0
	256	0	0	0	0	0	0	0	0	0	0	0	0	0	0	0	0	0	0	0	0									256	0	0	0	0	0	0	0	0	0	0	0	0	0	0	0	0	0	0	0
	257	0	0	0	0	0	0	0	0	0	0	0	0	0	0	0	0	0	0	0	0									257	0	0	0	0	0	0	0	0	0	0	0	0	0	0	0	0	0	0	0
	258	0	0	0	0	0	0	0	0	0	0	0	0	0	0	0	0	0	0	0	0									258	0	0	0	0	0	0	0	0	0	0	0	0	0	0	0	0	0	0	0
	259	0	0	0	0	0	0	0	0	0	0	0	0	0	0	0	0	0	0	0	0									259	0	0	0	0	0	0	0	0	0	0	0	0	0	0	0	0	0	0	0
	260	0	0	0	0	0	0	0	0	0	0	0	0	0	0	0	0	0	0	0	0									260	0	0	0	0	0	0	0	0	0	0	0	0	0	0	0	0	0	0	0
	261	0	0	0	0	0	0	0	0	0	0	0	0	0	0	0	0	0	0	0	0									261	0	0	0	0	0	0	0	0	0	0	0	0	0	0	0	0	0	0	0
	262	0	0	0	0	0	0	0	0	0	0	0	0	0	0	0	0	0	0	0	0									262	0	0	0	0	0	0	0	0	0	0	0	0	0	0	0	0	0	0	0
	263	0	0	0	0	0	0	0	0	0	0	0	0	0	0	0	0	0	0	0	0									263	0	0	0	0	0	0	0	0	0	0	0	0	0	0	0	0	0	0	0
	264	0	0	0	0	0	0	0	0	0	0	0	0	0	0	0	0	0	0	0	0									264	0	0	0	0	0	0	0	0	0	0	0	0	0	0	0	0	0	0	0
	265	0	0	0	0	0	0	0	0	0	0	0	0	0	0	0	0	0	0	0	0									265	0	0	0	0	0	0	0	0	0	0	0	0	0	0	0	0	0	0	0
	266	0	0	0	0	0	0	0	0	0	0	0	0	0	0	0	0	0	0	0	0									266	0	0	0	0	0	0	0	0	0	0	0	0	0	0	0	0	0	0	0
	267	0	0	0	0	0	0	0	0	0	0	0	0	0	0	0	0	0	0	0	0									267	0	0	0	0	0	0	0	0	0	0	0	0	0	0	0	0	0	0	0
	268	0	0	0	0	0	0	0	0	0	0	0	0	0	0	0	0	0	0	0	0									268	0	0	0	0	0	0	0	0	0	0	0	0	0	0	0	0	0	0	0
	269	0	0	0	0	0	0	0	0	0	0	0	0	0	0	0	0	0	0	0	0									269	0	0	0	0	0	0	0	0	0	0	0	0	0	0	0	0	0	0	0
	270	0	0	0	0	0	0	0	0	0	0	0	0	0	0	0	0	0	0	0	0									270	0	0	0	0	0	0	0	0	0	0	0	0	0	0	0	0	0	0	0
	271	0	0	0	0	0	0	0	0	0	0	0	0	0	0	0	0	0	0	0	0									271	0	0	0	0	0	0	0	0	0	0	0	0	0	0	0	0	0	0	0
	272	0	0	0	0	0	0	0	0	0	0	0	0	0	0	0	0	0	0	0	0									272	0	0	0	0	0	0	0	0	0	0	0	0	0	0	0	0	0	0	0
	273	0	0	0	0	0	0	0	0	0	0	0	0	0	0	0	0	0	0	0	0									273	0	0	0	0	0	0	0	0	0	0	0	0	0	0	0	0	0	0	0
	274	0	0	0	0	0	0	0	0	0	0	0	0	0	0	0	0	0	0	0	0									274	0	0	0	0	0	0	0	0	0	0	0	0	0	0	0	0	0	0	0
	275	0	0	0	0	0	0	0	0	0	0	0	0	0	0	0	0	0	0	0	0									275	0	0	0	0	0	0	0	0	0	0	0	0	0	0	0	0	0	0	0
	276	0	0	0	0	0	0	0	0	0	0	0	0	0	0	0	0	0	0	0	0									276	0	0	0	0	0	0	0	0	0	0	0	0	0	0	0	0	0	0	0
	277	0	0	0	0	0	0	0	0	0	0	0	0	0	0	0	0	0	0	0	0									277	0	0	0	0	0	0	0	0	0	0	0	0	0	0	0	0	0	0	0
	278	0	0	0	0	0	0	0	0	0	0	0	0	0	0	0	0	0	0	0	0									278	0	0	0	0	0	0	0	0	0	0	0	0	0	0	0	0	0	0	0
	279	0	0	0	0	0	0	0	0	0	0	0	0	0	0	0	0	0	0	0	0									279	0	0	0	0	0	0	0	0	0	0	0	0	0	0	0	0	0	0	0
	280	0	0	0	0	0	0	0	0	0	0	0	0	0	0	0	0	0	0	0	0									280	0	0	0	0	0	0	0	0	0	0	0	0	0	0	0	0	0	0	0
	281	0	0	0	0	0	0	0	0	0	0	0	0	0	0	0	0	0	0	0	0									281	0	0	0	0	0	0	0	0	0	0	0	0	0	0	0	0	0	0	0
	282	0	0	0	0	0	0	0	0	0	0	0	0	0	0	0	0	0	0	0	0									282	0	0	0	0	0	0	0	0	0	0	0	0	0	0	0	0	0	0	0
	283	0	0	0	0	0	0	0	0	0	0	0	0	0	0	0	0	0	0	0	0									283	0	0	0	0	0	0	0	0	0	0	0	0	0	0	0	0	0	0	0
	284	0	0	0	0	0	0	0	0	0	0	0	0	0	0	0	0	0	0	0	0									284	0	0	0	0	0	0	0	0	0	0	0	0	0	0	0	0	0	0	0
	285	0	0	0	0	0	0	0	0	0	0	0	0	0	0	0	0	0	0	0	0									285	0	0	0	0	0	0	0	0	0	0	0	0	0	0	0	0	0	0	0
	286	0	0	0	0	0	0	0	0	0	0	0	0	0	0	0	0	0	0	0	0									286	0	0	0	0	0	0	0	0	0	0	0	0	0	0	0	0	0	0	0
	287	0	0	0	0	0	0	0	0	0	0	0	0	0	0	0	0	0	0	0	0									287	0	0	0	0	0	0	0	0	0	0	0	0	0	0	0	0	0	0	0
	288	0	0	0	0	0	0	0	0	0	0	0	0	0	0	0	0	0	0	0	0									288	0	0	0	0	0	0	0	0	0	0	0	0	0	0	0	0	0	0	0
	289	0	0	0	0	0	0	0	0	0	0	0	0	0	0	0	0	0	0	0	0									289	0	0	0	0	0	0	0	0	0	0	0	0	0	0	0	0	0	0	0
	290	0	0	0	0	0	0	0	0	0	0	0	0	0	0	0	0	0	0	0	0									290	0	0	0	0	0	0	0	0	0	0	0	0	0	0	0	0	0	0	0
	291	0	0	0	0	0	0	0	0	0	0	0	0	0	0	0	0	0	0	0	0									291	0	0	0	0	0	0	0	0	0	0	0	0	0	0	0	0	0	0	0
	292	0	0	0	0	0	0	0	0	0	0	0	0	0	0	0	0	0	0	0	0									292	0	0	0	0	0	0	0	0	0	0	0	0	0	0	0	0	0	0	0
	293	0	0	0	0	0	0	0	0	0	0	0	0	0	0	0	0	0	0	0	0									293	0	0	0	0	0	0	0	0	0	0	0	0	0	0	0	0	0	0	0
	294	0	0	0	0	0	0	0	0	0	0	0	0	0	0	0	0	0	0	0	0									294	0	0	0	0	0	0	0	0	0	0	0	0	0	0	0	0	0	0	0
	295	0	0	0	0	0	0	0	0	0	0	0	0	0	0	0	0	0	0	0	0									295	0	0	0	0	0	0	0	0	0	0	0	0	0	0	0	0	0	0	0
	296	0	0	0	0	0	0	0	0	0	0	0	0	0	0	0	0	0	0	0	0									296	0	0	0	0	0	0	0	0	0	0	0	0	0	0	0	0	0	0	0
	297	0	0	0	0	0	0	0	0	0	0	0	0	0	0	0	0	0	0	0	0									297	0	0	0	0	0	0	0	0	0	0	0	0	0	0	0	0	0	0	0
	298	0	0	0	0	0	0	0	0	0	0	0	0	0	0	0	0	0	0	0	0									298	0	0	0	0	0	0	0	0	0	0	0	0	0	0	0	0	0	0	0
	299	0	0	0	0	0	0	0	0	0	0	0	0	0	0	0	0	0	0	0	0									299	0	0	0	0	0	0	0	0	0	0	0	0	0	0	0	0	0	0	0
	300	0	0	0	0	0	0	0	0	0	0	0	0	0	0	0	0	0	0	0	0									300	0	0	0	0	0	0	0	0	0	0	0	0	0	0	0	0	0	0	0
	301	0	0	0	0	0	0	0	0	0	0	0	0	0	0	0	0	0	0	0	0									301	0	0	0	0	0	0	0	0	0	0	0	0	0	0	0	0	0	0	0
	302	0	0	0	0	0	0	0	0	0	0	0	0	0	0	0	0	0	0	0	0									302	0	0	0	0	0	0	0	0	0	0	0	0	0	0	0	0	0	0	0
	303	0	0	0	0	0	0	0	0	0	0	0	0	0	0	0	0	0	0	0	0									303	0	0	0	0	0	0	0	0	0	0	0	0	0	0	0	0	0	0	0
	304	0	0	0	0	0	0	0	0	0	0	0	0	0	0	0	0	0	0	0	0									304	0	0	0	0	0	0	0	0	0	0	0	0	0	0	0	0	0	0	0
	305	0	0	0	0	0	0	0	0	0	0	0	0	0	0	0	0	0	0	0	0									305	0	0	0	0	0	0	0	0	0	0	0	0	0	0	0	0	0	0	0
	306	0	0	0	0	0	0	0	0	0	0	0	0	0	0	0	0	0	0	0	0									306	0	0	0	0	0	0	0	0	0	0	0	0	0	0	0	0	0	0	0
	307	0	0	0	0	0	0	0	0	0	0	0	0	0	0	0	0	0	0	0	0									307	0	0	0	0	0	0	0	0	0	0	0	0	0	0	0	0	0	0	0
	308	0	0	0	0	0	0	0	0	0	0	0	0	0	0	0	0	0	0	0	0									308	0	0	0	0	0	0	0	0	0	0	0	0	0	0	0	0	0	0	0
	309	0	0	0	0	0	0	0	0	0	0	0	0	0	0	0	0	0	0	0	0									309	0	0	0	0	0	0	0	0	0	0	0	0	0	0	0	0	0	0	0
	310	0	0	0	0	0	0	0	0	0	0	0	0	0	0	0	0	0	0	0	0									310	0	0	0	0	0	0	0	0	0	0	0	0	0	0	0	0	0	0	0
	311	0	0	0	0	0	0	0	0	0	0	0	0	0	0	0	0	0	0	0	0									311	0	0	0	0	0	0	0	0	0	0	0	0	0	0	0	0	0	0	0
	312	0	0	0	0	0	0	0	0	0	0	0	0	0	0	0	0	0	0	0	0									312	0	0	0	0	0	0	0	0	0	0	0	0	0	0	0	0	0	0	0
	313	0	0	0	0	0	0	0	0	0	0	0	0	0	0	0	0	0	0	0	0									313	0	0	0	0	0	0	0	0	0	0	0	0	0	0	0	0	0	0	0
	314	0	0	0	0	0	0	0	0	0	0	0	0	0	0	0	0	0	0	0	0									314	0	0	0	0	0	0	0	0	0	0	0	0	0	0	0	0	0	0	0
	315	0	0	0	0	0	0	0	0	0	0	0	0	0	0	0	0	0	0	0	0									315	0	0	0	0	0	0	0	0	0	0	0	0	0	0	0	0	0	0	0
	316	0	0	0	0	0	0	0	0	0	0	0	0	0	0	0	0	0	0	0	0									316	0	0	0	0	0	0	0	0	0	0	0	0	0	0	0	0	0	0	0
	317	0	0	0	0	0	0	0	0	0	0	0	0	0	0	0	0	0	0	0	0									317	0	0	0	0	0	0	0	0	0	0	0	0	0	0	0	0	0	0	0
	318	0	0	0	0	0	0	0	0	0	0	0	0	0	0	0	0	0	0	0	0									318	0	0	0	0	0	0	0	0	0	0	0	0	0	0	0	0	0	0	0
	319	0	0	0	0	0	0	0	0	0	0	0	0	0	0	0	0	0	0	0	0									319	0	0	0	0	0	0	0	0	0	0	0	0	0	0	0	0	0	0	0
	320	0	0	0	0	0	0	0	0	0	0	0	0	0	0	0	0	0	0	0	0									320	0	0	0	0	0	0	0	0	0	0	0	0	0	0	0	0	0	0	0
	321	0	0	0	0	0	0	0	0	0	0	0	0	0	0	0	0	0	0	0	0									321	0	0	0	0	0	0	0	0	0	0	0	0	0	0	0	0	0	0	0
	322	0	0	0	0	0	0	0	0	0	0	0	0	0	0	0	0	0	0	0	0									322	0	0	0	0	0	0	0	0	0	0	0	0	0	0	0	0	0	0	0
	323	0	0	0	0	0	0	0	0	0	0	0	0	0	0	0	0	0	0	0	0									323	0	0	0	0	0	0	0	0	0	0	0	0	0	0	0	0	0	0	0
	324	0	0	0	0	0	0	0	0	0	0	0	0	0	0	0	0	0	0	0	0									324	0	0	0	0	0	0	0	0	0	0	0	0	0	0	0	0	0	0	0
	325	0	0	0	0	0	0	0	0	0	0	0	0	0	0	0	0	0	0	0	0									325	0	0	0	0	0	0	0	0	0	0	0	0	0	0	0	0	0	0	0
	326	0	0	0	0	0	0	0	0	0	0	0	0	0	0	0	0	0	0	0	0									326	0	0	0	0	0	0	0	0	0	0	0	0	0	0	0	0	0	0	0
	327	0	0	0	0	0	0	0	0	0	0	0	0	0	0	0	0	0	0	0	0									327	0	0	0	0	0	0	0	0	0	0	0	0	0	0	0	0	0	0	0
	328	0	0	0	0	0	0	0	0	0	0	0	0	0	0	0	0	0	0	0	0									328	0	0	0	0	0	0	0	0	0	0	0	0	0	0	0	0	0	0	0
	329	0	0	0	0	0	0	0	0	0	0	0	0	0	0	0	0	0	0	0	0									329	0	0	0	0	0	0	0	0	0	0	0	0	0	0	0	0	0	0	0
	330	0	0	0	0	0	0	0	0	0	0	0	0	0	0	0	0	0	0	0	0									330	0	0	0	0	0	0	0	0	0	0	0	0	0	0	0	0	0	0	0
	331	0	0	0	0	0	0	0	0	0	0	0	0	0	0	0	0	0	0	0	0									331	0	0	0	0	0	0	0	0	0	0	0	0	0	0	0	0	0	0	0
	332	0	0	0	0	0	0	0	0	0	0	0	0	0	0	0	0	0	0	0	0									332	0	0	0	0	0	0	0	0	0	0	0	0	0	0	0	0	0	0	0
	333	0	0	0	0	0	0	0	0	0	0	0	0	0	0	0	0	0	0	0	0									333	0	0	0	0	0	0	0	0	0	0	0	0	0	0	0	0	0	0	0
	334	0	0	0	0	0	0	0	0	0	0	0	0	0	0	0	0	0	0	0	0									334	0	0	0	0	0	0	0	0	0	0	0	0	0	0	0	0	0	0	0
	335	0	0	0	0	0	0	0	0	0	0	0	0	0	0	0	0	0	0	0	0									335	0	0	0	0	0	0	0	0	0	0	0	0	0	0	0	0	0	0	0
	336	0	0	0	0	0	0	0	0	0	0	0	0	0	0	0	0	0	0	0	0									336	0	0	0	0	0	0	0	0	0	0	0	0	0	0	0	0	0	0	0
	337	0	0	0	0	0	0	0	0	0	0	0	0	0	0	0	0	0	0	0	0									337	0	0	0	0	0	0	0	0	0	0	0	0	0	0	0	0	0	0	0
	338	0	0	0	0	0	0	0	0	0	0	0	0	0	0	0	0	0	0	0	0									338	0	0	0	0	0	0	0	0	0	0	0	0	0	0	0	0	0	0	0
	339	0	0	0	0	0	0	0	0	0	0	0	0	0	0	0	0	0	0	0	0									339	0	0	0	0	0	0	0	0	0	0	0	0	0	0	0	0	0	0	0
	340	0	0	0	0	0	0	0	0	0	0	0	0	0	0	0	0	0	0	0	0									340	0	0	0	0	0	0	0	0	0	0	0	0	0	0	0	0	0	0	0
	341	0	0	0	0	0	0	0	0	0	0	0	0	0	0	0	0	0	0	0	0									341	0	0	0	0	0	0	0	0	0	0	0	0	0	0	0	0	0	0	0
	342	0	0	0	0	0	0	0	0	0	0	0	0	0	0	0	0	0	0	0	0									342	0	0	0	0	0	0	0	0	0	0	0	0	0	0	0	0	0	0	0
	343	0	0	0	0	0	0	0	0	0	0	0	0	0	0	0	0	0	0	0	0									343	0	0	0	0	0	0	0	0	0	0	0	0	0	0	0	0	0	0	0
	344	0	0	0	0	0	0	0	0	0	0	0	0	0	0	0	0	0	0	0	0									344	0	0	0	0	0	0	0	0	0	0	0	0	0	0	0	0	0	0	0
	345	0	0	0	0	0	0	0	0	0	0	0	0	0	0	0	0	0	0	0	0									345	0	0	0	0	0	0	0	0	0	0	0	0	0	0	0	0	0	0	0
	346	0	0	0	0	0	0	0	0	0	0	0	0	0	0	0	0	0	0	0	0									346	0	0	0	0	0	0	0	0	0	0	0	0	0	0	0	0	0	0	0
	347	0	0	0	0	0	0	0	0	0	0	0	0	0	0	0	0	0	0	0	0									347	0	0	0	0	0	0	0	0	0	0	0	0	0	0	0	0	0	0	0
	348	0	0	0	0	0	0	0	0	0	0	0	0	0	0	0	0	0	0	0	0									348	0	0	0	0	0	0	0	0	0	0	0	0	0	0	0	0	0	0	0
	349	0	0	0	0	0	0	0	0	0	0	0	0	0	0	0	0	0	0	0	0									349	0	0	0	0	0	0	0	0	0	0	0	0	0	0	0	0	0	0	0
	350	0	0	0	0	0	0	0	0	0	0	0	0	0	0	0	0	0	0	0	0									350	0	0	0	0	0	0	0	0	0	0	0	0	0	0	0	0	0	0	0
	351	0	0	0	0	0	0	0	0	0	0	0	0	0	0	0	0	0	0	0	0									351	0	0	0	0	0	0	0	0	0	0	0	0	0	0	0	0	0	0	0
	352	0	0	0	0	0	0	0	0	0	0	0	0	0	0	0	0	0	0	0	0									352	0	0	0	0	0	0	0	0	0	0	0	0	0	0	0	0	0	0	0
	353	0	0	0	0	0	0	0	0	0	0	0	0	0	0	0	0	0	0	0	0									353	0	0	0	0	0	0	0	0	0	0	0	0	0	0	0	0	0	0	0
	354	0	0	0	0	0	0	0	0	0	0	0	0	0	0	0	0	0	0	0	0									354	0	0	0	0	0	0	0	0	0	0	0	0	0	0	0	0	0	0	0
	355	0	0	0	0	0	0	0	0	0	0	0	0	0	0	0	0	0	0	0	0									355	0	0	0	0	0	0	0	0	0	0	0	0	0	0	0	0	0	0	0
	356	0	0	0	0	0	0	0	0	0	0	0	0	0	0	0	0	0	0	0	0									356	0	0	0	0	0	0	0	0	0	0	0	0	0	0	0	0	0	0	0
	357	0	0	0	0	0	0	0	0	0	0	0	0	0	0	0	0	0	0	0	0									357	0	0	0	0	0	0	0	0	0	0	0	0	0	0	0	0	0	0	0
	358	0	0	0	0	0	0	0	0	0	0	0	0	0	0	0	0	0	0	0	0									358	0	0	0	0	0	0	0	0	0	0	0	0	0	0	0	0	0	0	0
	359	0	0	0	0	0	0	0	0	0	0	0	0	0	0	0	0	0	0	0	0									359	0	0	0	0	0	0	0	0	0	0	0	0	0	0	0	0	0	0	0
	360	0	0	0	0	0	0	0	0	0	0	0	0	0	0	0	0	0	0	0	0									360	0	0	0	0	0	0	0	0	0	0	0	0	0	0	0	0	0	0	0
	361	0	0	0	0	0	0	0	0	0	0	0	0	0	0	0	0	0	0	0	0									361	0	0	0	0	0	0	0	0	0	0	0	0	0	0	0	0	0	0	0
	362	0	0	0	0	0	0	0	0	0	0	0	0	0	0	0	0	0	0	0	0									362	0	0	0	0	0	0	0	0	0	0	0	0	0	0	0	0	0	0	0
	363	0	0	0	0	0	0	0	0	0	0	0	0	0	0	0	0	0	0	0	0									363	0	0	0	0	0	0	0	0	0	0	0	0	0	0	0	0	0	0	0
	364	0	0	0	0	0	0	0	0	0	0	0	0	0	0	0	0	0	0	0	0									364	0	0	0	0	0	0	0	0	0	0	0	0	0	0	0	0	0	0	0
	365	0	0	0	0	0	0	0	0	0	0	0	0	0	0	0	0	0	0	0	0									365	0	0	0	0	0	0	0	0	0	0	0	0	0	0	0	0	0	0	0
	366	0	0	0	0	0	0	0	0	0	0	0	0	0	0	0	0	0	0	0	0									366	0	0	0	0	0	0	0	0	0	0	0	0	0	0	0	0	0	0	0
	367	0	0	0	0	0	0	0	0	0	0	0	0	0	0	0	0	0	0	0	0									367	0	0	0	0	0	0	0	0	0	0	0	0	0	0	0	0	0	0	0
	368	0	0	0	0	0	0	0	0	0	0	0	0	0	0	0	0	0	0	0	0									368	0	0	0	0	0	0	0	0	0	0	0	0	0	0	0	0	0	0	0
	369	0	0	0	0	0	0	0	0	0	0	0	0	0	0	0	0	0	0	0	0									369	0	0	0	0	0	0	0	0	0	0	0	0	0	0	0	0	0	0	0
	370	0	0	0	0	0	0	0	0	0	0	0	0	0	0	0	0	0	0	0	0									370	0	0	0	0	0	0	0	0	0	0	0	0	0	0	0	0	0	0	0
	371	0	0	0	0	0	0	0	0	0	0	0	0	0	0	0	0	0	0	0	0									371	0	0	0	0	0	0	0	0	0	0	0	0	0	0	0	0	0	0	0
	372	0	0	0	0	0	0	0	0	0	0	0	0	0	0	0	0	0	0	0	0									372	0	0	0	0	0	0	0	0	0	0	0	0	0	0	0	0	0	0	0
	373	0	0	0	0	0	0	0	0	0	0	0	0	0	0	0	0	0	0	0	0									373	0	0	0	0	0	0	0	0	0	0	0	0	0	0	0	0	0	0	0
	374	0	0	0	0	0	0	0	0	0	0	0	0	0	0	0	0	0	0	0	0									374	0	0	0	0	0	0	0	0	0	0	0	0	0	0	0	0	0	0	0
	375	0	0	0	0	0	0	0	0	0	0	0	0	0	0	0	0	0	0	0	0									375	0	0	0	0	0	0	0	0	0	0	0	0	0	0	0	0	0	0	0
	376	0	0	0	0	0	0	0	0	0	0	0	0	0	0	0	0	0	0	0	0									376	0	0	0	0	0	0	0	0	0	0	0	0	0	0	0	0	0	0	0
	377	0	0	0	0	0	0	0	0	0	0	0	0	0	0	0	0	0	0	0	0									377	0	0	0	0	0	0	0	0	0	0	0	0	0	0	0	0	0	0	0
	378	0	0	0	0	0	0	0	0	0	0	0	0	0	0	0	0	0	0	0	0									378	0	0	0	0	0	0	0	0	0	0	0	0	0	0	0	0	0	0	0
	379	0	0	0	0	0	0	0	0	0	0	0	0	0	0	0	0	0	0	0	0									379	0	0	0	0	0	0	0	0	0	0	0	0	0	0	0	0	0	0	0
	380	0	0	0	0	0	0	0	0	0	0	0	0	0	0	0	0	0	0	0	0									380	0	0	0	0	0	0	0	0	0	0	0	0	0	0	0	0	0	0	0
	381	0	0	0	0	0	0	0	0	0	0	0	0	0	0	0	0	0	0	0	0									381	0	0	0	0	0	0	0	0	0	0	0	0	0	0	0	0	0	0	0
	382	0	0	0	0	0	0	0	0	0	0	0	0	0	0	0	0	0	0	0	0									382	0	0	0	0	0	0	0	0	0	0	0	0	0	0	0	0	0	0	0
	383	0	0	0	0	0	0	0	0	0	0	0	0	0	0	0	0	0	0	0	0									383	0	0	0	0	0	0	0	0	0	0	0	0	0	0	0	0	0	0	0
	384	0	0	0	0	0	0	0	0	0	0	0	0	0	0	0	0	0	0	0	0									384	0	0	0	0	0	0	0	0	0	0	0	0	0	0	0	0	0	0	0
	385	0	0	0	0	0	0	0	0	0	0	0	0	0	0	0	0	0	0	0	0									385	0	0	0	0	0	0	0	0	0	0	0	0	0	0	0	0	0	0	0
	386	0	0	0	0	0	0	0	0	0	0	0	0	0	0	0	0	0	0	0	0									386	0	0	0	0	0	0	0	0	0	0	0	0	0	0	0	0	0	0	0
	387	0	0	0	0	0	0	0	0	0	0	0	0	0	0	0	0	0	0	0	0									387	0	0	0	0	0	0	0	0	0	0	0	0	0	0	0	0	0	0	0
	388	0	0	0	0	0	0	0	0	0	0	0	0	0	0	0	0	0	0	0	0									388	0	0	0	0	0	0	0	0	0	0	0	0	0	0	0	0	0	0	0
	389	0	0	0	0	0	0	0	0	0	0	0	0	0	0	0	0	0	0	0	0									389	0	0	0	0	0	0	0	0	0	0	0	0	0	0	0	0	0	0	0
	390	0	0	0	0	0	0	0	0	0	0	0	0	0	0	0	0	0	0	0	0									390	0	0	0	0	0	0	0	0	0	0	0	0	0	0	0	0	0	0	0
	391	0	0	0	0	0	0	0	0	0	0	0	0	0	0	0	0	0	0	0	0									391	0	0	0	0	0	0	0	0	0	0	0	0	0	0	0	0	0	0	0
	392	0	0	0	0	0	0	0	0	0	0	0	0	0	0	0	0	0	0	0	0									392	0	0	0	0	0	0	0	0	0	0	0	0	0	0	0	0	0	0	0
	393	0	0	0	0	0	0	0	0	0	0	0	0	0	0	0	0	0	0	0	0									393	0	0	0	0	0	0	0	0	0	0	0	0	0	0	0	0	0	0	0
	394	0	0	0	0	0	0	0	0	0	0	0	0	0	0	0	0	0	0	0	0									394	0	0	0	0	0	0	0	0	0	0	0	0	0	0	0	0	0	0	0
	395	0	0	0	0	0	0	0	0	0	0	0	0	0	0	0	0	0	0	0	0									395	0	0	0	0	0	0	0	0	0	0	0	0	0	0	0	0	0	0	0
	396	0	0	0	0	0	0	0	0	0	0	0	0	0	0	0	0	0	0	0	0									396	0	0	0	0	0	0	0	0	0	0	0	0	0	0	0	0	0	0	0
	397	0	0	0	0	0	0	0	0	0	0	0	0	0	0	0	0	0	0	0	0									397	0	0	0	0	0	0	0	0	0	0	0	0	0	0	0	0	0	0	0
	398	0	0	0	0	0	0	0	0	0	0	0	0	0	0	0	0	0	0	0	0									398	0	0	0	0	0	0	0	0	0	0	0	0	0	0	0	0	0	0	0
	399	0	0	0	0	0	0	0	0	0	0	0	0	0	0	0	0	0	0	0	0									399	0	0	0	0	0	0	0	0	0	0	0	0	0	0	0	0	0	0	0
	400	0	0	0	0	0	0	0	0	0	0	0	0	0	0	0	0	0	0	0	0									400	0	0	0	0	0	0	0	0	0	0	0	0	0	0	0	0	0	0	0
	401	0	0	0	0	0	0	0	0	0	0	0	0	0	0	0	0	0	0	0	0									401	0	0	0	0	0	0	0	0	0	0	0	0	0	0	0	0	0	0	0
	402	0	0	0	0	0	0	0	0	0	0	0	0	0	0	0	0	0	0	0	0									402	0	0	0	0	0	0	0	0	0	0	0	0	0	0	0	0	0	0	0
	403	0	0	0	0	0	0	0	0	0	0	0	0	0	0	0	0	0	0	0	0									403	0	0	0	0	0	0	0	0	0	0	0	0	0	0	0	0	0	0	0
	404	0	0	0	0	0	0	0	0	0	0	0	0	0	0	0	0	0	0	0	0									404	0	0	0	0	0	0	0	0	0	0	0	0	0	0	0	0	0	0	0
	405	0	0	0	0	0	0	0	0	0	0	0	0	0	0	0	0	0	0	0	0									405	0	0	0	0	0	0	0	0	0	0	0	0	0	0	0	0	0	0	0
	406	0	0	0	0	0	0	0	0	0	0	0	0	0	0	0	0	0	0	0	0									406	0	0	0	0	0	0	0	0	0	0	0	0	0	0	0	0	0	0	0
	407	0	0	0	0	0	0	0	0	0	0	0	0	0	0	0	0	0	0	0	0									407	0	0	0	0	0	0	0	0	0	0	0	0	0	0	0	0	0	0	0
	408	0	0	0	0	0	0	0	0	0	0	0	0	0	0	0	0	0	0	0	0									408	0	0	0	0	0	0	0	0	0	0	0	0	0	0	0	0	0	0	0
	409	0	0	0	0	0	0	0	0	0	0	0	0	0	0	0	0	0	0	0	0									409	0	0	0	0	0	0	0	0	0	0	0	0	0	0	0	0	0	0	0
	410	0	0	0	0	0	0	0	0	0	0	0	0	0	0	0	0	0	0	0	0									410	0	0	0	0	0	0	0	0	0	0	0	0	0	0	0	0	0	0	0
	411	0	0	0	0	0	0	0	0	0	0	0	0	0	0	0	0	0	0	0	0									411	0	0	0	0	0	0	0	0	0	0	0	0	0	0	0	0	0	0	0
	412	0	0	0	0	0	0	0	0	0	0	0	0	0	0	0	0	0	0	0	0									412	0	0	0	0	0	0	0	0	0	0	0	0	0	0	0	0	0	0	0
	413	0	0	0	0	0	0	0	0	0	0	0	0	0	0	0	0	0	0	0	0									413	0	0	0	0	0	0	0	0	0	0	0	0	0	0	0	0	0	0	0
	414	0	0	0	0	0	0	0	0	0	0	0	0	0	0	0	0	0	0	0	0									414	0	0	0	0	0	0	0	0	0	0	0	0	0	0	0	0	0	0	0
	415	0	0	0	0	0	0	0	0	0	0	0	0	0	0	0	0	0	0	0	0									415	0	0	0	0	0	0	0	0	0	0	0	0	0	0	0	0	0	0	0
	416	0	0	0	0	0	0	0	0	0	0	0	0	0	0	0	0	0	0	0	0									416	0	0	0	0	0	0	0	0	0	0	0	0	0	0	0	0	0	0	0
	417	0	0	0	0	0	0	0	0	0	0	0	0	0	0	0	0	0	0	0	0									417	0	0	0	0	0	0	0	0	0	0	0	0	0	0	0	0	0	0	0
	418	0	0	0	0	0	0	0	0	0	0	0	0	0	0	0	0	0	0	0	0									418	0	0	0	0	0	0	0	0	0	0	0	0	0	0	0	0	0	0	0
	419	0	0	0	0	0	0	0	0	0	0	0	0	0	0	0	0	0	0	0	0									419	0	0	0	0	0	0	0	0	0	0	0	0	0	0	0	0	0	0	0
	420	0	0	0	0	0	0	0	0	0	0	0	0	0	0	0	0	0	0	0	0									420	0	0	0	0	0	0	0	0	0	0	0	0	0	0	0	0	0	0	0
	421	0	0	0	0	0	0	0	0	0	0	0	0	0	0	0	0	0	0	0	0									421	0	0	0	0	0	0	0	0	0	0	0	0	0	0	0	0	0	0	0
	422	0	0	0	0	0	0	0	0	0	0	0	0	0	0	0	0	0	0	0	0									422	0	0	0	0	0	0	0	0	0	0	0	0	0	0	0	0	0	0	0
	423	0	0	0	0	0	0	0	0	0	0	0	0	0	0	0	0	0	0	0	0									423	0	0	0	0	0	0	0	0	0	0	0	0	0	0	0	0	0	0	0
	424	0	0	0	0	0	0	0	0	0	0	0	0	0	0	0	0	0	0	0	0									424	0	0	0	0	0	0	0	0	0	0	0	0	0	0	0	0	0	0	0
	425	0	0	0	0	0	0	0	0	0	0	0	0	0	0	0	0	0	0	0	0									425	0	0	0	0	0	0	0	0	0	0	0	0	0	0	0	0	0	0	0
	426	0	0	0	0	0	0	0	0	0	0	0	0	0	0	0	0	0	0	0	0									426	0	0	0	0	0	0	0	0	0	0	0	0	0	0	0	0	0	0	0
	427	0	0	0	0	0	0	0	0	0	0	0	0	0	0	0	0	0	0	0	0									427	0	0	0	0	0	0	0	0	0	0	0	0	0	0	0	0	0	0	0
	428	0	0	0	0	0	0	0	0	0	0	0	0	0	0	0	0	0	0	0	0									428	0	0	0	0	0	0	0	0	0	0	0	0	0	0	0	0	0	0	0
	429	0	0	0	0	0	0	0	0	0	0	0	0	0	0	0	0	0	0	0	0									429	0	0	0	0	0	0	0	0	0	0	0	0	0	0	0	0	0	0	0
	430	0	0	0	0	0	0	0	0	0	0	0	0	0	0	0	0	0	0	0	0									430	0	0	0	0	0	0	0	0	0	0	0	0	0	0	0	0	0	0	0
	431	0	0	0	0	0	0	0	0	0	0	0	0	0	0	0	0	0	0	0	0									431	0	0	0	0	0	0	0	0	0	0	0	0	0	0	0	0	0	0	0
	432	0	0	0	0	0	0	0	0	0	0	0	0	0	0	0	0	0	0	0	0									432	0	0	0	0	0	0	0	0	0	0	0	0	0	0	0	0	0	0	0
	433	0	0	0	0	0	0	0	0	0	0	0	0	0	0	0	0	0	0	0	0									433	0	0	0	0	0	0	0	0	0	0	0	0	0	0	0	0	0	0	0
	434	0	0	0	0	0	0	0	0	0	0	0	0	0	0	0	0	0	0	0	0									434	0	0	0	0	0	0	0	0	0	0	0	0	0	0	0	0	0	0	0
	435	0	0	0	0	0	0	0	0	0	0	0	0	0	0	0	0	0	0	0	0									435	0	0	0	0	0	0	0	0	0	0	0	0	0	0	0	0	0	0	0
	436	0	0	0	0	0	0	0	0	0	0	0	0	0	0	0	0	0	0	0	0									436	0	0	0	0	0	0	0	0	0	0	0	0	0	0	0	0	0	0	0
	437	0	0	0	0	0	0	0	0	0	0	0	0	0	0	0	0	0	0	0	0									437	0	0	0	0	0	0	0	0	0	0	0	0	0	0	0	0	0	0	0
	438	0	0	0	0	0	0	0	0	0	0	0	0	0	0	0	0	0	0	0	0									438	0	0	0	0	0	0	0	0	0	0	0	0	0	0	0	0	0	0	0
	439	0	0	0	0	0	0	0	0	0	0	0	0	0	0	0	0	0	0	0	0									439	0	0	0	0	0	0	0	0	0	0	0	0	0	0	0	0	0	0	0
	440	0	0	0	0	0	0	0	0	0	0	0	0	0	0	0	0	0	0	0	0									440	0	0	0	0	0	0	0	0	0	0	0	0	0	0	0	0	0	0	0
	441	0	0	0	0	0	0	0	0	0	0	0	0	0	0	0	0	0	0	0	0									441	0	0	0	0	0	0	0	0	0	0	0	0	0	0	0	0	0	0	0
	442	0	0	0	0	0	0	0	0	0	0	0	0	0	0	0	0	0	0	0	0									442	0	0	0	0	0	0	0	0	0	0	0	0	0	0	0	0	0	0	0
	443	0	0	0	0	0	0	0	0	0	0	0	0	0	0	0	0	0	0	0	0									443	0	0	0	0	0	0	0	0	0	0	0	0	0	0	0	0	0	0	0
	444	0	0	0	0	0	0	0	0	0	0	0	0	0	0	0	0	0	0	0	0									444	0	0	0	0	0	0	0	0	0	0	0	0	0	0	0	0	0	0	0
	445	0	0	0	0	0	0	0	0	0	0	0	0	0	0	0	0	0	0	0	0									445	0	0	0	0	0	0	0	0	0	0	0	0	0	0	0	0	0	0	0
	446	0	0	0	0	0	0	0	0	0	0	0	0	0	0	0	0	0	0	0	0									446	0	0	0	0	0	0	0	0	0	0	0	0	0	0	0	0	0	0	0
	447	0	0	0	0	0	0	0	0	0	0	0	0	0	0	0	0	0	0	0	0									447	0	0	0	0	0	0	0	0	0	0	0	0	0	0	0	0	0	0	0
	448	0	0	0	0	0	0	0	0	0	0	0	0	0	0	0	0	0	0	0	0									448	0	0	0	0	0	0	0	0	0	0	0	0	0	0	0	0	0	0	0
	449	0	0	0	0	0	0	0	0	0	0	0	0	0	0	0	0	0	0	0	0									449	0	0	0	0	0	0	0	0	0	0	0	0	0	0	0	0	0	0	0
	450	0	0	0	0	0	0	0	0	0	0	0	0	0	0	0	0	0	0	0	0									450	0	0	0	0	0	0	0	0	0	0	0	0	0	0	0	0	0	0	0
	451	0	0	0	0	0	0	0	0	0	0	0	0	0	0	0	0	0	0	0	0									451	0	0	0	0	0	0	0	0	0	0	0	0	0	0	0	0	0	0	0
	452	0	0	0	0	0	0	0	0	0	0	0	0	0	0	0	0	0	0	0	0									452	0	0	0	0	0	0	0	0	0	0	0	0	0	0	0	0	0	0	0
	453	0	0	0	0	0	0	0	0	0	0	0	0	0	0	0	0	0	0	0	0									453	0	0	0	0	0	0	0	0	0	0	0	0	0	0	0	0	0	0	0
	454	0	0	0	0	0	0	0	0	0	0	0	0	0	0	0	0	0	0	0	0									454	0	0	0	0	0	0	0	0	0	0	0	0	0	0	0	0	0	0	0
	455	0	0	0	0	0	0	0	0	0	0	0	0	0	0	0	0	0	0	0	0									455	0	0	0	0	0	0	0	0	0	0	0	0	0	0	0	0	0	0	0
	456	0	0	0	0	0	0	0	0	0	0	0	0	0	0	0	0	0	0	0	0									456	0	0	0	0	0	0	0	0	0	0	0	0	0	0	0	0	0	0	0
	457	0	0	0	0	0	0	0	0	0	0	0	0	0	0	0	0	0	0	0	0									457	0	0	0	0	0	0	0	0	0	0	0	0	0	0	0	0	0	0	0
	458	0	0	0	0	0	0	0	0	0	0	0	0	0	0	0	0	0	0	0	0									458	0	0	0	0	0	0	0	0	0	0	0	0	0	0	0	0	0	0	0
	459	0	0	0	0	0	0	0	0	0	0	0	0	0	0	0	0	0	0	0	0									459	0	0	0	0	0	0	0	0	0	0	0	0	0	0	0	0	0	0	0
	460	0	0	0	0	0	0	0	0	0	0	0	0	0	0	0	0	0	0	0	0									460	0	0	0	0	0	0	0	0	0	0	0	0	0	0	0	0	0	0	0
	461	0	0	0	0	0	0	0	0	0	0	0	0	0	0	0	0	0	0	0	0									461	0	0	0	0	0	0	0	0	0	0	0	0	0	0	0	0	0	0	0
	462	0	0	0	0	0	0	0	0	0	0	0	0	0	0	0	0	0	0	0	0									462	0	0	0	0	0	0	0	0	0	0	0	0	0	0	0	0	0	0	0
	463	0	0	0	0	0	0	0	0	0	0	0	0	0	0	0	0	0	0	0	0									463	0	0	0	0	0	0	0	0	0	0	0	0	0	0	0	0	0	0	0
	464	0	0	0	0	0	0	0	0	0	0	0	0	0	0	0	0	0	0	0	0									464	0	0	0	0	0	0	0	0	0	0	0	0	0	0	0	0	0	0	0
	465	0	0	0	0	0	0	0	0	0	0	0	0	0	0	0	0	0	0	0	0									465	0	0	0	0	0	0	0	0	0	0	0	0	0	0	0	0	0	0	0
	466	0	0	0	0	0	0	0	0	0	0	0	0	0	0	0	0	0	0	0	0									466	0	0	0	0	0	0	0	0	0	0	0	0	0	0	0	0	0	0	0
	467	0	0	0	0	0	0	0	0	0	0	0	0	0	0	0	0	0	0	0	0									467	0	0	0	0	0	0	0	0	0	0	0	0	0	0	0	0	0	0	0
	468	0	0	0	0	0	0	0	0	0	0	0	0	0	0	0	0	0	0	0	0									468	0	0	0	0	0	0	0	0	0	0	0	0	0	0	0	0	0	0	0
	469	0	0	0	0	0	0	0	0	0	0	0	0	0	0	0	0	0	0	0	0									469	0	0	0	0	0	0	0	0	0	0	0	0	0	0	0	0	0	0	0
	470	0	0	0	0	0	0	0	0	0	0	0	0	0	0	0	0	0	0	0	0									470	0	0	0	0	0	0	0	0	0	0	0	0	0	0	0	0	0	0	0
	471	0	0	0	0	0	0	0	0	0	0	0	0	0	0	0	0	0	0	0	0									471	0	0	0	0	0	0	0	0	0	0	0	0	0	0	0	0	0	0	0
	472	0	0	0	0	0	0	0	0	0	0	0	0	0	0	0	0	0	0	0	0									472	0	0	0	0	0	0	0	0	0	0	0	0	0	0	0	0	0	0	0
	473	0	0	0	0	0	0	0	0	0	0	0	0	0	0	0	0	0	0	0	0									473	0	0	0	0	0	0	0	0	0	0	0	0	0	0	0	0	0	0	0
	474	0	0	0	0	0	0	0	0	0	0	0	0	0	0	0	0	0	0	0	0									474	0	0	0	0	0	0	0	0	0	0	0	0	0	0	0	0	0	0	0
	475	0	0	0	0	0	0	0	0	0	0	0	0	0	0	0	0	0	0	0	0									475	0	0	0	0	0	0	0	0	0	0	0	0	0	0	0	0	0	0	0
	476	0	0	0	0	0	0	0	0	0	0	0	0	0	0	0	0	0	0	0	0									476	0	0	0	0	0	0	0	0	0	0	0	0	0	0	0	0	0	0	0
	477	0	0	0	0	0	0	0	0	0	0	0	0	0	0	0	0	0	0	0	0									477	0	0	0	0	0	0	0	0	0	0	0	0	0	0	0	0	0	0	0
	478	0	0	0	0	0	0	0	0	0	0	0	0	0	0	0	0	0	0	0	0									478	0	0	0	0	0	0	0	0	0	0	0	0	0	0	0	0	0	0	0
	479	0	0	0	0	0	0	0	0	0	0	0	0	0	0	0	0	0	0	0	0									479	0	0	0	0	0	0	0	0	0	0	0	0	0	0	0	0	0	0	0
	480	0	0	0	0	0	0	0	0	0	0	0	0	0	0	0	0	0	0	0	0									480	0	0	0	0	0	0	0	0	0	0	0	0	0	0	0	0	0	0	0
	481	0	0	0	0	0	0	0	0	0	0	0	0	0	0	0	0	0	0	0	0									481	0	0	0	0	0	0	0	0	0	0	0	0	0	0	0	0	0	0	0
	482	0	0	0	0	0	0	0	0	0	0	0	0	0	0	0	0	0	0	0	0									482	0	0	0	0	0	0	0	0	0	0	0	0	0	0	0	0	0	0	0
	483	0	0	0	0	0	0	0	0	0	0	0	0	0	0	0	0	0	0	0	0									483	0	0	0	0	0	0	0	0	0	0	0	0	0	0	0	0	0	0	0
	484	0	0	0	0	0	0	0	0	0	0	0	0	0	0	0	0	0	0	0	0									484	0	0	0	0	0	0	0	0	0	0	0	0	0	0	0	0	0	0	0
	485	0	0	0	0	0	0	0	0	0	0	0	0	0	0	0	0	0	0	0	0									485	0	0	0	0	0	0	0	0	0	0	0	0	0	0	0	0	0	0	0
	486	0	0	0	0	0	0	0	0	0	0	0	0	0	0	0	0	0	0	0	0									486	0	0	0	0	0	0	0	0	0	0	0	0	0	0	0	0	0	0	0
	487	0	0	0	0	0	0	0	0	0	0	0	0	0	0	0	0	0	0	0	0									487	0	0	0	0	0	0	0	0	0	0	0	0	0	0	0	0	0	0	0
	488	0	0	0	0	0	0	0	0	0	0	0	0	0	0	0	0	0	0	0	0									488	0	0	0	0	0	0	0	0	0	0	0	0	0	0	0	0	0	0	0
	489	0	0	0	0	0	0	0	0	0	0	0	0	0	0	0	0	0	0	0	0									489	0	0	0	0	0	0	0	0	0	0	0	0	0	0	0	0	0	0	0
	490	0	0	0	0	0	0	0	0	0	0	0	0	0	0	0	0	0	0	0	0									490	0	0	0	0	0	0	0	0	0	0	0	0	0	0	0	0	0	0	0
	491	0	0	0	0	0	0	0	0	0	0	0	0	0	0	0	0	0	0	0	0									491	0	0	0	0	0	0	0	0	0	0	0	0	0	0	0	0	0	0	0
	492	0	0	0	0	0	0	0	0	0	0	0	0	0	0	0	0	0	0	0	0									492	0	0	0	0	0	0	0	0	0	0	0	0	0	0	0	0	0	0	0
	493	0	0	0	0	0	0	0	0	0	0	0	0	0	0	0	0	0	0	0	0									493	0	0	0	0	0	0	0	0	0	0	0	0	0	0	0	0	0	0	0
	494	0	0	0	0	0	0	0	0	0	0	0	0	0	0	0	0	0	0	0	0									494	0	0	0	0	0	0	0	0	0	0	0	0	0	0	0	0	0	0	0
	495	0	0	0	0	0	0	0	0	0	0	0	0	0	0	0	0	0	0	0	0									495	0	0	0	0	0	0	0	0	0	0	0	0	0	0	0	0	0	0	0
	496	0	0	0	0	0	0	0	0	0	0	0	0	0	0	0	0	0	0	0	0									496	0	0	0	0	0	0	0	0	0	0	0	0	0	0	0	0	0	0	0
	497	0	0	0	0	0	0	0	0	0	0	0	0	0	0	0	0	0	0	0	0									497	0	0	0	0	0	0	0	0	0	0	0	0	0	0	0	0	0	0	0
	498	0	0	0	0	0	0	0	0	0	0	0	0	0	0	0	0	0	0	0	0									498	0	0	0	0	0	0	0	0	0	0	0	0	0	0	0	0	0	0	0
	499	0	0	0	0	0	0	0	0	0	0	0	0	0	0	0	0	0	0	0	0									499	0	0	0	0	0	0	0	0	0	0	0	0	0	0	0	0	0	0	0
	500	0	0	0	0	0	0	0	0	0	0	0	0	0	0	0	0	0	0	0	0									500	0	0	0	0	0	0	0	0	0	0	0	0	0	0	0	0	0	0	0
	501	0	0	0	0	0	0	0	0	0	0	0	0	0	0	0	0	0	0	0	0									501	0	0	0	0	0	0	0	0	0	0	0	0	0	0	0	0	0	0	0
	502	0	0	0	0	0	0	0	0	0	0	0	0	0	0	0	0	0	0	0	0									502	0	0	0	0	0	0	0	0	0	0	0	0	0	0	0	0	0	0	0
	503	0	0	0	0	0	0	0	0	0	0	0	0	0	0	0	0	0	0	0	0									503	0	0	0	0	0	0	0	0	0	0	0	0	0	0	0	0	0	0	0
	504	0	0	0	0	0	0	0	0	0	0	0	0	0	0	0	0	0	0	0	0									504	0	0	0	0	0	0	0	0	0	0	0	0	0	0	0	0	0	0	0
	505	0	0	0	0	0	0	0	0	0	0	0	0	0	0	0	0	0	0	0	0									505	0	0	0	0	0	0	0	0	0	0	0	0	0	0	0	0	0	0	0
	506	0	0	0	0	0	0	0	0	0	0	0	0	0	0	0	0	0	0	0	0									506	0	0	0	0	0	0	0	0	0	0	0	0	0	0	0	0	0	0	0
	507	0	0	0	0	0	0	0	0	0	0	0	0	0	0	0	0	0	0	0	0									507	0	0	0	0	0	0	0	0	0	0	0	0	0	0	0	0	0	0	0
	508	0	0	0	0	0	0	0	0	0	0	0	0	0	0	0	0	0	0	0	0									508	0	0	0	0	0	0	0	0	0	0	0	0	0	0	0	0	0	0	0
	509	0	0	0	0	0	0	0	0	0	0	0	0	0	0	0	0	0	0	0	0									509	0	0	0	0	0	0	0	0	0	0	0	0	0	0	0	0	0	0	0
	510	0	0	0	0	0	0	0	0	0	0	0	0	0	0	0	0	0	0	0	0									510	0	0	0	0	0	0	0	0	0	0	0	0	0	0	0	0	0	0	0
	511	0	0	0	0	0	0	0	0	0	0	0	0	0	0	0	0	0	0	0	0									511	0	0	0	0	0	0	0	0	0	0	0	0	0	0	0	0	0	0	0
	512	0	0	0	0	0	0	0	0	0	0	0	0	0	0	0	0	0	0	0	0									512	0	0	0	0	0	0	0	0	0	0	0	0	0	0	0	0	0	0	0
	513	0	0	0	0	0	0	0	0	0	0	0	0	0	0	0	0	0	0	0	0									513	0	0	0	0	0	0	0	0	0	0	0	0	0	0	0	0	0	0	0
	514	0	0	0	0	0	0	0	0	0	0	0	0	0	0	0	0	0	0	0	0									514	0	0	0	0	0	0	0	0	0	0	0	0	0	0	0	0	0	0	0
	515	0	0	0	0	0	0	0	0	0	0	0	0	0	0	0	0	0	0	0	0									515	0	0	0	0	0	0	0	0	0	0	0	0	0	0	0	0	0	0	0
	516	0	0	0	0	0	0	0	0	0	0	0	0	0	0	0	0	0	0	0	0									516	0	0	0	0	0	0	0	0	0	0	0	0	0	0	0	0	0	0	0
	517	0	0	0	0	0	0	0	0	0	0	0	0	0	0	0	0	0	0	0	0									517	0	0	0	0	0	0	0	0	0	0	0	0	0	0	0	0	0	0	0
	518	0	0	0	0	0	0	0	0	0	0	0	0	0	0	0	0	0	0	0	0									518	0	0	0	0	0	0	0	0	0	0	0	0	0	0	0	0	0	0	0
	519	0	0	0	0	0	0	0	0	0	0	0	0	0	0	0	0	0	0	0	0									519	0	0	0	0	0	0	0	0	0	0	0	0	0	0	0	0	0	0	0
	520	0	0	0	0	0	0	0	0	0	0	0	0	0	0	0	0	0	0	0	0									520	0	0	0	0	0	0	0	0	0	0	0	0	0	0	0	0	0	0	0
	521	0	0	0	0	0	0	0	0	0	0	0	0	0	0	0	0	0	0	0	0									521	0	0	0	0	0	0	0	0	0	0	0	0	0	0	0	0	0	0	0
	522	0	0	0	0	0	0	0	0	0	0	0	0	0	0	0	0	0	0	0	0									522	0	0	0	0	0	0	0	0	0	0	0	0	0	0	0	0	0	0	0
	523	0	0	0	0	0	0	0	0	0	0	0	0	0	0	0	0	0	0	0	0									523	0	0	0	0	0	0	0	0	0	0	0	0	0	0	0	0	0	0	0
	524	0	0	0	0	0	0	0	0	0	0	0	0	0	0	0	0	0	0	0	0									524	0	0	0	0	0	0	0	0	0	0	0	0	0	0	0	0	0	0	0
	525	0	0	0	0	0	0	0	0	0	0	0	0	0	0	0	0	0	0	0	0									525	0	0	0	0	0	0	0	0	0	0	0	0	0	0	0	0	0	0	0
	526	0	0	0	0	0	0	0	0	0	0	0	0	0	0	0	0	0	0	0	0									526	0	0	0	0	0	0	0	0	0	0	0	0	0	0	0	0	0	0	0
	527	0	0	0	0	0	0	0	0	0	0	0	0	0	0	0	0	0	0	0	0									527	0	0	0	0	0	0	0	0	0	0	0	0	0	0	0	0	0	0	0
	528	0	0	0	0	0	0	0	0	0	0	0	0	0	0	0	0	0	0	0	0									528	0	0	0	0	0	0	0	0	0	0	0	0	0	0	0	0	0	0	0
	529	0	0	0	0	0	0	0	0	0	0	0	0	0	0	0	0	0	0	0	0									529	0	0	0	0	0	0	0	0	0	0	0	0	0	0	0	0	0	0	0
	530	0	0	0	0	0	0	0	0	0	0	0	0	0	0	0	0	0	0	0	0									530	0	0	0	0	0	0	0	0	0	0	0	0	0	0	0	0	0	0	0
	531	0	0	0	0	0	0	0	0	0	0	0	0	0	0	0	0	0	0	0	0									531	0	0	0	0	0	0	0	0	0	0	0	0	0	0	0	0	0	0	0
	532	0	0	0	0	0	0	0	0	0	0	0	0	0	0	0	0	0	0	0	0									532	0	0	0	0	0	0	0	0	0	0	0	0	0	0	0	0	0	0	0
	533	0	0	0	0	0	0	0	0	0	0	0	0	0	0	0	0	0	0	0	0									533	0	0	0	0	0	0	0	0	0	0	0	0	0	0	0	0	0	0	0
	534	0	0	0	0	0	0	0	0	0	0	0	0	0	0	0	0	0	0	0	0									534	0	0	0	0	0	0	0	0	0	0	0	0	0	0	0	0	0	0	0
	535	0	0	0	0	0	0	0	0	0	0	0	0	0	0	0	0	0	0	0	0									535	0	0	0	0	0	0	0	0	0	0	0	0	0	0	0	0	0	0	0
	536	0	0	0	0	0	0	0	0	0	0	0	0	0	0	0	0	0	0	0	0									536	0	0	0	0	0	0	0	0	0	0	0	0	0	0	0	0	0	0	0
	537	0	0	0	0	0	0	0	0	0	0	0	0	0	0	0	0	0	0	0	0									537	0	0	0	0	0	0	0	0	0	0	0	0	0	0	0	0	0	0	0
	538	0	0	0	0	0	0	0	0	0	0	0	0	0	0	0	0	0	0	0	0									538	0	0	0	0	0	0	0	0	0	0	0	0	0	0	0	0	0	0	0
	539	0	0	0	0	0	0	0	0	0	0	0	0	0	0	0	0	0	0	0	0									539	0	0	0	0	0	0	0	0	0	0	0	0	0	0	0	0	0	0	0
	540	0	0	0	0	0	0	0	0	0	0	0	0	0	0	0	0	0	0	0	0									540	0	0	0	0	0	0	0	0	0	0	0	0	0	0	0	0	0	0	0
	541	0	0	0	0	0	0	0	0	0	0	0	0	0	0	0	0	0	0	0	0									541	0	0	0	0	0	0	0	0	0	0	0	0	0	0	0	0	0	0	0
	542	0	0	0	0	0	0	0	0	0	0	0	0	0	0	0	0	0	0	0	0									542	0	0	0	0	0	0	0	0	0	0	0	0	0	0	0	0	0	0	0
	543	0	0	0	0	0	0	0	0	0	0	0	0	0	0	0	0	0	0	0	0									543	0	0	0	0	0	0	0	0	0	0	0	0	0	0	0	0	0	0	0
	544	0	0	0	0	0	0	0	0	0	0	0	0	0	0	0	0	0	0	0	0									544	0	0	0	0	0	0	0	0	0	0	0	0	0	0	0	0	0	0	0
	545	0	0	0	0	0	0	0	0	0	0	0	0	0	0	0	0	0	0	0	0									545	0	0	0	0	0	0	0	0	0	0	0	0	0	0	0	0	0	0	0
	546	0	0	0	0	0	0	0	0	0	0	0	0	0	0	0	0	0	0	0	0									546	0	0	0	0	0	0	0	0	0	0	0	0	0	0	0	0	0	0	0
	547	0	0	0	0	0	0	0	0	0	0	0	0	0	0	0	0	0	0	0	0									547	0	0	0	0	0	0	0	0	0	0	0	0	0	0	0	0	0	0	0
	548	0	0	0	0	0	0	0	0	0	0	0	0	0	0	0	0	0	0	0	0									548	0	0	0	0	0	0	0	0	0	0	0	0	0	0	0	0	0	0	0
	549	0	0	0	0	0	0	0	0	0	0	0	0	0	0	0	0	0	0	0	0									549	0	0	0	0	0	0	0	0	0	0	0	0	0	0	0	0	0	0	0
	550	0	0	0	0	0	0	0	0	0	0	0	0	0	0	0	0	0	0	0	0									550	0	0	0	0	0	0	0	0	0	0	0	0	0	0	0	0	0	0	0
	551	0	0	0	0	0	0	0	0	0	0	0	0	0	0	0	0	0	0	0	0									551	0	0	0	0	0	0	0	0	0	0	0	0	0	0	0	0	0	0	0
	552	0	0	0	0	0	0	0	0	0	0	0	0	0	0	0	0	0	0	0	0									552	0	0	0	0	0	0	0	0	0	0	0	0	0	0	0	0	0	0	0
	553	0	0	0	0	0	0	0	0	0	0	0	0	0	0	0	0	0	0	0	0									553	0	0	0	0	0	0	0	0	0	0	0	0	0	0	0	0	0	0	0
	554	0	0	0	0	0	0	0	0	0	0	0	0	0	0	0	0	0	0	0	0									554	0	0	0	0	0	0	0	0	0	0	0	0	0	0	0	0	0	0	0
	555	0	0	0	0	0	0	0	0	0	0	0	0	0	0	0	0	0	0	0	0									555	0	0	0	0	0	0	0	0	0	0	0	0	0	0	0	0	0	0	0
	556	0	0	0	0	0	0	0	0	0	0	0	0	0	0	0	0	0	0	0	0									556	0	0	0	0	0	0	0	0	0	0	0	0	0	0	0	0	0	0	0
	557	0	0	0	0	0	0	0	0	0	0	0	0	0	0	0	0	0	0	0	0									557	0	0	0	0	0	0	0	0	0	0	0	0	0	0	0	0	0	0	0
	558	0	0	0	0	0	0	0	0	0	0	0	0	0	0	0	0	0	0	0	0									558	0	0	0	0	0	0	0	0	0	0	0	0	0	0	0	0	0	0	0
	559	0	0	0	0	0	0	0	0	0	0	0	0	0	0	0	0	0	0	0	0									559	0	0	0	0	0	0	0	0	0	0	0	0	0	0	0	0	0	0	0
	560	0	0	0	0	0	0	0	0	0	0	0	0	0	0	0	0	0	0	0	0									560	0	0	0	0	0	0	0	0	0	0	0	0	0	0	0	0	0	0	0
	561	0	0	0	0	0	0	0	0	0	0	0	0	0	0	0	0	0	0	0	0									561	0	0	0	0	0	0	0	0	0	0	0	0	0	0	0	0	0	0	0
	562	0	0	0	0	0	0	0	0	0	0	0	0	0	0	0	0	0	0	0	0									562	0	0	0	0	0	0	0	0	0	0	0	0	0	0	0	0	0	0	0
	563	0	0	0	0	0	0	0	0	0	0	0	0	0	0	0	0	0	0	0	0									563	0	0	0	0	0	0	0	0	0	0	0	0	0	0	0	0	0	0	0
	564	0	0	0	0	0	0	0	0	0	0	0	0	0	0	0	0	0	0	0	0									564	0	0	0	0	0	0	0	0	0	0	0	0	0	0	0	0	0	0	0
	565	0	0	0	0	0	0	0	0	0	0	0	0	0	0	0	0	0	0	0	0									565	0	0	0	0	0	0	0	0	0	0	0	0	0	0	0	0	0	0	0
	566	0	0	0	0	0	0	0	0	0	0	0	0	0	0	0	0	0	0	0	0									566	0	0	0	0	0	0	0	0	0	0	0	0	0	0	0	0	0	0	0
	567	0	0	0	0	0	0	0	0	0	0	0	0	0	0	0	0	0	0	0	0									567	0	0	0	0	0	0	0	0	0	0	0	0	0	0	0	0	0	0	0
	568	0	0	0	0	0	0	0	0	0	0	0	0	0	0	0	0	0	0	0	0									568	0	0	0	0	0	0	0	0	0	0	0	0	0	0	0	0	0	0	0
	569	0	0	0	0	0	0	0	0	0	0	0	0	0	0	0	0	0	0	0	0									569	0	0	0	0	0	0	0	0	0	0	0	0	0	0	0	0	0	0	0
	570	0	0	0	0	0	0	0	0	0	0	0	0	0	0	0	0	0	0	0	0									570	0	0	0	0	0	0	0	0	0	0	0	0	0	0	0	0	0	0	0
	571	0	0	0	0	0	0	0	0	0	0	0	0	0	0	0	0	0	0	0	0									571	0	0	0	0	0	0	0	0	0	0	0	0	0	0	0	0	0	0	0
	572	0	0	0	0	0	0	0	0	0	0	0	0	0	0	0	0	0	0	0	0									572	0	0	0	0	0	0	0	0	0	0	0	0	0	0	0	0	0	0	0
	573	0	0	0	0	0	0	0	0	0	0	0	0	0	0	0	0	0	0	0	0									573	0	0	0	0	0	0	0	0	0	0	0	0	0	0	0	0	0	0	0
	574	0	0	0	0	0	0	0	0	0	0	0	0	0	0	0	0	0	0	0	0									574	0	0	0	0	0	0	0	0	0	0	0	0	0	0	0	0	0	0	0
	575	0	0	0	0	0	0	0	0	0	0	0	0	0	0	0	0	0	0	0	0									575	0	0	0	0	0	0	0	0	0	0	0	0	0	0	0	0	0	0	0
	576	0	0	0	0	0	0	0	0	0	0	0	0	0	0	0	0	0	0	0	0									576	0	0	0	0	0	0	0	0	0	0	0	0	0	0	0	0	0	0	0
	577	0	0	0	0	0	0	0	0	0	0	0	0	0	0	0	0	0	0	0	0									577	0	0	0	0	0	0	0	0	0	0	0	0	0	0	0	0	0	0	0
	578	0	0	0	0	0	0	0	0	0	0	0	0	0	0	0	0	0	0	0	0									578	0	0	0	0	0	0	0	0	0	0	0	0	0	0	0	0	0	0	0
	579	0	0	0	0	0	0	0	0	0	0	0	0	0	0	0	0	0	0	0	0									579	0	0	0	0	0	0	0	0	0	0	0	0	0	0	0	0	0	0	0
	580	0	0	0	0	0	0	0	0	0	0	0	0	0	0	0	0	0	0	0	0									580	0	0	0	0	0	0	0	0	0	0	0	0	0	0	0	0	0	0	0
	581	0	0	0	0	0	0	0	0	0	0	0	0	0	0	0	0	0	0	0	0									581	0	0	0	0	0	0	0	0	0	0	0	0	0	0	0	0	0	0	0
	582	0	0	0	0	0	0	0	0	0	0	0	0	0	0	0	0	0	0	0	0									582	0	0	0	0	0	0	0	0	0	0	0	0	0	0	0	0	0	0	0
	583	0	0	0	0	0	0	0	0	0	0	0	0	0	0	0	0	0	0	0	0									583	0	0	0	0	0	0	0	0	0	0	0	0	0	0	0	0	0	0	0
	584	0	0	0	0	0	0	0	0	0	0	0	0	0	0	0	0	0	0	0	0									584	0	0	0	0	0	0	0	0	0	0	0	0	0	0	0	0	0	0	0
	585	0	0	0	0	0	0	0	0	0	0	0	0	0	0	0	0	0	0	0	0									585	0	0	0	0	0	0	0	0	0	0	0	0	0	0	0	0	0	0	0
	586	0	0	0	0	0	0	0	0	0	0	0	0	0	0	0	0	0	0	0	0									586	0	0	0	0	0	0	0	0	0	0	0	0	0	0	0	0	0	0	0
	587	0	0	0	0	0	0	0	0	0	0	0	0	0	0	0	0	0	0	0	0									587	0	0	0	0	0	0	0	0	0	0	0	0	0	0	0	0	0	0	0
	588	0	0	0	0	0	0	0	0	0	0	0	0	0	0	0	0	0	0	0	0									588	0	0	0	0	0	0	0	0	0	0	0	0	0	0	0	0	0	0	0
	589	0	0	0	0	0	0	0	0	0	0	0	0	0	0	0	0	0	0	0	0									589	0	0	0	0	0	0	0	0	0	0	0	0	0	0	0	0	0	0	0
	590	0	0	0	0	0	0	0	0	0	0	0	0	0	0	0	0	0	0	0	0									590	0	0	0	0	0	0	0	0	0	0	0	0	0	0	0	0	0	0	0
	591	0	0	0	0	0	0	0	0	0	0	0	0	0	0	0	0	0	0	0	0									591	0	0	0	0	0	0	0	0	0	0	0	0	0	0	0	0	0	0	0
	592	0	0	0	0	0	0	0	0	0	0	0	0	0	0	0	0	0	0	0	0									592	0	0	0	0	0	0	0	0	0	0	0	0	0	0	0	0	0	0	0
	593	0	0	0	0	0	0	0	0	0	0	0	0	0	0	0	0	0	0	0	0									593	0	0	0	0	0	0	0	0	0	0	0	0	0	0	0	0	0	0	0
	594	0	0	0	0	0	0	0	0	0	0	0	0	0	0	0	0	0	0	0	0									594	0	0	0	0	0	0	0	0	0	0	0	0	0	0	0	0	0	0	0
	595	0	0	0	0	0	0	0	0	0	0	0	0	0	0	0	0	0	0	0	0									595	0	0	0	0	0	0	0	0	0	0	0	0	0	0	0	0	0	0	0
	596	0	0	0	0	0	0	0	0	0	0	0	0	0	0	0	0	0	0	0	0									596	0	0	0	0	0	0	0	0	0	0	0	0	0	0	0	0	0	0	0
	597	0	0	0	0	0	0	0	0	0	0	0	0	0	0	0	0	0	0	0	0									597	0	0	0	0	0	0	0	0	0	0	0	0	0	0	0	0	0	0	0
	598	0	0	0	0	0	0	0	0	0	0	0	0	0	0	0	0	0	0	0	0									598	0	0	0	0	0	0	0	0	0	0	0	0	0	0	0	0	0	0	0
	599	0	0	0	0	0	0	0	0	0	0	0	0	0	0	0	0	0	0	0	0									599	0	0	0	0	0	0	0	0	0	0	0	0	0	0	0	0	0	0	0
	600	0	0	0	0	0	0	0	0	0	0	0	0	0	0	0	0	0	0	0	0									600	0	0	0	0	0	0	0	0	0	0	0	0	0	0	0	0	0	0	0
	601	0	0	0	0	0	0	0	0	0	0	0	0	0	0	0	0	0	0	0	0									601	0	0	0	0	0	0	0	0	0	0	0	0	0	0	0	0	0	0	0
	602	0	0	0	0	0	0	0	0	0	0	0	0	0	0	0	0	0	0	0	0									602	0	0	0	0	0	0	0	0	0	0	0	0	0	0	0	0	0	0	0
	603	0	0	0	0	0	0	0	0	0	0	0	0	0	0	0	0	0	0	0	0									603	0	0	0	0	0	0	0	0	0	0	0	0	0	0	0	0	0	0	0
	604	0	0	0	0	0	0	0	0	0	0	0	0	0	0	0	0	0	0	0	0									604	0	0	0	0	0	0	0	0	0	0	0	0	0	0	0	0	0	0	0
	605	0	0	0	0	0	0	0	0	0	0	0	0	0	0	0	0	0	0	0	0									605	0	0	0	0	0	0	0	0	0	0	0	0	0	0	0	0	0	0	0
	606	0	0	0	0	0	0	0	0	0	0	0	0	0	0	0	0	0	0	0	0									606	0	0	0	0	0	0	0	0	0	0	0	0	0	0	0	0	0	0	0
	607	0	0	0	0	0	0	0	0	0	0	0	0	0	0	0	0	0	0	0	0									607	0	0	0	0	0	0	0	0	0	0	0	0	0	0	0	0	0	0	0
	608	0	0	0	0	0	0	0	0	0	0	0	0	0	0	0	0	0	0	0	0									608	0	0	0	0	0	0	0	0	0	0	0	0	0	0	0	0	0	0	0
	609	0	0	0	0	0	0	0	0	0	0	0	0	0	0	0	0	0	0	0	0									609	0	0	0	0	0	0	0	0	0	0	0	0	0	0	0	0	0	0	0
	610	0	0	0	0	0	0	0	0	0	0	0	0	0	0	0	0	0	0	0	0									610	0	0	0	0	0	0	0	0	0	0	0	0	0	0	0	0	0	0	0
	611	0	0	0	0	0	0	0	0	0	0	0	0	0	0	0	0	0	0	0	0									611	0	0	0	0	0	0	0	0	0	0	0	0	0	0	0	0	0	0	0
	612	0	0	0	0	0	0	0	0	0	0	0	0	0	0	0	0	0	0	0	0									612	0	0	0	0	0	0	0	0	0	0	0	0	0	0	0	0	0	0	0
	613	0	0	0	0	0	0	0	0	0	0	0	0	0	0	0	0	0	0	0	0									613	0	0	0	0	0	0	0	0	0	0	0	0	0	0	0	0	0	0	0
	614	0	0	0	0	0	0	0	0	0	0	0	0	0	0	0	0	0	0	0	0									614	0	0	0	0	0	0	0	0	0	0	0	0	0	0	0	0	0	0	0
	615	0	0	0	0	0	0	0	0	0	0	0	0	0	0	0	0	0	0	0	0									615	0	0	0	0	0	0	0	0	0	0	0	0	0	0	0	0	0	0	0
	616	0	0	0	0	0	0	0	0	0	0	0	0	0	0	0	0	0	0	0	0									616	0	0	0	0	0	0	0	0	0	0	0	0	0	0	0	0	0	0	0
	617	0	0	0	0	0	0	0	0	0	0	0	0	0	0	0	0	0	0	0	0									617	0	0	0	0	0	0	0	0	0	0	0	0	0	0	0	0	0	0	0
	618	0	0	0	0	0	0	0	0	0	0	0	0	0	0	0	0	0	0	0	0									618	0	0	0	0	0	0	0	0	0	0	0	0	0	0	0	0	0	0	0
	619	0	0	0	0	0	0	0	0	0	0	0	0	0	0	0	0	0	0	0	0									619	0	0	0	0	0	0	0	0	0	0	0	0	0	0	0	0	0	0	0
	620	0	0	0	0	0	0	0	0	0	0	0	0	0	0	0	0	0	0	0	0									620	0	0	0	0	0	0	0	0	0	0	0	0	0	0	0	0	0	0	0
	621	0	0	0	0	0	0	0	0	0	0	0	0	0	0	0	0	0	0	0	0									621	0	0	0	0	0	0	0	0	0	0	0	0	0	0	0	0	0	0	0
	622	0	0	0	0	0	0	0	0	0	0	0	0	0	0	0	0	0	0	0	0									622	0	0	0	0	0	0	0	0	0	0	0	0	0	0	0	0	0	0	0
	623	0	0	0	0	0	0	0	0	0	0	0	0	0	0	0	0	0	0	0	0									623	0	0	0	0	0	0	0	0	0	0	0	0	0	0	0	0	0	0	0
	624	0	0	0	0	0	0	0	0	0	0	0	0	0	0	0	0	0	0	0	0									624	0	0	0	0	0	0	0	0	0	0	0	0	0	0	0	0	0	0	0
	625	0	0	0	0	0	0	0	0	0	0	0	0	0	0	0	0	0	0	0	0									625	0	0	0	0	0	0	0	0	0	0	0	0	0	0	0	0	0	0	0
	626	0	0	0	0	0	0	0	0	0	0	0	0	0	0	0	0	0	0	0	0									626	0	0	0	0	0	0	0	0	0	0	0	0	0	0	0	0	0	0	0
	627	0	0	0	0	0	0	0	0	0	0	0	0	0	0	0	0	0	0	0	0									627	0	0	0	0	0	0	0	0	0	0	0	0	0	0	0	0	0	0	0
	628	0	0	0	0	0	0	0	0	0	0	0	0	0	0	0	0	0	0	0	0									628	0	0	0	0	0	0	0	0	0	0	0	0	0	0	0	0	0	0	0
	629	0	0	0	0	0	0	0	0	0	0	0	0	0	0	0	0	0	0	0	0									629	0	0	0	0	0	0	0	0	0	0	0	0	0	0	0	0	0	0	0
	630	0	0	0	0	0	0	0	0	0	0	0	0	0	0	0	0	0	0	0	0									630	0	0	0	0	0	0	0	0	0	0	0	0	0	0	0	0	0	0	0
	631	0	0	0	0	0	0	0	0	0	0	0	0	0	0	0	0	0	0	0	0									631	0	0	0	0	0	0	0	0	0	0	0	0	0	0	0	0	0	0	0
	632	0	0	0	0	0	0	0	0	0	0	0	0	0	0	0	0	0	0	0	0									632	0	0	0	0	0	0	0	0	0	0	0	0	0	0	0	0	0	0	0
	633	0	0	0	0	0	0	0	0	0	0	0	0	0	0	0	0	0	0	0	0									633	0	0	0	0	0	0	0	0	0	0	0	0	0	0	0	0	0	0	0
	634	0	0	0	0	0	0	0	0	0	0	0	0	0	0	0	0	0	0	0	0									634	0	0	0	0	0	0	0	0	0	0	0	0	0	0	0	0	0	0	0
	635	0	0	0	0	0	0	0	0	0	0	0	0	0	0	0	0	0	0	0	0									635	0	0	0	0	0	0	0	0	0	0	0	0	0	0	0	0	0	0	0
	636	0	0	0	0	0	0	0	0	0	0	0	0	0	0	0	0	0	0	0	0									636	0	0	0	0	0	0	0	0	0	0	0	0	0	0	0	0	0	0	0
	637	0	0	0	0	0	0	0	0	0	0	0	0	0	0	0	0	0	0	0	0									637	0	0	0	0	0	0	0	0	0	0	0	0	0	0	0	0	0	0	0
	638	0	0	0	0	0	0	0	0	0	0	0	0	0	0	0	0	0	0	0	0									638	0	0	0	0	0	0	0	0	0	0	0	0	0	0	0	0	0	0	0
	639	0	0	0	0	0	0	0	0	0	0	0	0	0	0	0	0	0	0	0	0									639	0	0	0	0	0	0	0	0	0	0	0	0	0	0	0	0	0	0	0
	640	0	0	0	0	0	0	0	0	0	0	0	0	0	0	0	0	0	0	0	0									640	0	0	0	0	0	0	0	0	0	0	0	0	0	0	0	0	0	0	0
	641	0	0	0	0	0	0	0	0	0	0	0	0	0	0	0	0	0	0	0	0									641	0	0	0	0	0	0	0	0	0	0	0	0	0	0	0	0	0	0	0
	642	0	0	0	0	0	0	0	0	0	0	0	0	0	0	0	0	0	0	0	0									642	0	0	0	0	0	0	0	0	0	0	0	0	0	0	0	0	0	0	0
	643	0	0	0	0	0	0	0	0	0	0	0	0	0	0	0	0	0	0	0	0									643	0	0	0	0	0	0	0	0	0	0	0	0	0	0	0	0	0	0	0
	644	0	0	0	0	0	0	0	0	0	0	0	0	0	0	0	0	0	0	0	0									644	0	0	0	0	0	0	0	0	0	0	0	0	0	0	0	0	0	0	0
	645	0	0	0	0	0	0	0	0	0	0	0	0	0	0	0	0	0	0	0	0									645	0	0	0	0	0	0	0	0	0	0	0	0	0	0	0	0	0	0	0
	646	0	0	0	0	0	0	0	0	0	0	0	0	0	0	0	0	0	0	0	0									646	0	0	0	0	0	0	0	0	0	0	0	0	0	0	0	0	0	0	0
	647	0	0	0	0	0	0	0	0	0	0	0	0	0	0	0	0	0	0	0	0									647	0	0	0	0	0	0	0	0	0	0	0	0	0	0	0	0	0	0	0
	648	0	0	0	0	0	0	0	0	0	0	0	0	0	0	0	0	0	0	0	0									648	0	0	0	0	0	0	0	0	0	0	0	0	0	0	0	0	0	0	0
	649	0	0	0	0	0	0	0	0	0	0	0	0	0	0	0	0	0	0	0	0									649	0	0	0	0	0	0	0	0	0	0	0	0	0	0	0	0	0	0	0
	650	0	0	0	0	0	0	0	0	0	0	0	0	0	0	0	0	0	0	0	0									650	0	0	0	0	0	0	0	0	0	0	0	0	0	0	0	0	0	0	0
	651	0	0	0	0	0	0	0	0	0	0	0	0	0	0	0	0	0	0	0	0									651	0	0	0	0	0	0	0	0	0	0	0	0	0	0	0	0	0	0	0
	652	0	0	0	0	0	0	0	0	0	0	0	0	0	0	0	0	0	0	0	0									652	0	0	0	0	0	0	0	0	0	0	0	0	0	0	0	0	0	0	0
	653	0	0	0	0	0	0	0	0	0	0	0	0	0	0	0	0	0	0	0	0									653	0	0	0	0	0	0	0	0	0	0	0	0	0	0	0	0	0	0	0
	654	0	0	0	0	0	0	0	0	0	0	0	0	0	0	0	0	0	0	0	0									654	0	0	0	0	0	0	0	0	0	0	0	0	0	0	0	0	0	0	0
	655	0	0	0	0	0	0	0	0	0	0	0	0	0	0	0	0	0	0	0	0									655	0	0	0	0	0	0	0	0	0	0	0	0	0	0	0	0	0	0	0
	656	0	0	0	0	0	0	0	0	0	0	0	0	0	0	0	0	0	0	0	0									656	0	0	0	0	0	0	0	0	0	0	0	0	0	0	0	0	0	0	0
	657	0	0	0	0	0	0	0	0	0	0	0	0	0	0	0	0	0	0	0	0									657	0	0	0	0	0	0	0	0	0	0	0	0	0	0	0	0	0	0	0
	658	0	0	0	0	0	0	0	0	0	0	0	0	0	0	0	0	0	0	0	0									658	0	0	0	0	0	0	0	0	0	0	0	0	0	0	0	0	0	0	0
	659	0	0	0	0	0	0	0	0	0	0	0	0	0	0	0	0	0	0	0	0									659	0	0	0	0	0	0	0	0	0	0	0	0	0	0	0	0	0	0	0
	660	0	0	0	0	0	0	0	0	0	0	0	0	0	0	0	0	0	0	0	0									660	0	0	0	0	0	0	0	0	0	0	0	0	0	0	0	0	0	0	0
	661	0	0	0	0	0	0	0	0	0	0	0	0	0	0	0	0	0	0	0	0									661	0	0	0	0	0	0	0	0	0	0	0	0	0	0	0	0	0	0	0
	662	0	0	0	0	0	0	0	0	0	0	0	0	0	0	0	0	0	0	0	0									662	0	0	0	0	0	0	0	0	0	0	0	0	0	0	0	0	0	0	0
	663	0	0	0	0	0	0	0	0	0	0	0	0	0	0	0	0	0	0	0	0									663	0	0	0	0	0	0	0	0	0	0	0	0	0	0	0	0	0	0	0
	664	0	0	0	0	0	0	0	0	0	0	0	0	0	0	0	0	0	0	0	0									664	0	0	0	0	0	0	0	0	0	0	0	0	0	0	0	0	0	0	0
	665	0	0	0	0	0	0	0	0	0	0	0	0	0	0	0	0	0	0	0	0									665	0	0	0	0	0	0	0	0	0	0	0	0	0	0	0	0	0	0	0
	666	0	0	0	0	0	0	0	0	0	0	0	0	0	0	0	0	0	0	0	0									666	0	0	0	0	0	0	0	0	0	0	0	0	0	0	0	0	0	0	0
	667	0	0	0	0	0	0	0	0	0	0	0	0	0	0	0	0	0	0	0	0									667	0	0	0	0	0	0	0	0	0	0	0	0	0	0	0	0	0	0	0
	668	0	0	0	0	0	0	0	0	0	0	0	0	0	0	0	0	0	0	0	0									668	0	0	0	0	0	0	0	0	0	0	0	0	0	0	0	0	0	0	0
	669	0	0	0	0	0	0	0	0	0	0	0	0	0	0	0	0	0	0	0	0									669	0	0	0	0	0	0	0	0	0	0	0	0	0	0	0	0	0	0	0
	670	0	0	0	0	0	0	0	0	0	0	0	0	0	0	0	0	0	0	0	0									670	0	0	0	0	0	0	0	0	0	0	0	0	0	0	0	0	0	0	0
	671	0	0	0	0	0	0	0	0	0	0	0	0	0	0	0	0	0	0	0	0									671	0	0	0	0	0	0	0	0	0	0	0	0	0	0	0	0	0	0	0
	672	0	0	0	0	0	0	0	0	0	0	0	0	0	0	0	0	0	0	0	0									672	0	0	0	0	0	0	0	0	0	0	0	0	0	0	0	0	0	0	0
	673	0	0	0	0	0	0	0	0	0	0	0	0	0	0	0	0	0	0	0	0									673	0	0	0	0	0	0	0	0	0	0	0	0	0	0	0	0	0	0	0
	674	0	0	0	0	0	0	0	0	0	0	0	0	0	0	0	0	0	0	0	0									674	0	0	0	0	0	0	0	0	0	0	0	0	0	0	0	0	0	0	0
	675	0	0	0	0	0	0	0	0	0	0	0	0	0	0	0	0	0	0	0	0									675	0	0	0	0	0	0	0	0	0	0	0	0	0	0	0	0	0	0	0
	676	0	0	0	0	0	0	0	0	0	0	0	0	0	0	0	0	0	0	0	0									676	0	0	0	0	0	0	0	0	0	0	0	0	0	0	0	0	0	0	0
	677	0	0	0	0	0	0	0	0	0	0	0	0	0	0	0	0	0	0	0	0									677	0	0	0	0	0	0	0	0	0	0	0	0	0	0	0	0	0	0	0
	678	0	0	0	0	0	0	0	0	0	0	0	0	0	0	0	0	0	0	0	0									678	0	0	0	0	0	0	0	0	0	0	0	0	0	0	0	0	0	0	0
	679	0	0	0	0	0	0	0	0	0	0	0	0	0	0	0	0	0	0	0	0									679	0	0	0	0	0	0	0	0	0	0	0	0	0	0	0	0	0	0	0
	680	0	0	0	0	0	0	0	0	0	0	0	0	0	0	0	0	0	0	0	0									680	0	0	0	0	0	0	0	0	0	0	0	0	0	0	0	0	0	0	0
	681	0	0	0	0	0	0	0	0	0	0	0	0	0	0	0	0	0	0	0	0									681	0	0	0	0	0	0	0	0	0	0	0	0	0	0	0	0	0	0	0
	682	0	0	0	0	0	0	0	0	0	0	0	0	0	0	0	0	0	0	0	0									682	0	0	0	0	0	0	0	0	0	0	0	0	0	0	0	0	0	0	0
	683	0	0	0	0	0	0	0	0	0	0	0	0	0	0	0	0	0	0	0	0									683	0	0	0	0	0	0	0	0	0	0	0	0	0	0	0	0	0	0	0
	684	0	0	0	0	0	0	0	0	0	0	0	0	0	0	0	0	0	0	0	0									684	0	0	0	0	0	0	0	0	0	0	0	0	0	0	0	0	0	0	0
	685	0	0	0	0	0	0	0	0	0	0	0	0	0	0	0	0	0	0	0	0									685	0	0	0	0	0	0	0	0	0	0	0	0	0	0	0	0	0	0	0
	686	0	0	0	0	0	0	0	0	0	0	0	0	0	0	0	0	0	0	0	0									686	0	0	0	0	0	0	0	0	0	0	0	0	0	0	0	0	0	0	0
	687	0	0	0	0	0	0	0	0	0	0	0	0	0	0	0	0	0	0	0	0									687	0	0	0	0	0	0	0	0	0	0	0	0	0	0	0	0	0	0	0
	688	0	0	0	0	0	0	0	0	0	0	0	0	0	0	0	0	0	0	0	0									688	0	0	0	0	0	0	0	0	0	0	0	0	0	0	0	0	0	0	0
	689	0	0	0	0	0	0	0	0	0	0	0	0	0	0	0	0	0	0	0	0									689	0	0	0	0	0	0	0	0	0	0	0	0	0	0	0	0	0	0	0
	690	0	0	0	0	0	0	0	0	0	0	0	0	0	0	0	0	0	0	0	0									690	0	0	0	0	0	0	0	0	0	0	0	0	0	0	0	0	0	0	0
	691	0	0	0	0	0	0	0	0	0	0	0	0	0	0	0	0	0	0	0	0									691	0	0	0	0	0	0	0	0	0	0	0	0	0	0	0	0	0	0	0
	692	0	0	0	0	0	0	0	0	0	0	0	0	0	0	0	0	0	0	0	0									692	0	0	0	0	0	0	0	0	0	0	0	0	0	0	0	0	0	0	0
	693	0	0	0	0	0	0	0	0	0	0	0	0	0	0	0	0	0	0	0	0									693	0	0	0	0	0	0	0	0	0	0	0	0	0	0	0	0	0	0	0
	694	0	0	0	0	0	0	0	0	0	0	0	0	0	0	0	0	0	0	0	0									694	0	0	0	0	0	0	0	0	0	0	0	0	0	0	0	0	0	0	0
	695	0	0	0	0	0	0	0	0	0	0	0	0	0	0	0	0	0	0	0	0									695	0	0	0	0	0	0	0	0	0	0	0	0	0	0	0	0	0	0	0
	696	0	0	0	0	0	0	0	0	0	0	0	0	0	0	0	0	0	0	0	0									696	0	0	0	0	0	0	0	0	0	0	0	0	0	0	0	0	0	0	0
	697	0	0	0	0	0	0	0	0	0	0	0	0	0	0	0	0	0	0	0	0									697	0	0	0	0	0	0	0	0	0	0	0	0	0	0	0	0	0	0	0
	698	0	0	0	0	0	0	0	0	0	0	0	0	0	0	0	0	0	0	0	0									698	0	0	0	0	0	0	0	0	0	0	0	0	0	0	0	0	0	0	0
	699	0	0	0	0	0	0	0	0	0	0	0	0	0	0	0	0	0	0	0	0									699	0	0	0	0	0	0	0	0	0	0	0	0	0	0	0	0	0	0	0
	700	0	0	0	0	0	0	0	0	0	0	0	0	0	0	0	0	0	0	0	0									700	0	0	0	0	0	0	0	0	0	0	0	0	0	0	0	0	0	0	0
	701	0	0	0	0	0	0	0	0	0	0	0	0	0	0	0	0	0	0	0	0									701	0	0	0	0	0	0	0	0	0	0	0	0	0	0	0	0	0	0	0
	702	0	0	0	0	0	0	0	0	0	0	0	0	0	0	0	0	0	0	0	0									702	0	0	0	0	0	0	0	0	0	0	0	0	0	0	0	0	0	0	0
	703	0	0	0	0	0	0	0	0	0	0	0	0	0	0	0	0	0	0	0	0									703	0	0	0	0	0	0	0	0	0	0	0	0	0	0	0	0	0	0	0
	704	0	0	0	0	0	0	0	0	0	0	0	0	0	0	0	0	0	0	0	0									704	0	0	0	0	0	0	0	0	0	0	0	0	0	0	0	0	0	0	0
	705	0	0	0	0	0	0	0	0	0	0	0	0	0	0	0	0	0	0	0	0									705	0	0	0	0	0	0	0	0	0	0	0	0	0	0	0	0	0	0	0
	706	0	0	0	0	0	0	0	0	0	0	0	0	0	0	0	0	0	0	0	0									706	0	0	0	0	0	0	0	0	0	0	0	0	0	0	0	0	0	0	0
	707	0	0	0	0	0	0	0	0	0	0	0	0	0	0	0	0	0	0	0	0									707	0	0	0	0	0	0	0	0	0	0	0	0	0	0	0	0	0	0	0
	708	0	0	0	0	0	0	0	0	0	0	0	0	0	0	0	0	0	0	0	0									708	0	0	0	0	0	0	0	0	0	0	0	0	0	0	0	0	0	0	0
	709	0	0	0	0	0	0	0	0	0	0	0	0	0	0	0	0	0	0	0	0									709	0	0	0	0	0	0	0	0	0	0	0	0	0	0	0	0	0	0	0
	710	0	0	0	0	0	0	0	0	0	0	0	0	0	0	0	0	0	0	0	0									710	0	0	0	0	0	0	0	0	0	0	0	0	0	0	0	0	0	0	0
	711	0	0	0	0	0	0	0	0	0	0	0	0	0	0	0	0	0	0	0	0									711	0	0	0	0	0	0	0	0	0	0	0	0	0	0	0	0	0	0	0
	712	0	0	0	0	0	0	0	0	0	0	0	0	0	0	0	0	0	0	0	0									712	0	0	0	0	0	0	0	0	0	0	0	0	0	0	0	0	0	0	0
	713	0	0	0	0	0	0	0	0	0	0	0	0	0	0	0	0	0	0	0	0									713	0	0	0	0	0	0	0	0	0	0	0	0	0	0	0	0	0	0	0
	714	0	0	0	0	0	0	0	0	0	0	0	0	0	0	0	0	0	0	0	0									714	0	0	0	0	0	0	0	0	0	0	0	0	0	0	0	0	0	0	0
	715	0	0	0	0	0	0	0	0	0	0	0	0	0	0	0	0	0	0	0	0									715	0	0	0	0	0	0	0	0	0	0	0	0	0	0	0	0	0	0	0
	716	0	0	0	0	0	0	0	0	0	0	0	0	0	0	0	0	0	0	0	0									716	0	0	0	0	0	0	0	0	0	0	0	0	0	0	0	0	0	0	0
	717	0	0	0	0	0	0	0	0	0	0	0	0	0	0	0	0	0	0	0	0									717	0	0	0	0	0	0	0	0	0	0	0	0	0	0	0	0	0	0	0
	718	0	0	0	0	0	0	0	0	0	0	0	0	0	0	0	0	0	0	0	0									718	0	0	0	0	0	0	0	0	0	0	0	0	0	0	0	0	0	0	0
	719	0	0	0	0	0	0	0	0	0	0	0	0	0	0	0	0	0	0	0	0									719	0	0	0	0	0	0	0	0	0	0	0	0	0	0	0	0	0	0	0
	720	0	0	0	0	0	0	0	0	0	0	0	0	0	0	0	0	0	0	0	0									720	0	0	0	0	0	0	0	0	0	0	0	0	0	0	0	0	0	0	0
	721	0	0	0	0	0	0	0	0	0	0	0	0	0	0	0	0	0	0	0	0									721	0	0	0	0	0	0	0	0	0	0	0	0	0	0	0	0	0	0	0
	722	0	0	0	0	0	0	0	0	0	0	0	0	0	0	0	0	0	0	0	0									722	0	0	0	0	0	0	0	0	0	0	0	0	0	0	0	0	0	0	0
	723	0	0	0	0	0	0	0	0	0	0	0	0	0	0	0	0	0	0	0	0									723	0	0	0	0	0	0	0	0	0	0	0	0	0	0	0	0	0	0	0
	724	0	0	0	0	0	0	0	0	0	0	0	0	0	0	0	0	0	0	0	0									724	0	0	0	0	0	0	0	0	0	0	0	0	0	0	0	0	0	0	0
	725	0	0	0	0	0	0	0	0	0	0	0	0	0	0	0	0	0	0	0	0									725	0	0	0	0	0	0	0	0	0	0	0	0	0	0	0	0	0	0	0
	726	0	0	0	0	0	0	0	0	0	0	0	0	0	0	0	0	0	0	0	0									726	0	0	0	0	0	0	0	0	0	0	0	0	0	0	0	0	0	0	0
	727	0	0	0	0	0	0	0	0	0	0	0	0	0	0	0	0	0	0	0	0									727	0	0	0	0	0	0	0	0	0	0	0	0	0	0	0	0	0	0	0
	728	0	0	0	0	0	0	0	0	0	0	0	0	0	0	0	0	0	0	0	0									728	0	0	0	0	0	0	0	0	0	0	0	0	0	0	0	0	0	0	0
	729	0	0	0	0	0	0	0	0	0	0	0	0	0	0	0	0	0	0	0	0									729	0	0	0	0	0	0	0	0	0	0	0	0	0	0	0	0	0	0	0
	730	0	0	0	0	0	0	0	0	0	0	0	0	0	0	0	0	0	0	0	0									730	0	0	0	0	0	0	0	0	0	0	0	0	0	0	0	0	0	0	0
	731	0	0	0	0	0	0	0	0	0	0	0	0	0	0	0	0	0	0	0	0									731	0	0	0	0	0	0	0	0	0	0	0	0	0	0	0	0	0	0	0
	732	0	0	0	0	0	0	0	0	0	0	0	0	0	0	0	0	0	0	0	0									732	0	0	0	0	0	0	0	0	0	0	0	0	0	0	0	0	0	0	0
	733	0	0	0	0	0	0	0	0	0	0	0	0	0	0	0	0	0	0	0	0									733	0	0	0	0	0	0	0	0	0	0	0	0	0	0	0	0	0	0	0
	734	0	0	0	0	0	0	0	0	0	0	0	0	0	0	0	0	0	0	0	0									734	0	0	0	0	0	0	0	0	0	0	0	0	0	0	0	0	0	0	0
	735	0	0	0	0	0	0	0	0	0	0	0	0	0	0	0	0	0	0	0	0									735	0	0	0	0	0	0	0	0	0	0	0	0	0	0	0	0	0	0	0
	736	0	0	0	0	0	0	0	0	0	0	0	0	0	0	0	0	0	0	0	0									736	0	0	0	0	0	0	0	0	0	0	0	0	0	0	0	0	0	0	0
	737	0	0	0	0	0	0	0	0	0	0	0	0	0	0	0	0	0	0	0	0									737	0	0	0	0	0	0	0	0	0	0	0	0	0	0	0	0	0	0	0
	738	0	0	0	0	0	0	0	0	0	0	0	0	0	0	0	0	0	0	0	0									738	0	0	0	0	0	0	0	0	0	0	0	0	0	0	0	0	0	0	0
	739	0	0	0	0	0	0	0	0	0	0	0	0	0	0	0	0	0	0	0	0									739	0	0	0	0	0	0	0	0	0	0	0	0	0	0	0	0	0	0	0
	740	0	0	0	0	0	0	0	0	0	0	0	0	0	0	0	0	0	0	0	0									740	0	0	0	0	0	0	0	0	0	0	0	0	0	0	0	0	0	0	0
	741	0	0	0	0	0	0	0	0	0	0	0	0	0	0	0	0	0	0	0	0									741	0	0	0	0	0	0	0	0	0	0	0	0	0	0	0	0	0	0	0
	742	0	0	0	0	0	0	0	0	0	0	0	0	0	0	0	0	0	0	0	0									742	0	0	0	0	0	0	0	0	0	0	0	0	0	0	0	0	0	0	0
	743	0	0	0	0	0	0	0	0	0	0	0	0	0	0	0	0	0	0	0	0									743	0	0	0	0	0	0	0	0	0	0	0	0	0	0	0	0	0	0	0
	744	0	0	0	0	0	0	0	0	0	0	0	0	0	0	0	0	0	0	0	0									744	0	0	0	0	0	0	0	0	0	0	0	0	0	0	0	0	0	0	0
	745	0	0	0	0	0	0	0	0	0	0	0	0	0	0	0	0	0	0	0	0									745	0	0	0	0	0	0	0	0	0	0	0	0	0	0	0	0	0	0	0
	746	0	0	0	0	0	0	0	0	0	0	0	0	0	0	0	0	0	0	0	0									746	0	0	0	0	0	0	0	0	0	0	0	0	0	0	0	0	0	0	0
	747	0	0	0	0	0	0	0	0	0	0	0	0	0	0	0	0	0	0	0	0									747	0	0	0	0	0	0	0	0	0	0	0	0	0	0	0	0	0	0	0
	748	0	0	0	0	0	0	0	0	0	0	0	0	0	0	0	0	0	0	0	0									748	0	0	0	0	0	0	0	0	0	0	0	0	0	0	0	0	0	0	0
	749	0	0	0	0	0	0	0	0	0	0	0	0	0	0	0	0	0	0	0	0									749	0	0	0	0	0	0	0	0	0	0	0	0	0	0	0	0	0	0	0
	750	0	0	0	0	0	0	0	0	0	0	0	0	0	0	0	0	0	0	0	0									750	0	0	0	0	0	0	0	0	0	0	0	0	0	0	0	0	0	0	0
	751	0	0	0	0	0	0	0	0	0	0	0	0	0	0	0	0	0	0	0	0									751	0	0	0	0	0	0	0	0	0	0	0	0	0	0	0	0	0	0	0
	752	0	0	0	0	0	0	0	0	0	0	0	0	0	0	0	0	0	0	0	0									752	0	0	0	0	0	0	0	0	0	0	0	0	0	0	0	0	0	0	0
	753	0	0	0	0	0	0	0	0	0	0	0	0	0	0	0	0	0	0	0	0									753	0	0	0	0	0	0	0	0	0	0	0	0	0	0	0	0	0	0	0
	754	0	0	0	0	0	0	0	0	0	0	0	0	0	0	0	0	0	0	0	0									754	0	0	0	0	0	0	0	0	0	0	0	0	0	0	0	0	0	0	0
	755	0	0	0	0	0	0	0	0	0	0	0	0	0	0	0	0	0	0	0	0									755	0	0	0	0	0	0	0	0	0	0	0	0	0	0	0	0	0	0	0
	756	0	0	0	0	0	0	0	0	0	0	0	0	0	0	0	0	0	0	0	0									756	0	0	0	0	0	0	0	0	0	0	0	0	0	0	0	0	0	0	0
	757	0	0	0	0	0	0	0	0	0	0	0	0	0	0	0	0	0	0	0	0									757	0	0	0	0	0	0	0	0	0	0	0	0	0	0	0	0	0	0	0
	758	0	0	0	0	0	0	0	0	0	0	0	0	0	0	0	0	0	0	0	0									758	0	0	0	0	0	0	0	0	0	0	0	0	0	0	0	0	0	0	0
	759	0	0	0	0	0	0	0	0	0	0	0	0	0	0	0	0	0	0	0	0									759	0	0	0	0	0	0	0	0	0	0	0	0	0	0	0	0	0	0	0
	760	0	0	0	0	0	0	0	0	0	0	0	0	0	0	0	0	0	0	0	0									760	0	0	0	0	0	0	0	0	0	0	0	0	0	0	0	0	0	0	0
	761	0	0	0	0	0	0	0	0	0	0	0	0	0	0	0	0	0	0	0	0									761	0	0	0	0	0	0	0	0	0	0	0	0	0	0	0	0	0	0	0
	762	0	0	0	0	0	0	0	0	0	0	0	0	0	0	0	0	0	0	0	0									762	0	0	0	0	0	0	0	0	0	0	0	0	0	0	0	0	0	0	0
	763	0	0	0	0	0	0	0	0	0	0	0	0	0	0	0	0	0	0	0	0									763	0	0	0	0	0	0	0	0	0	0	0	0	0	0	0	0	0	0	0
	764	0	0	0	0	0	0	0	0	0	0	0	0	0	0	0	0	0	0	0	0									764	0	0	0	0	0	0	0	0	0	0	0	0	0	0	0	0	0	0	0
	765	0	0	0	0	0	0	0	0	0	0	0	0	0	0	0	0	0	0	0	0									765	0	0	0	0	0	0	0	0	0	0	0	0	0	0	0	0	0	0	0
	766	0	0	0	0	0	0	0	0	0	0	0	0	0	0	0	0	0	0	0	0									766	0	0	0	0	0	0	0	0	0	0	0	0	0	0	0	0	0	0	0
	767	0	0	0	0	0	0	0	0	0	0	0	0	0	0	0	0	0	0	0	0									767	0	0	0	0	0	0	0	0	0	0	0	0	0	0	0	0	0	0	0
	768	0	0	0	0	0	0	0	0	0	0	0	0	0	0	0	0	0	0	0	0									768	0	0	0	0	0	0	0	0	0	0	0	0	0	0	0	0	0	0	0
	769	0	0	0	0	0	0	0	0	0	0	0	0	0	0	0	0	0	0	0	0									769	0	0	0	0	0	0	0	0	0	0	0	0	0	0	0	0	0	0	0
	770	0	0	0	0	0	0	0	0	0	0	0	0	0	0	0	0	0	0	0	0									770	0	0	0	0	0	0	0	0	0	0	0	0	0	0	0	0	0	0	0
	771	0	0	0	0	0	0	0	0	0	0	0	0	0	0	0	0	0	0	0	0									771	0	0	0	0	0	0	0	0	0	0	0	0	0	0	0	0	0	0	0
	772	0	0	0	0	0	0	0	0	0	0	0	0	0	0	0	0	0	0	0	0									772	0	0	0	0	0	0	0	0	0	0	0	0	0	0	0	0	0	0	0
	773	0	0	0	0	0	0	0	0	0	0	0	0	0	0	0	0	0	0	0	0									773	0	0	0	0	0	0	0	0	0	0	0	0	0	0	0	0	0	0	0
	774	0	0	0	0	0	0	0	0	0	0	0	0	0	0	0	0	0	0	0	0									774	0	0	0	0	0	0	0	0	0	0	0	0	0	0	0	0	0	0	0
	775	0	0	0	0	0	0	0	0	0	0	0	0	0	0	0	0	0	0	0	0									775	0	0	0	0	0	0	0	0	0	0	0	0	0	0	0	0	0	0	0
	776	0	0	0	0	0	0	0	0	0	0	0	0	0	0	0	0	0	0	0	0									776	0	0	0	0	0	0	0	0	0	0	0	0	0	0	0	0	0	0	0
	777	0	0	0	0	0	0	0	0	0	0	0	0	0	0	0	0	0	0	0	0									777	0	0	0	0	0	0	0	0	0	0	0	0	0	0	0	0	0	0	0
	778	0	0	0	0	0	0	0	0	0	0	0	0	0	0	0	0	0	0	0	0									778	0	0	0	0	0	0	0	0	0	0	0	0	0	0	0	0	0	0	0
	779	0	0	0	0	0	0	0	0	0	0	0	0	0	0	0	0	0	0	0	0									779	0	0	0	0	0	0	0	0	0	0	0	0	0	0	0	0	0	0	0
	780	0	0	0	0	0	0	0	0	0	0	0	0	0	0	0	0	0	0	0	0									780	0	0	0	0	0	0	0	0	0	0	0	0	0	0	0	0	0	0	0
	781	0	0	0	0	0	0	0	0	0	0	0	0	0	0	0	0	0	0	0	0									781	0	0	0	0	0	0	0	0	0	0	0	0	0	0	0	0	0	0	0
	782	0	0	0	0	0	0	0	0	0	0	0	0	0	0	0	0	0	0	0	0									782	0	0	0	0	0	0	0	0	0	0	0	0	0	0	0	0	0	0	0
	783	0	0	0	0	0	0	0	0	0	0	0	0	0	0	0	0	0	0	0	0									783	0	0	0	0	0	0	0	0	0	0	0	0	0	0	0	0	0	0	0
	784	0	0	0	0	0	0	0	0	0	0	0	0	0	0	0	0	0	0	0	0									784	0	0	0	0	0	0	0	0	0	0	0	0	0	0	0	0	0	0	0
	785	0	0	0	0	0	0	0	0	0	0	0	0	0	0	0	0	0	0	0	0									785	0	0	0	0	0	0	0	0	0	0	0	0	0	0	0	0	0	0	0
	786	0	0	0	0	0	0	0	0	0	0	0	0	0	0	0	0	0	0	0	0									786	0	0	0	0	0	0	0	0	0	0	0	0	0	0	0	0	0	0	0
	787	0	0	0	0	0	0	0	0	0	0	0	0	0	0	0	0	0	0	0	0									787	0	0	0	0	0	0	0	0	0	0	0	0	0	0	0	0	0	0	0
	788	0	0	0	0	0	0	0	0	0	0	0	0	0	0	0	0	0	0	0	0									788	0	0	0	0	0	0	0	0	0	0	0	0	0	0	0	0	0	0	0
	789	0	0	0	0	0	0	0	0	0	0	0	0	0	0	0	0	0	0	0	0									789	0	0	0	0	0	0	0	0	0	0	0	0	0	0	0	0	0	0	0
	790	0	0	0	0	0	0	0	0	0	0	0	0	0	0	0	0	0	0	0	0									790	0	0	0	0	0	0	0	0	0	0	0	0	0	0	0	0	0	0	0
	791	0	0	0	0	0	0	0	0	0	0	0	0	0	0	0	0	0	0	0	0									791	0	0	0	0	0	0	0	0	0	0	0	0	0	0	0	0	0	0	0
	792	0	0	0	0	0	0	0	0	0	0	0	0	0	0	0	0	0	0	0	0									792	0	0	0	0	0	0	0	0	0	0	0	0	0	0	0	0	0	0	0
	793	0	0	0	0	0	0	0	0	0	0	0	0	0	0	0	0	0	0	0	0									793	0	0	0	0	0	0	0	0	0	0	0	0	0	0	0	0	0	0	0
	794	0	0	0	0	0	0	0	0	0	0	0	0	0	0	0	0	0	0	0	0									794	0	0	0	0	0	0	0	0	0	0	0	0	0	0	0	0	0	0	0
	795	0	0	0	0	0	0	0	0	0	0	0	0	0	0	0	0	0	0	0	0									795	0	0	0	0	0	0	0	0	0	0	0	0	0	0	0	0	0	0	0
	796	0	0	0	0	0	0	0	0	0	0	0	0	0	0	0	0	0	0	0	0									796	0	0	0	0	0	0	0	0	0	0	0	0	0	0	0	0	0	0	0
	797	0	0	0	0	0	0	0	0	0	0	0	0	0	0	0	0	0	0	0	0									797	0	0	0	0	0	0	0	0	0	0	0	0	0	0	0	0	0	0	0
	798	0	0	0	0	0	0	0	0	0	0	0	0	0	0	0	0	0	0	0	0									798	0	0	0	0	0	0	0	0	0	0	0	0	0	0	0	0	0	0	0
	799	0	0	0	0	0	0	0	0	0	0	0	0	0	0	0	0	0	0	0	0									799	0	0	0	0	0	0	0	0	0	0	0	0	0	0	0	0	0	0	0
	800	0	0	0	0	0	0	0	0	0	0	0	0	0	0	0	0	0	0	0	0									800	0	0	0	0	0	0	0	0	0	0	0	0	0	0	0	0	0	0	0
	801	0	0	0	0	0	0	0	0	0	0	0	0	0	0	0	0	0	0	0	0									801	0	0	0	0	0	0	0	0	0	0	0	0	0	0	0	0	0	0	0
	802	0	0	0	0	0	0	0	0	0	0	0	0	0	0	0	0	0	0	0	0									802	0	0	0	0	0	0	0	0	0	0	0	0	0	0	0	0	0	0	0
	803	0	0	0	0	0	0	0	0	0	0	0	0	0	0	0	0	0	0	0	0									803	0	0	0	0	0	0	0	0	0	0	0	0	0	0	0	0	0	0	0
	804	0	0	0	0	0	0	0	0	0	0	0	0	0	0	0	0	0	0	0	0									804	0	0	0	0	0	0	0	0	0	0	0	0	0	0	0	0	0	0	0
	805	0	0	0	0	0	0	0	0	0	0	0	0	0	0	0	0	0	0	0	0									805	0	0	0	0	0	0	0	0	0	0	0	0	0	0	0	0	0	0	0
	806	0	0	0	0	0	0	0	0	0	0	0	0	0	0	0	0	0	0	0	0									806	0	0	0	0	0	0	0	0	0	0	0	0	0	0	0	0	0	0	0
	807	0	0	0	0	0	0	0	0	0	0	0	0	0	0	0	0	0	0	0	0									807	0	0	0	0	0	0	0	0	0	0	0	0	0	0	0	0	0	0	0
	808	0	0	0	0	0	0	0	0	0	0	0	0	0	0	0	0	0	0	0	0									808	0	0	0	0	0	0	0	0	0	0	0	0	0	0	0	0	0	0	0
	809	0	0	0	0	0	0	0	0	0	0	0	0	0	0	0	0	0	0	0	0									809	0	0	0	0	0	0	0	0	0	0	0	0	0	0	0	0	0	0	0
	810	0	0	0	0	0	0	0	0	0	0	0	0	0	0	0	0	0	0	0	0									810	0	0	0	0	0	0	0	0	0	0	0	0	0	0	0	0	0	0	0
	811	0	0	0	0	0	0	0	0	0	0	0	0	0	0	0	0	0	0	0	0									811	0	0	0	0	0	0	0	0	0	0	0	0	0	0	0	0	0	0	0
	812	0	0	0	0	0	0	0	0	0	0	0	0	0	0	0	0	0	0	0	0									812	0	0	0	0	0	0	0	0	0	0	0	0	0	0	0	0	0	0	0
	813	0	0	0	0	0	0	0	0	0	0	0	0	0	0	0	0	0	0	0	0									813	0	0	0	0	0	0	0	0	0	0	0	0	0	0	0	0	0	0	0
	814	0	0	0	0	0	0	0	0	0	0	0	0	0	0	0	0	0	0	0	0									814	0	0	0	0	0	0	0	0	0	0	0	0	0	0	0	0	0	0	0
	815	0	0	0	0	0	0	0	0	0	0	0	0	0	0	0	0	0	0	0	0									815	0	0	0	0	0	0	0	0	0	0	0	0	0	0	0	0	0	0	0
	816	0	0	0	0	0	0	0	0	0	0	0	0	0	0	0	0	0	0	0	0									816	0	0	0	0	0	0	0	0	0	0	0	0	0	0	0	0	0	0	0
	817	0	0	0	0	0	0	0	0	0	0	0	0	0	0	0	0	0	0	0	0									817	0	0	0	0	0	0	0	0	0	0	0	0	0	0	0	0	0	0	0
	818	0	0	0	0	0	0	0	0	0	0	0	0	0	0	0	0	0	0	0	0									818	0	0	0	0	0	0	0	0	0	0	0	0	0	0	0	0	0	0	0
	819	0	0	0	0	0	0	0	0	0	0	0	0	0	0	0	0	0	0	0	0									819	0	0	0	0	0	0	0	0	0	0	0	0	0	0	0	0	0	0	0
	820	0	0	0	0	0	0	0	0	0	0	0	0	0	0	0	0	0	0	0	0									820	0	0	0	0	0	0	0	0	0	0	0	0	0	0	0	0	0	0	0
	821	0	0	0	0	0	0	0	0	0	0	0	0	0	0	0	0	0	0	0	0									821	0	0	0	0	0	0	0	0	0	0	0	0	0	0	0	0	0	0	0
	822	0	0	0	0	0	0	0	0	0	0	0	0	0	0	0	0	0	0	0	0									822	0	0	0	0	0	0	0	0	0	0	0	0	0	0	0	0	0	0	0
	823	0	0	0	0	0	0	0	0	0	0	0	0	0	0	0	0	0	0	0	0									823	0	0	0	0	0	0	0	0	0	0	0	0	0	0	0	0	0	0	0
	824	0	0	0	0	0	0	0	0	0	0	0	0	0	0	0	0	0	0	0	0									824	0	0	0	0	0	0	0	0	0	0	0	0	0	0	0	0	0	0	0
	825	0	0	0	0	0	0	0	0	0	0	0	0	0	0	0	0	0	0	0	0									825	0	0	0	0	0	0	0	0	0	0	0	0	0	0	0	0	0	0	0
	826	0	0	0	0	0	0	0	0	0	0	0	0	0	0	0	0	0	0	0	0									826	0	0	0	0	0	0	0	0	0	0	0	0	0	0	0	0	0	0	0
	827	0	0	0	0	0	0	0	0	0	0	0	0	0	0	0	0	0	0	0	0									827	0	0	0	0	0	0	0	0	0	0	0	0	0	0	0	0	0	0	0
	828	0	0	0	0	0	0	0	0	0	0	0	0	0	0	0	0	0	0	0	0									828	0	0	0	0	0	0	0	0	0	0	0	0	0	0	0	0	0	0	0
	829	0	0	0	0	0	0	0	0	0	0	0	0	0	0	0	0	0	0	0	0									829	0	0	0	0	0	0	0	0	0	0	0	0	0	0	0	0	0	0	0
	830	0	0	0	0	0	0	0	0	0	0	0	0	0	0	0	0	0	0	0	0									830	0	0	0	0	0	0	0	0	0	0	0	0	0	0	0	0	0	0	0
	831	0	0	0	0	0	0	0	0	0	0	0	0	0	0	0	0	0	0	0	0									831	0	0	0	0	0	0	0	0	0	0	0	0	0	0	0	0	0	0	0
	832	0	0	0	0	0	0	0	0	0	0	0	0	0	0	0	0	0	0	0	0									832	0	0	0	0	0	0	0	0	0	0	0	0	0	0	0	0	0	0	0
	833	0	0	0	0	0	0	0	0	0	0	0	0	0	0	0	0	0	0	0	0									833	0	0	0	0	0	0	0	0	0	0	0	0	0	0	0	0	0	0	0
	834	0	0	0	0	0	0	0	0	0	0	0	0	0	0	0	0	0	0	0	0									834	0	0	0	0	0	0	0	0	0	0	0	0	0	0	0	0	0	0	0
	835	0	0	0	0	0	0	0	0	0	0	0	0	0	0	0	0	0	0	0	0									835	0	0	0	0	0	0	0	0	0	0	0	0	0	0	0	0	0	0	0
	836	0	0	0	0	0	0	0	0	0	0	0	0	0	0	0	0	0	0	0	0									836	0	0	0	0	0	0	0	0	0	0	0	0	0	0	0	0	0	0	0
	837	0	0	0	0	0	0	0	0	0	0	0	0	0	0	0	0	0	0	0	0									837	0	0	0	0	0	0	0	0	0	0	0	0	0	0	0	0	0	0	0
	838	0	0	0	0	0	0	0	0	0	0	0	0	0	0	0	0	0	0	0	0									838	0	0	0	0	0	0	0	0	0	0	0	0	0	0	0	0	0	0	0
	839	0	0	0	0	0	0	0	0	0	0	0	0	0	0	0	0	0	0	0	0									839	0	0	0	0	0	0	0	0	0	0	0	0	0	0	0	0	0	0	0
	840	0	0	0	0	0	0	0	0	0	0	0	0	0	0	0	0	0	0	0	0									840	0	0	0	0	0	0	0	0	0	0	0	0	0	0	0	0	0	0	0
	841	0	0	0	0	0	0	0	0	0	0	0	0	0	0	0	0	0	0	0	0									841	0	0	0	0	0	0	0	0	0	0	0	0	0	0	0	0	0	0	0
	842	0	0	0	0	0	0	0	0	0	0	0	0	0	0	0	0	0	0	0	0									842	0	0	0	0	0	0	0	0	0	0	0	0	0	0	0	0	0	0	0
	843	0	0	0	0	0	0	0	0	0	0	0	0	0	0	0	0	0	0	0	0									843	0	0	0	0	0	0	0	0	0	0	0	0	0	0	0	0	0	0	0
	844	0	0	0	0	0	0	0	0	0	0	0	0	0	0	0	0	0	0	0	0									844	0	0	0	0	0	0	0	0	0	0	0	0	0	0	0	0	0	0	0
	845	0	0	0	0	0	0	0	0	0	0	0	0	0	0	0	0	0	0	0	0									845	0	0	0	0	0	0	0	0	0	0	0	0	0	0	0	0	0	0	0
	846	0	0	0	0	0	0	0	0	0	0	0	0	0	0	0	0	0	0	0	0									846	0	0	0	0	0	0	0	0	0	0	0	0	0	0	0	0	0	0	0
	847	0	0	0	0	0	0	0	0	0	0	0	0	0	0	0	0	0	0	0	0									847	0	0	0	0	0	0	0	0	0	0	0	0	0	0	0	0	0	0	0
	848	0	0	0	0	0	0	0	0	0	0	0	0	0	0	0	0	0	0	0	0									848	0	0	0	0	0	0	0	0	0	0	0	0	0	0	0	0	0	0	0
	849	0	0	0	0	0	0	0	0	0	0	0	0	0	0	0	0	0	0	0	0									849	0	0	0	0	0	0	0	0	0	0	0	0	0	0	0	0	0	0	0
	850	0	0	0	0	0	0	0	0	0	0	0	0	0	0	0	0	0	0	0	0									850	0	0	0	0	0	0	0	0	0	0	0	0	0	0	0	0	0	0	0
	851	0	0	0	0	0	0	0	0	0	0	0	0	0	0	0	0	0	0	0	0									851	0	0	0	0	0	0	0	0	0	0	0	0	0	0	0	0	0	0	0
	852	0	0	0	0	0	0	0	0	0	0	0	0	0	0	0	0	0	0	0	0									852	0	0	0	0	0	0	0	0	0	0	0	0	0	0	0	0	0	0	0
	853	0	0	0	0	0	0	0	0	0	0	0	0	0	0	0	0	0	0	0	0									853	0	0	0	0	0	0	0	0	0	0	0	0	0	0	0	0	0	0	0
	854	0	0	0	0	0	0	0	0	0	0	0	0	0	0	0	0	0	0	0	0									854	0	0	0	0	0	0	0	0	0	0	0	0	0	0	0	0	0	0	0
	855	0	0	0	0	0	0	0	0	0	0	0	0	0	0	0	0	0	0	0	0									855	0	0	0	0	0	0	0	0	0	0	0	0	0	0	0	0	0	0	0
	856	0	0	0	0	0	0	0	0	0	0	0	0	0	0	0	0	0	0	0	0									856	0	0	0	0	0	0	0	0	0	0	0	0	0	0	0	0	0	0	0
	857	0	0	0	0	0	0	0	0	0	0	0	0	0	0	0	0	0	0	0	0									857	0	0	0	0	0	0	0	0	0	0	0	0	0	0	0	0	0	0	0
	858	0	0	0	0	0	0	0	0	0	0	0	0	0	0	0	0	0	0	0	0									858	0	0	0	0	0	0	0	0	0	0	0	0	0	0	0	0	0	0	0
	859	0	0	0	0	0	0	0	0	0	0	0	0	0	0	0	0	0	0	0	0									859	0	0	0	0	0	0	0	0	0	0	0	0	0	0	0	0	0	0	0
	860	0	0	0	0	0	0	0	0	0	0	0	0	0	0	0	0	0	0	0	0									860	0	0	0	0	0	0	0	0	0	0	0	0	0	0	0	0	0	0	0
	861	0	0	0	0	0	0	0	0	0	0	0	0	0	0	0	0	0	0	0	0									861	0	0	0	0	0	0	0	0	0	0	0	0	0	0	0	0	0	0	0
	862	0	0	0	0	0	0	0	0	0	0	0	0	0	0	0	0	0	0	0	0									862	0	0	0	0	0	0	0	0	0	0	0	0	0	0	0	0	0	0	0
	863	0	0	0	0	0	0	0	0	0	0	0	0	0	0	0	0	0	0	0	0									863	0	0	0	0	0	0	0	0	0	0	0	0	0	0	0	0	0	0	0
	864	0	0	0	0	0	0	0	0	0	0	0	0	0	0	0	0	0	0	0	0									864	0	0	0	0	0	0	0	0	0	0	0	0	0	0	0	0	0	0	0
	865	0	0	0	0	0	0	0	0	0	0	0	0	0	0	0	0	0	0	0	0									865	0	0	0	0	0	0	0	0	0	0	0	0	0	0	0	0	0	0	0
	866	0	0	0	0	0	0	0	0	0	0	0	0	0	0	0	0	0	0	0	0									866	0	0	0	0	0	0	0	0	0	0	0	0	0	0	0	0	0	0	0
	867	0	0	0	0	0	0	0	0	0	0	0	0	0	0	0	0	0	0	0	0									867	0	0	0	0	0	0	0	0	0	0	0	0	0	0	0	0	0	0	0
	868	0	0	0	0	0	0	0	0	0	0	0	0	0	0	0	0	0	0	0	0									868	0	0	0	0	0	0	0	0	0	0	0	0	0	0	0	0	0	0	0
	869	0	0	0	0	0	0	0	0	0	0	0	0	0	0	0	0	0	0	0	0									869	0	0	0	0	0	0	0	0	0	0	0	0	0	0	0	0	0	0	0
	870	0	0	0	0	0	0	0	0	0	0	0	0	0	0	0	0	0	0	0	0									870	0	0	0	0	0	0	0	0	0	0	0	0	0	0	0	0	0	0	0
	871	0	0	0	0	0	0	0	0	0	0	0	0	0	0	0	0	0	0	0	0									871	0	0	0	0	0	0	0	0	0	0	0	0	0	0	0	0	0	0	0
	872	0	0	0	0	0	0	0	0	0	0	0	0	0	0	0	0	0	0	0	0									872	0	0	0	0	0	0	0	0	0	0	0	0	0	0	0	0	0	0	0
	873	0	0	0	0	0	0	0	0	0	0	0	0	0	0	0	0	0	0	0	0									873	0	0	0	0	0	0	0	0	0	0	0	0	0	0	0	0	0	0	0
	874	0	0	0	0	0	0	0	0	0	0	0	0	0	0	0	0	0	0	0	0									874	0	0	0	0	0	0	0	0	0	0	0	0	0	0	0	0	0	0	0
	875	0	0	0	0	0	0	0	0	0	0	0	0	0	0	0	0	0	0	0	0									875	0	0	0	0	0	0	0	0	0	0	0	0	0	0	0	0	0	0	0
	876	0	0	0	0	0	0	0	0	0	0	0	0	0	0	0	0	0	0	0	0									876	0	0	0	0	0	0	0	0	0	0	0	0	0	0	0	0	0	0	0
	877	0	0	0	0	0	0	0	0	0	0	0	0	0	0	0	0	0	0	0	0									877	0	0	0	0	0	0	0	0	0	0	0	0	0	0	0	0	0	0	0
	878	0	0	0	0	0	0	0	0	0	0	0	0	0	0	0	0	0	0	0	0									878	0	0	0	0	0	0	0	0	0	0	0	0	0	0	0	0	0	0	0
	879	0	0	0	0	0	0	0	0	0	0	0	0	0	0	0	0	0	0	0	0									879	0	0	0	0	0	0	0	0	0	0	0	0	0	0	0	0	0	0	0
	880	0	0	0	0	0	0	0	0	0	0	0	0	0	0	0	0	0	0	0	0									880	0	0	0	0	0	0	0	0	0	0	0	0	0	0	0	0	0	0	0
	881	0	0	0	0	0	0	0	0	0	0	0	0	0	0	0	0	0	0	0	0									881	0	0	0	0	0	0	0	0	0	0	0	0	0	0	0	0	0	0	0
	882	0	0	0	0	0	0	0	0	0	0	0	0	0	0	0	0	0	0	0	0									882	0	0	0	0	0	0	0	0	0	0	0	0	0	0	0	0	0	0	0
	883	0	0	0	0	0	0	0	0	0	0	0	0	0	0	0	0	0	0	0	0									883	0	0	0	0	0	0	0	0	0	0	0	0	0	0	0	0	0	0	0
	884	0	0	0	0	0	0	0	0	0	0	0	0	0	0	0	0	0	0	0	0									884	0	0	0	0	0	0	0	0	0	0	0	0	0	0	0	0	0	0	0
	885	0	0	0	0	0	0	0	0	0	0	0	0	0	0	0	0	0	0	0	0									885	0	0	0	0	0	0	0	0	0	0	0	0	0	0	0	0	0	0	0
	886	0	0	0	0	0	0	0	0	0	0	0	0	0	0	0	0	0	0	0	0									886	0	0	0	0	0	0	0	0	0	0	0	0	0	0	0	0	0	0	0
	887	0	0	0	0	0	0	0	0	0	0	0	0	0	0	0	0	0	0	0	0									887	0	0	0	0	0	0	0	0	0	0	0	0	0	0	0	0	0	0	0
	888	0	0	0	0	0	0	0	0	0	0	0	0	0	0	0	0	0	0	0	0									888	0	0	0	0	0	0	0	0	0	0	0	0	0	0	0	0	0	0	0
	889	0	0	0	0	0	0	0	0	0	0	0	0	0	0	0	0	0	0	0	0									889	0	0	0	0	0	0	0	0	0	0	0	0	0	0	0	0	0	0	0
	890	0	0	0	0	0	0	0	0	0	0	0	0	0	0	0	0	0	0	0	0									890	0	0	0	0	0	0	0	0	0	0	0	0	0	0	0	0	0	0	0
	891	0	0	0	0	0	0	0	0	0	0	0	0	0	0	0	0	0	0	0	0									891	0	0	0	0	0	0	0	0	0	0	0	0	0	0	0	0	0	0	0
	892	0	0	0	0	0	0	0	0	0	0	0	0	0	0	0	0	0	0	0	0									892	0	0	0	0	0	0	0	0	0	0	0	0	0	0	0	0	0	0	0
	893	0	0	0	0	0	0	0	0	0	0	0	0	0	0	0	0	0	0	0	0									893	0	0	0	0	0	0	0	0	0	0	0	0	0	0	0	0	0	0	0
	894	0	0	0	0	0	0	0	0	0	0	0	0	0	0	0	0	0	0	0	0									894	0	0	0	0	0	0	0	0	0	0	0	0	0	0	0	0	0	0	0
	895	0	0	0	0	0	0	0	0	0	0	0	0	0	0	0	0	0	0	0	0									895	0	0	0	0	0	0	0	0	0	0	0	0	0	0	0	0	0	0	0
	896	0	0	0	0	0	0	0	0	0	0	0	0	0	0	0	0	0	0	0	0									896	0	0	0	0	0	0	0	0	0	0	0	0	0	0	0	0	0	0	0
	897	0	0	0	0	0	0	0	0	0	0	0	0	0	0	0	0	0	0	0	0									897	0	0	0	0	0	0	0	0	0	0	0	0	0	0	0	0	0	0	0
	898	0	0	0	0	0	0	0	0	0	0	0	0	0	0	0	0	0	0	0	0									898	0	0	0	0	0	0	0	0	0	0	0	0	0	0	0	0	0	0	0
	899	0	0	0	0	0	0	0	0	0	0	0	0	0	0	0	0	0	0	0	0									899	0	0	0	0	0	0	0	0	0	0	0	0	0	0	0	0	0	0	0
	900	0	0	0	0	0	0	0	0	0	0	0	0	0	0	0	0	0	0	0	0									900	0	0	0	0	0	0	0	0	0	0	0	0	0	0	0	0	0	0	0
	901	0	0	0	0	0	0	0	0	0	0	0	0	0	0	0	0	0	0	0	0									901	0	0	0	0	0	0	0	0	0	0	0	0	0	0	0	0	0	0	0
	902	0	0	0	0	0	0	0	0	0	0	0	0	0	0	0	0	0	0	0	0									902	0	0	0	0	0	0	0	0	0	0	0	0	0	0	0	0	0	0	0
	903	0	0	0	0	0	0	0	0	0	0	0	0	0	0	0	0	0	0	0	0									903	0	0	0	0	0	0	0	0	0	0	0	0	0	0	0	0	0	0	0
	904	0	0	0	0	0	0	0	0	0	0	0	0	0	0	0	0	0	0	0	0									904	0	0	0	0	0	0	0	0	0	0	0	0	0	0	0	0	0	0	0
	905	0	0	0	0	0	0	0	0	0	0	0	0	0	0	0	0	0	0	0	0									905	0	0	0	0	0	0	0	0	0	0	0	0	0	0	0	0	0	0	0
	906	0	0	0	0	0	0	0	0	0	0	0	0	0	0	0	0	0	0	0	0									906	0	0	0	0	0	0	0	0	0	0	0	0	0	0	0	0	0	0	0
	907	0	0	0	0	0	0	0	0	0	0	0	0	0	0	0	0	0	0	0	0									907	0	0	0	0	0	0	0	0	0	0	0	0	0	0	0	0	0	0	0
	908	0	0	0	0	0	0	0	0	0	0	0	0	0	0	0	0	0	0	0	0									908	0	0	0	0	0	0	0	0	0	0	0	0	0	0	0	0	0	0	0
	909	0	0	0	0	0	0	0	0	0	0	0	0	0	0	0	0	0	0	0	0									909	0	0	0	0	0	0	0	0	0	0	0	0	0	0	0	0	0	0	0
	910	0	0	0	0	0	0	0	0	0	0	0	0	0	0	0	0	0	0	0	0									910	0	0	0	0	0	0	0	0	0	0	0	0	0	0	0	0	0	0	0
	911	0	0	0	0	0	0	0	0	0	0	0	0	0	0	0	0	0	0	0	0									911	0	0	0	0	0	0	0	0	0	0	0	0	0	0	0	0	0	0	0
	912	0	0	0	0	0	0	0	0	0	0	0	0	0	0	0	0	0	0	0	0									912	0	0	0	0	0	0	0	0	0	0	0	0	0	0	0	0	0	0	0
	913	0	0	0	0	0	0	0	0	0	0	0	0	0	0	0	0	0	0	0	0									913	0	0	0	0	0	0	0	0	0	0	0	0	0	0	0	0	0	0	0
	914	0	0	0	0	0	0	0	0	0	0	0	0	0	0	0	0	0	0	0	0									914	0	0	0	0	0	0	0	0	0	0	0	0	0	0	0	0	0	0	0
	915	0	0	0	0	0	0	0	0	0	0	0	0	0	0	0	0	0	0	0	0									915	0	0	0	0	0	0	0	0	0	0	0	0	0	0	0	0	0	0	0
	916	0	0	0	0	0	0	0	0	0	0	0	0	0	0	0	0	0	0	0	0									916	0	0	0	0	0	0	0	0	0	0	0	0	0	0	0	0	0	0	0
	917	0	0	0	0	0	0	0	0	0	0	0	0	0	0	0	0	0	0	0	0									917	0	0	0	0	0	0	0	0	0	0	0	0	0	0	0	0	0	0	0
	918	0	0	0	0	0	0	0	0	0	0	0	0	0	0	0	0	0	0	0	0									918	0	0	0	0	0	0	0	0	0	0	0	0	0	0	0	0	0	0	0
	919	0	0	0	0	0	0	0	0	0	0	0	0	0	0	0	0	0	0	0	0									919	0	0	0	0	0	0	0	0	0	0	0	0	0	0	0	0	0	0	0
	920	0	0	0	0	0	0	0	0	0	0	0	0	0	0	0	0	0	0	0	0									920	0	0	0	0	0	0	0	0	0	0	0	0	0	0	0	0	0	0	0
	921	0	0	0	0	0	0	0	0	0	0	0	0	0	0	0	0	0	0	0	0									921	0	0	0	0	0	0	0	0	0	0	0	0	0	0	0	0	0	0	0
	922	0	0	0	0	0	0	0	0	0	0	0	0	0	0	0	0	0	0	0	0									922	0	0	0	0	0	0	0	0	0	0	0	0	0	0	0	0	0	0	0
	923	0	0	0	0	0	0	0	0	0	0	0	0	0	0	0	0	0	0	0	0									923	0	0	0	0	0	0	0	0	0	0	0	0	0	0	0	0	0	0	0
	924	0	0	0	0	0	0	0	0	0	0	0	0	0	0	0	0	0	0	0	0									924	0	0	0	0	0	0	0	0	0	0	0	0	0	0	0	0	0	0	0
	925	0	0	0	0	0	0	0	0	0	0	0	0	0	0	0	0	0	0	0	0									925	0	0	0	0	0	0	0	0	0	0	0	0	0	0	0	0	0	0	0
	926	0	0	0	0	0	0	0	0	0	0	0	0	0	0	0	0	0	0	0	0									926	0	0	0	0	0	0	0	0	0	0	0	0	0	0	0	0	0	0	0
	927	0	0	0	0	0	0	0	0	0	0	0	0	0	0	0	0	0	0	0	0									927	0	0	0	0	0	0	0	0	0	0	0	0	0	0	0	0	0	0	0
	928	0	0	0	0	0	0	0	0	0	0	0	0	0	0	0	0	0	0	0	0									928	0	0	0	0	0	0	0	0	0	0	0	0	0	0	0	0	0	0	0
	929	0	0	0	0	0	0	0	0	0	0	0	0	0	0	0	0	0	0	0	0									929	0	0	0	0	0	0	0	0	0	0	0	0	0	0	0	0	0	0	0
	930	0	0	0	0	0	0	0	0	0	0	0	0	0	0	0	0	0	0	0	0									930	0	0	0	0	0	0	0	0	0	0	0	0	0	0	0	0	0	0	0
	931	0	0	0	0	0	0	0	0	0	0	0	0	0	0	0	0	0	0	0	0									931	0	0	0	0	0	0	0	0	0	0	0	0	0	0	0	0	0	0	0
	932	0	0	0	0	0	0	0	0	0	0	0	0	0	0	0	0	0	0	0	0									932	0	0	0	0	0	0	0	0	0	0	0	0	0	0	0	0	0	0	0
	933	0	0	0	0	0	0	0	0	0	0	0	0	0	0	0	0	0	0	0	0									933	0	0	0	0	0	0	0	0	0	0	0	0	0	0	0	0	0	0	0
	934	0	0	0	0	0	0	0	0	0	0	0	0	0	0	0	0	0	0	0	0									934	0	0	0	0	0	0	0	0	0	0	0	0	0	0	0	0	0	0	0
	935	0	0	0	0	0	0	0	0	0	0	0	0	0	0	0	0	0	0	0	0									935	0	0	0	0	0	0	0	0	0	0	0	0	0	0	0	0	0	0	0
	936	0	0	0	0	0	0	0	0	0	0	0	0	0	0	0	0	0	0	0	0									936	0	0	0	0	0	0	0	0	0	0	0	0	0	0	0	0	0	0	0
	937	0	0	0	0	0	0	0	0	0	0	0	0	0	0	0	0	0	0	0	0									937	0	0	0	0	0	0	0	0	0	0	0	0	0	0	0	0	0	0	0
	938	0	0	0	0	0	0	0	0	0	0	0	0	0	0	0	0	0	0	0	0									938	0	0	0	0	0	0	0	0	0	0	0	0	0	0	0	0	0	0	0
	939	0	0	0	0	0	0	0	0	0	0	0	0	0	0	0	0	0	0	0	0									939	0	0	0	0	0	0	0	0	0	0	0	0	0	0	0	0	0	0	0
	940	0	0	0	0	0	0	0	0	0	0	0	0	0	0	0	0	0	0	0	0									940	0	0	0	0	0	0	0	0	0	0	0	0	0	0	0	0	0	0	0
	941	0	0	0	0	0	0	0	0	0	0	0	0	0	0	0	0	0	0	0	0									941	0	0	0	0	0	0	0	0	0	0	0	0	0	0	0	0	0	0	0
	942	0	0	0	0	0	0	0	0	0	0	0	0	0	0	0	0	0	0	0	0									942	0	0	0	0	0	0	0	0	0	0	0	0	0	0	0	0	0	0	0
	943	0	0	0	0	0	0	0	0	0	0	0	0	0	0	0	0	0	0	0	0									943	0	0	0	0	0	0	0	0	0	0	0	0	0	0	0	0	0	0	0
	944	0	0	0	0	0	0	0	0	0	0	0	0	0	0	0	0	0	0	0	0									944	0	0	0	0	0	0	0	0	0	0	0	0	0	0	0	0	0	0	0
	945	0	0	0	0	0	0	0	0	0	0	0	0	0	0	0	0	0	0	0	0									945	0	0	0	0	0	0	0	0	0	0	0	0	0	0	0	0	0	0	0
	946	0	0	0	0	0	0	0	0	0	0	0	0	0	0	0	0	0	0	0	0									946	0	0	0	0	0	0	0	0	0	0	0	0	0	0	0	0	0	0	0
	947	0	0	0	0	0	0	0	0	0	0	0	0	0	0	0	0	0	0	0	0									947	0	0	0	0	0	0	0	0	0	0	0	0	0	0	0	0	0	0	0
	948	0	0	0	0	0	0	0	0	0	0	0	0	0	0	0	0	0	0	0	0									948	0	0	0	0	0	0	0	0	0	0	0	0	0	0	0	0	0	0	0
	949	0	0	0	0	0	0	0	0	0	0	0	0	0	0	0	0	0	0	0	0									949	0	0	0	0	0	0	0	0	0	0	0	0	0	0	0	0	0	0	0
	950	0	0	0	0	0	0	0	0	0	0	0	0	0	0	0	0	0	0	0	0									950	0	0	0	0	0	0	0	0	0	0	0	0	0	0	0	0	0	0	0
	951	0	0	0	0	0	0	0	0	0	0	0	0	0	0	0	0	0	0	0	0									951	0	0	0	0	0	0	0	0	0	0	0	0	0	0	0	0	0	0	0
	952	0	0	0	0	0	0	0	0	0	0	0	0	0	0	0	0	0	0	0	0									952	0	0	0	0	0	0	0	0	0	0	0	0	0	0	0	0	0	0	0
	953	0	0	0	0	0	0	0	0	0	0	0	0	0	0	0	0	0	0	0	0									953	0	0	0	0	0	0	0	0	0	0	0	0	0	0	0	0	0	0	0
	954	0	0	0	0	0	0	0	0	0	0	0	0	0	0	0	0	0	0	0	0									954	0	0	0	0	0	0	0	0	0	0	0	0	0	0	0	0	0	0	0
	955	0	0	0	0	0	0	0	0	0	0	0	0	0	0	0	0	0	0	0	0									955	0	0	0	0	0	0	0	0	0	0	0	0	0	0	0	0	0	0	0
	956	0	0	0	0	0	0	0	0	0	0	0	0	0	0	0	0	0	0	0	0									956	0	0	0	0	0	0	0	0	0	0	0	0	0	0	0	0	0	0	0
	957	0	0	0	0	0	0	0	0	0	0	0	0	0	0	0	0	0	0	0	0									957	0	0	0	0	0	0	0	0	0	0	0	0	0	0	0	0	0	0	0
	958	0	0	0	0	0	0	0	0	0	0	0	0	0	0	0	0	0	0	0	0									958	0	0	0	0	0	0	0	0	0	0	0	0	0	0	0	0	0	0	0
	959	0	0	0	0	0	0	0	0	0	0	0	0	0	0	0	0	0	0	0	0									959	0	0	0	0	0	0	0	0	0	0	0	0	0	0	0	0	0	0	0
	960	0	0	0	0	0	0	0	0	0	0	0	0	0	0	0	0	0	0	0	0									960	0	0	0	0	0	0	0	0	0	0	0	0	0	0	0	0	0	0	0
	961	0	0	0	0	0	0	0	0	0	0	0	0	0	0	0	0	0	0	0	0									961	0	0	0	0	0	0	0	0	0	0	0	0	0	0	0	0	0	0	0
	962	0	0	0	0	0	0	0	0	0	0	0	0	0	0	0	0	0	0	0	0									962	0	0	0	0	0	0	0	0	0	0	0	0	0	0	0	0	0	0	0
	963	0	0	0	0	0	0	0	0	0	0	0	0	0	0	0	0	0	0	0	0									963	0	0	0	0	0	0	0	0	0	0	0	0	0	0	0	0	0	0	0
	964	0	0	0	0	0	0	0	0	0	0	0	0	0	0	0	0	0	0	0	0									964	0	0	0	0	0	0	0	0	0	0	0	0	0	0	0	0	0	0	0
	965	0	0	0	0	0	0	0	0	0	0	0	0	0	0	0	0	0	0	0	0									965	0	0	0	0	0	0	0	0	0	0	0	0	0	0	0	0	0	0	0
	966	0	0	0	0	0	0	0	0	0	0	0	0	0	0	0	0	0	0	0	0									966	0	0	0	0	0	0	0	0	0	0	0	0	0	0	0	0	0	0	0
	967	0	0	0	0	0	0	0	0	0	0	0	0	0	0	0	0	0	0	0	0									967	0	0	0	0	0	0	0	0	0	0	0	0	0	0	0	0	0	0	0
	968	0	0	0	0	0	0	0	0	0	0	0	0	0	0	0	0	0	0	0	0									968	0	0	0	0	0	0	0	0	0	0	0	0	0	0	0	0	0	0	0
	969	0	0	0	0	0	0	0	0	0	0	0	0	0	0	0	0	0	0	0	0									969	0	0	0	0	0	0	0	0	0	0	0	0	0	0	0	0	0	0	0
	970	0	0	0	0	0	0	0	0	0	0	0	0	0	0	0	0	0	0	0	0									970	0	0	0	0	0	0	0	0	0	0	0	0	0	0	0	0	0	0	0
	971	0	0	0	0	0	0	0	0	0	0	0	0	0	0	0	0	0	0	0	0									971	0	0	0	0	0	0	0	0	0	0	0	0	0	0	0	0	0	0	0
	972	0	0	0	0	0	0	0	0	0	0	0	0	0	0	0	0	0	0	0	0									972	0	0	0	0	0	0	0	0	0	0	0	0	0	0	0	0	0	0	0
	973	0	0	0	0	0	0	0	0	0	0	0	0	0	0	0	0	0	0	0	0									973	0	0	0	0	0	0	0	0	0	0	0	0	0	0	0	0	0	0	0
	974	0	0	0	0	0	0	0	0	0	0	0	0	0	0	0	0	0	0	0	0									974	0	0	0	0	0	0	0	0	0	0	0	0	0	0	0	0	0	0	0
	975	0	0	0	0	0	0	0	0	0	0	0	0	0	0	0	0	0	0	0	0									975	0	0	0	0	0	0	0	0	0	0	0	0	0	0	0	0	0	0	0
	976	0	0	0	0	0	0	0	0	0	0	0	0	0	0	0	0	0	0	0	0									976	0	0	0	0	0	0	0	0	0	0	0	0	0	0	0	0	0	0	0
	977	0	0	0	0	0	0	0	0	0	0	0	0	0	0	0	0	0	0	0	0									977	0	0	0	0	0	0	0	0	0	0	0	0	0	0	0	0	0	0	0
	978	0	0	0	0	0	0	0	0	0	0	0	0	0	0	0	0	0	0	0	0									978	0	0	0	0	0	0	0	0	0	0	0	0	0	0	0	0	0	0	0
	979	0	0	0	0	0	0	0	0	0	0	0	0	0	0	0	0	0	0	0	0									979	0	0	0	0	0	0	0	0	0	0	0	0	0	0	0	0	0	0	0
	980	0	0	0	0	0	0	0	0	0	0	0	0	0	0	0	0	0	0	0	0									980	0	0	0	0	0	0	0	0	0	0	0	0	0	0	0	0	0	0	0
	981	0	0	0	0	0	0	0	0	0	0	0	0	0	0	0	0	0	0	0	0									981	0	0	0	0	0	0	0	0	0	0	0	0	0	0	0	0	0	0	0
	982	0	0	0	0	0	0	0	0	0	0	0	0	0	0	0	0	0	0	0	0									982	0	0	0	0	0	0	0	0	0	0	0	0	0	0	0	0	0	0	0
	983	0	0	0	0	0	0	0	0	0	0	0	0	0	0	0	0	0	0	0	0									983	0	0	0	0	0	0	0	0	0	0	0	0	0	0	0	0	0	0	0
	984	0	0	0	0	0	0	0	0	0	0	0	0	0	0	0	0	0	0	0	0									984	0	0	0	0	0	0	0	0	0	0	0	0	0	0	0	0	0	0	0
	985	0	0	0	0	0	0	0	0	0	0	0	0	0	0	0	0	0	0	0	0									985	0	0	0	0	0	0	0	0	0	0	0	0	0	0	0	0	0	0	0
	986	0	0	0	0	0	0	0	0	0	0	0	0	0	0	0	0	0	0	0	0									986	0	0	0	0	0	0	0	0	0	0	0	0	0	0	0	0	0	0	0
	987	0	0	0	0	0	0	0	0	0	0	0	0	0	0	0	0	0	0	0	0									987	0	0	0	0	0	0	0	0	0	0	0	0	0	0	0	0	0	0	0
	988	0	0	0	0	0	0	0	0	0	0	0	0	0	0	0	0	0	0	0	0									988	0	0	0	0	0	0	0	0	0	0	0	0	0	0	0	0	0	0	0
	989	0	0	0	0	0	0	0	0	0	0	0	0	0	0	0	0	0	0	0	0									989	0	0	0	0	0	0	0	0	0	0	0	0	0	0	0	0	0	0	0
	990	0	0	0	0	0	0	0	0	0	0	0	0	0	0	0	0	0	0	0	0									990	0	0	0	0	0	0	0	0	0	0	0	0	0	0	0	0	0	0	0
	991	0	0	0	0	0	0	0	0	0	0	0	0	0	0	0	0	0	0	0	0									991	0	0	0	0	0	0	0	0	0	0	0	0	0	0	0	0	0	0	0
	992	0	0	0	0	0	0	0	0	0	0	0	0	0	0	0	0	0	0	0	0									992	0	0	0	0	0	0	0	0	0	0	0	0	0	0	0	0	0	0	0
	993	0	0	0	0	0	0	0	0	0	0	0	0	0	0	0	0	0	0	0	0									993	0	0	0	0	0	0	0	0	0	0	0	0	0	0	0	0	0	0	0
	994	0	0	0	0	0	0	0	0	0	0	0	0	0	0	0	0	0	0	0	0									994	0	0	0	0	0	0	0	0	0	0	0	0	0	0	0	0	0	0	0
	995	0	0	0	0	0	0	0	0	0	0	0	0	0	0	0	0	0	0	0	0									995	0	0	0	0	0	0	0	0	0	0	0	0	0	0	0	0	0	0	0
	996	0	0	0	0	0	0	0	0	0	0	0	0	0	0	0	0	0	0	0	0									996	0	0	0	0	0	0	0	0	0	0	0	0	0	0	0	0	0	0	0
	997	0	0	0	0	0	0	0	0	0	0	0	0	0	0	0	0	0	0	0	0									997	0	0	0	0	0	0	0	0	0	0	0	0	0	0	0	0	0	0	0
	998	0	0	0	0	0	0	0	0	0	0	0	0	0	0	0	0	0	0	0	0									998	0	0	0	0	0	0	0	0	0	0	0	0	0	0	0	0	0	0	0
	999	0	0	0	0	0	0	0	0	0	0	0	0	0	0	0	0	0	0	0	0									999	0	0	0	0	0	0	0	0	0	0	0	0	0	0	0	0	0	0	0
	1000	0	0	0	0	0	0	0	0	0	0	0	0	0	0	0	0	0	0	0	0									1000	0	0	0	0	0	0	0	0	0	0	0	0	0	0	0	0	0	0	0
	1001	0	0	0	0	0	0	0	0	0	0	0	0	0	0	0	0	0	0	0	0									1001	0	0	0	0	0	0	0	0	0	0	0	0	0	0	0	0	0	0	0
	1002	0	0	0	0	0	0	0	0	0	0	0	0	0	0	0	0	0	0	0	0									1002	0	0	0	0	0	0	0	0	0	0	0	0	0	0	0	0	0	0	0
	1003	0	0	0	0	0	0	0	0	0	0	0	0	0	0	0	0	0	0	0	0									1003	0	0	0	0	0	0	0	0	0	0	0	0	0	0	0	0	0	0	0
	1004	0	0	0	0	0	0	0	0	0	0	0	0	0	0	0	0	0	0	0	0									1004	0	0	0	0	0	0	0	0	0	0	0	0	0	0	0	0	0	0	0
	1005	0	0	0	0	0	0	0	0	0	0	0	0	0	0	0	0	0	0	0	0									1005	0	0	0	0	0	0	0	0	0	0	0	0	0	0	0	0	0	0	0
	1006	0	0	0	0	0	0	0	0	0	0	0	0	0	0	0	0	0	0	0	0									1006	0	0	0	0	0	0	0	0	0	0	0	0	0	0	0	0	0	0	0
	1007	0	0	0	0	0	0	0	0	0	0	0	0	0	0	0	0	0	0	0	0									1007	0	0	0	0	0	0	0	0	0	0	0	0	0	0	0	0	0	0	0
	1008	0	0	0	0	0	0	0	0	0	0	0	0	0	0	0	0	0	0	0	0									1008	0	0	0	0	0	0	0	0	0	0	0	0	0	0	0	0	0	0	0
	1009	0	0	0	0	0	0	0	0	0	0	0	0	0	0	0	0	0	0	0	0									1009	0	0	0	0	0	0	0	0	0	0	0	0	0	0	0	0	0	0	0
	1010	0	0	0	0	0	0	0	0	0	0	0	0	0	0	0	0	0	0	0	0									1010	0	0	0	0	0	0	0	0	0	0	0	0	0	0	0	0	0	0	0
	1011	0	0	0	0	0	0	0	0	0	0	0	0	0	0	0	0	0	0	0	0									1011	0	0	0	0	0	0	0	0	0	0	0	0	0	0	0	0	0	0	0
	1012	0	0	0	0	0	0	0	0	0	0	0	0	0	0	0	0	0	0	0	0									1012	0	0	0	0	0	0	0	0	0	0	0	0	0	0	0	0	0	0	0
	1013	0	0	0	0	0	0	0	0	0	0	0	0	0	0	0	0	0	0	0	0									1013	0	0	0	0	0	0	0	0	0	0	0	0	0	0	0	0	0	0	0
	1014	0	0	0	0	0	0	0	0	0	0	0	0	0	0	0	0	0	0	0	0									1014	0	0	0	0	0	0	0	0	0	0	0	0	0	0	0	0	0	0	0
	1015	0	0	0	0	0	0	0	0	0	0	0	0	0	0	0	0	0	0	0	0									1015	0	0	0	0	0	0	0	0	0	0	0	0	0	0	0	0	0	0	0
	1016	0	0	0	0	0	0	0	0	0	0	0	0	0	0	0	0	0	0	0	0									1016	0	0	0	0	0	0	0	0	0	0	0	0	0	0	0	0	0	0	0
	1017	0	0	0	0	0	0	0	0	0	0	0	0	0	0	0	0	0	0	0	0									1017	0	0	0	0	0	0	0	0	0	0	0	0	0	0	0	0	0	0	0
	1018	0	0	0	0	0	0	0	0	0	0	0	0	0	0	0	0	0	0	0	0									1018	0	0	0	0	0	0	0	0	0	0	0	0	0	0	0	0	0	0	0
	1019	0	0	0	0	0	0	0	0	0	0	0	0	0	0	0	0	0	0	0	0									1019	0	0	0	0	0	0	0	0	0	0	0	0	0	0	0	0	0	0	0
	1020	0	0	0	0	0	0	0	0	0	0	0	0	0	0	0	0	0	0	0	0									1020	0	0	0	0	0	0	0	0	0	0	0	0	0	0	0	0	0	0	0
	1021	0	0	0	0	0	0	0	0	0	0	0	0	0	0	0	0	0	0	0	0									1021	0	0	0	0	0	0	0	0	0	0	0	0	0	0	0	0	0	0	0
	1022	0	0	0	0	0	0	0	0	0	0	0	0	0	0	0	0	0	0	0	0									1022	0	0	0	0	0	0	0	0	0	0	0	0	0	0	0	0	0	0	0
	1023	0	0	0	0	0	0	0	0	0	0	0	0	0	0	0	0	0	0	0	0									1023	0	0	0	0	0	0	0	0	0	0	0	0	0	0	0	0	0	0	0
	1024	0	0	0	0	0	0	0	0	0	0	0	0	0	0	0	0	0	0	0	0									1024	0	0	0	0	0	0	0	0	0	0	0	0	0	0	0	0	0	0	0
	1025	0	0	0	0	0	0	0	0	0	0	0	0	0	0	0	0	0	0	0	0									1025	0	0	0	0	0	0	0	0	0	0	0	0	0	0	0	0	0	0	0
	1026	0	0	0	0	0	0	0	0	0	0	0	0	0	0	0	0	0	0	0	0									1026	0	0	0	0	0	0	0	0	0	0	0	0	0	0	0	0	0	0	0
	1027	0	0	0	0	0	0	0	0	0	0	0	0	0	0	0	0	0	0	0	0									1027	0	0	0	0	0	0	0	0	0	0	0	0	0	0	0	0	0	0	0
	1028	0	0	0	0	0	0	0	0	0	0	0	0	0	0	0	0	0	0	0	0									1028	0	0	0	0	0	0	0	0	0	0	0	0	0	0	0	0	0	0	0
	1029	0	0	0	0	0	0	0	0	0	0	0	0	0	0	0	0	0	0	0	0									1029	0	0	0	0	0	0	0	0	0	0	0	0	0	0	0	0	0	0	0
	1030	0	0	0	0	0	0	0	0	0	0	0	0	0	0	0	0	0	0	0	0									1030	0	0	0	0	0	0	0	0	0	0	0	0	0	0	0	0	0	0	0
	1031	0	0	0	0	0	0	0	0	0	0	0	0	0	0	0	0	0	0	0	0									1031	0	0	0	0	0	0	0	0	0	0	0	0	0	0	0	0	0	0	0
	1032	0	0	0	0	0	0	0	0	0	0	0	0	0	0	0	0	0	0	0	0									1032	0	0	0	0	0	0	0	0	0	0	0	0	0	0	0	0	0	0	0
	1033	0	0	0	0	0	0	0	0	0	0	0	0	0	0	0	0	0	0	0	0									1033	0	0	0	0	0	0	0	0	0	0	0	0	0	0	0	0	0	0	0
	1034	0	0	0	0	0	0	0	0	0	0	0	0	0	0	0	0	0	0	0	0									1034	0	0	0	0	0	0	0	0	0	0	0	0	0	0	0	0	0	0	0
	1035	0	0	0	0	0	0	0	0	0	0	0	0	0	0	0	0	0	0	0	0									1035	0	0	0	0	0	0	0	0	0	0	0	0	0	0	0	0	0	0	0
	1036	0	0	0	0	0	0	0	0	0	0	0	0	0	0	0	0	0	0	0	0									1036	0	0	0	0	0	0	0	0	0	0	0	0	0	0	0	0	0	0	0
	1037	0	0	0	0	0	0	0	0	0	0	0	0	0	0	0	0	0	0	0	0									1037	0	0	0	0	0	0	0	0	0	0	0	0	0	0	0	0	0	0	0
	1038	0	0	0	0	0	0	0	0	0	0	0	0	0	0	0	0	0	0	0	0									1038	0	0	0	0	0	0	0	0	0	0	0	0	0	0	0	0	0	0	0
	1039	0	0	0	0	0	0	0	0	0	0	0	0	0	0	0	0	0	0	0	0									1039	0	0	0	0	0	0	0	0	0	0	0	0	0	0	0	0	0	0	0
	1040	0	0	0	0	0	0	0	0	0	0	0	0	0	0	0	0	0	0	0	0									1040	0	0	0	0	0	0	0	0	0	0	0	0	0	0	0	0	0	0	0
	1041	0	0	0	0	0	0	0	0	0	0	0	0	0	0	0	0	0	0	0	0									1041	0	0	0	0	0	0	0	0	0	0	0	0	0	0	0	0	0	0	0
	1042	0	0	0	0	0	0	0	0	0	0	0	0	0	0	0	0	0	0	0	0									1042	0	0	0	0	0	0	0	0	0	0	0	0	0	0	0	0	0	0	0
	1043	0	0	0	0	0	0	0	0	0	0	0	0	0	0	0	0	0	0	0	0									1043	0	0	0	0	0	0	0	0	0	0	0	0	0	0	0	0	0	0	0
	1044	0	0	0	0	0	0	0	0	0	0	0	0	0	0	0	0	0	0	0	0									1044	0	0	0	0	0	0	0	0	0	0	0	0	0	0	0	0	0	0	0
	1045	0	0	0	0	0	0	0	0	0	0	0	0	0	0	0	0	0	0	0	0									1045	0	0	0	0	0	0	0	0	0	0	0	0	0	0	0	0	0	0	0
	1046	0	0	0	0	0	0	0	0	0	0	0	0	0	0	0	0	0	0	0	0									1046	0	0	0	0	0	0	0	0	0	0	0	0	0	0	0	0	0	0	0
	1047	0	0	0	0	0	0	0	0	0	0	0	0	0	0	0	0	0	0	0	0									1047	0	0	0	0	0	0	0	0	0	0	0	0	0	0	0	0	0	0	0
	1048	0	0	0	0	0	0	0	0	0	0	0	0	0	0	0	0	0	0	0	0									1048	0	0	0	0	0	0	0	0	0	0	0	0	0	0	0	0	0	0	0
	1049	0	0	0	0	0	0	0	0	0	0	0	0	0	0	0	0	0	0	0	0									1049	0	0	0	0	0	0	0	0	0	0	0	0	0	0	0	0	0	0	0
	1050	0	0	0	0	0	0	0	0	0	0	0	0	0	0	0	0	0	0	0	0									1050	0	0	0	0	0	0	0	0	0	0	0	0	0	0	0	0	0	0	0
	1051	0	0	0	0	0	0	0	0	0	0	0	0	0	0	0	0	0	0	0	0									1051	0	0	0	0	0	0	0	0	0	0	0	0	0	0	0	0	0	0	0
	1052	0	0	0	0	0	0	0	0	0	0	0	0	0	0	0	0	0	0	0	0									1052	0	0	0	0	0	0	0	0	0	0	0	0	0	0	0	0	0	0	0
	1053	0	0	0	0	0	0	0	0	0	0	0	0	0	0	0	0	0	0	0	0									1053	0	0	0	0	0	0	0	0	0	0	0	0	0	0	0	0	0	0	0
	1054	0	0	0	0	0	0	0	0	0	0	0	0	0	0	0	0	0	0	0	0									1054	0	0	0	0	0	0	0	0	0	0	0	0	0	0	0	0	0	0	0
	1055	0	0	0	0	0	0	0	0	0	0	0	0	0	0	0	0	0	0	0	0									1055	0	0	0	0	0	0	0	0	0	0	0	0	0	0	0	0	0	0	0
	1056	0	0	0	0	0	0	0	0	0	0	0	0	0	0	0	0	0	0	0	0									1056	0	0	0	0	0	0	0	0	0	0	0	0	0	0	0	0	0	0	0
	1057	0	0	0	0	0	0	0	0	0	0	0	0	0	0	0	0	0	0	0	0									1057	0	0	0	0	0	0	0	0	0	0	0	0	0	0	0	0	0	0	0
	1058	0	0	0	0	0	0	0	0	0	0	0	0	0	0	0	0	0	0	0	0									1058	0	0	0	0	0	0	0	0	0	0	0	0	0	0	0	0	0	0	0
	1059	0	0	0	0	0	0	0	0	0	0	0	0	0	0	0	0	0	0	0	0									1059	0	0	0	0	0	0	0	0	0	0	0	0	0	0	0	0	0	0	0
	1060	0	0	0	0	0	0	0	0	0	0	0	0	0	0	0	0	0	0	0	0									1060	0	0	0	0	0	0	0	0	0	0	0	0	0	0	0	0	0	0	0
	1061	0	0	0	0	0	0	0	0	0	0	0	0	0	0	0	0	0	0	0	0									1061	0	0	0	0	0	0	0	0	0	0	0	0	0	0	0	0	0	0	0
	1062	0	0	0	0	0	0	0	0	0	0	0	0	0	0	0	0	0	0	0	0									1062	0	0	0	0	0	0	0	0	0	0	0	0	0	0	0	0	0	0	0
	1063	0	0	0	0	0	0	0	0	0	0	0	0	0	0	0	0	0	0	0	0									1063	0	0	0	0	0	0	0	0	0	0	0	0	0	0	0	0	0	0	0
	1064	0	0	0	0	0	0	0	0	0	0	0	0	0	0	0	0	0	0	0	0									1064	0	0	0	0	0	0	0	0	0	0	0	0	0	0	0	0	0	0	0
	1065	0	0	0	0	0	0	0	0	0	0	0	0	0	0	0	0	0	0	0	0									1065	0	0	0	0	0	0	0	0	0	0	0	0	0	0	0	0	0	0	0
	1066	0	0	0	0	0	0	0	0	0	0	0	0	0	0	0	0	0	0	0	0									1066	0	0	0	0	0	0	0	0	0	0	0	0	0	0	0	0	0	0	0
	1067	0	0	0	0	0	0	0	0	0	0	0	0	0	0	0	0	0	0	0	0									1067	0	0	0	0	0	0	0	0	0	0	0	0	0	0	0	0	0	0	0
	1068	0	0	0	0	0	0	0	0	0	0	0	0	0	0	0	0	0	0	0	0									1068	0	0	0	0	0	0	0	0	0	0	0	0	0	0	0	0	0	0	0
	1069	0	0	0	0	0	0	0	0	0	0	0	0	0	0	0	0	0	0	0	0									1069	0	0	0	0	0	0	0	0	0	0	0	0	0	0	0	0	0	0	0
	1070	0	0	0	0	0	0	0	0	0	0	0	0	0	0	0	0	0	0	0	0
	1071	0	0	0	0	0	0	0	0	0	0	0	0	0	0	0	0	0	0	0	0
	1072	0	0	0	0	0	0	0	0	0	0	0	0	0	0	0	0	0	0	0	0
	1073	0	0	0	0	0	0	0	0	0	0	0	0	0	0	0	0	0	0	0	0
	1074	0	0	0	0	0	0	0	0	0	0	0	0	0	0	0	0	0	0	0	0
	1075	0	0	0	0	0	0	0	0	0	0	0	0	0	0	0	0	0	0	0	0
	1076	0	0	0	0	0	0	0	0	0	0	0	0	0	0	0	0	0	0	0	0
	1077	0	0	0	0	0	0	0	0	0	0	0	0	0	0	0	0	0	0	0	0
	1078	0	0	0	0	0	0	0	0	0	0	0	0	0	0	0	0	0	0	0	0
	1079	0	0	0	0	0	0	0	0	0	0	0	0	0	0	0	0	0	0	0	0
	1080	0	0	0	0	0	0	0	0	0	0	0	0	0	0	0	0	0	0	0	0
	1081	0	0	0	0	0	0	0	0	0	0	0	0	0	0	0	0	0	0	0	0
	1082	0	0	0	0	0	0	0	0	0	0	0	0	0	0	0	0	0	0	0	0
	1083	0	0	0	0	0	0	0	0	0	0	0	0	0	0	0	0	0	0	0	0
	1084	0	0	0	0	0	0	0	0	0	0	0	0	0	0	0	0	0	0	0	0
	1085	0	0	0	0	0	0	0	0	0	0	0	0	0	0	0	0	0	0	0	0
	1086	0	0	0	0	0	0	0	0	0	0	0	0	0	0	0	0	0	0	0	0
	1087	0	0	0	0	0	0	0	0	0	0	0	0	0	0	0	0	0	0	0	0
	1088	0	0	0	0	0	0	0	0	0	0	0	0	0	0	0	0	0	0	0	0
	1089	0	0	0	0	0	0	0	0	0	0	0	0	0	0	0	0	0	0	0	0
	1090	0	0	0	0	0	0	0	0	0	0	0	0	0	0	0	0	0	0	0	0
	1091	0	0	0	0	0	0	0	0	0	0	0	0	0	0	0	0	0	0	0	0
	1092	0	0	0	0	0	0	0	0	0	0	0	0	0	0	0	0	0	0	0	0
	1093	0	0	0	0	0	0	0	0	0	0	0	0	0	0	0	0	0	0	0	0
	1094	0	0	0	0	0	0	0	0	0	0	0	0	0	0	0	0	0	0	0	0
	1095	0	0	0	0	0	0	0	0	0	0	0	0	0	0	0	0	0	0	0	0
	1096	0	0	0	0	0	0	0	0	0	0	0	0	0	0	0	0	0	0	0	0
	1097	0	0	0	0	0	0	0	0	0	0	0	0	0	0	0	0	0	0	0	0
	1098	0	0	0	0	0	0	0	0	0	0	0	0	0	0	0	0	0	0	0	0
	1099	0	0	0	0	0	0	0	0	0	0	0	0	0	0	0	0	0	0	0	0
	1100	0	0	0	0	0	0	0	0	0	0	0	0	0	0	0	0	0	0	0	0
	1101	0	0	0	0	0	0	0	0	0	0	0	0	0	0	0	0	0	0	0	0
	1102	0	0	0	0	0	0	0	0	0	0	0	0	0	0	0	0	0	0	0	0
	1103	0	0	0	0	0	0	0	0	0	0	0	0	0	0	0	0	0	0	0	0
	1104	0	0	0	0	0	0	0	0	0	0	0	0	0	0	0	0	0	0	0	0
	1105	0	0	0	0	0	0	0	0	0	0	0	0	0	0	0	0	0	0	0	0
	1106	0	0	0	0	0	0	0	0	0	0	0	0	0	0	0	0	0	0	0	0
	1107	0	0	0	0	0	0	0	0	0	0	0	0	0	0	0	0	0	0	0	0
	1108	0	0	0	0	0	0	0	0	0	0	0	0	0	0	0	0	0	0	0	0
	1109	0	0	0	0	0	0	0	0	0	0	0	0	0	0	0	0	0	0	0	0
	1110	0	0	0	0	0	0	0	0	0	0	0	0	0	0	0	0	0	0	0	0
	1111	0	0	0	0	0	0	0	0	0	0	0	0	0	0	0	0	0	0	0	0
	1112	0	0	0	0	0	0	0	0	0	0	0	0	0	0	0	0	0	0	0	0
	1113	0	0	0	0	0	0	0	0	0	0	0	0	0	0	0	0	0	0	0	0
	1114	0	0	0	0	0	0	0	0	0	0	0	0	0	0	0	0	0	0	0	0
	1115	0	0	0	0	0	0	0	0	0	0	0	0	0	0	0	0	0	0	0	0
	1116	0	0	0	0	0	0	0	0	0	0	0	0	0	0	0	0	0	0	0	0
	1117	0	0	0	0	0	0	0	0	0	0	0	0	0	0	0	0	0	0	0	0
	1118	0	0	0	0	0	0	0	0	0	0	0	0	0	0	0	0	0	0	0	0
	1119	0	0	0	0	0	0	0	0	0	0	0	0	0	0	0	0	0	0	0	0
	1120	0	0	0	0	0	0	0	0	0	0	0	0	0	0	0	0	0	0	0	0
	1121	0	0	0	0	0	0	0	0	0	0	0	0	0	0	0	0	0	0	0	0
	1122	0	0	0	0	0	0	0	0	0	0	0	0	0	0	0	0	0	0	0	0
	1123	0	0	0	0	0	0	0	0	0	0	0	0	0	0	0	0	0	0	0	0
	1124	0	0	0	0	0	0	0	0	0	0	0	0	0	0	0	0	0	0	0	0
	1125	0	0	0	0	0	0	0	0	0	0	0	0	0	0	0	0	0	0	0	0
	1126	0	0	0	0	0	0	0	0	0	0	0	0	0	0	0	0	0	0	0	0
	1127	0	0	0	0	0	0	0	0	0	0	0	0	0	0	0	0	0	0	0	0
	1128	0	0	0	0	0	0	0	0	0	0	0	0	0	0	0	0	0	0	0	0
	1129	0	0	0	0	0	0	0	0	0	0	0	0	0	0	0	0	0	0	0	0
	1130	0	0	0	0	0	0	0	0	0	0	0	0	0	0	0	0	0	0	0	0
	1131	0	0	0	0	0	0	0	0	0	0	0	0	0	0	0	0	0	0	0	0
	1132	0	0	0	0	0	0	0	0	0	0	0	0	0	0	0	0	0	0	0	0
	1133	0	0	0	0	0	0	0	0	0	0	0	0	0	0	0	0	0	0	0	0
	1134	0	0	0	0	0	0	0	0	0	0	0	0	0	0	0	0	0	0	0	0
	1135	0	0	0	0	0	0	0	0	0	0	0	0	0	0	0	0	0	0	0	0
	1136	0	0	0	0	0	0	0	0	0	0	0	0	0	0	0	0	0	0	0	0
	1137	0	0	0	0	0	0	0	0	0	0	0	0	0	0	0	0	0	0	0	0
	1138	0	0	0	0	0	0	0	0	0	0	0	0	0	0	0	0	0	0	0	0
	1139	0	0	0	0	0	0	0	0	0	0	0	0	0	0	0	0	0	0	0	0
	1140	0	0	0	0	0	0	0	0	0	0	0	0	0	0	0	0	0	0	0	0
	1141	0	0	0	0	0	0	0	0	0	0	0	0	0	0	0	0	0	0	0	0
	1142	0	0	0	0	0	0	0	0	0	0	0	0	0	0	0	0	0	0	0	0
	1143	0	0	0	0	0	0	0	0	0	0	0	0	0	0	0	0	0	0	0	0
	1144	0	0	0	0	0	0	0	0	0	0	0	0	0	0	0	0	0	0	0	0
	1145	0	0	0	0	0	0	0	0	0	0	0	0	0	0	0	0	0	0	0	0
	1146	0	0	0	0	0	0	0	0	0	0	0	0	0	0	0	0	0	0	0	0
	1147	0	0	0	0	0	0	0	0	0	0	0	0	0	0	0	0	0	0	0	0
	1148	0	0	0	0	0	0	0	0	0	0	0	0	0	0	0	0	0	0	0	0
	1149	0	0	0	0	0	0	0	0	0	0	0	0	0	0	0	0	0	0	0	0
	1150	0	0	0	0	0	0	0	0	0	0	0	0	0	0	0	0	0	0	0	0
	1151	0	0	0	0	0	0	0	0	0	0	0	0	0	0	0	0	0	0	0	0
	1152	0	0	0	0	0	0	0	0	0	0	0	0	0	0	0	0	0	0	0	0
	1153	0	0	0	0	0	0	0	0	0	0	0	0	0	0	0	0	0	0	0	0
	1154	0	0	0	0	0	0	0	0	0	0	0	0	0	0	0	0	0	0	0	0
	1155	0	0	0	0	0	0	0	0	0	0	0	0	0	0	0	0	0	0	0	0
	1156	0	0	0	0	0	0	0	0	0	0	0	0	0	0	0	0	0	0	0	0
	1157	0	0	0	0	0	0	0	0	0	0	0	0	0	0	0	0	0	0	0	0
	1158	0	0	0	0	0	0	0	0	0	0	0	0	0	0	0	0	0	0	0	0
	1159	0	0	0	0	0	0	0	0	0	0	0	0	0	0	0	0	0	0	0	0
	1160	0	0	0	0	0	0	0	0	0	0	0	0	0	0	0	0	0	0	0	0
	1161	0	0	0	0	0	0	0	0	0	0	0	0	0	0	0	0	0	0	0	0
	1162	0	0	0	0	0	0	0	0	0	0	0	0	0	0	0	0	0	0	0	0
	1163	0	0	0	0	0	0	0	0	0	0	0	0	0	0	0	0	0	0	0	0
	1164	0	0	0	0	0	0	0	0	0	0	0	0	0	0	0	0	0	0	0	0
	1165	0	0	0	0	0	0	0	0	0	0	0	0	0	0	0	0	0	0	0	0
	1166	0	0	0	0	0	0	0	0	0	0	0	0	0	0	0	0	0	0	0	0
	1167	0	0	0	0	0	0	0	0	0	0	0	0	0	0	0	0	0	0	0	0
	1168	0	0	0	0	0	0	0	0	0	0	0	0	0	0	0	0	0	0	0	0
	1169	0	0	0	0	0	0	0	0	0	0	0	0	0	0	0	0	0	0	0	0
	1170	0	0	0	0	0	0	0	0	0	0	0	0	0	0	0	0	0	0	0	0
	1171	0	0	0	0	0	0	0	0	0	0	0	0	0	0	0	0	0	0	0	0
	1172	0	0	0	0	0	0	0	0	0	0	0	0	0	0	0	0	0	0	0	0
	1173	0	0	0	0	0	0	0	0	0	0	0	0	0	0	0	0	0	0	0	0
	1174	0	0	0	0	0	0	0	0	0	0	0	0	0	0	0	0	0	0	0	0
	1175	0	0	0	0	0	0	0	0	0	0	0	0	0	0	0	0	0	0	0	0
	1176	0	0	0	0	0	0	0	0	0	0	0	0	0	0	0	0	0	0	0	0
	1177	0	0	0	0	0	0	0	0	0	0	0	0	0	0	0	0	0	0	0	0
	1178	0	0	0	0	0	0	0	0	0	0	0	0	0	0	0	0	0	0	0	0
	1179	0	0	0	0	0	0	0	0	0	0	0	0	0	0	0	0	0	0	0	0
	1180	0	0	0	0	0	0	0	0	0	0	0	0	0	0	0	0	0	0	0	0
	1181	0	0	0	0	0	0	0	0	0	0	0	0	0	0	0	0	0	0	0	0
	1182	0	0	0	0	0	0	0	0	0	0	0	0	0	0	0	0	0	0	0	0
	1183	0	0	0	0	0	0	0	0	0	0	0	0	0	0	0	0	0	0	0	0
	1184	0	0	0	0	0	0	0	0	0	0	0	0	0	0	0	0	0	0	0	0
	1185	0	0	0	0	0	0	0	0	0	0	0	0	0	0	0	0	0	0	0	0
	1186	0	0	0	0	0	0	0	0	0	0	0	0	0	0	0	0	0	0	0	0
	1187	0	0	0	0	0	0	0	0	0	0	0	0	0	0	0	0	0	0	0	0
	1188	0	0	0	0	0	0	0	0	0	0	0	0	0	0	0	0	0	0	0	0
	1189	0	0	0	0	0	0	0	0	0	0	0	0	0	0	0	0	0	0	0	0
	1190	0	0	0	0	0	0	0	0	0	0	0	0	0	0	0	0	0	0	0	0
	1191	0	0	0	0	0	0	0	0	0	0	0	0	0	0	0	0	0	0	0	0
	1192	0	0	0	0	0	0	0	0	0	0	0	0	0	0	0	0	0	0	0	0
	1193	0	0	0	0	0	0	0	0	0	0	0	0	0	0	0	0	0	0	0	0
	1194	0	0	0	0	0	0	0	0	0	0	0	0	0	0	0	0	0	0	0	0
	1195	0	0	0	0	0	0	0	0	0	0	0	0	0	0	0	0	0	0	0	0
	1196	0	0	0	0	0	0	0	0	0	0	0	0	0	0	0	0	0	0	0	0
	1197	0	0	0	0	0	0	0	0	0	0	0	0	0	0	0	0	0	0	0	0
	1198	0	0	0	0	0	0	0	0	0	0	0	0	0	0	0	0	0	0	0	0
	1199	0	0	0	0	0	0	0	0	0	0	0	0	0	0	0	0	0	0	0	0
	1200	0	0	0	0	0	0	0	0	0	0	0	0	0	0	0	0	0	0	0	0
	1201	0	0	0	0	0	0	0	0	0	0	0	0	0	0	0	0	0	0	0	0
	1202	0	0	0	0	0	0	0	0	0	0	0	0	0	0	0	0	0	0	0	0
	1203	0	0	0	0	0	0	0	0	0	0	0	0	0	0	0	0	0	0	0	0
	1204	0	0	0	0	0	0	0	0	0	0	0	0	0	0	0	0	0	0	0	0
	1205	0	0	0	0	0	0	0	0	0	0	0	0	0	0	0	0	0	0	0	0
	1206	0	0	0	0	0	0	0	0	0	0	0	0	0	0	0	0	0	0	0	0
	1207	0	0	0	0	0	0	0	0	0	0	0	0	0	0	0	0	0	0	0	0
	1208	0	0	0	0	0	0	0	0	0	0	0	0	0	0	0	0	0	0	0	0
	1209	0	0	0	0	0	0	0	0	0	0	0	0	0	0	0	0	0	0	0	0
	1210	0	0	0	0	0	0	0	0	0	0	0	0	0	0	0	0	0	0	0	0
	1211	0	0	0	0	0	0	0	0	0	0	0	0	0	0	0	0	0	0	0	0
	1212	0	0	0	0	0	0	0	0	0	0	0	0	0	0	0	0	0	0	0	0
	1213	0	0	0	0	0	0	0	0	0	0	0	0	0	0	0	0	0	0	0	0										0	0	0	0	0	0	0	0	0	0	0	0	0	0	0	0	0	0	0
	1214	0	0	0	0	0	0	0	0	0	0	0	0	0	0	0	0	0	0	0	0										0	0	0	0	0	0	0	0	0	0	0	0	0	0	0	0	0	0	0
	1215	0	0	0	0	0	0	0	0	0	0	0	0	0	0	0	0	0	0	0	0										0	0	0	0	0	0	0	0	0	0	0	0	0	0	0	0	0	0	0
	1216	0	0	0	0	0	0	0	0	0	0	0	0	0	0	0	0	0	0	0	0										0	0	0	0	0	0	0	0	0	0	0	0	0	0	0	0	0	0	0
	1217	0	0	0	0	0	0	0	0	0	0	0	0	0	0	0	0	0	0	0	0										0	0	0	0	0	0	0	0	0	0	0	0	0	0	0	0	0	0	0
																															0	0	0	0	0	0	0	0	0	0	0	0	0	0	0	0	0	0	0
SUM	609	156	72	96	168	216	214	224	132	108	80	120	200	680	1560	2600	79.99	80.01	0	-40	-120									571915	1885	936	1190	2128	2752	2600.51	2757.99	1590	1314	880	1270	2050	6730	15310	25450	879.903	880.097	-100	-590
CN X SUM OF ELEM.		2028	936	1248	2184	2808	2782.01	2911.99	1716	1404	880	1320	2200	7480	17160	28600	879.89	880.11	0	-440	-1320
		7	8	9	10	11	12	13	14	15	16	17	18	19	20	21	22	23	24	25	26
	SC	1.07586	1	1.04874	1.02632	1.02035	1.06979	1.05584	1.07925	1.06849	1	1.03937	1.07317	1.11144	1.12084	1.12377	0.999986	1.00001	0	0.745763	0.840764
[truncated: 3 more columns]

## Sheet: 04
	OPTINALYSIS: SEQUENCE ANALYSIS THROUGH A LOOKING-GLASS
	CN = Central node; Kc = Kabirian coefficient of similarity; %Sim. = Percentage similarity; %Dsim. = Percentage dissimilarity																NUM. = Numeration; DEN. = Denumeration
				For Kc >1		For Kc <1
	RESULTS	CN	Kc	%Sim.	%Dsim.	%Sim.	%Dsim.										NUM	DEN		NUM	DEN
	Seq. 1U	11	0.885906	169.388	-69.3878	59.0361	40.9639										111.409	0.657718		-65.7718	-1.11409
	Seq. 1V	11	0.897905	158.869	-58.8687	62.9451	37.0549										110.21	0.693714		-69.3714	-1.1021
	Seq. 1W	11	0.901785	155.697	-55.6967	64.2274	35.7726										109.821	0.705355		-70.5355	-1.09821
	Seq. 1X	11	0.779517	360.501	-260.501	27.7391	72.2609										122.048	0.338551		-33.8551	-1.22048
	Seq. 1Y	11	0.779538	360.429	-260.429	27.7447	72.2553										122.046	0.338614		-33.8614	-1.22046
	Seq.	0	#DIV/0!	#DIV/0!	#DIV/0!	#DIV/0!	#DIV/0!										#DIV/0!	#DIV/0!		#DIV/0!	#DIV/0!
	Seq.	0	#DIV/0!	#DIV/0!	#DIV/0!	#DIV/0!	#DIV/0!										#DIV/0!	#DIV/0!		#DIV/0!	#DIV/0!
	Seq.	0	#DIV/0!	#DIV/0!	#DIV/0!	#DIV/0!	#DIV/0!										#DIV/0!	#DIV/0!		#DIV/0!	#DIV/0!
	Seq.	0	#DIV/0!	#DIV/0!	#DIV/0!	#DIV/0!	#DIV/0!										#DIV/0!	#DIV/0!		#DIV/0!	#DIV/0!
	Seq.	0	#DIV/0!	#DIV/0!	#DIV/0!	#DIV/0!	#DIV/0!										#DIV/0!	#DIV/0!		#DIV/0!	#DIV/0!
	Seq.	0	#DIV/0!	#DIV/0!	#DIV/0!	#DIV/0!	#DIV/0!										#DIV/0!	#DIV/0!		#DIV/0!	#DIV/0!
	Seq.	0	#DIV/0!	#DIV/0!	#DIV/0!	#DIV/0!	#DIV/0!										#DIV/0!	#DIV/0!		#DIV/0!	#DIV/0!
	Seq.	0	#DIV/0!	#DIV/0!	#DIV/0!	#DIV/0!	#DIV/0!										#DIV/0!	#DIV/0!		#DIV/0!	#DIV/0!
	Seq.	0	#DIV/0!	#DIV/0!	#DIV/0!	#DIV/0!	#DIV/0!										#DIV/0!	#DIV/0!		#DIV/0!	#DIV/0!
	Seq.	0	#DIV/0!	#DIV/0!	#DIV/0!	#DIV/0!	#DIV/0!										#DIV/0!	#DIV/0!		#DIV/0!	#DIV/0!
	Seq.	0	#DIV/0!	#DIV/0!	#DIV/0!	#DIV/0!	#DIV/0!										#DIV/0!	#DIV/0!		#DIV/0!	#DIV/0!
	Seq.	0	#DIV/0!	#DIV/0!	#DIV/0!	#DIV/0!	#DIV/0!										#DIV/0!	#DIV/0!		#DIV/0!	#DIV/0!
	Seq.	0	#DIV/0!	#DIV/0!	#DIV/0!	#DIV/0!	#DIV/0!										#DIV/0!	#DIV/0!		#DIV/0!	#DIV/0!
	Seq.	0	#DIV/0!	#DIV/0!	#DIV/0!	#DIV/0!	#DIV/0!										#DIV/0!	#DIV/0!		#DIV/0!	#DIV/0!
	Seq.	0	#DIV/0!	#DIV/0!	#DIV/0!	#DIV/0!	#DIV/0!										#DIV/0!	#DIV/0!		#DIV/0!	#DIV/0!
	SEQUENCES	INPUT SEQUENCE																												SEQUENCES	COMPUTATION AND CALCULATIONS
	QUANTITATIVE SCALE	Seq. 1U	Seq. 1V	Seq. 1W	Seq. 1X	Seq. 1Y	Seq.	Seq.	Seq.	Seq.	Seq.	Seq.	Seq.	Seq.	Seq.	Seq.	Seq.	Seq.	Seq.	Seq.	Seq.									QUANTITATIVE SCALE	Seq. 1U	Seq. 1V	Seq. 1W	Seq. 1X	Seq. 1Y	Seq.	Seq.	Seq.	Seq.	Seq.	Seq.	Seq.	Seq.	Seq.	Seq.	Seq.	Seq.	Seq.	Seq.
	1	4	4	4	4	4	0	0	0	0	0	0	0	0	0	0	0	0	0	0	0									1	4	4	4	4	4	0	0	0	0	0	0	0	0	0	0	0	0	0	0
	2	4	4	4	4	4	0	0	0	0	0	0	0	0	0	0	0	0	0	0	0									2	8	8	8	8	8	0	0	0	0	0	0	0	0	0	0	0	0	0	0
	3	4	4	4	4	4	0	0	0	0	0	0	0	0	0	0	0	0	0	0	0									3	12	12	12	12	12	0	0	0	0	0	0	0	0	0	0	0	0	0	0
	4	4	4	4	4	4	0	0	0	0	0	0	0	0	0	0	0	0	0	0	0									4	16	16	16	16	16	0	0	0	0	0	0	0	0	0	0	0	0	0	0
	5	4	4	4	4	4	0	0	0	0	0	0	0	0	0	0	0	0	0	0	0									5	20	20	20	20	20	0	0	0	0	0	0	0	0	0	0	0	0	0	0
	6	-64	-152	-256	-3.999	-4.001	0	0	0	0	0	0	0	0	0	0	0	0	0	0	0									6	-384	-912	-1536	-23.994	-24.006	0	0	0	0	0	0	0	0	0	0	0	0	0	0
	7	-64	-152	-256	-3.999	-4.001	0	0	0	0	0	0	0	0	0	0	0	0	0	0	0									7	-448	-1064	-1792	-27.993	-28.007	0	0	0	0	0	0	0	0	0	0	0	0	0	0
	8	-64	-152	-256	-3.999	-4.001	0	0	0	0	0	0	0	0	0	0	0	0	0	0	0									8	-512	-1216	-2048	-31.992	-32.008	0	0	0	0	0	0	0	0	0	0	0	0	0	0
	9	-64	-152	-256	-3.999	-4.001	0	0	0	0	0	0	0	0	0	0	0	0	0	0	0									9	-576	-1368	-2304	-35.991	-36.009	0	0	0	0	0	0	0	0	0	0	0	0	0	0
	10	-64	-152	-256	-3.999	-4.001	0	0	0	0	0	0	0	0	0	0	0	0	0	0	0									10	-640	-1520	-2560	-39.99	-40.01	0	0	0	0	0	0	0	0	0	0	0	0	0	0
	11	0	0	0	0	0	0	0	0	0	0	0	0	0	0	0	0	0	0	0	0									11	0	0	0	0	0	0	0	0	0	0	0	0	0	0	0	0	0	0	0
	12	-30	-30	-30	-30	-30	0	0	0	0	0	0	0	0	0	0	0	0	0	0	0									12	-360	-360	-360	-360	-360	0	0	0	0	0	0	0	0	0	0	0	0	0	0
	13	-30	-30	-30	-30	-30	0	0	0	0	0	0	0	0	0	0	0	0	0	0	0									13	-390	-390	-390	-390	-390	0	0	0	0	0	0	0	0	0	0	0	0	0	0
	14	-30	-30	-30	-30	-30	0	0	0	0	0	0	0	0	0	0	0	0	0	0	0									14	-420	-420	-420	-420	-420	0	0	0	0	0	0	0	0	0	0	0	0	0	0
	15	-30	-74	-126	0.0005	-0.0005	0	0	0	0	0	0	0	0	0	0	0	0	0	0	0									15	-450	-1110	-1890	0.0075	-0.0075	0	0	0	0	0	0	0	0	0	0	0	0	0	0
	16	-30	-74	-126	0.0005	-0.0005	0	0	0	0	0	0	0	0	0	0	0	0	0	0	0									16	-480	-1184	-2016	0.008	-0.008	0	0	0	0	0	0	0	0	0	0	0	0	0	0
	17	-30	-74	-126	0.0005	-0.0005	0	0	0	0	0	0	0	0	0	0	0	0	0	0	0									17	-510	-1258	-2142	0.0085	-0.0085	0	0	0	0	0	0	0	0	0	0	0	0	0	0
	18	-30	-74	-126	0.0005	-0.0005	0	0	0	0	0	0	0	0	0	0	0	0	0	0	0									18	-540	-1332	-2268	0.009	-0.009	0	0	0	0	0	0	0	0	0	0	0	0	0	0
	19	-30	-74	-126	0.0005	-0.0005	0	0	0	0	0	0	0	0	0	0	0	0	0	0	0									19	-570	-1406	-2394	0.0095	-0.0095	0	0	0	0	0	0	0	0	0	0	0	0	0	0
	20	-30	-74	-126	0.0005	-0.0005	0	0	0	0	0	0	0	0	0	0	0	0	0	0	0									20	-600	-1480	-2520	0.01	-0.01	0	0	0	0	0	0	0	0	0	0	0	0	0	0
	21	-30	-74	-126	0.0005	-0.0005	0	0	0	0	0	0	0	0	0	0	0	0	0	0	0									21	-630	-1554	-2646	0.0105	-0.0105	0	0	0	0	0	0	0	0	0	0	0	0	0	0
	22	0	0	0	0	0	0	0	0	0	0	0	0	0	0	0	0	0	0	0	0									22	0	0	0	0	0	0	0	0	0	0	0	0	0	0	0	0	0	0	0
	23	0	0	0	0	0	0	0	0	0	0	0	0	0	0	0	0	0	0	0	0									23	0	0	0	0	0	0	0	0	0	0	0	0	0	0	0	0	0	0	0
	24	0	0	0	0	0	0	0	0	0	0	0	0	0	0	0	0	0	0	0	0									24	0	0	0	0	0	0	0	0	0	0	0	0	0	0	0	0	0	0	0
	25	0	0	0	0	0	0	0	0	0	0	0	0	0	0	0	0	0	0	0	0									25	0	0	0	0	0	0	0	0	0	0	0	0	0	0	0	0	0	0	0
	26	0	0	0	0	0	0	0	0	0	0	0	0	0	0	0	0	0	0	0	0									26	0	0	0	0	0	0	0	0	0	0	0	0	0	0	0	0	0	0	0
	27	0	0	0	0	0	0	0	0	0	0	0	0	0	0	0	0	0	0	0	0									27	0	0	0	0	0	0	0	0	0	0	0	0	0	0	0	0	0	0	0
	28	0	0	0	0	0	0	0	0	0	0	0	0	0	0	0	0	0	0	0	0									28	0	0	0	0	0	0	0	0	0	0	0	0	0	0	0	0	0	0	0
	29	0	0	0	0	0	0	0	0	0	0	0	0	0	0	0	0	0	0	0	0									29	0	0	0	0	0	0	0	0	0	0	0	0	0	0	0	0	0	0	0
	30	0	0	0	0	0	0	0	0	0	0	0	0	0	0	0	0	0	0	0	0									30	0	0	0	0	0	0	0	0	0	0	0	0	0	0	0	0	0	0	0
	31	0	0	0	0	0	0	0	0	0	0	0	0	0	0	0	0	0	0	0	0									31	0	0	0	0	0	0	0	0	0	0	0	0	0	0	0	0	0	0	0
	32	0	0	0	0	0	0	0	0	0	0	0	0	0	0	0	0	0	0	0	0									32	0	0	0	0	0	0	0	0	0	0	0	0	0	0	0	0	0	0	0
	33	0	0	0	0	0	0	0	0	0	0	0	0	0	0	0	0	0	0	0	0									33	0	0	0	0	0	0	0	0	0	0	0	0	0	0	0	0	0	0	0
	34	0	0	0	0	0	0	0	0	0	0	0	0	0	0	0	0	0	0	0	0									34	0	0	0	0	0	0	0	0	0	0	0	0	0	0	0	0	0	0	0
	35	0	0	0	0	0	0	0	0	0	0	0	0	0	0	0	0	0	0	0	0									35	0	0	0	0	0	0	0	0	0	0	0	0	0	0	0	0	0	0	0
	36	0	0	0	0	0	0	0	0	0	0	0	0	0	0	0	0	0	0	0	0									36	0	0	0	0	0	0	0	0	0	0	0	0	0	0	0	0	0	0	0
	37	0	0	0	0	0	0	0	0	0	0	0	0	0	0	0	0	0	0	0	0									37	0	0	0	0	0	0	0	0	0	0	0	0	0	0	0	0	0	0	0
	38	0	0	0	0	0	0	0	0	0	0	0	0	0	0	0	0	0	0	0	0									38	0	0	0	0	0	0	0	0	0	0	0	0	0	0	0	0	0	0	0
	39	0	0	0	0	0	0	0	0	0	0	0	0	0	0	0	0	0	0	0	0									39	0	0	0	0	0	0	0	0	0	0	0	0	0	0	0	0	0	0	0
	40	0	0	0	0	0	0	0	0	0	0	0	0	0	0	0	0	0	0	0	0									40	0	0	0	0	0	0	0	0	0	0	0	0	0	0	0	0	0	0	0
	41	0	0	0	0	0	0	0	0	0	0	0	0	0	0	0	0	0	0	0	0									41	0	0	0	0	0	0	0	0	0	0	0	0	0	0	0	0	0	0	0
	42	0	0	0	0	0	0	0	0	0	0	0	0	0	0	0	0	0	0	0	0									42	0	0	0	0	0	0	0	0	0	0	0	0	0	0	0	0	0	0	0
	43	0	0	0	0	0	0	0	0	0	0	0	0	0	0	0	0	0	0	0	0									43	0	0	0	0	0	0	0	0	0	0	0	0	0	0	0	0	0	0	0
	44	0	0	0	0	0	0	0	0	0	0	0	0	0	0	0	0	0	0	0	0									44	0	0	0	0	0	0	0	0	0	0	0	0	0	0	0	0	0	0	0
	45	0	0	0	0	0	0	0	0	0	0	0	0	0	0	0	0	0	0	0	0									45	0	0	0	0	0	0	0	0	0	0	0	0	0	0	0	0	0	0	0
	46	0	0	0	0	0	0	0	0	0	0	0	0	0	0	0	0	0	0	0	0									46	0	0	0	0	0	0	0	0	0	0	0	0	0	0	0	0	0	0	0
	47	0	0	0	0	0	0	0	0	0	0	0	0	0	0	0	0	0	0	0	0									47	0	0	0	0	0	0	0	0	0	0	0	0	0	0	0	0	0	0	0
	48	0	0	0	0	0	0	0	0	0	0	0	0	0	0	0	0	0	0	0	0									48	0	0	0	0	0	0	0	0	0	0	0	0	0	0	0	0	0	0	0
	49	0	0	0	0	0	0	0	0	0	0	0	0	0	0	0	0	0	0	0	0									49	0	0	0	0	0	0	0	0	0	0	0	0	0	0	0	0	0	0	0
	50	0	0	0	0	0	0	0	0	0	0	0	0	0	0	0	0	0	0	0	0									50	0	0	0	0	0	0	0	0	0	0	0	0	0	0	0	0	0	0	0
	51	0	0	0	0	0	0	0	0	0	0	0	0	0	0	0	0	0	0	0	0									51	0	0	0	0	0	0	0	0	0	0	0	0	0	0	0	0	0	0	0
	52	0	0	0	0	0	0	0	0	0	0	0	0	0	0	0	0	0	0	0	0									52	0	0	0	0	0	0	0	0	0	0	0	0	0	0	0	0	0	0	0
	53	0	0	0	0	0	0	0	0	0	0	0	0	0	0	0	0	0	0	0	0									53	0	0	0	0	0	0	0	0	0	0	0	0	0	0	0	0	0	0	0
	54	0	0	0	0	0	0	0	0	0	0	0	0	0	0	0	0	0	0	0	0									54	0	0	0	0	0	0	0	0	0	0	0	0	0	0	0	0	0	0	0
	55	0	0	0	0	0	0	0	0	0	0	0	0	0	0	0	0	0	0	0	0									55	0	0	0	0	0	0	0	0	0	0	0	0	0	0	0	0	0	0	0
	56	0	0	0	0	0	0	0	0	0	0	0	0	0	0	0	0	0	0	0	0									56	0	0	0	0	0	0	0	0	0	0	0	0	0	0	0	0	0	0	0
	57	0	0	0	0	0	0	0	0	0	0	0	0	0	0	0	0	0	0	0	0									57	0	0	0	0	0	0	0	0	0	0	0	0	0	0	0	0	0	0	0
	58	0	0	0	0	0	0	0	0	0	0	0	0	0	0	0	0	0	0	0	0									58	0	0	0	0	0	0	0	0	0	0	0	0	0	0	0	0	0	0	0
	59	0	0	0	0	0	0	0	0	0	0	0	0	0	0	0	0	0	0	0	0									59	0	0	0	0	0	0	0	0	0	0	0	0	0	0	0	0	0	0	0
	60	0	0	0	0	0	0	0	0	0	0	0	0	0	0	0	0	0	0	0	0									60	0	0	0	0	0	0	0	0	0	0	0	0	0	0	0	0	0	0	0
	61	0	0	0	0	0	0	0	0	0	0	0	0	0	0	0	0	0	0	0	0									61	0	0	0	0	0	0	0	0	0	0	0	0	0	0	0	0	0	0	0
	62	0	0	0	0	0	0	0	0	0	0	0	0	0	0	0	0	0	0	0	0									62	0	0	0	0	0	0	0	0	0	0	0	0	0	0	0	0	0	0	0
	63	0	0	0	0	0	0	0	0	0	0	0	0	0	0	0	0	0	0	0	0									63	0	0	0	0	0	0	0	0	0	0	0	0	0	0	0	0	0	0	0
	64	0	0	0	0	0	0	0	0	0	0	0	0	0	0	0	0	0	0	0	0									64	0	0	0	0	0	0	0	0	0	0	0	0	0	0	0	0	0	0	0
	65	0	0	0	0	0	0	0	0	0	0	0	0	0	0	0	0	0	0	0	0									65	0	0	0	0	0	0	0	0	0	0	0	0	0	0	0	0	0	0	0
	66	0	0	0	0	0	0	0	0	0	0	0	0	0	0	0	0	0	0	0	0									66	0	0	0	0	0	0	0	0	0	0	0	0	0	0	0	0	0	0	0
	67	0	0	0	0	0	0	0	0	0	0	0	0	0	0	0	0	0	0	0	0									67	0	0	0	0	0	0	0	0	0	0	0	0	0	0	0	0	0	0	0
	68	0	0	0	0	0	0	0	0	0	0	0	0	0	0	0	0	0	0	0	0									68	0	0	0	0	0	0	0	0	0	0	0	0	0	0	0	0	0	0	0
	69	0	0	0	0	0	0	0	0	0	0	0	0	0	0	0	0	0	0	0	0									69	0	0	0	0	0	0	0	0	0	0	0	0	0	0	0	0	0	0	0
	70	0	0	0	0	0	0	0	0	0	0	0	0	0	0	0	0	0	0	0	0									70	0	0	0	0	0	0	0	0	0	0	0	0	0	0	0	0	0	0	0
	71	0	0	0	0	0	0	0	0	0	0	0	0	0	0	0	0	0	0	0	0									71	0	0	0	0	0	0	0	0	0	0	0	0	0	0	0	0	0	0	0
	72	0	0	0	0	0	0	0	0	0	0	0	0	0	0	0	0	0	0	0	0									72	0	0	0	0	0	0	0	0	0	0	0	0	0	0	0	0	0	0	0
	73	0	0	0	0	0	0	0	0	0	0	0	0	0	0	0	0	0	0	0	0									73	0	0	0	0	0	0	0	0	0	0	0	0	0	0	0	0	0	0	0
	74	0	0	0	0	0	0	0	0	0	0	0	0	0	0	0	0	0	0	0	0									74	0	0	0	0	0	0	0	0	0	0	0	0	0	0	0	0	0	0	0
	75	0	0	0	0	0	0	0	0	0	0	0	0	0	0	0	0	0	0	0	0									75	0	0	0	0	0	0	0	0	0	0	0	0	0	0	0	0	0	0	0
	76	0	0	0	0	0	0	0	0	0	0	0	0	0	0	0	0	0	0	0	0									76	0	0	0	0	0	0	0	0	0	0	0	0	0	0	0	0	0	0	0
	77	0	0	0	0	0	0	0	0	0	0	0	0	0	0	0	0	0	0	0	0									77	0	0	0	0	0	0	0	0	0	0	0	0	0	0	0	0	0	0	0
	78	0	0	0	0	0	0	0	0	0	0	0	0	0	0	0	0	0	0	0	0									78	0	0	0	0	0	0	0	0	0	0	0	0	0	0	0	0	0	0	0
	79	0	0	0	0	0	0	0	0	0	0	0	0	0	0	0	0	0	0	0	0									79	0	0	0	0	0	0	0	0	0	0	0	0	0	0	0	0	0	0	0
	80	0	0	0	0	0	0	0	0	0	0	0	0	0	0	0	0	0	0	0	0									80	0	0	0	0	0	0	0	0	0	0	0	0	0	0	0	0	0	0	0
	81	0	0	0	0	0	0	0	0	0	0	0	0	0	0	0	0	0	0	0	0									81	0	0	0	0	0	0	0	0	0	0	0	0	0	0	0	0	0	0	0
	82	0	0	0	0	0	0	0	0	0	0	0	0	0	0	0	0	0	0	0	0									82	0	0	0	0	0	0	0	0	0	0	0	0	0	0	0	0	0	0	0
	83	0	0	0	0	0	0	0	0	0	0	0	0	0	0	0	0	0	0	0	0									83	0	0	0	0	0	0	0	0	0	0	0	0	0	0	0	0	0	0	0
	84	0	0	0	0	0	0	0	0	0	0	0	0	0	0	0	0	0	0	0	0									84	0	0	0	0	0	0	0	0	0	0	0	0	0	0	0	0	0	0	0
	85	0	0	0	0	0	0	0	0	0	0	0	0	0	0	0	0	0	0	0	0									85	0	0	0	0	0	0	0	0	0	0	0	0	0	0	0	0	0	0	0
	86	0	0	0	0	0	0	0	0	0	0	0	0	0	0	0	0	0	0	0	0									86	0	0	0	0	0	0	0	0	0	0	0	0	0	0	0	0	0	0	0
	87	0	0	0	0	0	0	0	0	0	0	0	0	0	0	0	0	0	0	0	0									87	0	0	0	0	0	0	0	0	0	0	0	0	0	0	0	0	0	0	0
	88	0	0	0	0	0	0	0	0	0	0	0	0	0	0	0	0	0	0	0	0									88	0	0	0	0	0	0	0	0	0	0	0	0	0	0	0	0	0	0	0
	89	0	0	0	0	0	0	0	0	0	0	0	0	0	0	0	0	0	0	0	0									89	0	0	0	0	0	0	0	0	0	0	0	0	0	0	0	0	0	0	0
	90	0	0	0	0	0	0	0	0	0	0	0	0	0	0	0	0	0	0	0	0									90	0	0	0	0	0	0	0	0	0	0	0	0	0	0	0	0	0	0	0
	91	0	0	0	0	0	0	0	0	0	0	0	0	0	0	0	0	0	0	0	0									91	0	0	0	0	0	0	0	0	0	0	0	0	0	0	0	0	0	0	0
	92	0	0	0	0	0	0	0	0	0	0	0	0	0	0	0	0	0	0	0	0									92	0	0	0	0	0	0	0	0	0	0	0	0	0	0	0	0	0	0	0
	93	0	0	0	0	0	0	0	0	0	0	0	0	0	0	0	0	0	0	0	0									93	0	0	0	0	0	0	0	0	0	0	0	0	0	0	0	0	0	0	0
	94	0	0	0	0	0	0	0	0	0	0	0	0	0	0	0	0	0	0	0	0									94	0	0	0	0	0	0	0	0	0	0	0	0	0	0	0	0	0	0	0
	95	0	0	0	0	0	0	0	0	0	0	0	0	0	0	0	0	0	0	0	0									95	0	0	0	0	0	0	0	0	0	0	0	0	0	0	0	0	0	0	0
	96	0	0	0	0	0	0	0	0	0	0	0	0	0	0	0	0	0	0	0	0									96	0	0	0	0	0	0	0	0	0	0	0	0	0	0	0	0	0	0	0
	97	0	0	0	0	0	0	0	0	0	0	0	0	0	0	0	0	0	0	0	0									97	0	0	0	0	0	0	0	0	0	0	0	0	0	0	0	0	0	0	0
	98	0	0	0	0	0	0	0	0	0	0	0	0	0	0	0	0	0	0	0	0									98	0	0	0	0	0	0	0	0	0	0	0	0	0	0	0	0	0	0	0
	99	0	0	0	0	0	0	0	0	0	0	0	0	0	0	0	0	0	0	0	0									99	0	0	0	0	0	0	0	0	0	0	0	0	0	0	0	0	0	0	0
	100	0	0	0	0	0	0	0	0	0	0	0	0	0	0	0	0	0	0	0	0									100	0	0	0	0	0	0	0	0	0	0	0	0	0	0	0	0	0	0	0
	101	0	0	0	0	0	0	0	0	0	0	0	0	0	0	0	0	0	0	0	0									101	0	0	0	0	0	0	0	0	0	0	0	0	0	0	0	0	0	0	0
	102	0	0	0	0	0	0	0	0	0	0	0	0	0	0	0	0	0	0	0	0									102	0	0	0	0	0	0	0	0	0	0	0	0	0	0	0	0	0	0	0
	103	0	0	0	0	0	0	0	0	0	0	0	0	0	0	0	0	0	0	0	0									103	0	0	0	0	0	0	0	0	0	0	0	0	0	0	0	0	0	0	0
	104	0	0	0	0	0	0	0	0	0	0	0	0	0	0	0	0	0	0	0	0									104	0	0	0	0	0	0	0	0	0	0	0	0	0	0	0	0	0	0	0
	105	0	0	0	0	0	0	0	0	0	0	0	0	0	0	0	0	0	0	0	0									105	0	0	0	0	0	0	0	0	0	0	0	0	0	0	0	0	0	0	0
	106	0	0	0	0	0	0	0	0	0	0	0	0	0	0	0	0	0	0	0	0									106	0	0	0	0	0	0	0	0	0	0	0	0	0	0	0	0	0	0	0
	107	0	0	0	0	0	0	0	0	0	0	0	0	0	0	0	0	0	0	0	0									107	0	0	0	0	0	0	0	0	0	0	0	0	0	0	0	0	0	0	0
	108	0	0	0	0	0	0	0	0	0	0	0	0	0	0	0	0	0	0	0	0									108	0	0	0	0	0	0	0	0	0	0	0	0	0	0	0	0	0	0	0
	109	0	0	0	0	0	0	0	0	0	0	0	0	0	0	0	0	0	0	0	0									109	0	0	0	0	0	0	0	0	0	0	0	0	0	0	0	0	0	0	0
	110	0	0	0	0	0	0	0	0	0	0	0	0	0	0	0	0	0	0	0	0									110	0	0	0	0	0	0	0	0	0	0	0	0	0	0	0	0	0	0	0
	111	0	0	0	0	0	0	0	0	0	0	0	0	0	0	0	0	0	0	0	0									111	0	0	0	0	0	0	0	0	0	0	0	0	0	0	0	0	0	0	0
	112	0	0	0	0	0	0	0	0	0	0	0	0	0	0	0	0	0	0	0	0									112	0	0	0	0	0	0	0	0	0	0	0	0	0	0	0	0	0	0	0
	113	0	0	0	0	0	0	0	0	0	0	0	0	0	0	0	0	0	0	0	0									113	0	0	0	0	0	0	0	0	0	0	0	0	0	0	0	0	0	0	0
	114	0	0	0	0	0	0	0	0	0	0	0	0	0	0	0	0	0	0	0	0									114	0	0	0	0	0	0	0	0	0	0	0	0	0	0	0	0	0	0	0
	115	0	0	0	0	0	0	0	0	0	0	0	0	0	0	0	0	0	0	0	0									115	0	0	0	0	0	0	0	0	0	0	0	0	0	0	0	0	0	0	0
	116	0	0	0	0	0	0	0	0	0	0	0	0	0	0	0	0	0	0	0	0									116	0	0	0	0	0	0	0	0	0	0	0	0	0	0	0	0	0	0	0
	117	0	0	0	0	0	0	0	0	0	0	0	0	0	0	0	0	0	0	0	0									117	0	0	0	0	0	0	0	0	0	0	0	0	0	0	0	0	0	0	0
	118	0	0	0	0	0	0	0	0	0	0	0	0	0	0	0	0	0	0	0	0									118	0	0	0	0	0	0	0	0	0	0	0	0	0	0	0	0	0	0	0
	119	0	0	0	0	0	0	0	0	0	0	0	0	0	0	0	0	0	0	0	0									119	0	0	0	0	0	0	0	0	0	0	0	0	0	0	0	0	0	0	0
	120	0	0	0	0	0	0	0	0	0	0	0	0	0	0	0	0	0	0	0	0									120	0	0	0	0	0	0	0	0	0	0	0	0	0	0	0	0	0	0	0
	121	0	0	0	0	0	0	0	0	0	0	0	0	0	0	0	0	0	0	0	0									121	0	0	0	0	0	0	0	0	0	0	0	0	0	0	0	0	0	0	0
	122	0	0	0	0	0	0	0	0	0	0	0	0	0	0	0	0	0	0	0	0									122	0	0	0	0	0	0	0	0	0	0	0	0	0	0	0	0	0	0	0
	123	0	0	0	0	0	0	0	0	0	0	0	0	0	0	0	0	0	0	0	0									123	0	0	0	0	0	0	0	0	0	0	0	0	0	0	0	0	0	0	0
	124	0	0	0	0	0	0	0	0	0	0	0	0	0	0	0	0	0	0	0	0									124	0	0	0	0	0	0	0	0	0	0	0	0	0	0	0	0	0	0	0
	125	0	0	0	0	0	0	0	0	0	0	0	0	0	0	0	0	0	0	0	0									125	0	0	0	0	0	0	0	0	0	0	0	0	0	0	0	0	0	0	0
	126	0	0	0	0	0	0	0	0	0	0	0	0	0	0	0	0	0	0	0	0									126	0	0	0	0	0	0	0	0	0	0	0	0	0	0	0	0	0	0	0
	127	0	0	0	0	0	0	0	0	0	0	0	0	0	0	0	0	0	0	0	0									127	0	0	0	0	0	0	0	0	0	0	0	0	0	0	0	0	0	0	0
	128	0	0	0	0	0	0	0	0	0	0	0	0	0	0	0	0	0	0	0	0									128	0	0	0	0	0	0	0	0	0	0	0	0	0	0	0	0	0	0	0
	129	0	0	0	0	0	0	0	0	0	0	0	0	0	0	0	0	0	0	0	0									129	0	0	0	0	0	0	0	0	0	0	0	0	0	0	0	0	0	0	0
	130	0	0	0	0	0	0	0	0	0	0	0	0	0	0	0	0	0	0	0	0									130	0	0	0	0	0	0	0	0	0	0	0	0	0	0	0	0	0	0	0
	131	0	0	0	0	0	0	0	0	0	0	0	0	0	0	0	0	0	0	0	0									131	0	0	0	0	0	0	0	0	0	0	0	0	0	0	0	0	0	0	0
	132	0	0	0	0	0	0	0	0	0	0	0	0	0	0	0	0	0	0	0	0									132	0	0	0	0	0	0	0	0	0	0	0	0	0	0	0	0	0	0	0
	133	0	0	0	0	0	0	0	0	0	0	0	0	0	0	0	0	0	0	0	0									133	0	0	0	0	0	0	0	0	0	0	0	0	0	0	0	0	0	0	0
	134	0	0	0	0	0	0	0	0	0	0	0	0	0	0	0	0	0	0	0	0									134	0	0	0	0	0	0	0	0	0	0	0	0	0	0	0	0	0	0	0
	135	0	0	0	0	0	0	0	0	0	0	0	0	0	0	0	0	0	0	0	0									135	0	0	0	0	0	0	0	0	0	0	0	0	0	0	0	0	0	0	0
	136	0	0	0	0	0	0	0	0	0	0	0	0	0	0	0	0	0	0	0	0									136	0	0	0	0	0	0	0	0	0	0	0	0	0	0	0	0	0	0	0
	137	0	0	0	0	0	0	0	0	0	0	0	0	0	0	0	0	0	0	0	0									137	0	0	0	0	0	0	0	0	0	0	0	0	0	0	0	0	0	0	0
	138	0	0	0	0	0	0	0	0	0	0	0	0	0	0	0	0	0	0	0	0									138	0	0	0	0	0	0	0	0	0	0	0	0	0	0	0	0	0	0	0
	139	0	0	0	0	0	0	0	0	0	0	0	0	0	0	0	0	0	0	0	0									139	0	0	0	0	0	0	0	0	0	0	0	0	0	0	0	0	0	0	0
	140	0	0	0	0	0	0	0	0	0	0	0	0	0	0	0	0	0	0	0	0									140	0	0	0	0	0	0	0	0	0	0	0	0	0	0	0	0	0	0	0
	141	0	0	0	0	0	0	0	0	0	0	0	0	0	0	0	0	0	0	0	0									141	0	0	0	0	0	0	0	0	0	0	0	0	0	0	0	0	0	0	0
	142	0	0	0	0	0	0	0	0	0	0	0	0	0	0	0	0	0	0	0	0									142	0	0	0	0	0	0	0	0	0	0	0	0	0	0	0	0	0	0	0
	143	0	0	0	0	0	0	0	0	0	0	0	0	0	0	0	0	0	0	0	0									143	0	0	0	0	0	0	0	0	0	0	0	0	0	0	0	0	0	0	0
	144	0	0	0	0	0	0	0	0	0	0	0	0	0	0	0	0	0	0	0	0									144	0	0	0	0	0	0	0	0	0	0	0	0	0	0	0	0	0	0	0
	145	0	0	0	0	0	0	0	0	0	0	0	0	0	0	0	0	0	0	0	0									145	0	0	0	0	0	0	0	0	0	0	0	0	0	0	0	0	0	0	0
	146	0	0	0	0	0	0	0	0	0	0	0	0	0	0	0	0	0	0	0	0									146	0	0	0	0	0	0	0	0	0	0	0	0	0	0	0	0	0	0	0
	147	0	0	0	0	0	0	0	0	0	0	0	0	0	0	0	0	0	0	0	0									147	0	0	0	0	0	0	0	0	0	0	0	0	0	0	0	0	0	0	0
	148	0	0	0	0	0	0	0	0	0	0	0	0	0	0	0	0	0	0	0	0									148	0	0	0	0	0	0	0	0	0	0	0	0	0	0	0	0	0	0	0
	149	0	0	0	0	0	0	0	0	0	0	0	0	0	0	0	0	0	0	0	0									149	0	0	0	0	0	0	0	0	0	0	0	0	0	0	0	0	0	0	0
	150	0	0	0	0	0	0	0	0	0	0	0	0	0	0	0	0	0	0	0	0									150	0	0	0	0	0	0	0	0	0	0	0	0	0	0	0	0	0	0	0
	151	0	0	0	0	0	0	0	0	0	0	0	0	0	0	0	0	0	0	0	0									151	0	0	0	0	0	0	0	0	0	0	0	0	0	0	0	0	0	0	0
	152	0	0	0	0	0	0	0	0	0	0	0	0	0	0	0	0	0	0	0	0									152	0	0	0	0	0	0	0	0	0	0	0	0	0	0	0	0	0	0	0
	153	0	0	0	0	0	0	0	0	0	0	0	0	0	0	0	0	0	0	0	0									153	0	0	0	0	0	0	0	0	0	0	0	0	0	0	0	0	0	0	0
	154	0	0	0	0	0	0	0	0	0	0	0	0	0	0	0	0	0	0	0	0									154	0	0	0	0	0	0	0	0	0	0	0	0	0	0	0	0	0	0	0
	155	0	0	0	0	0	0	0	0	0	0	0	0	0	0	0	0	0	0	0	0									155	0	0	0	0	0	0	0	0	0	0	0	0	0	0	0	0	0	0	0
	156	0	0	0	0	0	0	0	0	0	0	0	0	0	0	0	0	0	0	0	0									156	0	0	0	0	0	0	0	0	0	0	0	0	0	0	0	0	0	0	0
	157	0	0	0	0	0	0	0	0	0	0	0	0	0	0	0	0	0	0	0	0									157	0	0	0	0	0	0	0	0	0	0	0	0	0	0	0	0	0	0	0
	158	0	0	0	0	0	0	0	0	0	0	0	0	0	0	0	0	0	0	0	0									158	0	0	0	0	0	0	0	0	0	0	0	0	0	0	0	0	0	0	0
	159	0	0	0	0	0	0	0	0	0	0	0	0	0	0	0	0	0	0	0	0									159	0	0	0	0	0	0	0	0	0	0	0	0	0	0	0	0	0	0	0
	160	0	0	0	0	0	0	0	0	0	0	0	0	0	0	0	0	0	0	0	0									160	0	0	0	0	0	0	0	0	0	0	0	0	0	0	0	0	0	0	0
	161	0	0	0	0	0	0	0	0	0	0	0	0	0	0	0	0	0	0	0	0									161	0	0	0	0	0	0	0	0	0	0	0	0	0	0	0	0	0	0	0
	162	0	0	0	0	0	0	0	0	0	0	0	0	0	0	0	0	0	0	0	0									162	0	0	0	0	0	0	0	0	0	0	0	0	0	0	0	0	0	0	0
	163	0	0	0	0	0	0	0	0	0	0	0	0	0	0	0	0	0	0	0	0									163	0	0	0	0	0	0	0	0	0	0	0	0	0	0	0	0	0	0	0
	164	0	0	0	0	0	0	0	0	0	0	0	0	0	0	0	0	0	0	0	0									164	0	0	0	0	0	0	0	0	0	0	0	0	0	0	0	0	0	0	0
	165	0	0	0	0	0	0	0	0	0	0	0	0	0	0	0	0	0	0	0	0									165	0	0	0	0	0	0	0	0	0	0	0	0	0	0	0	0	0	0	0
	166	0	0	0	0	0	0	0	0	0	0	0	0	0	0	0	0	0	0	0	0									166	0	0	0	0	0	0	0	0	0	0	0	0	0	0	0	0	0	0	0
	167	0	0	0	0	0	0	0	0	0	0	0	0	0	0	0	0	0	0	0	0									167	0	0	0	0	0	0	0	0	0	0	0	0	0	0	0	0	0	0	0
	168	0	0	0	0	0	0	0	0	0	0	0	0	0	0	0	0	0	0	0	0									168	0	0	0	0	0	0	0	0	0	0	0	0	0	0	0	0	0	0	0
	169	0	0	0	0	0	0	0	0	0	0	0	0	0	0	0	0	0	0	0	0									169	0	0	0	0	0	0	0	0	0	0	0	0	0	0	0	0	0	0	0
	170	0	0	0	0	0	0	0	0	0	0	0	0	0	0	0	0	0	0	0	0									170	0	0	0	0	0	0	0	0	0	0	0	0	0	0	0	0	0	0	0
	171	0	0	0	0	0	0	0	0	0	0	0	0	0	0	0	0	0	0	0	0									171	0	0	0	0	0	0	0	0	0	0	0	0	0	0	0	0	0	0	0
	172	0	0	0	0	0	0	0	0	0	0	0	0	0	0	0	0	0	0	0	0									172	0	0	0	0	0	0	0	0	0	0	0	0	0	0	0	0	0	0	0
	173	0	0	0	0	0	0	0	0	0	0	0	0	0	0	0	0	0	0	0	0									173	0	0	0	0	0	0	0	0	0	0	0	0	0	0	0	0	0	0	0
	174	0	0	0	0	0	0	0	0	0	0	0	0	0	0	0	0	0	0	0	0									174	0	0	0	0	0	0	0	0	0	0	0	0	0	0	0	0	0	0	0
	175	0	0	0	0	0	0	0	0	0	0	0	0	0	0	0	0	0	0	0	0									175	0	0	0	0	0	0	0	0	0	0	0	0	0	0	0	0	0	0	0
	176	0	0	0	0	0	0	0	0	0	0	0	0	0	0	0	0	0	0	0	0									176	0	0	0	0	0	0	0	0	0	0	0	0	0	0	0	0	0	0	0
	177	0	0	0	0	0	0	0	0	0	0	0	0	0	0	0	0	0	0	0	0									177	0	0	0	0	0	0	0	0	0	0	0	0	0	0	0	0	0	0	0
	178	0	0	0	0	0	0	0	0	0	0	0	0	0	0	0	0	0	0	0	0									178	0	0	0	0	0	0	0	0	0	0	0	0	0	0	0	0	0	0	0
	179	0	0	0	0	0	0	0	0	0	0	0	0	0	0	0	0	0	0	0	0									179	0	0	0	0	0	0	0	0	0	0	0	0	0	0	0	0	0	0	0
	180	0	0	0	0	0	0	0	0	0	0	0	0	0	0	0	0	0	0	0	0									180	0	0	0	0	0	0	0	0	0	0	0	0	0	0	0	0	0	0	0
	181	0	0	0	0	0	0	0	0	0	0	0	0	0	0	0	0	0	0	0	0									181	0	0	0	0	0	0	0	0	0	0	0	0	0	0	0	0	0	0	0
	182	0	0	0	0	0	0	0	0	0	0	0	0	0	0	0	0	0	0	0	0									182	0	0	0	0	0	0	0	0	0	0	0	0	0	0	0	0	0	0	0
	183	0	0	0	0	0	0	0	0	0	0	0	0	0	0	0	0	0	0	0	0									183	0	0	0	0	0	0	0	0	0	0	0	0	0	0	0	0	0	0	0
	184	0	0	0	0	0	0	0	0	0	0	0	0	0	0	0	0	0	0	0	0									184	0	0	0	0	0	0	0	0	0	0	0	0	0	0	0	0	0	0	0
	185	0	0	0	0	0	0	0	0	0	0	0	0	0	0	0	0	0	0	0	0									185	0	0	0	0	0	0	0	0	0	0	0	0	0	0	0	0	0	0	0
	186	0	0	0	0	0	0	0	0	0	0	0	0	0	0	0	0	0	0	0	0									186	0	0	0	0	0	0	0	0	0	0	0	0	0	0	0	0	0	0	0
	187	0	0	0	0	0	0	0	0	0	0	0	0	0	0	0	0	0	0	0	0									187	0	0	0	0	0	0	0	0	0	0	0	0	0	0	0	0	0	0	0
	188	0	0	0	0	0	0	0	0	0	0	0	0	0	0	0	0	0	0	0	0									188	0	0	0	0	0	0	0	0	0	0	0	0	0	0	0	0	0	0	0
	189	0	0	0	0	0	0	0	0	0	0	0	0	0	0	0	0	0	0	0	0									189	0	0	0	0	0	0	0	0	0	0	0	0	0	0	0	0	0	0	0
	190	0	0	0	0	0	0	0	0	0	0	0	0	0	0	0	0	0	0	0	0									190	0	0	0	0	0	0	0	0	0	0	0	0	0	0	0	0	0	0	0
	191	0	0	0	0	0	0	0	0	0	0	0	0	0	0	0	0	0	0	0	0									191	0	0	0	0	0	0	0	0	0	0	0	0	0	0	0	0	0	0	0
	192	0	0	0	0	0	0	0	0	0	0	0	0	0	0	0	0	0	0	0	0									192	0	0	0	0	0	0	0	0	0	0	0	0	0	0	0	0	0	0	0
	193	0	0	0	0	0	0	0	0	0	0	0	0	0	0	0	0	0	0	0	0									193	0	0	0	0	0	0	0	0	0	0	0	0	0	0	0	0	0	0	0
	194	0	0	0	0	0	0	0	0	0	0	0	0	0	0	0	0	0	0	0	0									194	0	0	0	0	0	0	0	0	0	0	0	0	0	0	0	0	0	0	0
	195	0	0	0	0	0	0	0	0	0	0	0	0	0	0	0	0	0	0	0	0									195	0	0	0	0	0	0	0	0	0	0	0	0	0	0	0	0	0	0	0
	196	0	0	0	0	0	0	0	0	0	0	0	0	0	0	0	0	0	0	0	0									196	0	0	0	0	0	0	0	0	0	0	0	0	0	0	0	0	0	0	0
	197	0	0	0	0	0	0	0	0	0	0	0	0	0	0	0	0	0	0	0	0									197	0	0	0	0	0	0	0	0	0	0	0	0	0	0	0	0	0	0	0
	198	0	0	0	0	0	0	0	0	0	0	0	0	0	0	0	0	0	0	0	0									198	0	0	0	0	0	0	0	0	0	0	0	0	0	0	0	0	0	0	0
	199	0	0	0	0	0	0	0	0	0	0	0	0	0	0	0	0	0	0	0	0									199	0	0	0	0	0	0	0	0	0	0	0	0	0	0	0	0	0	0	0
	200	0	0	0	0	0	0	0	0	0	0	0	0	0	0	0	0	0	0	0	0									200	0	0	0	0	0	0	0	0	0	0	0	0	0	0	0	0	0	0	0
	201	0	0	0	0	0	0	0	0	0	0	0	0	0	0	0	0	0	0	0	0									201	0	0	0	0	0	0	0	0	0	0	0	0	0	0	0	0	0	0	0
	202	0	0	0	0	0	0	0	0	0	0	0	0	0	0	0	0	0	0	0	0									202	0	0	0	0	0	0	0	0	0	0	0	0	0	0	0	0	0	0	0
	203	0	0	0	0	0	0	0	0	0	0	0	0	0	0	0	0	0	0	0	0									203	0	0	0	0	0	0	0	0	0	0	0	0	0	0	0	0	0	0	0
	204	0	0	0	0	0	0	0	0	0	0	0	0	0	0	0	0	0	0	0	0									204	0	0	0	0	0	0	0	0	0	0	0	0	0	0	0	0	0	0	0
	205	0	0	0	0	0	0	0	0	0	0	0	0	0	0	0	0	0	0	0	0									205	0	0	0	0	0	0	0	0	0	0	0	0	0	0	0	0	0	0	0
	206	0	0	0	0	0	0	0	0	0	0	0	0	0	0	0	0	0	0	0	0									206	0	0	0	0	0	0	0	0	0	0	0	0	0	0	0	0	0	0	0
	207	0	0	0	0	0	0	0	0	0	0	0	0	0	0	0	0	0	0	0	0									207	0	0	0	0	0	0	0	0	0	0	0	0	0	0	0	0	0	0	0
	208	0	0	0	0	0	0	0	0	0	0	0	0	0	0	0	0	0	0	0	0									208	0	0	0	0	0	0	0	0	0	0	0	0	0	0	0	0	0	0	0
	209	0	0	0	0	0	0	0	0	0	0	0	0	0	0	0	0	0	0	0	0									209	0	0	0	0	0	0	0	0	0	0	0	0	0	0	0	0	0	0	0
	210	0	0	0	0	0	0	0	0	0	0	0	0	0	0	0	0	0	0	0	0									210	0	0	0	0	0	0	0	0	0	0	0	0	0	0	0	0	0	0	0
	211	0	0	0	0	0	0	0	0	0	0	0	0	0	0	0	0	0	0	0	0									211	0	0	0	0	0	0	0	0	0	0	0	0	0	0	0	0	0	0	0
	212	0	0	0	0	0	0	0	0	0	0	0	0	0	0	0	0	0	0	0	0									212	0	0	0	0	0	0	0	0	0	0	0	0	0	0	0	0	0	0	0
	213	0	0	0	0	0	0	0	0	0	0	0	0	0	0	0	0	0	0	0	0									213	0	0	0	0	0	0	0	0	0	0	0	0	0	0	0	0	0	0	0
	214	0	0	0	0	0	0	0	0	0	0	0	0	0	0	0	0	0	0	0	0									214	0	0	0	0	0	0	0	0	0	0	0	0	0	0	0	0	0	0	0
	215	0	0	0	0	0	0	0	0	0	0	0	0	0	0	0	0	0	0	0	0									215	0	0	0	0	0	0	0	0	0	0	0	0	0	0	0	0	0	0	0
	216	0	0	0	0	0	0	0	0	0	0	0	0	0	0	0	0	0	0	0	0									216	0	0	0	0	0	0	0	0	0	0	0	0	0	0	0	0	0	0	0
	217	0	0	0	0	0	0	0	0	0	0	0	0	0	0	0	0	0	0	0	0									217	0	0	0	0	0	0	0	0	0	0	0	0	0	0	0	0	0	0	0
	218	0	0	0	0	0	0	0	0	0	0	0	0	0	0	0	0	0	0	0	0									218	0	0	0	0	0	0	0	0	0	0	0	0	0	0	0	0	0	0	0
	219	0	0	0	0	0	0	0	0	0	0	0	0	0	0	0	0	0	0	0	0									219	0	0	0	0	0	0	0	0	0	0	0	0	0	0	0	0	0	0	0
	220	0	0	0	0	0	0	0	0	0	0	0	0	0	0	0	0	0	0	0	0									220	0	0	0	0	0	0	0	0	0	0	0	0	0	0	0	0	0	0	0
	221	0	0	0	0	0	0	0	0	0	0	0	0	0	0	0	0	0	0	0	0									221	0	0	0	0	0	0	0	0	0	0	0	0	0	0	0	0	0	0	0
	222	0	0	0	0	0	0	0	0	0	0	0	0	0	0	0	0	0	0	0	0									222	0	0	0	0	0	0	0	0	0	0	0	0	0	0	0	0	0	0	0
	223	0	0	0	0	0	0	0	0	0	0	0	0	0	0	0	0	0	0	0	0									223	0	0	0	0	0	0	0	0	0	0	0	0	0	0	0	0	0	0	0
	224	0	0	0	0	0	0	0	0	0	0	0	0	0	0	0	0	0	0	0	0									224	0	0	0	0	0	0	0	0	0	0	0	0	0	0	0	0	0	0	0
	225	0	0	0	0	0	0	0	0	0	0	0	0	0	0	0	0	0	0	0	0									225	0	0	0	0	0	0	0	0	0	0	0	0	0	0	0	0	0	0	0
	226	0	0	0	0	0	0	0	0	0	0	0	0	0	0	0	0	0	0	0	0									226	0	0	0	0	0	0	0	0	0	0	0	0	0	0	0	0	0	0	0
	227	0	0	0	0	0	0	0	0	0	0	0	0	0	0	0	0	0	0	0	0									227	0	0	0	0	0	0	0	0	0	0	0	0	0	0	0	0	0	0	0
	228	0	0	0	0	0	0	0	0	0	0	0	0	0	0	0	0	0	0	0	0									228	0	0	0	0	0	0	0	0	0	0	0	0	0	0	0	0	0	0	0
	229	0	0	0	0	0	0	0	0	0	0	0	0	0	0	0	0	0	0	0	0									229	0	0	0	0	0	0	0	0	0	0	0	0	0	0	0	0	0	0	0
	230	0	0	0	0	0	0	0	0	0	0	0	0	0	0	0	0	0	0	0	0									230	0	0	0	0	0	0	0	0	0	0	0	0	0	0	0	0	0	0	0
	231	0	0	0	0	0	0	0	0	0	0	0	0	0	0	0	0	0	0	0	0									231	0	0	0	0	0	0	0	0	0	0	0	0	0	0	0	0	0	0	0
	232	0	0	0	0	0	0	0	0	0	0	0	0	0	0	0	0	0	0	0	0									232	0	0	0	0	0	0	0	0	0	0	0	0	0	0	0	0	0	0	0
	233	0	0	0	0	0	0	0	0	0	0	0	0	0	0	0	0	0	0	0	0									233	0	0	0	0	0	0	0	0	0	0	0	0	0	0	0	0	0	0	0
	234	0	0	0	0	0	0	0	0	0	0	0	0	0	0	0	0	0	0	0	0									234	0	0	0	0	0	0	0	0	0	0	0	0	0	0	0	0	0	0	0
	235	0	0	0	0	0	0	0	0	0	0	0	0	0	0	0	0	0	0	0	0									235	0	0	0	0	0	0	0	0	0	0	0	0	0	0	0	0	0	0	0
	236	0	0	0	0	0	0	0	0	0	0	0	0	0	0	0	0	0	0	0	0									236	0	0	0	0	0	0	0	0	0	0	0	0	0	0	0	0	0	0	0
	237	0	0	0	0	0	0	0	0	0	0	0	0	0	0	0	0	0	0	0	0									237	0	0	0	0	0	0	0	0	0	0	0	0	0	0	0	0	0	0	0
	238	0	0	0	0	0	0	0	0	0	0	0	0	0	0	0	0	0	0	0	0									238	0	0	0	0	0	0	0	0	0	0	0	0	0	0	0	0	0	0	0
	239	0	0	0	0	0	0	0	0	0	0	0	0	0	0	0	0	0	0	0	0									239	0	0	0	0	0	0	0	0	0	0	0	0	0	0	0	0	0	0	0
	240	0	0	0	0	0	0	0	0	0	0	0	0	0	0	0	0	0	0	0	0									240	0	0	0	0	0	0	0	0	0	0	0	0	0	0	0	0	0	0	0
	241	0	0	0	0	0	0	0	0	0	0	0	0	0	0	0	0	0	0	0	0									241	0	0	0	0	0	0	0	0	0	0	0	0	0	0	0	0	0	0	0
	242	0	0	0	0	0	0	0	0	0	0	0	0	0	0	0	0	0	0	0	0									242	0	0	0	0	0	0	0	0	0	0	0	0	0	0	0	0	0	0	0
	243	0	0	0	0	0	0	0	0	0	0	0	0	0	0	0	0	0	0	0	0									243	0	0	0	0	0	0	0	0	0	0	0	0	0	0	0	0	0	0	0
	244	0	0	0	0	0	0	0	0	0	0	0	0	0	0	0	0	0	0	0	0									244	0	0	0	0	0	0	0	0	0	0	0	0	0	0	0	0	0	0	0
	245	0	0	0	0	0	0	0	0	0	0	0	0	0	0	0	0	0	0	0	0									245	0	0	0	0	0	0	0	0	0	0	0	0	0	0	0	0	0	0	0
	246	0	0	0	0	0	0	0	0	0	0	0	0	0	0	0	0	0	0	0	0									246	0	0	0	0	0	0	0	0	0	0	0	0	0	0	0	0	0	0	0
	247	0	0	0	0	0	0	0	0	0	0	0	0	0	0	0	0	0	0	0	0									247	0	0	0	0	0	0	0	0	0	0	0	0	0	0	0	0	0	0	0
	248	0	0	0	0	0	0	0	0	0	0	0	0	0	0	0	0	0	0	0	0									248	0	0	0	0	0	0	0	0	0	0	0	0	0	0	0	0	0	0	0
	249	0	0	0	0	0	0	0	0	0	0	0	0	0	0	0	0	0	0	0	0									249	0	0	0	0	0	0	0	0	0	0	0	0	0	0	0	0	0	0	0
	250	0	0	0	0	0	0	0	0	0	0	0	0	0	0	0	0	0	0	0	0									250	0	0	0	0	0	0	0	0	0	0	0	0	0	0	0	0	0	0	0
	251	0	0	0	0	0	0	0	0	0	0	0	0	0	0	0	0	0	0	0	0									251	0	0	0	0	0	0	0	0	0	0	0	0	0	0	0	0	0	0	0
	252	0	0	0	0	0	0	0	0	0	0	0	0	0	0	0	0	0	0	0	0									252	0	0	0	0	0	0	0	0	0	0	0	0	0	0	0	0	0	0	0
	253	0	0	0	0	0	0	0	0	0	0	0	0	0	0	0	0	0	0	0	0									253	0	0	0	0	0	0	0	0	0	0	0	0	0	0	0	0	0	0	0
	254	0	0	0	0	0	0	0	0	0	0	0	0	0	0	0	0	0	0	0	0									254	0	0	0	0	0	0	0	0	0	0	0	0	0	0	0	0	0	0	0
	255	0	0	0	0	0	0	0	0	0	0	0	0	0	0	0	0	0	0	0	0									255	0	0	0	0	0	0	0	0	0	0	0	0	0	0	0	0	0	0	0
	256	0	0	0	0	0	0	0	0	0	0	0	0	0	0	0	0	0	0	0	0									256	0	0	0	0	0	0	0	0	0	0	0	0	0	0	0	0	0	0	0
	257	0	0	0	0	0	0	0	0	0	0	0	0	0	0	0	0	0	0	0	0									257	0	0	0	0	0	0	0	0	0	0	0	0	0	0	0	0	0	0	0
	258	0	0	0	0	0	0	0	0	0	0	0	0	0	0	0	0	0	0	0	0									258	0	0	0	0	0	0	0	0	0	0	0	0	0	0	0	0	0	0	0
	259	0	0	0	0	0	0	0	0	0	0	0	0	0	0	0	0	0	0	0	0									259	0	0	0	0	0	0	0	0	0	0	0	0	0	0	0	0	0	0	0
	260	0	0	0	0	0	0	0	0	0	0	0	0	0	0	0	0	0	0	0	0									260	0	0	0	0	0	0	0	0	0	0	0	0	0	0	0	0	0	0	0
	261	0	0	0	0	0	0	0	0	0	0	0	0	0	0	0	0	0	0	0	0									261	0	0	0	0	0	0	0	0	0	0	0	0	0	0	0	0	0	0	0
	262	0	0	0	0	0	0	0	0	0	0	0	0	0	0	0	0	0	0	0	0									262	0	0	0	0	0	0	0	0	0	0	0	0	0	0	0	0	0	0	0
	263	0	0	0	0	0	0	0	0	0	0	0	0	0	0	0	0	0	0	0	0									263	0	0	0	0	0	0	0	0	0	0	0	0	0	0	0	0	0	0	0
	264	0	0	0	0	0	0	0	0	0	0	0	0	0	0	0	0	0	0	0	0									264	0	0	0	0	0	0	0	0	0	0	0	0	0	0	0	0	0	0	0
	265	0	0	0	0	0	0	0	0	0	0	0	0	0	0	0	0	0	0	0	0									265	0	0	0	0	0	0	0	0	0	0	0	0	0	0	0	0	0	0	0
	266	0	0	0	0	0	0	0	0	0	0	0	0	0	0	0	0	0	0	0	0									266	0	0	0	0	0	0	0	0	0	0	0	0	0	0	0	0	0	0	0
	267	0	0	0	0	0	0	0	0	0	0	0	0	0	0	0	0	0	0	0	0									267	0	0	0	0	0	0	0	0	0	0	0	0	0	0	0	0	0	0	0
	268	0	0	0	0	0	0	0	0	0	0	0	0	0	0	0	0	0	0	0	0									268	0	0	0	0	0	0	0	0	0	0	0	0	0	0	0	0	0	0	0
	269	0	0	0	0	0	0	0	0	0	0	0	0	0	0	0	0	0	0	0	0									269	0	0	0	0	0	0	0	0	0	0	0	0	0	0	0	0	0	0	0
	270	0	0	0	0	0	0	0	0	0	0	0	0	0	0	0	0	0	0	0	0									270	0	0	0	0	0	0	0	0	0	0	0	0	0	0	0	0	0	0	0
	271	0	0	0	0	0	0	0	0	0	0	0	0	0	0	0	0	0	0	0	0									271	0	0	0	0	0	0	0	0	0	0	0	0	0	0	0	0	0	0	0
	272	0	0	0	0	0	0	0	0	0	0	0	0	0	0	0	0	0	0	0	0									272	0	0	0	0	0	0	0	0	0	0	0	0	0	0	0	0	0	0	0
	273	0	0	0	0	0	0	0	0	0	0	0	0	0	0	0	0	0	0	0	0									273	0	0	0	0	0	0	0	0	0	0	0	0	0	0	0	0	0	0	0
	274	0	0	0	0	0	0	0	0	0	0	0	0	0	0	0	0	0	0	0	0									274	0	0	0	0	0	0	0	0	0	0	0	0	0	0	0	0	0	0	0
	275	0	0	0	0	0	0	0	0	0	0	0	0	0	0	0	0	0	0	0	0									275	0	0	0	0	0	0	0	0	0	0	0	0	0	0	0	0	0	0	0
	276	0	0	0	0	0	0	0	0	0	0	0	0	0	0	0	0	0	0	0	0									276	0	0	0	0	0	0	0	0	0	0	0	0	0	0	0	0	0	0	0
	277	0	0	0	0	0	0	0	0	0	0	0	0	0	0	0	0	0	0	0	0									277	0	0	0	0	0	0	0	0	0	0	0	0	0	0	0	0	0	0	0
	278	0	0	0	0	0	0	0	0	0	0	0	0	0	0	0	0	0	0	0	0									278	0	0	0	0	0	0	0	0	0	0	0	0	0	0	0	0	0	0	0
	279	0	0	0	0	0	0	0	0	0	0	0	0	0	0	0	0	0	0	0	0									279	0	0	0	0	0	0	0	0	0	0	0	0	0	0	0	0	0	0	0
	280	0	0	0	0	0	0	0	0	0	0	0	0	0	0	0	0	0	0	0	0									280	0	0	0	0	0	0	0	0	0	0	0	0	0	0	0	0	0	0	0
	281	0	0	0	0	0	0	0	0	0	0	0	0	0	0	0	0	0	0	0	0									281	0	0	0	0	0	0	0	0	0	0	0	0	0	0	0	0	0	0	0
	282	0	0	0	0	0	0	0	0	0	0	0	0	0	0	0	0	0	0	0	0									282	0	0	0	0	0	0	0	0	0	0	0	0	0	0	0	0	0	0	0
	283	0	0	0	0	0	0	0	0	0	0	0	0	0	0	0	0	0	0	0	0									283	0	0	0	0	0	0	0	0	0	0	0	0	0	0	0	0	0	0	0
	284	0	0	0	0	0	0	0	0	0	0	0	0	0	0	0	0	0	0	0	0									284	0	0	0	0	0	0	0	0	0	0	0	0	0	0	0	0	0	0	0
	285	0	0	0	0	0	0	0	0	0	0	0	0	0	0	0	0	0	0	0	0									285	0	0	0	0	0	0	0	0	0	0	0	0	0	0	0	0	0	0	0
	286	0	0	0	0	0	0	0	0	0	0	0	0	0	0	0	0	0	0	0	0									286	0	0	0	0	0	0	0	0	0	0	0	0	0	0	0	0	0	0	0
	287	0	0	0	0	0	0	0	0	0	0	0	0	0	0	0	0	0	0	0	0									287	0	0	0	0	0	0	0	0	0	0	0	0	0	0	0	0	0	0	0
	288	0	0	0	0	0	0	0	0	0	0	0	0	0	0	0	0	0	0	0	0									288	0	0	0	0	0	0	0	0	0	0	0	0	0	0	0	0	0	0	0
	289	0	0	0	0	0	0	0	0	0	0	0	0	0	0	0	0	0	0	0	0									289	0	0	0	0	0	0	0	0	0	0	0	0	0	0	0	0	0	0	0
	290	0	0	0	0	0	0	0	0	0	0	0	0	0	0	0	0	0	0	0	0									290	0	0	0	0	0	0	0	0	0	0	0	0	0	0	0	0	0	0	0
	291	0	0	0	0	0	0	0	0	0	0	0	0	0	0	0	0	0	0	0	0									291	0	0	0	0	0	0	0	0	0	0	0	0	0	0	0	0	0	0	0
	292	0	0	0	0	0	0	0	0	0	0	0	0	0	0	0	0	0	0	0	0									292	0	0	0	0	0	0	0	0	0	0	0	0	0	0	0	0	0	0	0
	293	0	0	0	0	0	0	0	0	0	0	0	0	0	0	0	0	0	0	0	0									293	0	0	0	0	0	0	0	0	0	0	0	0	0	0	0	0	0	0	0
	294	0	0	0	0	0	0	0	0	0	0	0	0	0	0	0	0	0	0	0	0									294	0	0	0	0	0	0	0	0	0	0	0	0	0	0	0	0	0	0	0
	295	0	0	0	0	0	0	0	0	0	0	0	0	0	0	0	0	0	0	0	0									295	0	0	0	0	0	0	0	0	0	0	0	0	0	0	0	0	0	0	0
	296	0	0	0	0	0	0	0	0	0	0	0	0	0	0	0	0	0	0	0	0									296	0	0	0	0	0	0	0	0	0	0	0	0	0	0	0	0	0	0	0
	297	0	0	0	0	0	0	0	0	0	0	0	0	0	0	0	0	0	0	0	0									297	0	0	0	0	0	0	0	0	0	0	0	0	0	0	0	0	0	0	0
	298	0	0	0	0	0	0	0	0	0	0	0	0	0	0	0	0	0	0	0	0									298	0	0	0	0	0	0	0	0	0	0	0	0	0	0	0	0	0	0	0
	299	0	0	0	0	0	0	0	0	0	0	0	0	0	0	0	0	0	0	0	0									299	0	0	0	0	0	0	0	0	0	0	0	0	0	0	0	0	0	0	0
	300	0	0	0	0	0	0	0	0	0	0	0	0	0	0	0	0	0	0	0	0									300	0	0	0	0	0	0	0	0	0	0	0	0	0	0	0	0	0	0	0
	301	0	0	0	0	0	0	0	0	0	0	0	0	0	0	0	0	0	0	0	0									301	0	0	0	0	0	0	0	0	0	0	0	0	0	0	0	0	0	0	0
	302	0	0	0	0	0	0	0	0	0	0	0	0	0	0	0	0	0	0	0	0									302	0	0	0	0	0	0	0	0	0	0	0	0	0	0	0	0	0	0	0
	303	0	0	0	0	0	0	0	0	0	0	0	0	0	0	0	0	0	0	0	0									303	0	0	0	0	0	0	0	0	0	0	0	0	0	0	0	0	0	0	0
	304	0	0	0	0	0	0	0	0	0	0	0	0	0	0	0	0	0	0	0	0									304	0	0	0	0	0	0	0	0	0	0	0	0	0	0	0	0	0	0	0
	305	0	0	0	0	0	0	0	0	0	0	0	0	0	0	0	0	0	0	0	0									305	0	0	0	0	0	0	0	0	0	0	0	0	0	0	0	0	0	0	0
	306	0	0	0	0	0	0	0	0	0	0	0	0	0	0	0	0	0	0	0	0									306	0	0	0	0	0	0	0	0	0	0	0	0	0	0	0	0	0	0	0
	307	0	0	0	0	0	0	0	0	0	0	0	0	0	0	0	0	0	0	0	0									307	0	0	0	0	0	0	0	0	0	0	0	0	0	0	0	0	0	0	0
	308	0	0	0	0	0	0	0	0	0	0	0	0	0	0	0	0	0	0	0	0									308	0	0	0	0	0	0	0	0	0	0	0	0	0	0	0	0	0	0	0
	309	0	0	0	0	0	0	0	0	0	0	0	0	0	0	0	0	0	0	0	0									309	0	0	0	0	0	0	0	0	0	0	0	0	0	0	0	0	0	0	0
	310	0	0	0	0	0	0	0	0	0	0	0	0	0	0	0	0	0	0	0	0									310	0	0	0	0	0	0	0	0	0	0	0	0	0	0	0	0	0	0	0
	311	0	0	0	0	0	0	0	0	0	0	0	0	0	0	0	0	0	0	0	0									311	0	0	0	0	0	0	0	0	0	0	0	0	0	0	0	0	0	0	0
	312	0	0	0	0	0	0	0	0	0	0	0	0	0	0	0	0	0	0	0	0									312	0	0	0	0	0	0	0	0	0	0	0	0	0	0	0	0	0	0	0
	313	0	0	0	0	0	0	0	0	0	0	0	0	0	0	0	0	0	0	0	0									313	0	0	0	0	0	0	0	0	0	0	0	0	0	0	0	0	0	0	0
	314	0	0	0	0	0	0	0	0	0	0	0	0	0	0	0	0	0	0	0	0									314	0	0	0	0	0	0	0	0	0	0	0	0	0	0	0	0	0	0	0
	315	0	0	0	0	0	0	0	0	0	0	0	0	0	0	0	0	0	0	0	0									315	0	0	0	0	0	0	0	0	0	0	0	0	0	0	0	0	0	0	0
	316	0	0	0	0	0	0	0	0	0	0	0	0	0	0	0	0	0	0	0	0									316	0	0	0	0	0	0	0	0	0	0	0	0	0	0	0	0	0	0	0
	317	0	0	0	0	0	0	0	0	0	0	0	0	0	0	0	0	0	0	0	0									317	0	0	0	0	0	0	0	0	0	0	0	0	0	0	0	0	0	0	0
	318	0	0	0	0	0	0	0	0	0	0	0	0	0	0	0	0	0	0	0	0									318	0	0	0	0	0	0	0	0	0	0	0	0	0	0	0	0	0	0	0
	319	0	0	0	0	0	0	0	0	0	0	0	0	0	0	0	0	0	0	0	0									319	0	0	0	0	0	0	0	0	0	0	0	0	0	0	0	0	0	0	0
	320	0	0	0	0	0	0	0	0	0	0	0	0	0	0	0	0	0	0	0	0									320	0	0	0	0	0	0	0	0	0	0	0	0	0	0	0	0	0	0	0
	321	0	0	0	0	0	0	0	0	0	0	0	0	0	0	0	0	0	0	0	0									321	0	0	0	0	0	0	0	0	0	0	0	0	0	0	0	0	0	0	0
	322	0	0	0	0	0	0	0	0	0	0	0	0	0	0	0	0	0	0	0	0									322	0	0	0	0	0	0	0	0	0	0	0	0	0	0	0	0	0	0	0
	323	0	0	0	0	0	0	0	0	0	0	0	0	0	0	0	0	0	0	0	0									323	0	0	0	0	0	0	0	0	0	0	0	0	0	0	0	0	0	0	0
	324	0	0	0	0	0	0	0	0	0	0	0	0	0	0	0	0	0	0	0	0									324	0	0	0	0	0	0	0	0	0	0	0	0	0	0	0	0	0	0	0
	325	0	0	0	0	0	0	0	0	0	0	0	0	0	0	0	0	0	0	0	0									325	0	0	0	0	0	0	0	0	0	0	0	0	0	0	0	0	0	0	0
	326	0	0	0	0	0	0	0	0	0	0	0	0	0	0	0	0	0	0	0	0									326	0	0	0	0	0	0	0	0	0	0	0	0	0	0	0	0	0	0	0
	327	0	0	0	0	0	0	0	0	0	0	0	0	0	0	0	0	0	0	0	0									327	0	0	0	0	0	0	0	0	0	0	0	0	0	0	0	0	0	0	0
	328	0	0	0	0	0	0	0	0	0	0	0	0	0	0	0	0	0	0	0	0									328	0	0	0	0	0	0	0	0	0	0	0	0	0	0	0	0	0	0	0
	329	0	0	0	0	0	0	0	0	0	0	0	0	0	0	0	0	0	0	0	0									329	0	0	0	0	0	0	0	0	0	0	0	0	0	0	0	0	0	0	0
	330	0	0	0	0	0	0	0	0	0	0	0	0	0	0	0	0	0	0	0	0									330	0	0	0	0	0	0	0	0	0	0	0	0	0	0	0	0	0	0	0
	331	0	0	0	0	0	0	0	0	0	0	0	0	0	0	0	0	0	0	0	0									331	0	0	0	0	0	0	0	0	0	0	0	0	0	0	0	0	0	0	0
	332	0	0	0	0	0	0	0	0	0	0	0	0	0	0	0	0	0	0	0	0									332	0	0	0	0	0	0	0	0	0	0	0	0	0	0	0	0	0	0	0
	333	0	0	0	0	0	0	0	0	0	0	0	0	0	0	0	0	0	0	0	0									333	0	0	0	0	0	0	0	0	0	0	0	0	0	0	0	0	0	0	0
	334	0	0	0	0	0	0	0	0	0	0	0	0	0	0	0	0	0	0	0	0									334	0	0	0	0	0	0	0	0	0	0	0	0	0	0	0	0	0	0	0
	335	0	0	0	0	0	0	0	0	0	0	0	0	0	0	0	0	0	0	0	0									335	0	0	0	0	0	0	0	0	0	0	0	0	0	0	0	0	0	0	0
	336	0	0	0	0	0	0	0	0	0	0	0	0	0	0	0	0	0	0	0	0									336	0	0	0	0	0	0	0	0	0	0	0	0	0	0	0	0	0	0	0
	337	0	0	0	0	0	0	0	0	0	0	0	0	0	0	0	0	0	0	0	0									337	0	0	0	0	0	0	0	0	0	0	0	0	0	0	0	0	0	0	0
	338	0	0	0	0	0	0	0	0	0	0	0	0	0	0	0	0	0	0	0	0									338	0	0	0	0	0	0	0	0	0	0	0	0	0	0	0	0	0	0	0
	339	0	0	0	0	0	0	0	0	0	0	0	0	0	0	0	0	0	0	0	0									339	0	0	0	0	0	0	0	0	0	0	0	0	0	0	0	0	0	0	0
	340	0	0	0	0	0	0	0	0	0	0	0	0	0	0	0	0	0	0	0	0									340	0	0	0	0	0	0	0	0	0	0	0	0	0	0	0	0	0	0	0
	341	0	0	0	0	0	0	0	0	0	0	0	0	0	0	0	0	0	0	0	0									341	0	0	0	0	0	0	0	0	0	0	0	0	0	0	0	0	0	0	0
	342	0	0	0	0	0	0	0	0	0	0	0	0	0	0	0	0	0	0	0	0									342	0	0	0	0	0	0	0	0	0	0	0	0	0	0	0	0	0	0	0
	343	0	0	0	0	0	0	0	0	0	0	0	0	0	0	0	0	0	0	0	0									343	0	0	0	0	0	0	0	0	0	0	0	0	0	0	0	0	0	0	0
	344	0	0	0	0	0	0	0	0	0	0	0	0	0	0	0	0	0	0	0	0									344	0	0	0	0	0	0	0	0	0	0	0	0	0	0	0	0	0	0	0
	345	0	0	0	0	0	0	0	0	0	0	0	0	0	0	0	0	0	0	0	0									345	0	0	0	0	0	0	0	0	0	0	0	0	0	0	0	0	0	0	0
	346	0	0	0	0	0	0	0	0	0	0	0	0	0	0	0	0	0	0	0	0									346	0	0	0	0	0	0	0	0	0	0	0	0	0	0	0	0	0	0	0
	347	0	0	0	0	0	0	0	0	0	0	0	0	0	0	0	0	0	0	0	0									347	0	0	0	0	0	0	0	0	0	0	0	0	0	0	0	0	0	0	0
	348	0	0	0	0	0	0	0	0	0	0	0	0	0	0	0	0	0	0	0	0									348	0	0	0	0	0	0	0	0	0	0	0	0	0	0	0	0	0	0	0
	349	0	0	0	0	0	0	0	0	0	0	0	0	0	0	0	0	0	0	0	0									349	0	0	0	0	0	0	0	0	0	0	0	0	0	0	0	0	0	0	0
	350	0	0	0	0	0	0	0	0	0	0	0	0	0	0	0	0	0	0	0	0									350	0	0	0	0	0	0	0	0	0	0	0	0	0	0	0	0	0	0	0
	351	0	0	0	0	0	0	0	0	0	0	0	0	0	0	0	0	0	0	0	0									351	0	0	0	0	0	0	0	0	0	0	0	0	0	0	0	0	0	0	0
	352	0	0	0	0	0	0	0	0	0	0	0	0	0	0	0	0	0	0	0	0									352	0	0	0	0	0	0	0	0	0	0	0	0	0	0	0	0	0	0	0
	353	0	0	0	0	0	0	0	0	0	0	0	0	0	0	0	0	0	0	0	0									353	0	0	0	0	0	0	0	0	0	0	0	0	0	0	0	0	0	0	0
	354	0	0	0	0	0	0	0	0	0	0	0	0	0	0	0	0	0	0	0	0									354	0	0	0	0	0	0	0	0	0	0	0	0	0	0	0	0	0	0	0
	355	0	0	0	0	0	0	0	0	0	0	0	0	0	0	0	0	0	0	0	0									355	0	0	0	0	0	0	0	0	0	0	0	0	0	0	0	0	0	0	0
	356	0	0	0	0	0	0	0	0	0	0	0	0	0	0	0	0	0	0	0	0									356	0	0	0	0	0	0	0	0	0	0	0	0	0	0	0	0	0	0	0
	357	0	0	0	0	0	0	0	0	0	0	0	0	0	0	0	0	0	0	0	0									357	0	0	0	0	0	0	0	0	0	0	0	0	0	0	0	0	0	0	0
	358	0	0	0	0	0	0	0	0	0	0	0	0	0	0	0	0	0	0	0	0									358	0	0	0	0	0	0	0	0	0	0	0	0	0	0	0	0	0	0	0
	359	0	0	0	0	0	0	0	0	0	0	0	0	0	0	0	0	0	0	0	0									359	0	0	0	0	0	0	0	0	0	0	0	0	0	0	0	0	0	0	0
	360	0	0	0	0	0	0	0	0	0	0	0	0	0	0	0	0	0	0	0	0									360	0	0	0	0	0	0	0	0	0	0	0	0	0	0	0	0	0	0	0
	361	0	0	0	0	0	0	0	0	0	0	0	0	0	0	0	0	0	0	0	0									361	0	0	0	0	0	0	0	0	0	0	0	0	0	0	0	0	0	0	0
	362	0	0	0	0	0	0	0	0	0	0	0	0	0	0	0	0	0	0	0	0									362	0	0	0	0	0	0	0	0	0	0	0	0	0	0	0	0	0	0	0
	363	0	0	0	0	0	0	0	0	0	0	0	0	0	0	0	0	0	0	0	0									363	0	0	0	0	0	0	0	0	0	0	0	0	0	0	0	0	0	0	0
	364	0	0	0	0	0	0	0	0	0	0	0	0	0	0	0	0	0	0	0	0									364	0	0	0	0	0	0	0	0	0	0	0	0	0	0	0	0	0	0	0
	365	0	0	0	0	0	0	0	0	0	0	0	0	0	0	0	0	0	0	0	0									365	0	0	0	0	0	0	0	0	0	0	0	0	0	0	0	0	0	0	0
	366	0	0	0	0	0	0	0	0	0	0	0	0	0	0	0	0	0	0	0	0									366	0	0	0	0	0	0	0	0	0	0	0	0	0	0	0	0	0	0	0
	367	0	0	0	0	0	0	0	0	0	0	0	0	0	0	0	0	0	0	0	0									367	0	0	0	0	0	0	0	0	0	0	0	0	0	0	0	0	0	0	0
	368	0	0	0	0	0	0	0	0	0	0	0	0	0	0	0	0	0	0	0	0									368	0	0	0	0	0	0	0	0	0	0	0	0	0	0	0	0	0	0	0
	369	0	0	0	0	0	0	0	0	0	0	0	0	0	0	0	0	0	0	0	0									369	0	0	0	0	0	0	0	0	0	0	0	0	0	0	0	0	0	0	0
	370	0	0	0	0	0	0	0	0	0	0	0	0	0	0	0	0	0	0	0	0									370	0	0	0	0	0	0	0	0	0	0	0	0	0	0	0	0	0	0	0
	371	0	0	0	0	0	0	0	0	0	0	0	0	0	0	0	0	0	0	0	0									371	0	0	0	0	0	0	0	0	0	0	0	0	0	0	0	0	0	0	0
	372	0	0	0	0	0	0	0	0	0	0	0	0	0	0	0	0	0	0	0	0									372	0	0	0	0	0	0	0	0	0	0	0	0	0	0	0	0	0	0	0
	373	0	0	0	0	0	0	0	0	0	0	0	0	0	0	0	0	0	0	0	0									373	0	0	0	0	0	0	0	0	0	0	0	0	0	0	0	0	0	0	0
	374	0	0	0	0	0	0	0	0	0	0	0	0	0	0	0	0	0	0	0	0									374	0	0	0	0	0	0	0	0	0	0	0	0	0	0	0	0	0	0	0
	375	0	0	0	0	0	0	0	0	0	0	0	0	0	0	0	0	0	0	0	0									375	0	0	0	0	0	0	0	0	0	0	0	0	0	0	0	0	0	0	0
	376	0	0	0	0	0	0	0	0	0	0	0	0	0	0	0	0	0	0	0	0									376	0	0	0	0	0	0	0	0	0	0	0	0	0	0	0	0	0	0	0
	377	0	0	0	0	0	0	0	0	0	0	0	0	0	0	0	0	0	0	0	0									377	0	0	0	0	0	0	0	0	0	0	0	0	0	0	0	0	0	0	0
	378	0	0	0	0	0	0	0	0	0	0	0	0	0	0	0	0	0	0	0	0									378	0	0	0	0	0	0	0	0	0	0	0	0	0	0	0	0	0	0	0
	379	0	0	0	0	0	0	0	0	0	0	0	0	0	0	0	0	0	0	0	0									379	0	0	0	0	0	0	0	0	0	0	0	0	0	0	0	0	0	0	0
	380	0	0	0	0	0	0	0	0	0	0	0	0	0	0	0	0	0	0	0	0									380	0	0	0	0	0	0	0	0	0	0	0	0	0	0	0	0	0	0	0
	381	0	0	0	0	0	0	0	0	0	0	0	0	0	0	0	0	0	0	0	0									381	0	0	0	0	0	0	0	0	0	0	0	0	0	0	0	0	0	0	0
	382	0	0	0	0	0	0	0	0	0	0	0	0	0	0	0	0	0	0	0	0									382	0	0	0	0	0	0	0	0	0	0	0	0	0	0	0	0	0	0	0
	383	0	0	0	0	0	0	0	0	0	0	0	0	0	0	0	0	0	0	0	0									383	0	0	0	0	0	0	0	0	0	0	0	0	0	0	0	0	0	0	0
	384	0	0	0	0	0	0	0	0	0	0	0	0	0	0	0	0	0	0	0	0									384	0	0	0	0	0	0	0	0	0	0	0	0	0	0	0	0	0	0	0
	385	0	0	0	0	0	0	0	0	0	0	0	0	0	0	0	0	0	0	0	0									385	0	0	0	0	0	0	0	0	0	0	0	0	0	0	0	0	0	0	0
	386	0	0	0	0	0	0	0	0	0	0	0	0	0	0	0	0	0	0	0	0									386	0	0	0	0	0	0	0	0	0	0	0	0	0	0	0	0	0	0	0
	387	0	0	0	0	0	0	0	0	0	0	0	0	0	0	0	0	0	0	0	0									387	0	0	0	0	0	0	0	0	0	0	0	0	0	0	0	0	0	0	0
	388	0	0	0	0	0	0	0	0	0	0	0	0	0	0	0	0	0	0	0	0									388	0	0	0	0	0	0	0	0	0	0	0	0	0	0	0	0	0	0	0
	389	0	0	0	0	0	0	0	0	0	0	0	0	0	0	0	0	0	0	0	0									389	0	0	0	0	0	0	0	0	0	0	0	0	0	0	0	0	0	0	0
	390	0	0	0	0	0	0	0	0	0	0	0	0	0	0	0	0	0	0	0	0									390	0	0	0	0	0	0	0	0	0	0	0	0	0	0	0	0	0	0	0
	391	0	0	0	0	0	0	0	0	0	0	0	0	0	0	0	0	0	0	0	0									391	0	0	0	0	0	0	0	0	0	0	0	0	0	0	0	0	0	0	0
	392	0	0	0	0	0	0	0	0	0	0	0	0	0	0	0	0	0	0	0	0									392	0	0	0	0	0	0	0	0	0	0	0	0	0	0	0	0	0	0	0
	393	0	0	0	0	0	0	0	0	0	0	0	0	0	0	0	0	0	0	0	0									393	0	0	0	0	0	0	0	0	0	0	0	0	0	0	0	0	0	0	0
	394	0	0	0	0	0	0	0	0	0	0	0	0	0	0	0	0	0	0	0	0									394	0	0	0	0	0	0	0	0	0	0	0	0	0	0	0	0	0	0	0
	395	0	0	0	0	0	0	0	0	0	0	0	0	0	0	0	0	0	0	0	0									395	0	0	0	0	0	0	0	0	0	0	0	0	0	0	0	0	0	0	0
	396	0	0	0	0	0	0	0	0	0	0	0	0	0	0	0	0	0	0	0	0									396	0	0	0	0	0	0	0	0	0	0	0	0	0	0	0	0	0	0	0
	397	0	0	0	0	0	0	0	0	0	0	0	0	0	0	0	0	0	0	0	0									397	0	0	0	0	0	0	0	0	0	0	0	0	0	0	0	0	0	0	0
	398	0	0	0	0	0	0	0	0	0	0	0	0	0	0	0	0	0	0	0	0									398	0	0	0	0	0	0	0	0	0	0	0	0	0	0	0	0	0	0	0
	399	0	0	0	0	0	0	0	0	0	0	0	0	0	0	0	0	0	0	0	0									399	0	0	0	0	0	0	0	0	0	0	0	0	0	0	0	0	0	0	0
	400	0	0	0	0	0	0	0	0	0	0	0	0	0	0	0	0	0	0	0	0									400	0	0	0	0	0	0	0	0	0	0	0	0	0	0	0	0	0	0	0
	401	0	0	0	0	0	0	0	0	0	0	0	0	0	0	0	0	0	0	0	0									401	0	0	0	0	0	0	0	0	0	0	0	0	0	0	0	0	0	0	0
	402	0	0	0	0	0	0	0	0	0	0	0	0	0	0	0	0	0	0	0	0									402	0	0	0	0	0	0	0	0	0	0	0	0	0	0	0	0	0	0	0
	403	0	0	0	0	0	0	0	0	0	0	0	0	0	0	0	0	0	0	0	0									403	0	0	0	0	0	0	0	0	0	0	0	0	0	0	0	0	0	0	0
	404	0	0	0	0	0	0	0	0	0	0	0	0	0	0	0	0	0	0	0	0									404	0	0	0	0	0	0	0	0	0	0	0	0	0	0	0	0	0	0	0
	405	0	0	0	0	0	0	0	0	0	0	0	0	0	0	0	0	0	0	0	0									405	0	0	0	0	0	0	0	0	0	0	0	0	0	0	0	0	0	0	0
	406	0	0	0	0	0	0	0	0	0	0	0	0	0	0	0	0	0	0	0	0									406	0	0	0	0	0	0	0	0	0	0	0	0	0	0	0	0	0	0	0
	407	0	0	0	0	0	0	0	0	0	0	0	0	0	0	0	0	0	0	0	0									407	0	0	0	0	0	0	0	0	0	0	0	0	0	0	0	0	0	0	0
	408	0	0	0	0	0	0	0	0	0	0	0	0	0	0	0	0	0	0	0	0									408	0	0	0	0	0	0	0	0	0	0	0	0	0	0	0	0	0	0	0
	409	0	0	0	0	0	0	0	0	0	0	0	0	0	0	0	0	0	0	0	0									409	0	0	0	0	0	0	0	0	0	0	0	0	0	0	0	0	0	0	0
	410	0	0	0	0	0	0	0	0	0	0	0	0	0	0	0	0	0	0	0	0									410	0	0	0	0	0	0	0	0	0	0	0	0	0	0	0	0	0	0	0
	411	0	0	0	0	0	0	0	0	0	0	0	0	0	0	0	0	0	0	0	0									411	0	0	0	0	0	0	0	0	0	0	0	0	0	0	0	0	0	0	0
	412	0	0	0	0	0	0	0	0	0	0	0	0	0	0	0	0	0	0	0	0									412	0	0	0	0	0	0	0	0	0	0	0	0	0	0	0	0	0	0	0
	413	0	0	0	0	0	0	0	0	0	0	0	0	0	0	0	0	0	0	0	0									413	0	0	0	0	0	0	0	0	0	0	0	0	0	0	0	0	0	0	0
	414	0	0	0	0	0	0	0	0	0	0	0	0	0	0	0	0	0	0	0	0									414	0	0	0	0	0	0	0	0	0	0	0	0	0	0	0	0	0	0	0
	415	0	0	0	0	0	0	0	0	0	0	0	0	0	0	0	0	0	0	0	0									415	0	0	0	0	0	0	0	0	0	0	0	0	0	0	0	0	0	0	0
	416	0	0	0	0	0	0	0	0	0	0	0	0	0	0	0	0	0	0	0	0									416	0	0	0	0	0	0	0	0	0	0	0	0	0	0	0	0	0	0	0
	417	0	0	0	0	0	0	0	0	0	0	0	0	0	0	0	0	0	0	0	0									417	0	0	0	0	0	0	0	0	0	0	0	0	0	0	0	0	0	0	0
	418	0	0	0	0	0	0	0	0	0	0	0	0	0	0	0	0	0	0	0	0									418	0	0	0	0	0	0	0	0	0	0	0	0	0	0	0	0	0	0	0
	419	0	0	0	0	0	0	0	0	0	0	0	0	0	0	0	0	0	0	0	0									419	0	0	0	0	0	0	0	0	0	0	0	0	0	0	0	0	0	0	0
	420	0	0	0	0	0	0	0	0	0	0	0	0	0	0	0	0	0	0	0	0									420	0	0	0	0	0	0	0	0	0	0	0	0	0	0	0	0	0	0	0
	421	0	0	0	0	0	0	0	0	0	0	0	0	0	0	0	0	0	0	0	0									421	0	0	0	0	0	0	0	0	0	0	0	0	0	0	0	0	0	0	0
	422	0	0	0	0	0	0	0	0	0	0	0	0	0	0	0	0	0	0	0	0									422	0	0	0	0	0	0	0	0	0	0	0	0	0	0	0	0	0	0	0
	423	0	0	0	0	0	0	0	0	0	0	0	0	0	0	0	0	0	0	0	0									423	0	0	0	0	0	0	0	0	0	0	0	0	0	0	0	0	0	0	0
	424	0	0	0	0	0	0	0	0	0	0	0	0	0	0	0	0	0	0	0	0									424	0	0	0	0	0	0	0	0	0	0	0	0	0	0	0	0	0	0	0
	425	0	0	0	0	0	0	0	0	0	0	0	0	0	0	0	0	0	0	0	0									425	0	0	0	0	0	0	0	0	0	0	0	0	0	0	0	0	0	0	0
	426	0	0	0	0	0	0	0	0	0	0	0	0	0	0	0	0	0	0	0	0									426	0	0	0	0	0	0	0	0	0	0	0	0	0	0	0	0	0	0	0
	427	0	0	0	0	0	0	0	0	0	0	0	0	0	0	0	0	0	0	0	0									427	0	0	0	0	0	0	0	0	0	0	0	0	0	0	0	0	0	0	0
	428	0	0	0	0	0	0	0	0	0	0	0	0	0	0	0	0	0	0	0	0									428	0	0	0	0	0	0	0	0	0	0	0	0	0	0	0	0	0	0	0
	429	0	0	0	0	0	0	0	0	0	0	0	0	0	0	0	0	0	0	0	0									429	0	0	0	0	0	0	0	0	0	0	0	0	0	0	0	0	0	0	0
	430	0	0	0	0	0	0	0	0	0	0	0	0	0	0	0	0	0	0	0	0									430	0	0	0	0	0	0	0	0	0	0	0	0	0	0	0	0	0	0	0
	431	0	0	0	0	0	0	0	0	0	0	0	0	0	0	0	0	0	0	0	0									431	0	0	0	0	0	0	0	0	0	0	0	0	0	0	0	0	0	0	0
	432	0	0	0	0	0	0	0	0	0	0	0	0	0	0	0	0	0	0	0	0									432	0	0	0	0	0	0	0	0	0	0	0	0	0	0	0	0	0	0	0
	433	0	0	0	0	0	0	0	0	0	0	0	0	0	0	0	0	0	0	0	0									433	0	0	0	0	0	0	0	0	0	0	0	0	0	0	0	0	0	0	0
	434	0	0	0	0	0	0	0	0	0	0	0	0	0	0	0	0	0	0	0	0									434	0	0	0	0	0	0	0	0	0	0	0	0	0	0	0	0	0	0	0
	435	0	0	0	0	0	0	0	0	0	0	0	0	0	0	0	0	0	0	0	0									435	0	0	0	0	0	0	0	0	0	0	0	0	0	0	0	0	0	0	0
	436	0	0	0	0	0	0	0	0	0	0	0	0	0	0	0	0	0	0	0	0									436	0	0	0	0	0	0	0	0	0	0	0	0	0	0	0	0	0	0	0
	437	0	0	0	0	0	0	0	0	0	0	0	0	0	0	0	0	0	0	0	0									437	0	0	0	0	0	0	0	0	0	0	0	0	0	0	0	0	0	0	0
	438	0	0	0	0	0	0	0	0	0	0	0	0	0	0	0	0	0	0	0	0									438	0	0	0	0	0	0	0	0	0	0	0	0	0	0	0	0	0	0	0
	439	0	0	0	0	0	0	0	0	0	0	0	0	0	0	0	0	0	0	0	0									439	0	0	0	0	0	0	0	0	0	0	0	0	0	0	0	0	0	0	0
	440	0	0	0	0	0	0	0	0	0	0	0	0	0	0	0	0	0	0	0	0									440	0	0	0	0	0	0	0	0	0	0	0	0	0	0	0	0	0	0	0
	441	0	0	0	0	0	0	0	0	0	0	0	0	0	0	0	0	0	0	0	0									441	0	0	0	0	0	0	0	0	0	0	0	0	0	0	0	0	0	0	0
	442	0	0	0	0	0	0	0	0	0	0	0	0	0	0	0	0	0	0	0	0									442	0	0	0	0	0	0	0	0	0	0	0	0	0	0	0	0	0	0	0
	443	0	0	0	0	0	0	0	0	0	0	0	0	0	0	0	0	0	0	0	0									443	0	0	0	0	0	0	0	0	0	0	0	0	0	0	0	0	0	0	0
	444	0	0	0	0	0	0	0	0	0	0	0	0	0	0	0	0	0	0	0	0									444	0	0	0	0	0	0	0	0	0	0	0	0	0	0	0	0	0	0	0
	445	0	0	0	0	0	0	0	0	0	0	0	0	0	0	0	0	0	0	0	0									445	0	0	0	0	0	0	0	0	0	0	0	0	0	0	0	0	0	0	0
	446	0	0	0	0	0	0	0	0	0	0	0	0	0	0	0	0	0	0	0	0									446	0	0	0	0	0	0	0	0	0	0	0	0	0	0	0	0	0	0	0
	447	0	0	0	0	0	0	0	0	0	0	0	0	0	0	0	0	0	0	0	0									447	0	0	0	0	0	0	0	0	0	0	0	0	0	0	0	0	0	0	0
	448	0	0	0	0	0	0	0	0	0	0	0	0	0	0	0	0	0	0	0	0									448	0	0	0	0	0	0	0	0	0	0	0	0	0	0	0	0	0	0	0
	449	0	0	0	0	0	0	0	0	0	0	0	0	0	0	0	0	0	0	0	0									449	0	0	0	0	0	0	0	0	0	0	0	0	0	0	0	0	0	0	0
	450	0	0	0	0	0	0	0	0	0	0	0	0	0	0	0	0	0	0	0	0									450	0	0	0	0	0	0	0	0	0	0	0	0	0	0	0	0	0	0	0
	451	0	0	0	0	0	0	0	0	0	0	0	0	0	0	0	0	0	0	0	0									451	0	0	0	0	0	0	0	0	0	0	0	0	0	0	0	0	0	0	0
	452	0	0	0	0	0	0	0	0	0	0	0	0	0	0	0	0	0	0	0	0									452	0	0	0	0	0	0	0	0	0	0	0	0	0	0	0	0	0	0	0
	453	0	0	0	0	0	0	0	0	0	0	0	0	0	0	0	0	0	0	0	0									453	0	0	0	0	0	0	0	0	0	0	0	0	0	0	0	0	0	0	0
	454	0	0	0	0	0	0	0	0	0	0	0	0	0	0	0	0	0	0	0	0									454	0	0	0	0	0	0	0	0	0	0	0	0	0	0	0	0	0	0	0
	455	0	0	0	0	0	0	0	0	0	0	0	0	0	0	0	0	0	0	0	0									455	0	0	0	0	0	0	0	0	0	0	0	0	0	0	0	0	0	0	0
	456	0	0	0	0	0	0	0	0	0	0	0	0	0	0	0	0	0	0	0	0									456	0	0	0	0	0	0	0	0	0	0	0	0	0	0	0	0	0	0	0
	457	0	0	0	0	0	0	0	0	0	0	0	0	0	0	0	0	0	0	0	0									457	0	0	0	0	0	0	0	0	0	0	0	0	0	0	0	0	0	0	0
	458	0	0	0	0	0	0	0	0	0	0	0	0	0	0	0	0	0	0	0	0									458	0	0	0	0	0	0	0	0	0	0	0	0	0	0	0	0	0	0	0
	459	0	0	0	0	0	0	0	0	0	0	0	0	0	0	0	0	0	0	0	0									459	0	0	0	0	0	0	0	0	0	0	0	0	0	0	0	0	0	0	0
	460	0	0	0	0	0	0	0	0	0	0	0	0	0	0	0	0	0	0	0	0									460	0	0	0	0	0	0	0	0	0	0	0	0	0	0	0	0	0	0	0
	461	0	0	0	0	0	0	0	0	0	0	0	0	0	0	0	0	0	0	0	0									461	0	0	0	0	0	0	0	0	0	0	0	0	0	0	0	0	0	0	0
	462	0	0	0	0	0	0	0	0	0	0	0	0	0	0	0	0	0	0	0	0									462	0	0	0	0	0	0	0	0	0	0	0	0	0	0	0	0	0	0	0
	463	0	0	0	0	0	0	0	0	0	0	0	0	0	0	0	0	0	0	0	0									463	0	0	0	0	0	0	0	0	0	0	0	0	0	0	0	0	0	0	0
	464	0	0	0	0	0	0	0	0	0	0	0	0	0	0	0	0	0	0	0	0									464	0	0	0	0	0	0	0	0	0	0	0	0	0	0	0	0	0	0	0
	465	0	0	0	0	0	0	0	0	0	0	0	0	0	0	0	0	0	0	0	0									465	0	0	0	0	0	0	0	0	0	0	0	0	0	0	0	0	0	0	0
	466	0	0	0	0	0	0	0	0	0	0	0	0	0	0	0	0	0	0	0	0									466	0	0	0	0	0	0	0	0	0	0	0	0	0	0	0	0	0	0	0
	467	0	0	0	0	0	0	0	0	0	0	0	0	0	0	0	0	0	0	0	0									467	0	0	0	0	0	0	0	0	0	0	0	0	0	0	0	0	0	0	0
	468	0	0	0	0	0	0	0	0	0	0	0	0	0	0	0	0	0	0	0	0									468	0	0	0	0	0	0	0	0	0	0	0	0	0	0	0	0	0	0	0
	469	0	0	0	0	0	0	0	0	0	0	0	0	0	0	0	0	0	0	0	0									469	0	0	0	0	0	0	0	0	0	0	0	0	0	0	0	0	0	0	0
	470	0	0	0	0	0	0	0	0	0	0	0	0	0	0	0	0	0	0	0	0									470	0	0	0	0	0	0	0	0	0	0	0	0	0	0	0	0	0	0	0
	471	0	0	0	0	0	0	0	0	0	0	0	0	0	0	0	0	0	0	0	0									471	0	0	0	0	0	0	0	0	0	0	0	0	0	0	0	0	0	0	0
	472	0	0	0	0	0	0	0	0	0	0	0	0	0	0	0	0	0	0	0	0									472	0	0	0	0	0	0	0	0	0	0	0	0	0	0	0	0	0	0	0
	473	0	0	0	0	0	0	0	0	0	0	0	0	0	0	0	0	0	0	0	0									473	0	0	0	0	0	0	0	0	0	0	0	0	0	0	0	0	0	0	0
	474	0	0	0	0	0	0	0	0	0	0	0	0	0	0	0	0	0	0	0	0									474	0	0	0	0	0	0	0	0	0	0	0	0	0	0	0	0	0	0	0
	475	0	0	0	0	0	0	0	0	0	0	0	0	0	0	0	0	0	0	0	0									475	0	0	0	0	0	0	0	0	0	0	0	0	0	0	0	0	0	0	0
	476	0	0	0	0	0	0	0	0	0	0	0	0	0	0	0	0	0	0	0	0									476	0	0	0	0	0	0	0	0	0	0	0	0	0	0	0	0	0	0	0
	477	0	0	0	0	0	0	0	0	0	0	0	0	0	0	0	0	0	0	0	0									477	0	0	0	0	0	0	0	0	0	0	0	0	0	0	0	0	0	0	0
	478	0	0	0	0	0	0	0	0	0	0	0	0	0	0	0	0	0	0	0	0									478	0	0	0	0	0	0	0	0	0	0	0	0	0	0	0	0	0	0	0
	479	0	0	0	0	0	0	0	0	0	0	0	0	0	0	0	0	0	0	0	0									479	0	0	0	0	0	0	0	0	0	0	0	0	0	0	0	0	0	0	0
	480	0	0	0	0	0	0	0	0	0	0	0	0	0	0	0	0	0	0	0	0									480	0	0	0	0	0	0	0	0	0	0	0	0	0	0	0	0	0	0	0
	481	0	0	0	0	0	0	0	0	0	0	0	0	0	0	0	0	0	0	0	0									481	0	0	0	0	0	0	0	0	0	0	0	0	0	0	0	0	0	0	0
	482	0	0	0	0	0	0	0	0	0	0	0	0	0	0	0	0	0	0	0	0									482	0	0	0	0	0	0	0	0	0	0	0	0	0	0	0	0	0	0	0
	483	0	0	0	0	0	0	0	0	0	0	0	0	0	0	0	0	0	0	0	0									483	0	0	0	0	0	0	0	0	0	0	0	0	0	0	0	0	0	0	0
	484	0	0	0	0	0	0	0	0	0	0	0	0	0	0	0	0	0	0	0	0									484	0	0	0	0	0	0	0	0	0	0	0	0	0	0	0	0	0	0	0
	485	0	0	0	0	0	0	0	0	0	0	0	0	0	0	0	0	0	0	0	0									485	0	0	0	0	0	0	0	0	0	0	0	0	0	0	0	0	0	0	0
	486	0	0	0	0	0	0	0	0	0	0	0	0	0	0	0	0	0	0	0	0									486	0	0	0	0	0	0	0	0	0	0	0	0	0	0	0	0	0	0	0
	487	0	0	0	0	0	0	0	0	0	0	0	0	0	0	0	0	0	0	0	0									487	0	0	0	0	0	0	0	0	0	0	0	0	0	0	0	0	0	0	0
	488	0	0	0	0	0	0	0	0	0	0	0	0	0	0	0	0	0	0	0	0									488	0	0	0	0	0	0	0	0	0	0	0	0	0	0	0	0	0	0	0
	489	0	0	0	0	0	0	0	0	0	0	0	0	0	0	0	0	0	0	0	0									489	0	0	0	0	0	0	0	0	0	0	0	0	0	0	0	0	0	0	0
	490	0	0	0	0	0	0	0	0	0	0	0	0	0	0	0	0	0	0	0	0									490	0	0	0	0	0	0	0	0	0	0	0	0	0	0	0	0	0	0	0
	491	0	0	0	0	0	0	0	0	0	0	0	0	0	0	0	0	0	0	0	0									491	0	0	0	0	0	0	0	0	0	0	0	0	0	0	0	0	0	0	0
	492	0	0	0	0	0	0	0	0	0	0	0	0	0	0	0	0	0	0	0	0									492	0	0	0	0	0	0	0	0	0	0	0	0	0	0	0	0	0	0	0
	493	0	0	0	0	0	0	0	0	0	0	0	0	0	0	0	0	0	0	0	0									493	0	0	0	0	0	0	0	0	0	0	0	0	0	0	0	0	0	0	0
	494	0	0	0	0	0	0	0	0	0	0	0	0	0	0	0	0	0	0	0	0									494	0	0	0	0	0	0	0	0	0	0	0	0	0	0	0	0	0	0	0
	495	0	0	0	0	0	0	0	0	0	0	0	0	0	0	0	0	0	0	0	0									495	0	0	0	0	0	0	0	0	0	0	0	0	0	0	0	0	0	0	0
	496	0	0	0	0	0	0	0	0	0	0	0	0	0	0	0	0	0	0	0	0									496	0	0	0	0	0	0	0	0	0	0	0	0	0	0	0	0	0	0	0
	497	0	0	0	0	0	0	0	0	0	0	0	0	0	0	0	0	0	0	0	0									497	0	0	0	0	0	0	0	0	0	0	0	0	0	0	0	0	0	0	0
	498	0	0	0	0	0	0	0	0	0	0	0	0	0	0	0	0	0	0	0	0									498	0	0	0	0	0	0	0	0	0	0	0	0	0	0	0	0	0	0	0
	499	0	0	0	0	0	0	0	0	0	0	0	0	0	0	0	0	0	0	0	0									499	0	0	0	0	0	0	0	0	0	0	0	0	0	0	0	0	0	0	0
	500	0	0	0	0	0	0	0	0	0	0	0	0	0	0	0	0	0	0	0	0									500	0	0	0	0	0	0	0	0	0	0	0	0	0	0	0	0	0	0	0
	501	0	0	0	0	0	0	0	0	0	0	0	0	0	0	0	0	0	0	0	0									501	0	0	0	0	0	0	0	0	0	0	0	0	0	0	0	0	0	0	0
	502	0	0	0	0	0	0	0	0	0	0	0	0	0	0	0	0	0	0	0	0									502	0	0	0	0	0	0	0	0	0	0	0	0	0	0	0	0	0	0	0
	503	0	0	0	0	0	0	0	0	0	0	0	0	0	0	0	0	0	0	0	0									503	0	0	0	0	0	0	0	0	0	0	0	0	0	0	0	0	0	0	0
	504	0	0	0	0	0	0	0	0	0	0	0	0	0	0	0	0	0	0	0	0									504	0	0	0	0	0	0	0	0	0	0	0	0	0	0	0	0	0	0	0
	505	0	0	0	0	0	0	0	0	0	0	0	0	0	0	0	0	0	0	0	0									505	0	0	0	0	0	0	0	0	0	0	0	0	0	0	0	0	0	0	0
	506	0	0	0	0	0	0	0	0	0	0	0	0	0	0	0	0	0	0	0	0									506	0	0	0	0	0	0	0	0	0	0	0	0	0	0	0	0	0	0	0
	507	0	0	0	0	0	0	0	0	0	0	0	0	0	0	0	0	0	0	0	0									507	0	0	0	0	0	0	0	0	0	0	0	0	0	0	0	0	0	0	0
	508	0	0	0	0	0	0	0	0	0	0	0	0	0	0	0	0	0	0	0	0									508	0	0	0	0	0	0	0	0	0	0	0	0	0	0	0	0	0	0	0
	509	0	0	0	0	0	0	0	0	0	0	0	0	0	0	0	0	0	0	0	0									509	0	0	0	0	0	0	0	0	0	0	0	0	0	0	0	0	0	0	0
	510	0	0	0	0	0	0	0	0	0	0	0	0	0	0	0	0	0	0	0	0									510	0	0	0	0	0	0	0	0	0	0	0	0	0	0	0	0	0	0	0
	511	0	0	0	0	0	0	0	0	0	0	0	0	0	0	0	0	0	0	0	0									511	0	0	0	0	0	0	0	0	0	0	0	0	0	0	0	0	0	0	0
	512	0	0	0	0	0	0	0	0	0	0	0	0	0	0	0	0	0	0	0	0									512	0	0	0	0	0	0	0	0	0	0	0	0	0	0	0	0	0	0	0
	513	0	0	0	0	0	0	0	0	0	0	0	0	0	0	0	0	0	0	0	0									513	0	0	0	0	0	0	0	0	0	0	0	0	0	0	0	0	0	0	0
	514	0	0	0	0	0	0	0	0	0	0	0	0	0	0	0	0	0	0	0	0									514	0	0	0	0	0	0	0	0	0	0	0	0	0	0	0	0	0	0	0
	515	0	0	0	0	0	0	0	0	0	0	0	0	0	0	0	0	0	0	0	0									515	0	0	0	0	0	0	0	0	0	0	0	0	0	0	0	0	0	0	0
	516	0	0	0	0	0	0	0	0	0	0	0	0	0	0	0	0	0	0	0	0									516	0	0	0	0	0	0	0	0	0	0	0	0	0	0	0	0	0	0	0
	517	0	0	0	0	0	0	0	0	0	0	0	0	0	0	0	0	0	0	0	0									517	0	0	0	0	0	0	0	0	0	0	0	0	0	0	0	0	0	0	0
	518	0	0	0	0	0	0	0	0	0	0	0	0	0	0	0	0	0	0	0	0									518	0	0	0	0	0	0	0	0	0	0	0	0	0	0	0	0	0	0	0
	519	0	0	0	0	0	0	0	0	0	0	0	0	0	0	0	0	0	0	0	0									519	0	0	0	0	0	0	0	0	0	0	0	0	0	0	0	0	0	0	0
	520	0	0	0	0	0	0	0	0	0	0	0	0	0	0	0	0	0	0	0	0									520	0	0	0	0	0	0	0	0	0	0	0	0	0	0	0	0	0	0	0
	521	0	0	0	0	0	0	0	0	0	0	0	0	0	0	0	0	0	0	0	0									521	0	0	0	0	0	0	0	0	0	0	0	0	0	0	0	0	0	0	0
	522	0	0	0	0	0	0	0	0	0	0	0	0	0	0	0	0	0	0	0	0									522	0	0	0	0	0	0	0	0	0	0	0	0	0	0	0	0	0	0	0
	523	0	0	0	0	0	0	0	0	0	0	0	0	0	0	0	0	0	0	0	0									523	0	0	0	0	0	0	0	0	0	0	0	0	0	0	0	0	0	0	0
	524	0	0	0	0	0	0	0	0	0	0	0	0	0	0	0	0	0	0	0	0									524	0	0	0	0	0	0	0	0	0	0	0	0	0	0	0	0	0	0	0
	525	0	0	0	0	0	0	0	0	0	0	0	0	0	0	0	0	0	0	0	0									525	0	0	0	0	0	0	0	0	0	0	0	0	0	0	0	0	0	0	0
	526	0	0	0	0	0	0	0	0	0	0	0	0	0	0	0	0	0	0	0	0									526	0	0	0	0	0	0	0	0	0	0	0	0	0	0	0	0	0	0	0
	527	0	0	0	0	0	0	0	0	0	0	0	0	0	0	0	0	0	0	0	0									527	0	0	0	0	0	0	0	0	0	0	0	0	0	0	0	0	0	0	0
	528	0	0	0	0	0	0	0	0	0	0	0	0	0	0	0	0	0	0	0	0									528	0	0	0	0	0	0	0	0	0	0	0	0	0	0	0	0	0	0	0
	529	0	0	0	0	0	0	0	0	0	0	0	0	0	0	0	0	0	0	0	0									529	0	0	0	0	0	0	0	0	0	0	0	0	0	0	0	0	0	0	0
	530	0	0	0	0	0	0	0	0	0	0	0	0	0	0	0	0	0	0	0	0									530	0	0	0	0	0	0	0	0	0	0	0	0	0	0	0	0	0	0	0
	531	0	0	0	0	0	0	0	0	0	0	0	0	0	0	0	0	0	0	0	0									531	0	0	0	0	0	0	0	0	0	0	0	0	0	0	0	0	0	0	0
	532	0	0	0	0	0	0	0	0	0	0	0	0	0	0	0	0	0	0	0	0									532	0	0	0	0	0	0	0	0	0	0	0	0	0	0	0	0	0	0	0
	533	0	0	0	0	0	0	0	0	0	0	0	0	0	0	0	0	0	0	0	0									533	0	0	0	0	0	0	0	0	0	0	0	0	0	0	0	0	0	0	0
	534	0	0	0	0	0	0	0	0	0	0	0	0	0	0	0	0	0	0	0	0									534	0	0	0	0	0	0	0	0	0	0	0	0	0	0	0	0	0	0	0
	535	0	0	0	0	0	0	0	0	0	0	0	0	0	0	0	0	0	0	0	0									535	0	0	0	0	0	0	0	0	0	0	0	0	0	0	0	0	0	0	0
	536	0	0	0	0	0	0	0	0	0	0	0	0	0	0	0	0	0	0	0	0									536	0	0	0	0	0	0	0	0	0	0	0	0	0	0	0	0	0	0	0
	537	0	0	0	0	0	0	0	0	0	0	0	0	0	0	0	0	0	0	0	0									537	0	0	0	0	0	0	0	0	0	0	0	0	0	0	0	0	0	0	0
	538	0	0	0	0	0	0	0	0	0	0	0	0	0	0	0	0	0	0	0	0									538	0	0	0	0	0	0	0	0	0	0	0	0	0	0	0	0	0	0	0
	539	0	0	0	0	0	0	0	0	0	0	0	0	0	0	0	0	0	0	0	0									539	0	0	0	0	0	0	0	0	0	0	0	0	0	0	0	0	0	0	0
	540	0	0	0	0	0	0	0	0	0	0	0	0	0	0	0	0	0	0	0	0									540	0	0	0	0	0	0	0	0	0	0	0	0	0	0	0	0	0	0	0
	541	0	0	0	0	0	0	0	0	0	0	0	0	0	0	0	0	0	0	0	0									541	0	0	0	0	0	0	0	0	0	0	0	0	0	0	0	0	0	0	0
	542	0	0	0	0	0	0	0	0	0	0	0	0	0	0	0	0	0	0	0	0									542	0	0	0	0	0	0	0	0	0	0	0	0	0	0	0	0	0	0	0
	543	0	0	0	0	0	0	0	0	0	0	0	0	0	0	0	0	0	0	0	0									543	0	0	0	0	0	0	0	0	0	0	0	0	0	0	0	0	0	0	0
	544	0	0	0	0	0	0	0	0	0	0	0	0	0	0	0	0	0	0	0	0									544	0	0	0	0	0	0	0	0	0	0	0	0	0	0	0	0	0	0	0
	545	0	0	0	0	0	0	0	0	0	0	0	0	0	0	0	0	0	0	0	0									545	0	0	0	0	0	0	0	0	0	0	0	0	0	0	0	0	0	0	0
	546	0	0	0	0	0	0	0	0	0	0	0	0	0	0	0	0	0	0	0	0									546	0	0	0	0	0	0	0	0	0	0	0	0	0	0	0	0	0	0	0
	547	0	0	0	0	0	0	0	0	0	0	0	0	0	0	0	0	0	0	0	0									547	0	0	0	0	0	0	0	0	0	0	0	0	0	0	0	0	0	0	0
	548	0	0	0	0	0	0	0	0	0	0	0	0	0	0	0	0	0	0	0	0									548	0	0	0	0	0	0	0	0	0	0	0	0	0	0	0	0	0	0	0
	549	0	0	0	0	0	0	0	0	0	0	0	0	0	0	0	0	0	0	0	0									549	0	0	0	0	0	0	0	0	0	0	0	0	0	0	0	0	0	0	0
	550	0	0	0	0	0	0	0	0	0	0	0	0	0	0	0	0	0	0	0	0									550	0	0	0	0	0	0	0	0	0	0	0	0	0	0	0	0	0	0	0
	551	0	0	0	0	0	0	0	0	0	0	0	0	0	0	0	0	0	0	0	0									551	0	0	0	0	0	0	0	0	0	0	0	0	0	0	0	0	0	0	0
	552	0	0	0	0	0	0	0	0	0	0	0	0	0	0	0	0	0	0	0	0									552	0	0	0	0	0	0	0	0	0	0	0	0	0	0	0	0	0	0	0
	553	0	0	0	0	0	0	0	0	0	0	0	0	0	0	0	0	0	0	0	0									553	0	0	0	0	0	0	0	0	0	0	0	0	0	0	0	0	0	0	0
	554	0	0	0	0	0	0	0	0	0	0	0	0	0	0	0	0	0	0	0	0									554	0	0	0	0	0	0	0	0	0	0	0	0	0	0	0	0	0	0	0
	555	0	0	0	0	0	0	0	0	0	0	0	0	0	0	0	0	0	0	0	0									555	0	0	0	0	0	0	0	0	0	0	0	0	0	0	0	0	0	0	0
	556	0	0	0	0	0	0	0	0	0	0	0	0	0	0	0	0	0	0	0	0									556	0	0	0	0	0	0	0	0	0	0	0	0	0	0	0	0	0	0	0
	557	0	0	0	0	0	0	0	0	0	0	0	0	0	0	0	0	0	0	0	0									557	0	0	0	0	0	0	0	0	0	0	0	0	0	0	0	0	0	0	0
	558	0	0	0	0	0	0	0	0	0	0	0	0	0	0	0	0	0	0	0	0									558	0	0	0	0	0	0	0	0	0	0	0	0	0	0	0	0	0	0	0
	559	0	0	0	0	0	0	0	0	0	0	0	0	0	0	0	0	0	0	0	0									559	0	0	0	0	0	0	0	0	0	0	0	0	0	0	0	0	0	0	0
	560	0	0	0	0	0	0	0	0	0	0	0	0	0	0	0	0	0	0	0	0									560	0	0	0	0	0	0	0	0	0	0	0	0	0	0	0	0	0	0	0
	561	0	0	0	0	0	0	0	0	0	0	0	0	0	0	0	0	0	0	0	0									561	0	0	0	0	0	0	0	0	0	0	0	0	0	0	0	0	0	0	0
	562	0	0	0	0	0	0	0	0	0	0	0	0	0	0	0	0	0	0	0	0									562	0	0	0	0	0	0	0	0	0	0	0	0	0	0	0	0	0	0	0
	563	0	0	0	0	0	0	0	0	0	0	0	0	0	0	0	0	0	0	0	0									563	0	0	0	0	0	0	0	0	0	0	0	0	0	0	0	0	0	0	0
	564	0	0	0	0	0	0	0	0	0	0	0	0	0	0	0	0	0	0	0	0									564	0	0	0	0	0	0	0	0	0	0	0	0	0	0	0	0	0	0	0
	565	0	0	0	0	0	0	0	0	0	0	0	0	0	0	0	0	0	0	0	0									565	0	0	0	0	0	0	0	0	0	0	0	0	0	0	0	0	0	0	0
	566	0	0	0	0	0	0	0	0	0	0	0	0	0	0	0	0	0	0	0	0									566	0	0	0	0	0	0	0	0	0	0	0	0	0	0	0	0	0	0	0
	567	0	0	0	0	0	0	0	0	0	0	0	0	0	0	0	0	0	0	0	0									567	0	0	0	0	0	0	0	0	0	0	0	0	0	0	0	0	0	0	0
	568	0	0	0	0	0	0	0	0	0	0	0	0	0	0	0	0	0	0	0	0									568	0	0	0	0	0	0	0	0	0	0	0	0	0	0	0	0	0	0	0
	569	0	0	0	0	0	0	0	0	0	0	0	0	0	0	0	0	0	0	0	0									569	0	0	0	0	0	0	0	0	0	0	0	0	0	0	0	0	0	0	0
	570	0	0	0	0	0	0	0	0	0	0	0	0	0	0	0	0	0	0	0	0									570	0	0	0	0	0	0	0	0	0	0	0	0	0	0	0	0	0	0	0
	571	0	0	0	0	0	0	0	0	0	0	0	0	0	0	0	0	0	0	0	0									571	0	0	0	0	0	0	0	0	0	0	0	0	0	0	0	0	0	0	0
	572	0	0	0	0	0	0	0	0	0	0	0	0	0	0	0	0	0	0	0	0									572	0	0	0	0	0	0	0	0	0	0	0	0	0	0	0	0	0	0	0
	573	0	0	0	0	0	0	0	0	0	0	0	0	0	0	0	0	0	0	0	0									573	0	0	0	0	0	0	0	0	0	0	0	0	0	0	0	0	0	0	0
	574	0	0	0	0	0	0	0	0	0	0	0	0	0	0	0	0	0	0	0	0									574	0	0	0	0	0	0	0	0	0	0	0	0	0	0	0	0	0	0	0
	575	0	0	0	0	0	0	0	0	0	0	0	0	0	0	0	0	0	0	0	0									575	0	0	0	0	0	0	0	0	0	0	0	0	0	0	0	0	0	0	0
	576	0	0	0	0	0	0	0	0	0	0	0	0	0	0	0	0	0	0	0	0									576	0	0	0	0	0	0	0	0	0	0	0	0	0	0	0	0	0	0	0
	577	0	0	0	0	0	0	0	0	0	0	0	0	0	0	0	0	0	0	0	0									577	0	0	0	0	0	0	0	0	0	0	0	0	0	0	0	0	0	0	0
[truncated: 645 more rows]
[truncated: 3 more columns]

## Sheet: 05
	OPTINALYSIS: SEQUENCE ANALYSIS THROUGH A LOOKING-GLASS
[truncated: 1,247 more rows]
[truncated: 3 more columns]

[truncated: 2 more sheets: 06, 07]
